# Supplementary material for: Comparative Transcriptomic Analysis of Primary Duck Hepatocytes Provides Insight into Differential Susceptibility to DHBV Infection
Source: PLoS One. 2016 Feb 22;11(2):e0149702. doi: 10.1371/journal.pone.0149702 (PMC4763071; doi:10.1371/journal.pone.0149702)
Supplement: S1 File — (XLSX) [file pone.0149702.s003.xlsx]

## Sheet: DMSO-8d Vs Con
Sheet S1. Differnetially expressed genes in comparison of DMSO-8d vs Con
AccID	Description	DMSO_Normalized	Con_Normalized	FoldChange	Log2FC	P-Value	FDR	Style	D1_DMSO	D2_DMSO	D3_DMSO	con_PDH1	con_PDH2	con_PDH3
AOAH	Uncharacterized protein	1844.63	17.6384	104.581	6.70847	4.71756e-74	6.32248e-70	up	2047	1598	2709	21	12	15
OLFML2A	Uncharacterized protein	2631.32	87.2794	30.1482	4.914	3.34717e-60	2.24294e-56	up	3105	2153	3865	69	53	106
ALB	Preproalbumin	3900.01	86128.8	0.0452811	-4.46495	5.93166e-59	2.64987e-55	down	3906	5394	3012	101142	64507	68158
LOC101799795	Uncharacterized protein	390.84	10203.9	0.0383032	-4.70639	6.02061e-58	2.01721e-54	down	380	316	667	10615	7732	8969
IL21R	interleukin 21 receptor	13.8619	982.708	0.0141058	-6.14757	9.04252e-57	2.42376e-53	down	24	7	19	980	806	831
SPARC	Uncharacterized protein	3027.17	57.5675	52.5847	5.71657	3.01262e-55	6.72919e-52	up	2841	1767	6345	53	81	17
RBP7	Retinoid-binding protein 7	55.9325	1995.71	0.0280264	-5.15707	3.80302e-55	7.28116e-52	down	67	91	10	2270	1749	1370
LOC101792054	cadherin-13-like	1402.99	15.0614	93.1516	6.54151	7.31868e-53	1.22606e-49	up	2145	1114	1590	22	14	6
PPP1R3C	Uncharacterized protein	2400.65	83.7062	28.6794	4.84194	9.78294e-53	1.45679e-49	up	3060	2080	3101	104	57	68
PXDN	Uncharacterized protein	1503.85	77.4828	19.4089	4.27864	6.97661e-48	9.35005e-45	up	1847	1036	2437	85	79	44
RERGL	Uncharacterized protein	453.575	7690.08	0.0589818	-4.08359	1.33419e-46	1.62553e-43	down	484	368	726	8777	6075	5943
LOC101795539	beta-microseminoprotein-like	102.861	3835.13	0.0268207	-5.22051	1.40214e-44	1.56596e-41	down	69	139	121	4035	3513	2712
BICC1	Uncharacterized protein	1536.52	90.3705	17.0025	4.08768	1.28867e-43	1.32851e-40	up	2421	1352	1457	94	66	82
LOC101790283	microtubule-associated protein futsch-like	850.896	37.0329	22.9768	4.52211	5.5559e-41	5.31858e-38	up	1050	724	1157	59	23	23
COL5A2	Uncharacterized protein	2085.09	155.18	13.4366	3.7481	1.05031e-40	9.38416e-38	up	2389	1871	2880	144	104	163
UCHL1	Ubiquitin carboxyl-terminal hydrolase	315.455	12.4516	25.3345	4.66303	1.04422e-38	8.74669e-36	up	379	353	307	8	8	16
LOC101795679	Uncharacterized protein	1054.95	9.2894	113.565	6.82737	7.75183e-38	6.11118e-35	up	1261	703	1784	7	11	6
FGD5	Uncharacterized protein	794.528	51.4753	15.4351	3.94815	1.88124e-37	1.40068e-34	up	1182	635	929	65	70	5
THBS1	Uncharacterized protein	5160.35	59581.1	0.0866105	-3.52931	2.00882e-37	1.41696e-34	down	4880	2618	11396	65698	39317	55706
LOC101794012	uncharacterized LOC101794012	1196.22	61.9568	19.3074	4.27108	1.03953e-36	6.96589e-34	up	1264	1297	1415	71	37	60
LOC101792179	Uncharacterized protein	1118.72	69.988	15.9844	3.99859	2.21457e-36	1.38959e-33	up	1377	976	1487	91	35	67
CCDC148	coiled-coil domain containing 148	396.503	8.44901	46.9289	5.5524	2.28107e-36	1.38959e-33	up	443	348	572	10	5	8
LOC101792796	uncharacterized LOC101792796	329.64	10.1289	32.5446	5.02435	7.01162e-36	4.08564e-33	up	488	217	461	17	5	7
SDPR	Serum deprivation-response protein	923.691	73.2457	12.6109	3.6566	2.56915e-35	1.43466e-32	up	1265	595	1422	88	67	44
GUCY1B3	Uncharacterized protein	847.134	53.8582	15.729	3.97535	4.03331e-35	2.16218e-32	up	996	657	1305	70	43	35
LOC101794963	uncharacterized LOC101794963	6.50494	371.165	0.0175257	-5.83438	1.60949e-34	8.29632e-32	down	8	8	5	393	298	304
CNTN4	Uncharacterized protein	406.994	1.42777	285.055	8.1551	5.77901e-34	2.86853e-31	up	536	265	645	2	0	2
ALDH9A1	Uncharacterized protein	5926.88	318.457	18.6113	4.2181	8.46962e-34	4.05392e-31	up	6888	5657	7550	396	164	313
LOC101804855	uncharacterized LOC101804855	1049.86	83.3979	12.5885	3.65404	5.00692e-33	2.31389e-30	up	1240	983	1346	115	67	49
YPEL1	yippee-like 1 (Drosophila)	1974.84	100.259	19.6975	4.29994	9.3152e-33	4.16141e-30	up	2609	1366	2995	167	40	80
CRMP1	Dihydropyrimidinase-related protein 1	407.949	0	Inf	20	2.36164e-32	1.02099e-29	up	463	440	452	0	0	0
GUCY1A3	Guanylate cyclase soluble subunit alpha-3	277.948	18.1029	15.3538	3.94053	3.36253e-32	1.40827e-29	up	347	130	541	31	9	12
LRP11	low density lipoprotein receptor-related protein 11	250.708	4.07888	61.4648	5.94169	3.73199e-32	1.51564e-29	up	286	191	401	8	2	2
PRPSAP2	Phosphoribosyl pyrophosphate synthetase-associated protein 2	1463.02	118.185	12.379	3.62983	4.27942e-32	1.68685e-29	up	1666	1375	1934	110	114	88
FBXO25	Uncharacterized protein	746.134	48.3898	15.4192	3.94666	7.00017e-32	2.68047e-29	up	841	561	1216	62	30	41
SLC25A29	Uncharacterized protein	2941.32	281.788	10.438	3.38378	1.4244e-31	5.30271e-29	up	3529	2910	3467	333	165	269
PDLIM4	Uncharacterized protein	347.466	3.42535	101.44	6.66448	2.8132e-30	1.01899e-27	up	241	198	827	3	3	3
GSN	Gelsolin	3611.47	417.023	8.66012	3.11439	4.24801e-30	1.4982e-27	up	4481	2888	5175	496	275	364
TNC	Uncharacterized protein	214.901	4022.23	0.0534283	-4.22625	7.21056e-30	2.47784e-27	down	461	159	120	3078	4227	3117
NPM3	Uncharacterized protein	151.646	1625.41	0.0932967	-3.42203	8.65265e-30	2.89907e-27	down	259	84	200	1805	1327	1248
FEZ1	Uncharacterized protein	124.867	0	Inf	20	9.15025e-30	2.99102e-27	up	192	86	161	0	0	0
SERPINE2	Uncharacterized protein	618.871	4826.22	0.128231	-2.96318	1.06066e-29	3.38452e-27	down	787	672	588	5898	3788	3474
LOC101803465	Uncharacterized protein	2331.59	275.652	8.45845	3.08039	5.10968e-29	1.59256e-26	up	2425	1507	4404	303	223	216
LOC101794341	Uncharacterized protein	9806.39	273.372	35.872	5.16478	5.78415e-29	1.7618e-26	up	9668	9827	13609	144	293	253
LOC101795489	uncharacterized LOC101795489	5645.99	696.176	8.11001	3.0197	8.03345e-29	2.39254e-26	up	6411	5358	7402	558	258	1010
LOC101801942	xin actin-binding repeat-containing protein 1-like	2291.01	32.7747	69.9017	6.12726	2.08457e-28	6.07335e-26	up	2960	1584	3547	37	42	9
SLC25A47	Uncharacterized protein	436.122	19.2758	22.6253	4.49987	3.90534e-28	1.1136e-25	up	470	408	608	14	12	24
DKK3	Uncharacterized protein	5164.67	571.769	9.03278	3.17517	1.07726e-27	3.0078e-25	up	5270	4124	8629	735	329	509
COL5A1	Uncharacterized protein	6435.35	440.393	14.6127	3.86916	1.36407e-27	3.73087e-25	up	7274	4068	11677	597	290	332
ZNF462	Uncharacterized protein	437.598	35.5993	12.2923	3.61968	2.52453e-27	6.76675e-25	up	582	303	659	53	19	28
FNDC1	Uncharacterized protein	138.253	5.92658	23.3275	4.54396	7.18614e-27	1.8884e-24	up	189	93	207	3	4	8
ENTPD1	Uncharacterized protein	1113.29	141.74	7.85446	2.97351	1.11457e-26	2.87259e-24	up	1104	746	2119	229	112	61
EML1	Uncharacterized protein	270.106	13.73	19.6727	4.29812	3.34645e-26	8.4621e-24	up	374	166	424	15	9	13
LOC101795304	Gallinacin-10	32149.8	4157.01	7.73388	2.95119	5.65689e-26	1.40396e-23	up	39718	31352	37386	5706	1898	3949
FAM171A1	Uncharacterized protein	260.615	9.38057	27.7824	4.7961	7.23541e-26	1.76307e-23	up	386	278	197	9	4	12
LAMP5	Uncharacterized protein	619.34	23.4812	26.376	4.72115	1.10097e-25	2.63485e-23	up	592	612	893	18	20	23
ARRDC4	Uncharacterized protein	426.655	26.4183	16.15	4.01346	1.13995e-25	2.68029e-23	up	530	320	644	25	21	24
TLR7	Toll-like receptor 7	268.079	2.89523	92.5935	6.53284	1.50006e-25	3.46617e-23	up	376	169	409	4	3	1
DCLK1	Uncharacterized protein	515.112	1.02633	501.895	8.97124	1.88162e-25	4.27415e-23	up	649	495	597	2	1	0
RERG	Uncharacterized protein	3876.46	353.489	10.9663	3.455	2.76798e-25	6.18275e-23	up	5144	2683	5852	540	88	372
LOC101791413	Stathmin	404.197	29.143	13.8694	3.79384	3.58328e-25	7.87263e-23	up	585	311	509	27	25	25
LOC101803042	uncharacterized LOC101803042	4741.76	682.561	6.94702	2.79639	4.09686e-25	8.73922e-23	up	5488	4301	6418	686	628	503
BATF3	Uncharacterized protein	9.13496	287.159	0.0318115	-4.97431	4.13467e-25	8.73922e-23	down	14	10	6	248	268	237
GPR133	Uncharacterized protein	166.305	2.69823	61.6348	5.94567	4.17333e-25	8.73922e-23	up	181	174	201	2	2	3
TPM4	tropomyosin 4	528.275	3654.85	0.144541	-2.79045	1.38214e-24	2.84976e-22	down	710	489	594	3468	3337	2868
CHGA	Uncharacterized protein	155.716	8.48073	18.3612	4.19859	1.59368e-24	3.23614e-22	up	135	128	280	3	9	9
FBN1	Uncharacterized protein	463.225	56.0578	8.26335	3.04673	1.76881e-24	3.53815e-22	up	769	425	370	72	70	11
MPDZ	Uncharacterized protein	324.46	20.1115	16.1331	4.01195	5.4587e-24	1.07585e-21	up	410	234	497	29	18	9
PTPN13	Uncharacterized protein	573.791	36.5865	15.6831	3.97114	7.03601e-24	1.36662e-21	up	745	355	950	66	19	21
APOD	Uncharacterized protein	192.578	4.79803	40.1368	5.32686	1.08198e-23	2.07152e-21	up	183	201	262	2	4	6
SLC12A2	Uncharacterized protein	1764	234.995	7.50656	2.90815	1.51475e-23	2.85925e-21	up	2273	1500	2297	371	188	105
VASH1	Uncharacterized protein	4605.41	753.782	6.10974	2.61111	5.41502e-23	1.00795e-20	up	5082	4334	6253	662	787	528
RB1	Uncharacterized protein	163.398	1468.8	0.111246	-3.16818	5.73764e-23	1.05337e-20	down	248	133	182	1310	1343	1211
PIK3C2G	Uncharacterized protein	8.83382	446.496	0.0197848	-5.65947	6.55356e-23	1.1869e-20	down	5	2	27	465	289	443
MCF2	Uncharacterized protein	232.497	8.13438	28.582	4.83703	9.32299e-23	1.66596e-20	up	352	200	243	6	9	6
NUDT4	Uncharacterized protein	11501	1567.85	7.3355	2.87489	1.00965e-22	1.78044e-20	up	13238	8804	18203	1685	1414	1106
TIMP2	Uncharacterized protein	2545.29	385.24	6.60702	2.724	1.02649e-22	1.78662e-20	up	2755	1861	4353	325	267	419
LOC101804974	Uncharacterized protein	788.701	65.9996	11.9501	3.57895	1.97589e-22	3.39498e-20	up	888	606	1266	80	45	55
SESN3	Uncharacterized protein	1366.89	56.4898	24.1971	4.59676	2.27521e-22	3.8598e-20	up	1691	878	2302	61	38	53
LOC101803165	elastin-like	4514.73	13.0007	347.267	8.4399	3.00338e-22	5.03142e-20	up	3565	4560	7158	11	13	10
LOC101794755	uncharacterized LOC101794755	8.4421	206.761	0.0408303	-4.61422	3.91795e-22	6.48251e-20	down	11	9	8	244	174	143
LOC101801610	protein FAM162B-like	125.562	928.294	0.135261	-2.88618	5.31765e-22	8.69112e-20	down	185	111	132	1062	731	718
MXRA7	matrix-remodelling associated 7	696.257	77.7871	8.95081	3.16202	5.97222e-22	9.64334e-20	up	978	664	707	97	50	66
ABCB4	Uncharacterized protein	31.0322	572.116	0.0542411	-4.20447	7.25172e-22	1.157e-19	down	36	44	17	760	448	369
FETUB	Uncharacterized protein	2667.85	414.345	6.43872	2.68677	7.68909e-22	1.21234e-19	up	3245	2627	3117	431	383	293
CNDP2	Uncharacterized protein	2651.45	417.901	6.34468	2.66555	9.3026e-22	1.44969e-19	up	3428	2160	3589	525	281	339
LOC101792997	probable G-protein coupled receptor 173-like	130.839	12.3229	10.6175	3.40838	1.37263e-21	2.11449e-19	up	198	101	155	9	7	16
KLF5	Uncharacterized protein	52.7134	446.144	0.118153	-3.08127	1.54999e-21	2.36056e-19	down	72	38	75	435	314	438
RAB3IL1	Uncharacterized protein	146.368	1014.02	0.144345	-2.79241	2.80658e-21	4.20892e-19	down	131	201	132	1075	742	904
LOC101804234	uncharacterized LOC101804234	498.732	27.2631	18.2933	4.19325	2.82647e-21	4.20892e-19	up	571	428	720	28	17	28
GABRA4	Uncharacterized protein	250.351	9.80102	25.5433	4.67487	4.39596e-21	6.47414e-19	up	294	177	413	13	8	6
MAN2B2	Alpha-mannosidase	4221.94	769.379	5.48746	2.45614	5.4205e-21	7.89626e-19	up	4159	3544	6942	781	685	585
LOC101794797	coiled-coil domain-containing protein 173-like	1483.32	250.165	5.92939	2.56788	5.61812e-21	8.06963e-19	up	1608	1294	2205	202	236	214
OTUD1	Uncharacterized protein	313.555	2059.02	0.152284	-2.71517	5.71741e-21	8.06963e-19	down	344	239	516	1985	1822	1653
NSMF	Uncharacterized protein	658.658	93.9718	7.00911	2.80923	5.72015e-21	8.06963e-19	up	725	543	1017	74	101	69
LOC101795307	elastin-like	1332.28	6.74848	197.419	7.62512	6.40838e-21	8.94636e-19	up	1101	1245	2218	7	7	4
LOC101789790	Uncharacterized protein	358.185	2236.16	0.160178	-2.64225	6.85187e-21	9.46689e-19	down	518	281	443	2309	1897	1769
ABCD4	Uncharacterized protein	43.045	439.115	0.0980266	-3.35068	7.01999e-21	9.6002e-19	down	62	43	39	478	346	357
ANKRD50	ankyrin repeat domain 50	479.165	61.4214	7.80128	2.96371	8.48611e-21	1.1488e-18	up	653	296	761	79	35	55
FAM83G	Uncharacterized protein	6.00692	134.488	0.044665	-4.48471	8.61092e-21	1.15404e-18	down	10	6	4	129	133	94
LOC101792486	solute carrier family 52, riboflavin transporter, member 3-like	67.5908	666.71	0.10138	-3.30216	1.1087e-20	1.47117e-18	down	79	49	110	593	593	568
LOC101804154	deleted in malignant brain tumors 1 protein-like	4623.31	824.202	5.60943	2.48785	1.35671e-20	1.7826e-18	up	6331	3738	5924	884	462	873
LOC101792638	cytochrome b reductase 1-like	240.094	18.3501	13.0841	3.70974	1.43889e-20	1.87223e-18	up	295	194	344	19	17	13
PLA2G4A	Uncharacterized protein	121.772	10.5149	11.5809	3.53368	1.48667e-20	1.89842e-18	up	208	92	122	14	8	7
SAMD12	sterile alpha motif domain containing 12	4288.68	124.319	34.4974	5.10842	1.48734e-20	1.89842e-18	up	3692	3541	7715	137	61	138
YPEL2	yippee-like 2 (Drosophila)	591.634	49.6157	11.9243	3.57584	1.83093e-20	2.31492e-18	up	533	519	991	45	37	49
TNFSF8	Tumor necrosis factor ligand superfamily member 8	26.0174	268.388	0.0969395	-3.36677	2.11651e-20	2.65098e-18	down	48	23	17	207	278	211
LOC101801232	tumor necrosis factor receptor superfamily member 21-like	260.216	2597.95	0.100162	-3.3196	2.60447e-20	3.23196e-18	down	315	291	251	2266	2352	2203
LOC101792645	Uncharacterized protein	29.1989	273.797	0.106644	-3.22912	2.91215e-20	3.5806e-18	down	51	24	25	248	261	212
BASP1	23 kDa cortical cytoskeleton-associated protein	1094.34	181.575	6.02692	2.59142	2.99365e-20	3.64735e-18	up	1589	948	1206	235	135	129
GAS2	Uncharacterized protein	770.004	40.6282	18.9524	4.24431	4.75689e-20	5.71935e-18	up	731	592	1381	53	23	36
LOC101800028	rho guanine nucleotide exchange factor 5-like	176.347	1778.61	0.0991484	-3.33427	4.77964e-20	5.71935e-18	down	323	150	127	2022	978	1821
LOC101800934	uncharacterized LOC101800934	672.462	13.3991	50.1872	5.64925	5.46275e-20	6.47891e-18	up	768	444	1182	21	5	12
TBC1D8	Uncharacterized protein	539.351	75.2475	7.1677	2.84151	8.13035e-20	9.55815e-18	up	552	415	924	60	68	68
PA2G4	proliferation-associated 2G4, 38kDa	706.546	3939.7	0.17934	-2.47923	8.36922e-20	9.75341e-18	down	977	502	1004	4180	3217	3165
SLIT3	Uncharacterized protein	199.068	9.34449	21.3033	4.413	8.44238e-20	9.75385e-18	up	289	139	272	10	10	5
PKNOX2	Uncharacterized protein	311.674	21.7511	14.3291	3.84087	9.86399e-20	1.12989e-17	up	326	256	501	25	13	21
PKD2	Uncharacterized protein	429.715	50.2125	8.55793	3.09726	1.29015e-19	1.46531e-17	up	532	455	442	55	44	36
SCD5	Uncharacterized protein	82.069	1.14178	71.878	6.16748	1.30439e-19	1.46903e-17	up	146	55	87	1	1	1
LOC101799608	cytosolic purine 5'-nucleotidase-like	1057.4	152.858	6.91754	2.79026	1.38433e-19	1.54607e-17	up	1170	1057	1335	151	115	141
FKBP9	Uncharacterized protein	441.328	64.2375	6.87026	2.78036	1.56176e-19	1.72981e-17	up	612	385	513	100	55	26
LOC101795101	Beta-defensin	5.63348	200.674	0.0280728	-5.15469	1.76014e-19	1.93355e-17	down	11	5	3	202	131	203
LOC101797313	glutathione S-transferase theta-1-like	1494.42	167.79	8.90649	3.15486	1.91264e-19	2.084e-17	up	1753	1522	1736	205	85	169
LDHA	L-lactate dehydrogenase	5243.45	24456.8	0.214397	-2.22165	2.24944e-19	2.43121e-17	down	6428	6522	3937	28826	19082	18488
TENM3	Uncharacterized protein	4212.55	767.874	5.48599	2.45575	2.40208e-19	2.57542e-17	up	4580	3473	6565	643	558	812
ACTG2	Actin, gamma-enteric smooth muscle	1560.22	224.234	6.95798	2.79867	2.62677e-19	2.79396e-17	up	2330	788	2536	256	95	258
LOC101797246	coagulation factor X-like	1878.98	318.067	5.90751	2.56255	2.66658e-19	2.81398e-17	up	2378	1620	2458	357	233	269
SPAG17	sperm associated antigen 17	132.829	1.12855	117.699	6.87895	2.8128e-19	2.94509e-17	up	198	66	218	1	0	2
EPHA2	Uncharacterized protein	112.061	927.972	0.120759	-3.0498	2.87281e-19	2.98461e-17	down	119	82	194	926	899	642
MAN1C1	alpha-1,2-Mannosidase	436.135	62.2935	7.00129	2.80762	5.18414e-19	5.34445e-17	up	507	414	559	69	45	54
USH1C	Uncharacterized protein	305.856	21.998	13.9038	3.79741	5.74433e-19	5.87676e-17	up	361	258	437	37	11	15
PPP2R2C	Serine/threonine-protein phosphatase 2A 55 kDa regulatory subunit B	65.9607	0.598437	110.222	6.78426	6.81992e-19	6.92429e-17	up	45	82	88	2	0	0
RAC3	Uncharacterized protein	372.745	37.5096	9.93733	3.31286	6.89007e-19	6.94291e-17	up	505	280	517	47	17	39
SLC43A2	Uncharacterized protein	3942.46	750.364	5.25406	2.39343	7.46841e-19	7.46952e-17	up	4838	3059	5854	1008	445	623
LOC101802247	uncharacterized LOC101802247	712.566	100.581	7.08453	2.82467	7.99869e-19	7.94062e-17	up	780	644	1016	85	101	77
LOC101798271	Uncharacterized protein	665.405	83.6312	7.95642	2.99212	9.89085e-19	9.74685e-17	up	785	555	961	110	41	80
ARHGEF10	Uncharacterized protein	389.24	41.5215	9.37441	3.22873	1.10569e-18	1.08164e-16	up	523	385	399	50	33	30
DCHS1	Uncharacterized protein	94.6533	5.3207	17.7896	4.15296	1.21963e-18	1.18446e-16	up	156	81	86	5	7	2
TP53INP1	Tumor protein p53-inducible nuclear protein 1	3905.22	782.691	4.98948	2.31889	1.26728e-18	1.22188e-16	up	4204	3469	5739	725	607	738
CIRH1A	Uncharacterized protein	90.4804	665.865	0.135884	-2.87955	1.31362e-18	1.25751e-16	down	123	75	114	756	447	599
PRKAR1B	Uncharacterized protein	258.381	27.7805	9.30081	3.21736	2.01477e-18	1.91503e-16	up	328	182	401	38	18	21
FGF13	Fibroblast growth factor	330.624	0.414668	797.323	9.63902	2.23133e-18	2.10594e-16	up	461	348	288	0	0	1
LOC101797666	Cytochrome P450 2H1	4.17702	153.032	0.027295	-5.19522	2.4358e-18	2.28284e-16	down	3	8	1	213	105	107
HECTD2	Uncharacterized protein	1092.92	188.829	5.78786	2.53303	2.47736e-18	2.30567e-16	up	1281	810	1747	179	132	190
CCDC80	Uncharacterized protein	1120.93	228.868	4.89772	2.29211	2.51113e-18	2.32098e-16	up	1265	792	1905	200	176	226
ATP1B3	Uncharacterized protein	1286.47	236.752	5.43382	2.44197	2.60575e-18	2.39193e-16	up	1624	893	2027	299	194	155
LOC101790536	uncharacterized LOC101790536	58.4893	723.224	0.080873	-3.6282	2.80905e-18	2.56101e-16	down	81	39	87	857	649	456
PRICKLE1	Uncharacterized protein	87.8933	8.69314	10.1107	3.33781	3.05586e-18	2.7672e-16	up	188	33	100	8	6	9
PFKFB3	Uncharacterized protein	8.95714	190.535	0.0470106	-4.41087	3.18294e-18	2.86293e-16	down	14	7	10	187	174	145
C6	Uncharacterized protein	428.109	33.6741	12.7133	3.66827	3.29181e-18	2.94112e-16	up	441	427	577	32	35	22
PCMTD1	Uncharacterized protein	788.421	133.52	5.90491	2.56191	4.72554e-18	4.19415e-16	up	745	760	1176	103	115	129
PITX3	Uncharacterized protein	70.2911	2.50123	28.1026	4.81263	4.9716e-18	4.38351e-16	up	91	49	108	0	1	5
LOC101792200	Uncharacterized protein	495.064	2466.43	0.200721	-2.31674	7.12182e-18	6.23834e-16	down	524	674	369	2897	1678	2126
DCAF5	Uncharacterized protein	371.952	1976.93	0.188147	-2.41007	7.57536e-18	6.59253e-16	down	442	242	641	2151	1328	1845
LOC101804342	Serine/threonine-protein kinase SNF1-like kinase 2	1611.97	325.976	4.94506	2.30599	7.99329e-18	6.91136e-16	up	1575	1298	2751	369	246	266
DDX24	Uncharacterized protein	266.586	1464.84	0.181989	-2.45807	1.07274e-17	9.21595e-16	down	384	196	352	1725	1186	1064
SLC6A2	Transporter	747.779	17.3207	43.1727	5.43205	1.49738e-17	1.27821e-15	up	908	573	1132	27	9	13
EZR	Uncharacterized protein	301.105	2381.61	0.126429	-2.9836	1.59859e-17	1.35597e-15	down	398	220	438	2009	2061	2167
TFDP2	Uncharacterized protein	361.854	44.1382	8.1982	3.03531	1.87339e-17	1.57907e-15	up	466	294	493	49	34	36
SERPINF2	Uncharacterized protein	156.67	1541.21	0.101654	-3.29826	2.14493e-17	1.79664e-15	down	72	307	70	1783	1384	1002
UTP20	Uncharacterized protein	537.676	2655.87	0.202448	-2.30438	2.43679e-17	2.02844e-15	down	842	348	712	3436	1926	1938
LOC101804267	Uncharacterized protein	385.955	21.5955	17.872	4.15963	3.21269e-17	2.6578e-15	up	361	354	608	15	8	33
LOC101804094	Uncharacterized protein	380.869	10.9921	34.6493	5.11475	3.86883e-17	3.18099e-15	up	486	196	702	13	4	13
EREG	Uncharacterized protein	169.378	1017.72	0.166428	-2.58703	5.02055e-17	4.10277e-15	down	194	131	267	1094	937	698
SERINC2	Uncharacterized protein	191.044	987.897	0.193385	-2.37045	5.93998e-17	4.8247e-15	down	211	164	284	1271	760	681
MXD4	Uncharacterized protein	479.42	71.8888	6.66891	2.73745	8.22975e-17	6.64428e-15	up	498	422	730	68	72	50
RRP12	Uncharacterized protein	280.595	1411.17	0.198838	-2.33033	1.03459e-16	8.30278e-15	down	376	264	310	1662	1187	979
LOC101793884	uncharacterized LOC101793884	3448.55	411.858	8.37315	3.06577	1.0987e-16	8.76473e-15	up	4224	2567	5300	736	161	296
FAM107A	Uncharacterized protein	875.029	142.604	6.13609	2.61732	1.2062e-16	9.56542e-15	up	1106	745	1161	184	98	110
MYO5C	myosin VC	244.443	22.9056	10.6717	3.41572	1.53033e-16	1.20644e-14	up	217	215	412	15	13	31
LOC101797679	CAD protein-like	26.1978	283.356	0.0924555	-3.4351	1.57621e-16	1.23535e-14	down	28	18	47	284	232	239
TACC1	transforming, acidic coiled-coil containing protein 1	767.173	47.4961	16.1523	4.01367	1.76945e-16	1.37873e-14	up	637	582	1486	13	5	100
SLC17A9	Uncharacterized protein	3.35957	136.893	0.0245416	-5.34863	1.77998e-16	1.37892e-14	down	1	6	3	117	116	126
SLC26A9	Uncharacterized protein	2445.48	551.548	4.43385	2.14856	2.0363e-16	1.56842e-14	up	2599	1805	4207	647	352	500
TRIM67	Uncharacterized protein	93.9964	0	Inf	20	2.39264e-16	1.83236e-14	up	149	72	105	0	0	0
ABI1	Uncharacterized protein	4491.65	1016.25	4.41982	2.14399	2.57299e-16	1.95928e-14	up	5196	3499	6986	1151	759	837
P4HA2	Uncharacterized protein	536.404	87.8752	6.10415	2.60979	2.89826e-16	2.19449e-14	up	544	502	784	92	48	96
AKAP2	A kinase (PRKA) anchor protein 2	161.378	14.3343	11.2582	3.4929	2.92752e-16	2.20419e-14	up	200	116	252	21	13	6
PTGER3	Uncharacterized protein	72.2293	6.40739	11.2728	3.49477	3.05068e-16	2.28409e-14	up	92	87	55	3	9	4
LOC101795805	Cdc42 effector protein 3	335.041	1725.36	0.194187	-2.36448	3.37148e-16	2.51025e-14	down	397	373	335	1687	1489	1407
NOLC1	Uncharacterized protein	610.641	2796.86	0.218331	-2.19541	3.96241e-16	2.93393e-14	down	885	462	780	3317	2298	1980
MAPK8IP3	Uncharacterized protein	1084.85	224.817	4.82548	2.27067	4.04728e-16	2.98031e-14	up	1249	850	1686	190	190	209
TRIO	Uncharacterized protein	1989.19	9076.4	0.219161	-2.18994	5.88777e-16	4.31191e-14	down	2280	1086	3845	8782	6940	8390
PHF17	PHD finger protein 17	1207.47	232.79	5.18692	2.37488	6.67489e-16	4.86179e-14	up	1549	947	1705	311	156	176
SEPP1	Uncharacterized protein	2543.96	557.108	4.56637	2.19105	8.24759e-16	5.97482e-14	up	3377	1988	3482	644	464	400
MMEL1	Uncharacterized protein	276.104	42.7748	6.45482	2.69038	8.92482e-16	6.43067e-14	up	212	321	378	73	15	35
LOC101791437	guanine nucleotide-binding protein G(o) subunit alpha-like	60.2514	1.95789	30.7736	4.94362	9.64456e-16	6.9121e-14	up	66	55	85	1	0	4
LAMC2	Uncharacterized protein	1532.71	6777.31	0.226153	-2.14463	1.43212e-15	1.02092e-13	down	815	674	4227	7634	3773	6942
LOC101797414	Uncharacterized protein	126.664	699.969	0.180956	-2.46629	1.68532e-15	1.19506e-13	down	187	122	117	732	496	648
LOC101802963	Uncharacterized protein	124.907	5.69568	21.9301	4.45484	1.71211e-15	1.20767e-13	up	164	109	155	5	4	6
LOC101805177	histone H4-like	398.527	58.7144	6.78754	2.76289	2.66341e-15	1.86885e-13	up	457	322	606	65	53	40
MOGAT1	Uncharacterized protein	973.024	9.96577	97.6365	6.60935	2.76162e-15	1.92767e-13	up	974	663	1825	11	3	13
SLC18A2	Uncharacterized protein	277.45	2.03944	136.042	7.08791	3.31434e-15	2.30149e-13	up	248	312	359	4	1	1
BDH1	Uncharacterized protein	612.736	23.5283	26.0425	4.70279	4.84366e-15	3.34612e-13	up	546	727	735	14	20	26
RCL1	Uncharacterized protein	46.4931	363.85	0.127781	-2.96826	5.12732e-15	3.52392e-13	down	62	27	78	412	287	284
LAMA4	Uncharacterized protein	901.465	182.711	4.93382	2.30271	5.73461e-15	3.92119e-13	up	1192	656	1315	237	113	153
FAM60A	Uncharacterized protein	48.8396	358.98	0.136051	-2.87778	5.79628e-15	3.94324e-13	down	60	21	99	359	334	262
LOC101805140	clusterin-like	176.511	11.018	16.0202	4.00182	6.10465e-15	4.13205e-13	up	153	139	327	2	4	21
AASS	Alpha-aminoadipic semialdehyde synthase, mitochondrial	1743.46	399.018	4.36938	2.12743	6.43309e-15	4.33247e-13	up	2205	1399	2446	346	332	370
GM2A	Uncharacterized protein	203.943	31.4133	6.49223	2.69871	6.50427e-15	4.35405e-13	up	130	158	432	29	26	28
OGDHL	2-oxoglutarate dehydrogenase E1 component-like, mitochondrial	326.791	4.323	75.5935	6.24019	6.53011e-15	4.35405e-13	up	397	252	492	6	3	3
LOC101795859	Uncharacterized protein	2.29295	252.315	0.00908766	-6.78188	6.60313e-15	4.38095e-13	down	1	2	5	381	174	154
NAT10	Uncharacterized protein	252.615	1201.28	0.210288	-2.24956	7.67564e-15	5.06743e-13	down	374	183	327	1469	908	900
DAP	Death-associated protein 1	1332.95	288.044	4.6276	2.21026	8.54995e-15	5.61698e-13	up	1534	1287	1691	350	222	213
KLF13	Uncharacterized protein	34.3714	281.531	0.122087	-3.03401	8.95368e-15	5.85352e-13	down	52	20	51	341	184	243
KCNK13	Uncharacterized protein	40.927	337.725	0.121185	-3.04472	1.12027e-14	7.28828e-13	down	79	26	39	373	260	277
LOC101793578	acrosin-like	176.449	13.2867	13.2801	3.7312	1.17435e-14	7.6032e-13	up	218	141	254	12	12	11
HHIPL1	Uncharacterized protein	197.931	17.1871	11.5162	3.5256	1.2194e-14	7.85695e-13	up	291	164	226	11	16	17
HIGD1A	Uncharacterized protein	76.7965	459.345	0.167187	-2.58046	1.25094e-14	7.97887e-13	down	97	66	101	573	322	362
PAH	Uncharacterized protein	2003.66	160.829	12.4584	3.63904	1.25427e-14	7.97887e-13	up	2176	2135	2366	205	123	113
SSTR1	Uncharacterized protein	1625.25	109.665	14.8201	3.88949	1.25619e-14	7.97887e-13	up	2110	1675	1639	112	83	98
PES1	Uncharacterized protein	280.581	1323.89	0.211936	-2.2383	1.34555e-14	8.50618e-13	down	339	174	491	1512	1054	1014
LOC101791915	chromosome unknown open reading frame, human C10orf11	78.4837	6.87933	11.4086	3.51205	1.3992e-14	8.8038e-13	up	106	54	117	9	3	7
PISD	Uncharacterized protein	389.538	1717.07	0.226862	-2.14011	1.42443e-14	8.92068e-13	down	544	332	461	1675	1479	1406
TTC25	Uncharacterized protein	20.0307	185.629	0.107907	-3.21214	1.49734e-14	9.33366e-13	down	21	21	25	252	151	110
NREP	neuronal regeneration related protein	1461.49	270.997	5.39303	2.4311	1.70131e-14	1.0556e-12	up	1481	1326	2203	329	98	315
FKBP1B	Peptidyl-prolyl cis-trans isomerase	245.98	11.0869	22.1866	4.47161	1.73487e-14	1.07146e-12	up	278	171	422	16	6	9
LOC101798958	Uncharacterized protein	136.017	688.41	0.197581	-2.33948	1.94779e-14	1.19744e-12	down	159	81	249	530	461	802
ANKS6	ankyrin repeat and sterile alpha motif domain containing 6	387.186	74.2213	5.21664	2.38312	2.01842e-14	1.2352e-12	up	469	421	392	40	98	49
EEF2K	Uncharacterized protein	1017.97	213.533	4.76727	2.25316	2.10218e-14	1.28061e-12	up	1067	943	1466	266	157	161
ANGPTL3	Uncharacterized protein	1539.29	76.2471	20.1881	4.33544	2.21676e-14	1.3443e-12	up	1630	1690	1784	45	44	106
PKDCC	Uncharacterized protein	63.2867	3.69811	17.1133	4.09704	2.23032e-14	1.34643e-12	up	97	48	75	4	1	5
LOC101793906	calcium-dependent secretion activator 1-like	79.5391	0	Inf	20	2.94902e-14	1.77232e-12	up	57	57	169	0	0	0
MEIS1	Uncharacterized protein	227.583	31.7227	7.17415	2.84281	2.98326e-14	1.78489e-12	up	265	143	406	40	20	27
UNC93A	Uncharacterized protein	151.199	6.12576	24.6825	4.62541	3.36894e-14	2.00669e-12	up	153	129	241	8	0	9
PIK3R3	Uncharacterized protein	401.146	54.3369	7.38259	2.88413	3.53155e-14	2.09424e-12	up	533	289	587	67	53	28
TMEM52	transmembrane protein 52	356.048	54.4085	6.54398	2.71017	3.63862e-14	2.14823e-12	up	425	351	424	54	39	52
LOC101790354	Uncharacterized protein	167.781	857.294	0.19571	-2.35321	3.9463e-14	2.31967e-12	down	162	80	375	868	661	759
RPS6KA5	Uncharacterized protein	113.586	657.828	0.172669	-2.53392	4.43039e-14	2.59284e-12	down	139	71	196	803	375	620
RSAD2	Radical S-adenosyl methionine domain-containing protein 2	480.283	4147.53	0.1158	-3.1103	5.29972e-14	3.08813e-12	down	428	435	788	4523	2612	4043
BCAS3	Uncharacterized protein	378.974	63.6089	5.95788	2.5748	5.37679e-14	3.11947e-12	up	459	354	475	62	52	55
SCG3	Uncharacterized protein	3339.66	144.148	23.1682	4.53407	7.1934e-14	4.15543e-12	up	2113	3722	5308	71	169	122
LOC101794236	C-type lectin domain family 2 member L-like	207.998	927.819	0.22418	-2.15727	7.55522e-14	4.34571e-12	down	249	219	225	1060	803	644
TXNIP	Uncharacterized protein	668.763	21.0091	31.832	4.99241	7.74348e-14	4.43496e-12	up	653	462	1262	32	18	9
LOC101801647	chromosome unknown open reading frame, human C16orf45	231.705	35.6813	6.49374	2.69905	8.0437e-14	4.5873e-12	up	295	212	282	32	30	32
MAP3K7CL	Uncharacterized protein	2203.62	8330.29	0.264531	-1.91849	1.08446e-13	6.15846e-12	down	3002	1736	2912	9896	5180	7603
LOC101800079	H/ACA ribonucleoprotein complex subunit 4-like	911.343	3625.6	0.251364	-1.99215	1.16472e-13	6.5863e-12	down	1222	594	1420	4235	2522	3085
SCIN	Uncharacterized protein	12.6905	153.639	0.0825992	-3.59773	1.58661e-13	8.93437e-12	down	12	16	13	157	101	153
SRSF5	Uncharacterized protein	1539.16	380.556	4.04451	2.01596	1.69842e-13	9.52395e-12	up	1821	1235	2294	406	275	341
EDN2	Uncharacterized protein	134.62	10.0738	13.3634	3.74022	2.00667e-13	1.12056e-11	up	235	88	151	14	6	8
ANXA5	Annexin	7664.23	2088.68	3.66941	1.87555	2.19929e-13	1.22302e-11	up	8078	6908	11291	2214	1580	1809
LOC101805156	Thy-1 membrane glycoprotein	41.3214	0.855793	48.2844	5.59348	2.34168e-13	1.29683e-11	up	55	30	60	0	2	0
SUCLA2	Succinyl-CoA ligase subunit beta	238.544	1034.66	0.230554	-2.11682	2.6577e-13	1.46578e-11	down	324	197	302	1026	934	791
DUSP1	Uncharacterized protein	332.433	1385.07	0.240012	-2.05882	3.24384e-13	1.78172e-11	down	342	260	561	1381	993	1319
TTC38	Uncharacterized protein	366.841	77.1809	4.753	2.24884	3.9214e-13	2.14509e-11	up	408	401	407	70	82	51
EFEMP1	EGF-containing fibulin-like extracellular matrix protein 1	4287.24	370.986	11.5563	3.53061	4.03903e-13	2.20045e-11	up	7293	3121	4513	374	150	470
LOC101789528	Uncharacterized protein	183.401	17.2607	10.6254	3.40944	4.0878e-13	2.218e-11	up	211	168	247	7	18	18
C1QTNF2	Complement C1q tumor necrosis factor-related protein 2	710.476	10.5722	67.2024	6.07044	4.26247e-13	2.30346e-11	up	700	466	1373	20	2	9
LOC101802349	Uncharacterized protein	954.627	205.751	4.63973	2.21404	4.78842e-13	2.57729e-11	up	1374	757	1175	280	67	225
LOC101793257	Fibroblast growth factor	515.17	12.1661	42.3446	5.40411	5.20058e-13	2.78793e-11	up	586	302	968	18	11	5
WDR36	Uncharacterized protein	415.249	1719.63	0.241475	-2.05005	5.88993e-13	3.13362e-11	down	480	246	768	1845	1244	1532
MAP1LC3B	Uncharacterized protein	2339.79	600.384	3.89716	1.96242	5.89221e-13	3.13362e-11	up	2541	1664	4066	614	433	558
UROC1	Uncharacterized protein	2671.99	402.679	6.63552	2.73021	6.2977e-13	3.33604e-11	up	3560	2589	2856	640	228	274
GPD1	Glycerol-3-phosphate dehydrogenase [NAD(+)]	2043.61	514.003	3.97588	1.99127	6.4738e-13	3.41582e-11	up	2704	1647	2728	653	356	401
LOC101791493	ras GTPase-activating protein SynGAP-like	161.318	1.25723	128.312	7.00351	6.70129e-13	3.52199e-11	up	120	157	273	0	1	2
LOC101801592	uncharacterized LOC101801592	287.051	46.3777	6.18941	2.6298	6.89401e-13	3.60912e-11	up	345	210	454	45	43	35
BCKDHB	Uncharacterized protein	652.988	135.813	4.80798	2.26543	8.07154e-13	4.20913e-11	up	736	619	863	121	132	104
PIK3IP1	Uncharacterized protein	87.5803	4.42522	19.7911	4.30678	8.83032e-13	4.58697e-11	up	142	68	93	5	2	5
DUSP5	Uncharacterized protein	43.3134	339.83	0.127456	-2.97193	9.0214e-13	4.66814e-11	down	47	31	75	359	297	254
LOC101800966	inter alpha-trypsin inhibitor, heavy chain 4-like	30.0377	259.168	0.1159	-3.10904	9.70966e-13	5.00495e-11	down	26	26	52	237	219	228
CYYR1	cysteine/tyrosine-rich 1	74.7149	5.19203	14.3903	3.84703	1.05517e-12	5.39798e-11	up	112	74	64	6	6	2
WDR43	Uncharacterized protein	720.104	2694.84	0.267216	-1.90392	1.05527e-12	5.39798e-11	down	1022	555	927	3122	2069	2111
TNNI3K	Uncharacterized protein	492.01	16.4352	29.9364	4.90383	1.12499e-12	5.73275e-11	up	446	342	962	2	6	32
FAM13B	Uncharacterized protein	703.643	170.825	4.11907	2.04232	1.20179e-12	6.10089e-11	up	1034	569	826	198	128	137
LOC101793263	Uncharacterized protein	1056.02	3760.56	0.280813	-1.83232	1.29915e-12	6.57024e-11	down	1305	1048	1199	4159	2877	3099
GABPA	Uncharacterized protein	992.434	3643.81	0.272362	-1.8764	1.35338e-12	6.81882e-11	down	1266	835	1320	3813	2849	3096
PDE7A	Uncharacterized protein	109.939	11.0583	9.94184	3.31351	1.42871e-12	7.17138e-11	up	164	86	131	13	9	8
LOC101797944	Stathmin	117.782	7.96384	14.7896	3.88651	1.47062e-12	7.35418e-11	up	133	75	213	4	10	6
PRR5	Protor-2-like protein	214.036	28.6225	7.47788	2.90263	1.49113e-12	7.42904e-11	up	291	188	253	27	17	32
LOC101792161	complement C5-like	1577.9	336.478	4.68945	2.22942	1.5603e-12	7.74487e-11	up	1838	1479	2048	394	255	264
MSRB3	Methionine-R-sulfoxide reductase B3, mitochondrial	277.878	63.6233	4.36755	2.12682	1.59978e-12	7.91155e-11	up	359	240	355	43	44	77
LOC101796387	alpha-2-macroglobulin-like protein 1-like	479.424	2253.15	0.21278	-2.23257	1.63081e-12	8.03533e-11	down	500	644	379	2090	1928	1936
LOC101795841	formin-2-like	108.466	19.7403	5.49464	2.45803	1.66631e-12	8.18018e-11	up	147	76	159	24	9	21
PDCD4	Uncharacterized protein	1307.6	200.639	6.5172	2.70425	1.73242e-12	8.47367e-11	up	1304	1370	1705	202	191	141
LOC101796956	melanotransferrin-like	17.8971	167.076	0.10712	-3.22271	1.74139e-12	8.48656e-11	down	23	11	30	133	155	147
RUVBL1	Uncharacterized protein	264.557	1067.98	0.247717	-2.01323	1.82939e-12	8.88313e-11	down	398	194	332	1339	856	726
LOC101797557	uncharacterized LOC101797557	541.243	8.67991	62.3558	5.96245	1.88738e-12	9.13164e-11	up	482	297	1192	8	5	10
KLC1	Uncharacterized protein	801.081	204.591	3.91553	1.96921	1.9763e-12	9.52749e-11	up	967	636	1184	197	164	182
LOC101799230	transmembrane protease serine 11E-like	0.764215	27.2922	0.0280012	-5.15837	2.0286e-12	9.74457e-11	down	1	0	2	42	16	19
FNIP1	Uncharacterized protein	896.485	216.629	4.13835	2.04905	2.20123e-12	1.0536e-10	up	966	754	1383	315	129	162
MPHOSPH10	Uncharacterized protein	223.132	935.206	0.238591	-2.06739	2.34737e-12	1.11955e-10	down	321	159	303	1097	744	696
ODC1	Ornithine decarboxylase	804.88	2930.76	0.274631	-1.86443	2.53648e-12	1.20546e-10	down	1007	642	1147	3279	2497	2125
MRPS15	Uncharacterized protein	139.821	631.569	0.221386	-2.17536	2.592e-12	1.22749e-10	down	167	133	174	641	581	461
PPP3CA	Serine/threonine-protein phosphatase	234.428	22.681	10.3359	3.36959	2.61592e-12	1.23446e-10	up	276	265	230	32	19	12
LOC101803807	collagen alpha-1(VIII) chain-like	327.412	4.15246	78.8477	6.301	2.68992e-12	1.26492e-10	up	539	272	311	4	4	3
LOC101800202	sperm-associated antigen 17-like	79.7814	2.51446	31.729	4.98773	2.80674e-12	1.31524e-10	up	105	51	128	0	2	4
ABCB1	Uncharacterized protein	12.8499	191.08	0.0672487	-3.89435	2.83805e-12	1.32528e-10	down	17	20	2	272	142	118
DDX21	Uncharacterized protein	812.596	2991.07	0.271674	-1.88005	2.95435e-12	1.37341e-10	down	1116	576	1165	3312	2485	2259
MRPL48	Uncharacterized protein	43.703	271.014	0.161258	-2.63256	2.96162e-12	1.37341e-10	down	57	29	69	359	173	216
TLCD1	TLC domain containing 1	51.0449	301.117	0.169518	-2.56049	3.28306e-12	1.51723e-10	down	56	51	65	352	256	208
KCNK1	Uncharacterized protein	625.175	6547.83	0.0954782	-3.38869	3.36417e-12	1.54937e-10	down	800	440	964	7041	3851	6736
LOC101795205	HERV-FRD_6p24.1 provirus ancestral Env polyprotein-like	1745.85	389.673	4.4803	2.16359	3.65057e-12	1.67551e-10	up	2139	1270	2729	602	167	333
RPL23A	Uncharacterized protein	2146.82	7449.62	0.288178	-1.79497	3.92472e-12	1.79519e-10	down	2563	1664	3267	8532	5727	5899
TUBB4B	Uncharacterized protein	720.309	2601.7	0.276861	-1.85276	4.08914e-12	1.86403e-10	down	1080	530	905	2956	2168	1904
LOC101793663	alpha-2-macroglobulin-like protein 1-like	51.1522	310.23	0.164884	-2.60047	4.29189e-12	1.94983e-10	down	54	66	44	365	212	266
ALCAM	Uncharacterized protein	658.647	141.23	4.66365	2.22146	4.42267e-12	2.00245e-10	up	1194	448	664	186	137	65
SLC9A5	Sodium/hydrogen exchanger	70.8413	1.32555	53.4428	5.73992	4.72383e-12	2.13161e-10	up	98	52	98	3	1	0
ALPK2	Uncharacterized protein	695.385	160.313	4.33767	2.11692	4.9558e-12	2.22878e-10	up	725	670	965	169	146	114
SDAD1	Uncharacterized protein	491.67	1820.15	0.270127	-1.88829	5.11054e-12	2.29068e-10	down	610	433	642	1911	1613	1346
CPN1	Uncharacterized protein	4142.88	543.09	7.62834	2.93137	5.22005e-12	2.33197e-10	up	4113	3391	6914	560	458	433
IL4R	Uncharacterized protein	1770.14	5971.55	0.296429	-1.75424	6.40172e-12	2.84136e-10	down	2226	1570	2262	6898	4492	4788
LOC101794339	Uncharacterized protein	280.485	51.2057	5.47761	2.45355	6.40272e-12	2.84136e-10	up	398	215	363	66	27	48
SLC19A1	Uncharacterized protein	329.809	1297.36	0.254215	-1.97588	6.8691e-12	3.03828e-10	down	423	214	536	1504	922	1092
LOC101795176	tyrosine-protein phosphatase non-receptor type 13-like	78.8757	2.62465	30.0519	4.90939	7.53014e-12	3.3197e-10	up	100	61	114	6	0	2
KCNT2	Potassium channel subfamily T member 2	327.635	54.988	5.9583	2.5749	7.6538e-12	3.36316e-10	up	463	241	442	87	26	43
USP18	Uncharacterized protein	105.718	490.378	0.215584	-2.21368	8.23202e-12	3.60541e-10	down	102	120	127	585	359	390
HSD11B2	Uncharacterized protein	155.846	13.7411	11.3416	3.50355	8.70976e-12	3.80222e-10	up	229	119	194	12	15	9
JUP	Uncharacterized protein	1694.23	491.714	3.44556	1.78474	9.07877e-12	3.95044e-10	up	1982	1252	2718	504	286	527
CCDC92	Uncharacterized protein	307.399	22.16	13.8718	3.79408	9.3313e-12	4.04719e-10	up	394	270	389	21	9	29
LOC101796393	protocadherin Fat 4-like	232.643	49.19	4.72948	2.24168	9.48289e-12	4.09967e-10	up	318	179	313	48	31	52
IL1RAP	Uncharacterized protein	294.732	1358.1	0.217018	-2.20411	1.04645e-11	4.50951e-10	down	329	182	546	1290	981	1332
XPO5	Uncharacterized protein	446.932	1604	0.278635	-1.84355	1.07865e-11	4.63337e-10	down	706	334	515	1979	1227	1174
THOP1	Uncharacterized protein	642.448	2303.72	0.278874	-1.84231	1.08916e-11	4.66354e-10	down	717	528	984	2490	1844	1856
LOC101800708	Uncharacterized protein	1.58166	328.736	0.00481135	-7.69934	1.09719e-11	4.68298e-10	down	3	2	0	266	214	380
BCL6	Uncharacterized protein	435.34	92.9268	4.68476	2.22798	1.13537e-11	4.83056e-10	up	458	341	723	97	66	86
PPP2R2B	Serine/threonine-protein phosphatase 2A 55 kDa regulatory subunit B	27.174	0.727115	37.3723	5.2239	1.16022e-11	4.92063e-10	up	41	32	15	1	1	0
CREG1	Uncharacterized protein	1082.95	3553.8	0.304731	-1.71439	1.4067e-11	5.9472e-10	down	1407	1083	1143	4349	2854	2487
GAB2	GRB2-associated binding protein 2	103.541	9.74066	10.6297	3.41003	1.44323e-11	6.08244e-10	up	162	92	98	17	7	4
LOC101800641	Uncharacterized protein	2.70168	88.6621	0.0304716	-5.03639	1.50864e-11	6.33817e-10	down	2	3	4	119	61	65
GCHFR	Uncharacterized protein	1070.79	228.341	4.68944	2.22941	1.54518e-11	6.47142e-10	up	1264	933	1483	262	113	245
NOC4L	Uncharacterized protein	240.818	940.73	0.255991	-1.96584	1.67416e-11	6.98974e-10	down	330	172	344	1091	733	725
NAPEPLD	Uncharacterized protein	3825.31	728.641	5.24992	2.3923	1.69992e-11	7.07526e-10	up	3863	2344	7551	775	531	650
C5	Uncharacterized protein	7328.64	1407.99	5.20502	2.3799	1.79024e-11	7.42809e-10	up	7908	6489	10783	1452	838	1483
SLCO5A1	Solute carrier organic anion transporter family member 5A1	73.5361	1.25723	58.4905	5.87013	1.914e-11	7.91712e-10	up	150	47	61	0	1	2
KDELR3	ER lumen protein-retaining receptor	912.278	240.601	3.79166	1.92283	1.92258e-11	7.92813e-10	up	1047	834	1234	266	197	185
UPP2	Uridine phosphorylase	4321.92	208.934	20.6856	4.37056	2.03361e-11	8.36027e-10	up	4023	3494	7568	206	132	219
NCL	Uncharacterized protein	5274.53	17142.1	0.307696	-1.70042	2.16312e-11	8.86549e-10	down	6556	4422	7225	19032	12978	14214
CCDC85C	Uncharacterized protein	813.68	104.936	7.75409	2.95496	2.22353e-11	9.08531e-10	up	742	714	1353	113	79	90
DDX18	Uncharacterized protein	389.163	1425.59	0.272983	-1.87312	2.25878e-11	9.20126e-10	down	555	293	509	1642	1162	1054
PTGR1	Uncharacterized protein	360.831	2138.58	0.168724	-2.56726	2.31738e-11	9.41137e-10	down	283	362	578	2025	1540	2107
PITPNM2	Uncharacterized protein	40.6637	261.295	0.155623	-2.68387	2.63287e-11	1.06603e-09	down	56	34	50	242	204	245
SIPA1L2	Uncharacterized protein	1160.56	152.833	7.59368	2.9248	2.6591e-11	1.07341e-09	up	1448	656	2082	191	86	142
SERPINC1	Uncharacterized protein	5398.3	1197.01	4.50983	2.17307	2.72284e-11	1.09584e-09	up	5441	5392	7392	1235	1019	944
ADAMTS15	Uncharacterized protein	199.991	1.85567	107.773	6.75185	2.73317e-11	1.0967e-09	up	170	134	411	2	1	2
MAP1A	Uncharacterized protein	334.508	60.7938	5.50234	2.46005	2.81363e-11	1.12562e-09	up	508	240	423	63	36	64
LOC101792939	uncharacterized LOC101792939	49.3168	1.88213	26.2027	4.71165	2.96676e-11	1.18335e-09	up	81	27	69	2	3	0
SYNPO2L	Uncharacterized protein	91.9087	3.42535	26.8319	4.74588	2.98426e-11	1.1868e-09	up	79	94	137	3	3	3
ADCY9	Uncharacterized protein	2182.51	629.011	3.46975	1.79483	2.99756e-11	1.18847e-09	up	3024	2017	2362	733	595	374
PALLD	Uncharacterized protein	2620.42	834.179	3.14132	1.65137	3.00619e-11	1.18847e-09	up	3693	1804	3740	722	492	983
UGT2A1	Uncharacterized protein	71.9824	386.03	0.186468	-2.423	3.01825e-11	1.18972e-09	down	72	51	132	424	313	302
IGFBP7	Uncharacterized protein	467.668	40.932	11.4255	3.51418	3.12142e-11	1.22678e-09	up	644	421	528	42	44	23
NRCAM	Uncharacterized protein	370.851	17.5679	21.1096	4.39983	3.39735e-11	1.33132e-09	up	593	373	269	15	17	14
NT5DC3	Uncharacterized protein	1437.21	4743.81	0.302966	-1.72277	3.46638e-11	1.35441e-09	down	1850	1183	1935	5353	4087	3360
LOC101804105	Uncharacterized protein	3177.44	292.176	10.8751	3.44296	3.5933e-11	1.39992e-09	up	3373	3482	3684	234	243	285
GNB5	Uncharacterized protein	4080.44	714.269	5.71274	2.51418	3.63123e-11	1.4106e-09	up	3933	3452	6760	740	487	686
TMEM123	Uncharacterized protein	102.369	581.492	0.176046	-2.50597	3.90177e-11	1.51131e-09	down	148	103	91	512	497	520
SMAD1	Mothers against decapentaplegic homolog	109.765	10.945	10.0288	3.32607	3.95873e-11	1.52896e-09	up	142	98	135	17	4	10
TTC27	tetratricopeptide repeat domain 27	219.411	830.714	0.264123	-1.92072	3.97578e-11	1.53113e-09	down	372	179	202	958	691	599
LOC101793041	EVI5-like protein-like	181.074	26.9934	6.7081	2.7459	4.00921e-11	1.53958e-09	up	198	169	250	17	26	26
UTP11L	Uncharacterized protein	99.583	451.858	0.220386	-2.1819	4.21433e-11	1.61373e-09	down	113	86	144	485	430	296
LOC101790701	uncharacterized LOC101790701	73.9549	1.49609	49.432	5.62737	4.3415e-11	1.65769e-09	up	79	71	101	5	0	0
HAS2	Hyaluronan synthase 2	5.59867	89.5018	0.0625537	-3.99876	4.67684e-11	1.78065e-09	down	5	2	14	123	34	92
LOC101802925	uncharacterized LOC101802925	91.6389	15.4358	5.93677	2.56968	4.98872e-11	1.89402e-09	up	94	36	211	11	9	20
UAP1L1	Uncharacterized protein	1326.05	377.876	3.50921	1.81115	5.11497e-11	1.93646e-09	up	1723	1236	1541	397	276	340
TCOF1	Treacher Collins-Franceschetti syndrome 1	252.761	965.143	0.26189	-1.93297	5.16545e-11	1.95006e-09	down	342	146	420	1102	731	778
LOC101803151	Bisphosphoglycerate mutase	1040.29	155.34	6.69683	2.74348	5.27198e-11	1.98469e-09	up	1234	710	1743	188	124	111
DTNA	Uncharacterized protein	74.4755	1.01311	73.5121	6.19991	5.8653e-11	2.20187e-09	up	169	39	57	2	0	1
HKDC1	Uncharacterized protein	2351.74	8266.44	0.284493	-1.81354	5.94414e-11	2.22523e-09	down	3512	2191	2246	7965	7544	6403
NETO2	Uncharacterized protein	137.669	20.5956	6.68441	2.7408	6.2105e-11	2.31847e-09	up	166	111	201	13	9	31
LOC101789386	TOX high mobility group box family member 2-like	146.38	3.71134	39.4413	5.30164	6.24324e-11	2.32422e-09	up	158	91	276	4	2	4
OLFML3	Uncharacterized protein	1290.61	327.614	3.93943	1.97799	6.62685e-11	2.4602e-09	up	1085	1171	2184	302	224	341
HELZ2	Uncharacterized protein	182.565	704.157	0.259267	-1.94749	7.01315e-11	2.59642e-09	down	220	182	212	836	529	549
GAR1	Uncharacterized protein	171.595	687.946	0.249431	-2.00328	7.16548e-11	2.6455e-09	down	225	127	249	776	504	579
PIGA	Uncharacterized protein	81.436	392.593	0.207431	-2.2693	7.24002e-11	2.66568e-09	down	98	74	106	408	356	285
ME1	NADP-dependent malic enzyme	267.547	16610.6	0.016107	-5.95617	7.39806e-11	2.7164e-09	down	275	407	141	14446	18609	10431
LOC101796826	Uncharacterized protein	2949.92	203.863	14.4701	3.855	7.45721e-11	2.73064e-09	up	3538	1888	5098	249	124	184
STOM	Uncharacterized protein	418.236	1598.31	0.261675	-1.93415	7.53727e-11	2.75244e-09	down	500	450	438	1610	1557	1086
C1QBP	Uncharacterized protein	927.731	3100.99	0.299172	-1.74095	7.55934e-11	2.753e-09	down	1246	687	1314	3344	2485	2501
LOC101796840	chromosome unknown open reading frame, human C3orf52	6.89588	62.3868	0.110534	-3.17743	7.70671e-11	2.79906e-09	down	8	2	16	74	33	63
LOC101799046	Uncharacterized protein	1858.8	168.541	11.0288	3.4632	8.16991e-11	2.95927e-09	up	1814	2024	2346	121	161	153
LOXL3	Uncharacterized protein	69.7799	8.55702	8.1547	3.02763	8.29532e-11	2.9966e-09	up	66	94	62	13	8	3
NADK	Uncharacterized protein	5832.4	1787.9	3.26215	1.70583	8.32991e-11	3.00101e-09	up	6847	5528	7417	2171	1319	1384
ITGA6	Uncharacterized protein	1996.73	8698.21	0.229556	-2.12308	8.38421e-11	3.01247e-09	down	2332	1353	3400	9617	6358	7476
LOC101800452	Uncharacterized protein	79.6014	1.85567	42.8963	5.42278	8.86596e-11	3.17705e-09	up	125	70	76	2	1	2
LOC101790845	ES1 protein homolog, mitochondrial-like	395.648	3.9502	100.159	6.64615	8.96392e-11	3.20358e-09	up	558	186	700	9	1	2
LOC101798721	chromosome unknown open reading frame, human C3orf58	394.066	100.198	3.93287	1.97558	9.07553e-11	3.23485e-09	up	442	268	689	107	76	86
LYAR	Cell growth-regulating nucleolar protein	141.325	586.93	0.240787	-2.05417	9.44796e-11	3.35866e-09	down	210	105	178	689	478	425
SCG5	Uncharacterized protein	128.286	7.54391	17.0052	4.0879	9.59498e-11	3.4019e-09	up	154	113	173	11	8	2
TTC14	Uncharacterized protein	508.757	124.847	4.07506	2.02682	9.71869e-11	3.43667e-09	up	579	466	692	121	118	92
FOXO3	Uncharacterized protein	164.488	27.4653	5.98895	2.5823	9.94347e-11	3.5069e-09	up	199	110	275	23	20	29
SLC4A4	Electrogenic sodium bicarbonate cotransporter 1	3014.26	9494.99	0.317458	-1.65536	1.00926e-10	3.55014e-09	down	3582	2174	4860	11451	6675	7747
HMOX1	Heme oxygenase-1	274.219	1172.38	0.233899	-2.09605	1.03247e-10	3.62229e-09	down	339	264	324	1539	933	754
KCNB1	Uncharacterized protein	78.187	3.60912	21.6638	4.43721	1.05207e-10	3.68143e-09	up	71	93	92	5	3	2
POP1	Uncharacterized protein	60.7655	484.582	0.125398	-2.99541	1.09719e-10	3.8293e-09	down	73	35	111	531	484	286
GALNT7	Polypeptide N-acetylgalactosaminyltransferase	140.033	36.0004	3.88976	1.95968	1.26728e-10	4.40456e-09	up	177	156	128	24	47	21
LOC101791873	alcohol dehydrogenase 1-like	976.091	72.3444	13.4923	3.75406	1.26859e-10	4.40456e-09	up	1160	630	1690	84	58	54
RRP7A	Uncharacterized protein	106.405	468.82	0.226964	-2.13946	1.27495e-10	4.4152e-09	down	139	80	153	556	357	361
ACOX2	Acyl-coenzyme A oxidase	3209.09	406.57	7.89308	2.98059	1.33072e-10	4.59646e-09	up	4928	2831	3169	487	284	336
PLCXD2	Uncharacterized protein	193.804	1790.68	0.10823	-3.20783	1.39088e-10	4.79192e-09	down	307	154	208	2232	1654	1001
GABARAPL1	Uncharacterized protein	799.818	176.514	4.53118	2.17989	1.40301e-10	4.82133e-09	up	1014	896	720	218	137	127
LOC101795317	chromosome unknown open reading frame, human C20orf194	342.721	87.9797	3.89546	1.96179	1.49636e-10	5.12454e-09	up	403	449	240	64	125	37
SYTL3	Uncharacterized protein	25.8601	226.911	0.113966	-3.13333	1.4989e-10	5.12454e-09	down	29	26	32	192	209	193
NOL6	Uncharacterized protein	107.081	477.485	0.224261	-2.15675	1.55977e-10	5.31911e-09	down	133	61	192	472	373	426
SERPINB1	Uncharacterized protein	987.765	66.8885	14.7673	3.88434	1.57656e-10	5.36271e-09	up	947	749	1778	71	65	43
FA2H	Uncharacterized protein	144.754	571.712	0.253194	-1.98168	1.58474e-10	5.37623e-09	down	223	110	170	658	405	486
ANXA13	Annexin	354.76	1080.09	0.328456	-1.60623	1.59108e-10	5.37623e-09	down	608	307	292	1434	782	763
PCMTD2	Uncharacterized protein	505.839	127.073	3.98069	1.99302	1.59257e-10	5.37623e-09	up	605	500	599	146	97	101
RABGGTB	Uncharacterized protein	1071.32	3360.57	0.318791	-1.64932	1.60566e-10	5.40678e-09	down	1300	990	1357	3970	2682	2472
EIF5A2	Uncharacterized protein	2022.04	6203.8	0.325936	-1.61734	1.66577e-10	5.59514e-09	down	2795	1827	2261	7215	4848	4752
TANC2	tetratricopeptide repeat, ankyrin repeat and coiled-coil containing 2	268.808	4.323	62.1808	5.9584	1.68604e-10	5.64908e-09	up	236	104	664	6	3	3
SLC2A12	Uncharacterized protein	418.792	79.6892	5.25531	2.39378	1.69083e-10	5.65101e-09	up	590	378	457	102	18	100
LARGE	Glycosyltransferase-like protein LARGE1	389.826	53.1703	7.33166	2.87414	1.89561e-10	6.30812e-09	up	500	217	690	58	43	42
TTF1	Uncharacterized protein	181.121	701.13	0.258327	-1.95273	1.89686e-10	6.30812e-09	down	241	136	256	783	590	517
RRP15	Uncharacterized protein	140.454	572.249	0.245442	-2.02655	2.0653e-10	6.85126e-09	down	213	102	176	601	481	450
KCTD19	potassium channel tetramerization domain containing 19	609.521	161.491	3.77434	1.91623	2.09895e-10	6.94571e-09	up	755	479	888	187	110	141
LOC101793735	chromosome unknown open reading frame, human C1orf21	400.197	81.1728	4.93019	2.30164	2.17606e-10	7.18314e-09	up	451	275	693	100	50	72
DAB1	Uncharacterized protein	1748.36	113.774	15.367	3.94176	2.3467e-10	7.7274e-09	up	1485	1675	2803	157	34	126
MAFF	v-maf musculoaponeurotic fibrosarcoma oncogene homolog F (avian)	10.0953	101.961	0.0990108	-3.33627	2.47558e-10	8.13181e-09	down	10	5	22	85	80	102
LOC101791410	Testis-specific gene 118 protein	279.777	1002.81	0.278993	-1.8417	2.54605e-10	8.34283e-09	down	374	206	400	1113	822	767
SLC2A9	Uncharacterized protein	28.0484	1169.03	0.0239929	-5.38125	2.5741e-10	8.41415e-09	down	16	36	39	900	839	1304
ARSA	Uncharacterized protein	472.33	123.734	3.8173	1.93255	2.60469e-10	8.49343e-09	up	723	290	668	152	85	101
GNL3	Uncharacterized protein	704.786	2267.23	0.310858	-1.68567	2.63259e-10	8.5636e-09	down	990	572	873	2627	1786	1729
CNKSR3	Uncharacterized protein	166.852	616.456	0.270663	-1.88543	2.65298e-10	8.60901e-09	down	206	145	222	629	431	588
SERPIND1	Uncharacterized protein	5187.06	1697.86	3.05505	1.6112	2.78694e-10	9.02188e-09	up	6049	4659	7044	1700	1405	1418
LOC101799350	chromosome unknown open reading frame, human C2orf43	1547.21	209.713	7.37778	2.88319	3.16154e-10	1.02099e-08	up	1511	1757	1838	261	138	175
PARVG	Uncharacterized protein	224.159	27.0755	8.27903	3.04946	3.25884e-10	1.04988e-08	up	240	269	221	31	29	13
PARM1	Uncharacterized protein	99.7092	12.6963	7.85344	2.97332	3.42322e-10	1.10019e-08	up	98	73	181	17	11	7
NPAS2	Uncharacterized protein	256.134	44.0743	5.81141	2.53889	3.44665e-10	1.10507e-08	up	255	219	412	52	24	44
NOP14	Nucleolar protein 14	401.067	1305.89	0.307121	-1.70312	3.53629e-10	1.13111e-08	down	601	336	440	1673	973	938
SPR	Uncharacterized protein	77.9364	324.276	0.24034	-2.05685	3.54935e-10	1.13258e-08	down	85	100	65	388	252	242
PARVB	Uncharacterized protein	203.871	36.705	5.55431	2.47361	3.63657e-10	1.15766e-08	up	271	203	210	55	26	22
GSTO1	Uncharacterized protein	69.632	460.907	0.151076	-2.72665	3.66405e-10	1.16364e-08	down	102	50	92	618	394	259
LOC101790919	Zinc finger protein RFP	49.0667	235.829	0.20806	-2.26493	3.92165e-10	1.24251e-08	down	91	31	51	288	185	170
FABP7	Uncharacterized protein	31.351	472.538	0.066346	-3.91385	3.993e-10	1.26213e-08	down	42	28	37	380	450	401
NBR1	Uncharacterized protein	4253.88	1405.02	3.02764	1.59819	4.06135e-10	1.28071e-08	up	4579	3475	6729	1501	915	1361
ATPAF1	Uncharacterized protein	40.3603	225.543	0.178947	-2.4824	4.1093e-10	1.29279e-08	down	65	36	36	263	161	188
LOC101791543	1-acyl-sn-glycerol-3-phosphate acyltransferase	1.6886	37.4735	0.0450613	-4.47197	4.432e-10	1.39105e-08	down	1	3	1	48	23	32
CRY2	Uncharacterized protein	831.108	226.358	3.67165	1.87643	4.45953e-10	1.39642e-08	up	827	784	1222	265	146	204
PROZ	Uncharacterized protein	1170.58	122.134	9.58442	3.26069	4.74965e-10	1.48379e-08	up	1346	1278	1254	139	70	122
LOC101793519	Uncharacterized protein	63.8793	1.99758	31.9784	4.99903	4.86402e-10	1.51599e-08	up	56	73	82	1	3	1
CCT8	Uncharacterized protein	1293.15	3972.78	0.325501	-1.61926	5.05298e-10	1.57123e-08	down	1539	1066	1873	4240	3013	3412
LOC101802072	uncharacterized LOC101802072	109.285	4.30978	25.3575	4.66434	5.24898e-10	1.6284e-08	up	143	119	99	6	2	4
ARPC1A	Uncharacterized protein	1332.13	4087.09	0.325938	-1.61733	5.57439e-10	1.72536e-08	down	1754	1037	1845	4483	2803	3729
SLC34A1	Uncharacterized protein	276.808	31.3918	8.81784	3.14043	5.79428e-10	1.78928e-08	up	373	166	452	46	16	26
THUMPD2	Uncharacterized protein	137.457	519.045	0.264827	-1.91688	6.27336e-10	1.93277e-08	down	160	133	172	629	371	415
LOC101794148	Transforming growth factor beta-2	2441.53	572.961	4.26126	2.09128	6.31992e-10	1.94265e-08	up	3319	1352	4132	600	338	600
DIMT1	Uncharacterized protein	166.992	647.253	0.258001	-1.95455	6.38789e-10	1.95905e-08	down	216	101	281	739	459	554
EPHB2	Receptor protein-tyrosine kinase	38.7612	2.28357	16.974	4.08525	6.53531e-10	1.99969e-08	up	59	29	47	2	2	2
LOC101799942	E3 ubiquitin-protein ligase NEURL1B-like	103.206	8.72177	11.8332	3.56477	6.55401e-10	2.00084e-08	up	135	86	135	11	3	10
LOC101800515	uncharacterized LOC101800515	0.764215	89.8056	0.00850966	-6.87668	6.71472e-10	2.04524e-08	down	1	0	2	59	94	77
EVA1A	Uncharacterized protein	69.2277	1.01311	68.3322	6.09449	6.75614e-10	2.05319e-08	up	65	29	163	2	0	1
LOC101803396	Uncharacterized protein	42.4586	3.70916	11.447	3.51689	6.81632e-10	2.06679e-08	up	57	22	75	1	7	1
LOC101803666	Integrin beta	1355.54	289.121	4.68849	2.22912	6.88056e-10	2.08156e-08	up	1890	854	2081	402	99	305
FHDC1	FH2 domain containing 1	126.847	11.9824	10.5862	3.40411	7.12487e-10	2.15062e-08	up	143	120	168	16	11	6
NT5C1B	Cytosolic 5'-nucleotidase 1B	1267.82	378.772	3.34718	1.74295	7.37282e-10	2.22046e-08	up	1568	1285	1396	438	294	294
SLC39A8	Zinc transporter ZIP8	441.89	1407.56	0.313939	-1.67144	7.62169e-10	2.29027e-08	down	541	424	530	1649	926	1249
PIK3R1	Uncharacterized protein	1102.44	332	3.32061	1.73145	7.68226e-10	2.29892e-08	up	1204	1002	1566	360	184	351
EXOSC2	Uncharacterized protein	80.8986	349.253	0.231633	-2.11009	7.68478e-10	2.29892e-08	down	124	46	120	488	223	260
LOC101797314	HIG1 domain family member 1A, mitochondrial-like	30.1965	189.658	0.159216	-2.65094	7.75198e-10	2.31385e-08	down	35	26	43	233	133	152
LOC101791293	pleckstrin homology domain-containing family G member 4B-like	2322.23	769.374	3.01834	1.59375	7.81216e-10	2.32649e-08	up	2807	1805	3489	801	483	779
CD99L2	Uncharacterized protein	425.946	107.156	3.97499	1.99095	7.82902e-10	2.32649e-08	up	528	366	571	134	54	106
LOC101804851	Uncharacterized protein	1280.95	3891.99	0.329126	-1.60329	7.85502e-10	2.32905e-08	down	1537	1145	1702	3992	3267	3134
BDNF	Brain-derived neurotrophic factor	72.728	2.69823	26.9539	4.75242	8.18626e-10	2.41294e-08	up	82	69	96	2	2	3
LOC101791976	uncharacterized LOC101791976	67.0605	7.33895	9.13761	3.19182	8.191e-10	2.41294e-08	up	59	60	112	2	8	8
UTP15	Uncharacterized protein	229.667	826.594	0.277848	-1.84763	8.19197e-10	2.41294e-08	down	240	187	372	793	695	704
MPP6	Uncharacterized protein	73.8981	461.884	0.159993	-2.64392	8.89112e-10	2.61313e-08	down	104	64	85	669	286	336
FRMD4A	Uncharacterized protein	126.36	25.0985	5.03457	2.33187	9.4693e-10	2.77105e-08	up	192	93	156	26	24	17
ZNRF2	Uncharacterized protein	2511.01	759.335	3.30686	1.72546	9.46977e-10	2.77105e-08	up	3357	2170	3085	910	550	607
PLK3	Serine/threonine-protein kinase PLK	53.2322	263.817	0.201777	-2.30917	9.88175e-10	2.8853e-08	down	49	48	86	296	239	176
ETV1	Uncharacterized protein	68.6584	279.929	0.245271	-2.02755	1.03463e-09	3.01438e-08	down	71	47	126	225	179	328
MKNK1	Uncharacterized protein	64.0172	293.957	0.217777	-2.19907	1.06616e-09	3.0995e-08	down	86	58	74	259	251	263
PACS2	Uncharacterized protein	549.74	165.914	3.31341	1.72832	1.12363e-09	3.2595e-08	up	629	405	899	189	117	143
LOC101800600	zinc finger protein 92-like	94.5309	11.4486	8.25696	3.04561	1.22778e-09	3.55394e-08	up	141	82	100	16	2	14
KIAA1279	Uncharacterized protein	768.865	2413.03	0.31863	-1.65004	1.23837e-09	3.5746e-08	down	1007	597	1073	2393	2208	1814
B3GNT7	Uncharacterized protein	16.0318	84.6797	0.189323	-2.40108	1.24026e-09	3.5746e-08	down	16	18	19	106	54	72
COMT	Uncharacterized protein	1467.25	11120	0.131946	-2.92198	1.26801e-09	3.64675e-08	down	1375	2216	941	10796	12210	6427
TM6SF2	transmembrane 6 superfamily member 2	9.18867	108.649	0.0845723	-3.56367	1.3378e-09	3.83922e-08	down	11	9	11	144	66	90
GNG4	Guanine nucleotide-binding protein subunit gamma	25.8615	265.642	0.0973546	-3.36061	1.34143e-09	3.84055e-08	down	19	29	38	222	264	208
TMPO	Uncharacterized protein	776.447	2343.58	0.331309	-1.59375	1.34399e-09	3.84055e-08	down	1084	695	867	2557	1837	1911
TBRG4	transforming growth factor beta regulator 4	249.067	855.669	0.291078	-1.78052	1.40434e-09	4.00445e-08	down	328	190	351	905	673	716
COL19A1	Uncharacterized protein	47.9169	0	Inf	20	1.46913e-09	4.1803e-08	up	52	47	63	0	0	0
HTR2A	5-hydroxytryptamine receptor 2A	326.426	65.5597	4.97906	2.31587	1.49922e-09	4.25593e-08	up	352	339	402	96	26	62
SOGA3	Uncharacterized protein	294.22	0.299219	983.293	9.94148	1.50206e-09	4.25593e-08	up	467	394	63	1	0	0
LOC101800302	PDZ and LIM domain protein 3-like	636.818	165.211	3.85458	1.94657	1.6333e-09	4.61803e-08	up	557	594	1029	150	131	155
DDX17	Uncharacterized protein	1711.63	560.457	3.05399	1.61069	1.68219e-09	4.74626e-08	up	1918	1510	2451	607	457	442
PARVA	Uncharacterized protein	487.88	1477.54	0.330197	-1.5986	1.7052e-09	4.80107e-08	down	641	469	537	1619	1221	1135
HHIP	Uncharacterized protein	25.6821	168.896	0.152058	-2.7173	1.71802e-09	4.82703e-08	down	33	40	5	206	146	108
GPR143	G-protein coupled receptor 143	156.544	20.9689	7.4655	2.90024	1.72395e-09	4.83356e-08	up	196	135	207	21	13	22
OSBPL5	Oxysterol-binding protein	1082.43	269.226	4.02052	2.00738	1.86369e-09	5.21443e-08	up	1049	849	1892	279	186	256
TAF4B	Uncharacterized protein	20.7741	159.99	0.129846	-2.94513	1.93267e-09	5.39618e-08	down	43	13	17	193	143	99
PHYH	Uncharacterized protein	781.732	217.622	3.59215	1.84485	1.97813e-09	5.51162e-08	up	1037	654	1003	343	135	138
TRIM3	Uncharacterized protein	673.242	3543.23	0.190008	-2.39587	2.0357e-09	5.66025e-08	down	431	717	1117	3261	3092	3001
CEP170	Uncharacterized protein	849.805	258.269	3.29039	1.71826	2.0618e-09	5.72096e-08	up	1105	762	1034	312	210	181
SAT1	Uncharacterized protein	2213.96	736.278	3.00696	1.58831	2.24061e-09	6.19457e-08	up	2237	2222	3009	733	585	643
RANBP1	Uncharacterized protein	684.781	2072.02	0.33049	-1.59732	2.24173e-09	6.19457e-08	down	912	567	884	2287	1616	1679
KIF26B	Kinesin-like protein	35.6492	0.598437	59.5705	5.89653	2.25544e-09	6.21964e-08	up	68	27	28	2	0	0
LYPD6	LY6/PLAUR domain containing 6	242.006	7.04191	34.3666	5.10293	2.47021e-09	6.79788e-08	up	224	204	412	4	3	11
DYNLT1	Uncharacterized protein	92.879	16.3393	5.6844	2.50701	2.48176e-09	6.81569e-08	up	132	82	103	18	13	13
TRPC1	Uncharacterized protein	330.382	86.272	3.82954	1.93717	2.53659e-09	6.95202e-08	up	393	262	495	71	57	98
FKBP4	Uncharacterized protein	693.361	2111.4	0.328389	-1.60652	2.589e-09	7.08118e-08	down	959	583	843	2175	1923	1538
WDR1	Uncharacterized protein	1990.02	5801.71	0.343006	-1.54369	2.69889e-09	7.36672e-08	down	2625	1413	2965	6352	4411	4856
MATK	Non-specific protein-tyrosine kinase	183.251	898.098	0.204043	-2.29305	2.73828e-09	7.45903e-08	down	132	112	419	746	800	802
NPM1	Uncharacterized protein	3692.23	10769.4	0.342845	-1.54437	2.7694e-09	7.52849e-08	down	4686	2846	5346	10764	8964	8954
COQ5	Uncharacterized protein	231.098	767.523	0.301095	-1.73171	2.77781e-09	7.53609e-08	down	311	190	297	874	604	597
LOC101794177	uncharacterized LOC101794177	926.059	2735.58	0.338523	-1.56267	2.9555e-09	8.00193e-08	down	1145	847	1164	2781	2361	2154
RPL30	Uncharacterized protein	1356.66	3988.53	0.34014	-1.5558	3.00775e-09	8.127e-08	down	1548	1109	2051	4206	3248	3232
MRC2	Uncharacterized protein	305.576	5.51988	55.3591	5.79075	3.05264e-09	8.23168e-08	up	321	170	617	10	3	3
SKAP2	Uncharacterized protein	896.746	2644.75	0.339067	-1.56036	3.11012e-09	8.36984e-08	down	1138	738	1225	3048	1774	2348
ATP8A2	Phospholipid-translocating ATPase	92.915	3.55403	26.1436	4.70839	3.15224e-09	8.4662e-08	up	122	38	183	2	4	3
WHAMM	Uncharacterized protein	424.737	108.447	3.91654	1.96958	3.19111e-09	8.55137e-08	up	536	402	501	125	73	96
LOC101800942	Uncharacterized protein	199.056	44.8422	4.43903	2.15024	3.19671e-09	8.55137e-08	up	248	144	308	34	19	64
LOC101803527	tubulin beta-7 chain-like	496.205	1517.91	0.326901	-1.61308	3.30296e-09	8.81799e-08	down	714	333	706	1633	1385	1053
ST6GALNAC3	Uncharacterized protein	124.678	21.585	5.77615	2.53011	3.33657e-09	8.89001e-08	up	149	118	156	29	4	27
SLC2A10	Uncharacterized protein	145.138	542.668	0.267453	-1.90264	3.44047e-09	9.14865e-08	down	271	84	161	735	292	477
PKIA	Uncharacterized protein	179.79	6.33599	28.3761	4.8266	3.49572e-09	9.27716e-08	up	353	125	148	10	2	6
REEP5	Uncharacterized protein	344.192	1051.66	0.327285	-1.61138	3.59968e-09	9.53418e-08	down	424	343	390	1133	896	794
RAB3B	Ras-related protein Rab-3B	76.5759	3.37822	22.6675	4.50256	3.67296e-09	9.69604e-08	up	149	51	68	7	3	0
OPHN1	Uncharacterized protein	318.541	31.4764	10.12	3.33914	3.67526e-09	9.69604e-08	up	544	237	325	39	24	23
MYC	V-myc myelocytomatosis viral oncogene-like protein	156.545	585.685	0.267285	-1.90355	3.76523e-09	9.89959e-08	down	180	95	287	643	484	449
PPIF	Peptidyl-prolyl cis-trans isomerase	838.29	2486.42	0.337148	-1.56855	3.76719e-09	9.89959e-08	down	1208	719	945	2579	1981	2091
LOC101792536	Cell cycle control protein 50C	1018.97	305.968	3.33031	1.73566	3.78889e-09	9.93713e-08	up	1273	683	1658	402	150	293
BRIX1	Uncharacterized protein	130.33	561.039	0.232301	-2.10593	3.82133e-09	1.00026e-07	down	147	81	239	533	388	568
MAPK8	Mitogen-activated protein kinase	401.232	103.475	3.87756	1.95515	3.99984e-09	1.04495e-07	up	443	383	536	113	94	71
NPTX2	neuronal pentraxin II	487.848	24.5653	19.8592	4.31173	4.09973e-09	1.06896e-07	up	448	204	1160	37	17	15
WNT8B	Protein Wnt	149.238	19.7043	7.5739	2.92104	4.16465e-09	1.08378e-07	up	191	114	216	25	15	14
SMS	Uncharacterized protein	1602.17	4418.83	0.362579	-1.46363	4.228e-09	1.09813e-07	down	1870	1497	2083	5802	2999	3375
HID1	Uncharacterized protein	46.7419	5.05012	9.25561	3.21033	4.31007e-09	1.11728e-07	up	64	39	58	7	4	3
RCOR3	Uncharacterized protein	233.406	53.8758	4.33229	2.11513	4.37745e-09	1.13256e-07	up	333	193	278	76	34	40
FYN	Non-specific protein-tyrosine kinase	203.014	44.4163	4.57072	2.19242	4.47258e-09	1.15494e-07	up	299	211	164	43	34	41
WDR65	WD repeat domain 65	314.102	82.3645	3.81355	1.93114	4.62239e-09	1.19133e-07	up	379	249	465	93	79	50
LOC101792573	Uncharacterized protein	2839.82	204.986	13.8537	3.7922	4.77881e-09	1.22928e-07	up	3448	3202	2687	228	151	174
SLC16A1	Monocarboxylate transporter 1	1457.08	4297.59	0.339046	-1.56045	4.92693e-09	1.26496e-07	down	1489	1084	2557	4384	3746	3335
PGM2	Uncharacterized protein	200.115	648.926	0.308379	-1.69722	5.01045e-09	1.28394e-07	down	181	221	263	726	378	651
NRTN	Uncharacterized protein	155.157	26.9771	5.75146	2.52393	5.24444e-09	1.34134e-07	up	190	112	244	27	18	27
RIMS1	Uncharacterized protein	57.4544	0	Inf	20	5.50714e-09	1.4048e-07	up	109	30	67	0	0	0
SYTL2	Uncharacterized protein	807.718	2254.74	0.358232	-1.48104	5.51891e-09	1.4048e-07	down	1156	493	1233	3362	1269	1702
LOC101798450	Uncharacterized protein	52.2874	251.539	0.20787	-2.26625	5.52403e-09	1.4048e-07	down	68	39	76	298	206	179
LOC101799585	histone H2B 5-like	246.252	55.7715	4.41537	2.14253	5.56853e-09	1.41344e-07	up	241	188	436	54	48	46
LOC101802281	serine hydroxymethyltransferase, cytosolic-like	3231.39	1104.89	2.92463	1.54825	5.66768e-09	1.43588e-07	up	4110	2902	4023	1287	747	965
LOC101799639	Uncharacterized protein	121.356	449.36	0.270063	-1.88863	5.8097e-09	1.46909e-07	down	134	100	187	417	400	370
LOC101799830	Uncharacterized protein	118.53	443.555	0.267228	-1.90386	5.83617e-09	1.473e-07	down	127	109	169	516	355	331
RNF25	Uncharacterized protein	78.6798	312.623	0.251677	-1.99036	5.95044e-09	1.49902e-07	down	105	73	89	381	219	253
JAM3	Uncharacterized protein	41.2153	3.15259	13.0735	3.70857	6.03277e-09	1.51691e-07	up	55	59	14	2	5	1
SCRN1	Uncharacterized protein	32.7199	0	Inf	20	6.06722e-09	1.52271e-07	up	41	29	42	0	0	0
TXNRD1	Uncharacterized protein	344.249	2088.74	0.164812	-2.60111	6.21978e-09	1.55808e-07	down	522	298	356	2181	2174	1220
MRPS31	Uncharacterized protein	367.4	1117.87	0.328661	-1.60533	6.45898e-09	1.61499e-07	down	474	339	436	1316	853	866
LOC101800303	sorbin and SH3 domain-containing protein 1-like	1393.81	6076.86	0.229363	-2.1243	6.62962e-09	1.65315e-07	down	1675	924	2355	5867	5994	4236
URB2	Uncharacterized protein	92.416	381.165	0.242457	-2.0442	6.63628e-09	1.65315e-07	down	132	42	164	453	261	323
MAK16	Uncharacterized protein	176.111	629.414	0.279802	-1.83752	6.71724e-09	1.67021e-07	down	215	104	314	686	466	542
TSR1	Uncharacterized protein	175.1	612.161	0.286036	-1.80573	6.7552e-09	1.67654e-07	down	204	121	295	604	515	509
LOC101801540	26S proteasome non-ATPase regulatory subunit 7-like	915.358	2575.08	0.355468	-1.49221	6.89857e-09	1.70896e-07	down	1272	784	1084	3102	1994	1914
ND3	NADH-ubiquinone oxidoreductase chain 3	3896.65	11247.4	0.346449	-1.52928	7.0655e-09	1.74442e-07	down	4455	2410	7100	11609	7962	10531
SYNE2	Uncharacterized protein	5500.68	2004.02	2.74482	1.45671	7.06774e-09	1.74442e-07	up	6526	4336	8301	2191	1061	2157
CMBL	Carboxymethylenebutenolidase-like protein	39.5274	232.215	0.170219	-2.55454	7.11961e-09	1.75399e-07	down	48	48	32	325	172	148
ZNF622	Uncharacterized protein	465.393	1425.57	0.326461	-1.61502	7.17679e-09	1.76483e-07	down	501	379	738	1365	1188	1227
PTPN3	Tyrosine-protein phosphatase	188.43	657.741	0.286481	-1.80349	7.26605e-09	1.78351e-07	down	218	157	277	653	564	533
FRMPD4	Uncharacterized protein	59.6633	1.15501	51.656	5.69087	7.42013e-09	1.818e-07	up	75	41	95	1	2	0
LOC101789398	ankyrin repeat domain-containing protein 40-like	56.5184	257.727	0.219296	-2.18905	7.46028e-09	1.8245e-07	down	68	60	60	300	221	177
SRPK2	Uncharacterized protein	1219.46	421.963	2.88997	1.53105	7.92593e-09	1.93485e-07	up	1701	876	1702	457	214	467
UGDH	UDP-glucose 6-dehydrogenase	864.078	2398.55	0.360251	-1.47293	8.04995e-09	1.96012e-07	down	1112	767	1076	3042	1887	1642
ADARB1	Uncharacterized protein	881.057	142.675	6.17526	2.6265	8.05871e-09	1.96012e-07	up	930	573	1644	153	115	115
SMARCD3	Uncharacterized protein	379.645	90.9531	4.17408	2.06146	8.23447e-09	1.99925e-07	up	489	362	433	117	60	73
ACSL3	Uncharacterized protein	3651.08	1313.91	2.7788	1.47446	8.28619e-09	2.00816e-07	up	4306	3155	5102	1312	936	1256
B3GNT4	Uncharacterized protein	69.9918	4.24942	16.4709	4.04185	8.44703e-09	2.04345e-07	up	70	53	123	10	1	2
IQSEC3	Uncharacterized protein	37.9787	2.33866	16.2395	4.02144	8.50249e-09	2.05316e-07	up	63	37	27	5	1	1
ACTG1	actin, gamma 1	5561.54	15990	0.347813	-1.52362	8.67277e-09	2.09051e-07	down	6596	3023	10534	17161	12913	12853
NIPA1	Uncharacterized protein	714.61	228.799	3.12331	1.64308	8.97567e-09	2.15823e-07	up	793	718	894	222	206	179
NABP1	Uncharacterized protein	309.808	1253.01	0.247252	-2.01595	8.98591e-09	2.15823e-07	down	462	296	285	1450	1204	733
MYOM1	Uncharacterized protein	2647.45	479.435	5.52201	2.46519	9.11549e-09	2.18543e-07	up	3260	1759	4383	467	226	586
TMEM200A	Uncharacterized protein	102.776	1.88213	54.6061	5.77099	9.14395e-09	2.18834e-07	up	169	112	56	2	3	0
RALGAPA1	Uncharacterized protein	648.461	206.538	3.13967	1.65061	9.3441e-09	2.23226e-07	up	810	515	929	212	160	180
LOC101804481	gamma-aminobutyric acid type B receptor subunit 1-like	271.243	68.8528	3.93946	1.978	9.49533e-09	2.26435e-07	up	396	271	240	46	58	73
CCT4	T-complex protein 1 subunit delta	1155.78	3302.29	0.349994	-1.5146	9.6665e-09	2.30107e-07	down	1626	861	1550	3572	2639	2663
HEPH	Uncharacterized protein	10293.6	3710.44	2.77423	1.47209	9.98712e-09	2.37318e-07	up	15079	7985	12667	5093	2694	2493
GPR161	Uncharacterized protein	51.9278	5.10521	10.1715	3.34646	1.01636e-08	2.41084e-07	up	100	50	23	10	3	2
NLE1	Notchless protein-like protein 1	103.537	452.651	0.228734	-2.12826	1.03283e-08	2.44557e-07	down	186	54	132	634	317	307
MPPE1	Uncharacterized protein	289.039	70.6292	4.09235	2.03293	1.06577e-08	2.51913e-07	up	369	242	386	83	45	64
CYTH3	Uncharacterized protein	67.3922	5.99273	11.2457	3.4913	1.10224e-08	2.60073e-07	up	104	62	62	3	9	3
FTSJ3	Uncharacterized protein	792.081	2301.63	0.344139	-1.53894	1.15874e-08	2.72925e-07	down	1120	489	1215	2783	1673	1816
RPS13	Uncharacterized protein	1110.28	3163.27	0.350992	-1.51049	1.23111e-08	2.89462e-07	down	1306	908	1636	3169	2625	2633
SPATS2L	Uncharacterized protein	586.126	166.843	3.51303	1.81272	1.24705e-08	2.92372e-07	up	791	576	603	255	105	110
STARD13	Uncharacterized protein	100.721	403.619	0.249544	-2.00263	1.24907e-08	2.92372e-07	down	113	87	147	394	315	364
LOC101797022	transmembrane and TPR repeat-containing protein 1-like	138.63	6.0839	22.7864	4.5101	1.25003e-08	2.92372e-07	up	156	70	280	5	2	9
HOMER3	Uncharacterized protein	45.7975	2.89523	15.8183	3.98352	1.25424e-08	2.92846e-07	up	81	39	36	4	3	1
LOC101794886	GTP-binding protein	446.536	1311.83	0.340391	-1.55473	1.2581e-08	2.93235e-07	down	611	371	557	1441	1184	902
PPP3CC	Serine/threonine-protein phosphatase	57.3711	252.341	0.227356	-2.13698	1.2693e-08	2.95333e-07	down	70	50	77	265	198	213
ZZEF1	Uncharacterized protein	1327.3	3647.75	0.363868	-1.45851	1.27663e-08	2.96523e-07	down	2008	940	1706	4842	2755	2460
RNF43	Uncharacterized protein	79.1252	322.35	0.245464	-2.02642	1.28098e-08	2.97019e-07	down	98	77	92	328	241	292
WFIKKN1	WAP, follistatin/kazal, immunoglobulin, kunitz and netrin domain containing 1	55.486	209.738	0.26455	-1.91839	1.28445e-08	2.97309e-07	down	74	31	95	240	82	248
CLGN	Uncharacterized protein	42.9203	2.45411	17.4892	4.12839	1.3633e-08	3.15016e-07	up	65	54	18	4	1	2
ZC4H2	Uncharacterized protein	363.663	96.7318	3.7595	1.91054	1.36796e-08	3.15549e-07	up	500	341	390	123	79	63
LOC101793695	chromosome unknown open reading frame, human C12orf5	509.28	1474.44	0.345405	-1.53364	1.38643e-08	3.19261e-07	down	661	491	567	1536	1234	1174
LOC101802585	ATP-dependent RNA helicase DDX25-like	236.86	3.36499	70.3895	6.13729	1.39207e-08	3.20009e-07	up	424	206	174	7	2	1
HEATR1	Uncharacterized protein	502.878	1498.83	0.335513	-1.57556	1.41669e-08	3.2468e-07	down	786	294	717	1795	1075	1210
TFPI	Uncharacterized protein	135.147	805.393	0.167802	-2.57517	1.41723e-08	3.2468e-07	down	154	100	221	765	666	703
GAD1	Uncharacterized protein	36.167	0.299219	120.872	6.91733	1.43069e-08	3.27013e-07	up	51	31	42	1	0	0
WSB1	Uncharacterized protein	3577.29	1295.11	2.76215	1.46579	1.4323e-08	3.27013e-07	up	3978	3025	5361	1546	1024	951
LOC101791243	chromosome unknown open reading frame, human C14orf159	138.702	701.75	0.197652	-2.33896	1.44396e-08	3.29116e-07	down	144	58	312	723	458	698
LOC101802037	Uncharacterized protein	1018.74	2919.84	0.348903	-1.5191	1.45576e-08	3.31242e-07	down	1139	838	1557	2819	2578	2347
SLC25A6	Uncharacterized protein	7058.36	19091.6	0.36971	-1.43553	1.46178e-08	3.32048e-07	down	8072	6360	9724	19359	16756	14781
EHBP1	EH domain binding protein 1	298.725	888.865	0.336075	-1.57315	1.50215e-08	3.4064e-07	down	390	283	338	975	690	728
CMPK1	Uncharacterized protein	810.173	2309.16	0.350852	-1.51107	1.52055e-08	3.44229e-07	down	1033	641	1142	2482	2029	1684
B3GALT1	Uncharacterized protein	39.7041	0	Inf	20	1.52989e-08	3.45761e-07	up	54	38	42	0	0	0
SAMHD1	Uncharacterized protein	141.01	470.422	0.299753	-1.73815	1.54325e-08	3.48193e-07	down	182	171	103	449	422	375
LOC101790986	Uncharacterized protein	203.189	48.7659	4.16662	2.05888	1.56563e-08	3.52647e-07	up	182	162	367	43	18	68
C2CD2	Uncharacterized protein	1978.48	5512.13	0.358931	-1.47822	1.63065e-08	3.66677e-07	down	2593	1509	2802	5311	4343	4979
CHD5	Uncharacterized protein	136.819	25.3999	5.38657	2.42937	1.65189e-08	3.70832e-07	up	152	133	178	30	19	20
SERTM1	serine-rich and transmembrane domain containing 1	144.541	9.71729	14.8746	3.89478	1.70492e-08	3.82095e-07	up	217	76	229	7	12	6
NAA15	N(alpha)-acetyltransferase 15, NatA auxiliary subunit	1233.24	3383.69	0.364465	-1.45615	1.71039e-08	3.82342e-07	down	1575	1041	1633	3877	2552	2729
ITGA8	Uncharacterized protein	364.386	14.9887	24.3108	4.60352	1.71172e-08	3.82342e-07	up	666	280	311	13	24	2
LOC101794216	Transmembrane and TPR repeat-containing protein 1	1085.23	50.7069	21.402	4.41967	1.76556e-08	3.9371e-07	up	1170	530	2275	84	21	40
LOC101796721	Uncharacterized protein	257.675	820.212	0.314156	-1.67045	1.84968e-08	4.11785e-07	down	294	197	411	891	723	589
LOC101801953	uncharacterized LOC101801953	63.7473	1.32555	48.0911	5.5877	1.88071e-08	4.17999e-07	up	109	48	64	3	1	0
SAMD9	Uncharacterized protein	133.301	458.36	0.290821	-1.78179	1.90221e-08	4.22076e-07	down	140	150	150	562	371	317
NOP2	Uncharacterized protein	143.601	485.366	0.29586	-1.75701	1.92746e-08	4.26972e-07	down	210	114	173	638	380	318
DSCAM	Uncharacterized protein	82.7395	0	Inf	20	2.06039e-08	4.55667e-07	up	59	109	98	0	0	0
ELOVL2	Elongation of very long chain fatty acids protein	9.70403	122.547	0.0791863	-3.6586	2.1186e-08	4.67767e-07	down	12	9	12	182	69	93
LOC101792023	Uncharacterized protein	96.5065	363.89	0.265208	-1.9148	2.13623e-08	4.7014e-07	down	120	67	154	476	253	273
PLBD2	Uncharacterized protein	256.437	37.3606	6.86384	2.77902	2.13636e-08	4.7014e-07	up	242	186	479	28	28	41
PPA1	Uncharacterized protein	1194.35	3256.19	0.366794	-1.44696	2.17682e-08	4.78258e-07	down	1767	882	1521	4183	2512	2242
LOC101803306	mitogen-activated protein kinase kinase kinase MLT-like	629.246	186.179	3.37979	1.75693	2.18079e-08	4.78346e-07	up	660	437	1135	195	134	170
GPR39	Uncharacterized protein	76.2654	293.265	0.260056	-1.94311	2.19209e-08	4.80039e-07	down	83	78	95	323	193	275
ABHD6	Uncharacterized protein	45.3576	720.583	0.0629458	-3.98975	2.24379e-08	4.90479e-07	down	44	16	110	678	768	456
NMRK1	nicotinamide riboside kinase 1	978.606	313.717	3.11939	1.64126	2.24708e-08	4.90479e-07	up	996	843	1541	369	197	287
LOC101800765	chromosome unknown open reading frame, human C1orf198	623.154	177.721	3.50635	1.80997	2.31814e-08	5.05166e-07	up	764	467	952	191	118	169
LOC101794594	chromosome unknown open reading frame, human C7orf25	269.114	832.924	0.323096	-1.62997	2.3295e-08	5.06817e-07	down	358	238	324	870	623	738
PPP1R16B	Protein phosphatase 1 regulatory inhibitor subunit 16B	50.7973	1.6719	30.383	4.92519	2.37038e-08	5.14875e-07	up	48	59	60	0	1	3
MOSPD1	Uncharacterized protein	898.175	2475.43	0.362836	-1.46261	2.42455e-08	5.2579e-07	down	1098	809	1162	2695	1630	2343
LOC101795287	Uncharacterized protein	19.5674	124.307	0.157412	-2.66738	2.47333e-08	5.35501e-07	down	29	22	13	176	87	83
PTGFR	Prostaglandin F2-alpha receptor	88.6458	426.543	0.207824	-2.26657	2.49847e-08	5.40073e-07	down	150	71	84	461	219	470
NOP58	Uncharacterized protein	749.115	2103.92	0.356057	-1.48982	2.54446e-08	5.49127e-07	down	1012	545	1070	2477	1579	1657
SLC16A5	Uncharacterized protein	74.5405	425.864	0.175034	-2.5143	2.63491e-08	5.67398e-07	down	88	81	78	582	346	250
ME2	Malic enzyme	93.4996	18.9882	4.92409	2.29986	2.63758e-08	5.67398e-07	up	143	78	100	21	20	10
MDN1	Uncharacterized protein	1076.52	2942.04	0.365909	-1.45044	2.67736e-08	5.75032e-07	down	1595	731	1469	3741	1896	2439
TCP1	T-complex protein 1 subunit alpha	2358.67	6250.94	0.377331	-1.4061	2.8502e-08	6.10348e-07	down	3210	1957	2965	7234	4847	4853
SSRP1	Uncharacterized protein	244.393	749.369	0.326132	-1.61647	2.8509e-08	6.10348e-07	down	313	166	386	882	524	630
CLSTN3	Uncharacterized protein	211.175	52.7132	4.00611	2.0022	2.90274e-08	6.19526e-07	up	286	214	206	44	43	51
ATP5O	ATP synthase subunit O, mitochondrial	976.555	2672.82	0.365365	-1.45259	2.90302e-08	6.19526e-07	down	1190	927	1193	2703	2108	2320
GDF10	Bone morphogenetic protein 3b	186.383	5.49124	33.9419	5.08499	3.09236e-08	6.58884e-07	up	231	92	357	7	6	2
MANBA	Uncharacterized protein	456.602	142.523	3.2037	1.67974	3.20637e-08	6.82091e-07	up	446	373	771	144	119	117
TECR	Uncharacterized protein	204.224	41.3722	4.93626	2.30342	3.33693e-08	7.08741e-07	up	287	165	254	55	34	25
MRPS23	28S ribosomal protein S23, mitochondrial	178.095	573.668	0.310449	-1.68757	3.49165e-08	7.40428e-07	down	271	111	251	732	415	427
TKT	Uncharacterized protein	2877.08	7337.12	0.392127	-1.35061	3.68201e-08	7.79562e-07	down	3622	3103	2806	7952	6580	5166
CD82	Tetraspanin	1139.88	352.551	3.23324	1.69298	3.82088e-08	8.07152e-07	up	1315	1213	1266	414	234	310
CD81	Tetraspanin	937.438	309.883	3.02514	1.597	3.82437e-08	8.07152e-07	up	992	834	1394	370	198	276
PREP	Uncharacterized protein	841.597	2325.14	0.361955	-1.46612	3.91239e-08	8.24431e-07	down	1192	627	1120	2566	1995	1697
CCT6A	Uncharacterized protein	1484.43	4006.26	0.370528	-1.43234	3.91956e-08	8.24645e-07	down	2072	1155	1931	4326	3598	2827
URB1	Uncharacterized protein	312.83	914.238	0.342175	-1.54719	3.96585e-08	8.33078e-07	down	452	252	377	1175	686	649
DEK	Uncharacterized protein	256.402	780.138	0.328663	-1.60532	4.13886e-08	8.6806e-07	down	369	198	324	917	585	616
LOC101802736	C-factor	321.291	1893.21	0.169707	-2.55888	4.16945e-08	8.7311e-07	down	565	147	455	1879	1246	1924
MXRA5	Uncharacterized protein	391.565	5.34716	73.2286	6.19433	4.24521e-08	8.87586e-07	up	798	264	304	5	9	0
PDCD11	Uncharacterized protein	499.377	1391.17	0.358962	-1.4781	4.25777e-08	8.88826e-07	down	785	336	638	1896	996	959
FHL1	Uncharacterized protein	3188.36	323.978	9.84131	3.29885	4.39451e-08	9.15944e-07	up	4215	2401	4525	305	132	425
NRBP2	Uncharacterized protein	762.05	238.469	3.19559	1.67608	4.61519e-08	9.60447e-07	up	1066	631	929	333	119	212
LOC101803572	Uncharacterized protein	1494.46	239.213	6.24742	2.64326	4.78712e-08	9.94682e-07	up	1796	1363	1940	223	281	126
LOC101796579	ectoderm-neural cortex protein 1-like	63.9654	227.117	0.28164	-1.82807	4.91219e-08	1.01909e-06	down	73	47	105	217	192	193
LOC101803099	tubulin beta-5 chain-like	491.672	3375.02	0.14568	-2.77913	4.95913e-08	1.02646e-06	down	709	321	712	4517	1526	3305
FTH1	Ferritin	50145.6	125891	0.398326	-1.32798	4.96301e-08	1.02646e-06	down	34986	60258	69341	132742	102382	102162
FAM129A	Uncharacterized protein	94.7972	10.1421	9.3469	3.22449	4.97224e-08	1.02678e-06	up	146	99	69	17	6	6
THNSL1	Uncharacterized protein	556.235	176.296	3.15511	1.65769	5.11731e-08	1.05511e-06	up	592	534	762	185	146	141
LOC101794294	Uncharacterized protein	307.646	888.341	0.346315	-1.52984	5.15858e-08	1.06096e-06	down	404	239	428	968	652	771
RNF145	RING finger protein 145	253.099	73.5766	3.43994	1.78238	5.16164e-08	1.06096e-06	up	351	205	319	82	71	45
BTC	Uncharacterized protein	91.9059	12.6676	7.25519	2.85901	5.16941e-08	1.06096e-06	up	97	76	146	14	14	6
MAP3K14	Mitogen-activated protein kinase kinase kinase 14	781.777	264.637	2.95415	1.56274	5.25467e-08	1.07681e-06	up	967	649	1086	298	193	224
FCF1	Uncharacterized protein	134.358	465.876	0.288399	-1.79386	5.41355e-08	1.10767e-06	down	200	94	178	522	402	332
UCK2	Uncharacterized protein	87.0523	324.594	0.268188	-1.89868	5.55458e-08	1.13479e-06	down	100	52	161	347	263	261
SNX19	Uncharacterized protein	451.574	137.403	3.2865	1.71655	5.6311e-08	1.14868e-06	up	552	335	697	166	112	96
LOC101796874	Uncharacterized protein	44.8408	1.01311	44.2608	5.46796	5.67454e-08	1.15578e-06	up	57	37	61	2	0	1
NPAS3	Neuronal PAS domain-containing protein 3	59.3615	1.74022	34.1115	5.09219	5.77459e-08	1.17437e-06	up	74	53	76	3	1	1
CPA1	Uncharacterized protein	431.071	0	Inf	20	5.91249e-08	1.20059e-06	up	387	605	367	0	0	0
B4GALNT3	beta-1,4-N-acetyl-galactosaminyl transferase 3	59.0284	272.418	0.216683	-2.20634	6.05074e-08	1.22681e-06	down	41	60	99	251	277	190
TMEM164	Transmembrane protein 164	71.4636	8.76146	8.15659	3.02797	6.15195e-08	1.24545e-06	up	97	53	100	11	6	7
LIPG	Uncharacterized protein	88.3666	302.714	0.291915	-1.77638	6.19228e-08	1.25072e-06	down	112	79	111	341	218	259
SRGAP2	Uncharacterized protein	464.12	154.017	3.01344	1.59141	6.19668e-08	1.25072e-06	up	709	332	584	171	95	150
TLL1	Metalloendopeptidase	1097.82	369.534	2.97082	1.57086	6.24159e-08	1.25789e-06	up	1190	931	1674	533	174	327
STK39	Uncharacterized protein	94.46	17.2237	5.48431	2.45531	6.26786e-08	1.26129e-06	up	141	92	84	21	12	14
NAMPT	Uncharacterized protein	1339.44	3484.37	0.384415	-1.37926	6.28896e-08	1.26364e-06	down	1501	1258	1798	4036	2648	2758
AP1S3	Uncharacterized protein	13.5432	181.514	0.0746123	-3.74444	6.32672e-08	1.26932e-06	down	16	18	9	292	95	129
TRAF1	Uncharacterized protein	372.779	111.019	3.35779	1.74751	6.34532e-08	1.27056e-06	up	384	290	631	124	102	73
HTRA1	Uncharacterized protein	97.6225	13.927	7.00957	2.80933	6.35185e-08	1.27056e-06	up	151	78	108	17	10	11
RBM19	Putative RNA-binding protein 19	390.432	1163.25	0.33564	-1.57501	6.41978e-08	1.28223e-06	down	492	238	668	1172	989	939
LOC101790125	Uncharacterized protein	96.4334	18.5184	5.20743	2.38057	6.52112e-08	1.30054e-06	up	138	87	103	18	21	10
LOC101797448	CAD protein-like	5.79382	74.3155	0.0779624	-3.68108	6.70733e-08	1.33568e-06	down	8	3	10	85	59	57
LOC101805158	uncharacterized LOC101805158	199.956	623.222	0.320842	-1.64007	6.74553e-08	1.3413e-06	down	297	132	278	701	505	476
ECI2	Uncharacterized protein	418.98	127.583	3.28399	1.71545	6.77007e-08	1.34419e-06	up	510	356	578	155	120	72
ICA1	Uncharacterized protein	601.247	93.4211	6.43588	2.68614	7.07352e-08	1.40236e-06	up	834	579	613	114	95	45
ADAMTS14	Uncharacterized protein	47.2601	3.18122	14.8559	3.89297	7.15278e-08	1.41598e-06	up	47	57	50	5	2	2
LOC101800917	Uncharacterized protein	449.336	1258.11	0.357151	-1.48539	7.48281e-08	1.47912e-06	down	675	346	539	1461	1059	887
GPR1	Uncharacterized protein	252.37	61.0511	4.13376	2.04745	7.53832e-08	1.4879e-06	up	340	154	408	61	38	64
APP	Uncharacterized protein	15594	6198.12	2.51592	1.33108	7.57427e-08	1.4928e-06	up	16810	12900	24388	6734	4860	5073
ABLIM2	Uncharacterized protein	229.522	45.8828	5.00236	2.32261	7.63334e-08	1.50223e-06	up	268	235	266	58	25	43
LOC101800304	uncharacterized LOC101800304	47.3282	1.01311	46.716	5.54584	7.69845e-08	1.51282e-06	up	65	29	75	2	0	1
SOGA2	Uncharacterized protein	86.5445	4.15246	20.8417	4.3814	7.9626e-08	1.56244e-06	up	51	107	125	4	4	3
DNAAF2	Uncharacterized protein	8.10534	79.2417	0.102286	-3.28932	8.14171e-08	1.59525e-06	down	4	11	11	75	62	73
RAN	Uncharacterized protein	1604.61	4136.46	0.387917	-1.36618	8.23105e-08	1.6104e-06	down	2137	1292	2129	4977	3073	3213
LOC101797435	Uncharacterized protein	59.8416	249.484	0.239861	-2.05973	8.38004e-08	1.63716e-06	down	73	53	79	256	217	193
FOXN3	Uncharacterized protein	1470.1	487.019	3.01857	1.59386	8.5344e-08	1.66489e-06	up	1761	1518	1636	588	288	453
ABAT	Uncharacterized protein	2107.93	376.004	5.60614	2.48701	8.95705e-08	1.7448e-06	up	3319	1785	2111	452	207	367
UGT1A8	Uncharacterized protein	3.00377	339.164	0.0088564	-6.81906	9.23203e-08	1.79576e-06	down	3	5	1	365	393	149
NKRF	Uncharacterized protein	409.258	1173.39	0.348783	-1.5196	9.33608e-08	1.81299e-06	down	497	319	611	1211	936	990
PDE8B	Uncharacterized protein	83.1241	11.7399	7.08048	2.82385	9.34766e-08	1.81299e-06	up	99	56	140	10	3	18
GRIP1	Uncharacterized protein	52.655	3.66947	14.3495	3.84292	9.40844e-08	1.82214e-06	up	111	45	22	1	4	4
LOC101798394	uncharacterized LOC101798394	66.6129	5.3207	12.5196	3.64611	9.56547e-08	1.84988e-06	up	82	54	95	5	7	2
ASB2	Ankyrin repeat and SOCS box protein 2	5.04786	134.56	0.0375138	-4.73644	9.61374e-08	1.85653e-06	down	4	7	5	115	173	63
ARHGAP22	Uncharacterized protein	246.565	64.0792	3.84782	1.94404	1.03873e-07	2.00303e-06	up	293	217	336	76	53	45
SERBP1	Uncharacterized protein	1189.3	3090.7	0.384798	-1.37783	1.0542e-07	2.02994e-06	down	1446	986	1681	3516	2142	2706
ZNF804B	Uncharacterized protein	27.7605	0	Inf	20	1.05867e-07	2.03562e-06	up	40	24	31	0	0	0
CSRP1	Uncharacterized protein	205.823	55.2265	3.72688	1.89797	1.08373e-07	2.08083e-06	up	291	153	275	63	54	32
CORO2A	Coronin	19.5514	89.7805	0.217769	-2.19913	1.09087e-07	2.09153e-06	down	16	20	30	110	67	68
HNF4A	Uncharacterized protein	1202.04	444.152	2.70636	1.43635	1.11074e-07	2.12658e-06	up	1465	858	1913	444	336	404
PYGO1	Uncharacterized protein	242.387	62.0736	3.90483	1.96526	1.13243e-07	2.16502e-06	up	306	235	277	68	51	48
APMAP	Uncharacterized protein	1949.94	457.654	4.26073	2.0911	1.13564e-07	2.16808e-06	up	1650	2071	2814	369	326	501
NUDT16L1	Uncharacterized protein	309.588	905.561	0.341874	-1.54846	1.17048e-07	2.23141e-06	down	363	214	519	952	717	757
CERS6	Uncharacterized protein	60.9591	6.31479	9.65338	3.27103	1.17384e-07	2.23463e-06	up	92	62	49	3	2	11
KLHL8	Uncharacterized protein	394.24	115.325	3.41852	1.77337	1.20256e-07	2.28605e-06	up	482	371	485	118	93	97
VCAN	Uncharacterized protein	44.852	2.73792	16.3818	4.03402	1.22847e-07	2.332e-06	up	106	38	7	2	5	0
PDSS1	Uncharacterized protein	107.809	383.62	0.28103	-1.83121	1.2679e-07	2.40346e-06	down	144	70	169	408	336	284
HMGA2	Uncharacterized protein	38.9399	196.916	0.197749	-2.33826	1.27489e-07	2.41328e-06	down	51	26	61	213	131	186
LOC101801398		788.317	2082.1	0.378616	-1.40119	1.30154e-07	2.45772e-06	down	979	683	1046	2258	1749	1587
RPRD1A	Uncharacterized protein	282.591	80.1584	3.52541	1.81779	1.30203e-07	2.45772e-06	up	334	222	429	82	67	65
PLCE1	Phosphoinositide phospholipase C	90.0524	17.731	5.07882	2.34449	1.34386e-07	2.53311e-06	up	135	88	79	21	19	8
DMD	Uncharacterized protein	1873.66	401.88	4.66224	2.22102	1.34677e-07	2.53503e-06	up	1367	1666	3447	271	364	398
HSPH1	Uncharacterized protein	288.942	839.514	0.344178	-1.53877	1.39571e-07	2.62346e-06	down	420	165	452	988	709	580
KLF2	Uncharacterized protein	77.0799	602.953	0.127837	-2.96762	1.4118e-07	2.64998e-06	down	105	67	92	528	629	424
ANGPTL4	Uncharacterized protein	1356.52	487.323	2.78361	1.47695	1.41394e-07	2.6503e-06	up	1693	1174	1793	640	420	280
KBTBD11	kelch repeat and BTB (POZ) domain containing 11	39.7397	4.83771	8.21457	3.03818	1.41806e-07	2.6543e-06	up	52	28	60	2	7	3
CFI	Uncharacterized protein	106.727	369.377	0.288937	-1.79117	1.43382e-07	2.68006e-06	down	131	106	122	453	279	276
PHLDA2	Uncharacterized protein	321.319	869.723	0.36945	-1.43655	1.43858e-07	2.68521e-06	down	254	338	488	859	707	748
LOC101791535	uncharacterized LOC101791535	226.272	38.9679	5.80663	2.5377	1.50996e-07	2.81453e-06	up	370	175	238	61	30	19
LOC101797187	N-alpha-acetyltransferase 15, NatA auxiliary subunit-like	213.696	632.621	0.337795	-1.56578	1.53022e-07	2.84748e-06	down	304	170	266	750	452	518
GALK2	Uncharacterized protein	239.583	689.6	0.347423	-1.52523	1.53188e-07	2.84748e-06	down	274	256	267	671	559	602
PKP2	Uncharacterized protein	412.063	18.8167	21.8988	4.45278	1.53703e-07	2.8517e-06	up	910	291	224	32	9	13
LOC101803839	mucin-17-like	267.85	782.102	0.342474	-1.54593	1.53841e-07	2.8517e-06	down	240	207	494	728	620	721
CHPT1	Uncharacterized protein	53.741	8.00044	6.71725	2.74787	1.60625e-07	2.97334e-06	up	98	42	45	14	6	3
MCAM	melanoma cell adhesion molecule	371.281	130.005	2.8559	1.51394	1.6252e-07	3.00427e-06	up	543	209	582	178	65	118
AATF	Uncharacterized protein	77.8435	296.692	0.262372	-1.93032	1.6865e-07	3.11328e-06	down	108	51	117	277	270	237
FBXW4	Uncharacterized protein	147.803	455.43	0.324535	-1.62355	1.71156e-07	3.15521e-06	down	160	141	201	481	383	356
LOC101803109	regulator of G-protein signaling 9-like	36.1699	3.1129	11.6193	3.53846	1.71528e-07	3.15591e-06	up	31	37	54	2	2	4
LOC101800013	Uncharacterized protein	197.529	62.9216	3.13929	1.65044	1.71665e-07	3.15591e-06	up	369	176	122	96	46	35
CTSK	Uncharacterized protein	61.476	5.56701	11.0429	3.46505	1.72542e-07	3.16432e-06	up	79	48	87	6	3	6
LMNB1	Uncharacterized protein	172.146	44.6602	3.85458	1.94657	1.72595e-07	3.16432e-06	up	236	182	153	47	56	16
MGAT4A	Uncharacterized protein	144.335	433.152	0.333221	-1.58545	1.7572e-07	3.21656e-06	down	167	128	200	529	309	344
SPP1	Uncharacterized protein	5868.22	60.4851	97.0194	6.6002	1.75924e-07	3.21656e-06	up	8331	5846	5472	98	36	38
CUL2	Uncharacterized protein	618.423	1642.21	0.37658	-1.40897	1.77882e-07	3.24671e-06	down	784	468	910	1875	1264	1303
LSP1	Uncharacterized protein	2636.75	1050.24	2.51062	1.32804	1.78058e-07	3.24671e-06	up	4141	1725	3450	1394	653	853
LOC101801364	Uncharacterized protein	113.996	13.4286	8.48903	3.0856	1.81298e-07	3.3013e-06	up	142	133	97	11	14	10
LOC101801411	transcription initiation factor TFIID subunit 7-like	160.452	491.975	0.326138	-1.61644	1.91035e-07	3.47388e-06	down	214	141	194	561	427	341
SLC38A6	Uncharacterized protein	147.544	442.257	0.333616	-1.58374	1.97518e-07	3.5869e-06	down	236	142	117	541	381	283
LOC101790958	Uncharacterized protein	49.9585	210.925	0.236854	-2.07793	2.02092e-07	3.665e-06	down	71	45	54	232	196	139
BDH2	Uncharacterized protein	345.575	97.2831	3.55226	1.82874	2.04296e-07	3.69824e-06	up	444	310	426	129	79	60
RRAS2	Uncharacterized protein	776.586	2014.46	0.385506	-1.37518	2.04477e-07	3.69824e-06	down	955	565	1210	2248	1407	1784
LOC101797047	D-beta-hydroxybutyrate dehydrogenase, mitochondrial-like	337.993	19.7052	17.1525	4.10035	2.06084e-07	3.72228e-06	up	266	424	407	12	27	11
AOX1	Uncharacterized protein	3177.44	383.48	8.28581	3.05064	2.11129e-07	3.80828e-06	up	2575	3525	4471	283	363	346
DGAT2	Putative diacylglycerol O-acyltransferase homolog 2	972.056	59.5707	16.3177	4.02836	2.14622e-07	3.86608e-06	up	1671	526	1290	129	18	32
LOC101790072	notch-regulated ankyrin repeat-containing protein A-like	65.3694	317.554	0.205853	-2.28032	2.16348e-07	3.89194e-06	down	76	53	98	311	263	270
MARVELD3	MARVEL domain-containing protein 3	444.961	137.23	3.24245	1.69709	2.1814e-07	3.91551e-06	up	560	368	610	167	139	67
EFCAB5	Uncharacterized protein	52.8768	5.55378	9.52088	3.25109	2.18242e-07	3.91551e-06	up	49	56	72	6	2	7
NOV	nephroblastoma overexpressed	193.183	3.43858	56.1812	5.81202	2.25653e-07	4.04305e-06	up	310	228	86	3	4	2
SLC25A15	Uncharacterized protein	218.072	63.3414	3.4428	1.78358	2.27093e-07	4.06177e-06	up	290	213	231	54	56	56
ABCC4	Uncharacterized protein	194.377	832.828	0.233394	-2.09916	2.27304e-07	4.06177e-06	down	283	168	214	698	870	607
EDA	Uncharacterized protein	197.183	55.3564	3.56206	1.83271	2.28983e-07	4.08633e-06	up	178	234	234	43	46	55
SCAF11	Uncharacterized protein	1221.24	3050.51	0.400342	-1.3207	2.30433e-07	4.10674e-06	down	1665	1033	1501	3685	2240	2386
KPNB1	Uncharacterized protein	1589.89	4115.25	0.386342	-1.37205	2.31136e-07	4.11379e-06	down	1926	1073	2640	4389	3077	3582
SLC25A5	Uncharacterized protein	327.249	932.405	0.350973	-1.51057	2.32831e-07	4.13846e-06	down	427	220	512	939	846	698
FRZB	Uncharacterized protein	115.201	29.4449	3.91244	1.96807	2.34153e-07	4.15645e-06	up	164	109	116	42	22	18
NSFL1C	NSFL1 cofactor p47	625.768	1624.79	0.385137	-1.37656	2.35625e-07	4.17393e-06	down	771	565	801	1817	1228	1340
CTBP2	Uncharacterized protein	50.2377	1.01311	49.5878	5.63191	2.35761e-07	4.17393e-06	up	105	13	69	2	0	1
NUBPL	Uncharacterized protein	316.052	905.026	0.349219	-1.5178	2.41404e-07	4.26325e-06	down	411	229	470	1001	728	709
IQCB1	Uncharacterized protein	861.731	313.527	2.7485	1.45865	2.41442e-07	4.26325e-06	up	1102	652	1258	363	193	295
WDR12	Uncharacterized protein	368.033	984.636	0.373776	-1.41976	2.41784e-07	4.26367e-06	down	518	317	426	1213	791	683
KCTD6	Uncharacterized protein	867.75	166.585	5.20905	2.38102	2.55852e-07	4.50581e-06	up	1314	815	799	182	138	128
IGF2BP3	Uncharacterized protein	103.655	347.05	0.298674	-1.74336	2.56292e-07	4.50764e-06	down	108	103	139	303	260	350
RPN1	Dolichyl-diphosphooligosaccharide--protein glycosyltransferase subunit 1	2978.12	7342.7	0.405589	-1.30191	2.6087e-07	4.58215e-06	down	3471	2707	3996	7766	5974	5939
RAB3IP	RAB3A interacting protein	491.946	113.443	4.33649	2.11653	2.63935e-07	4.62991e-06	up	537	430	726	127	92	87
LOC101801482	phosphatidylserine synthase 2-like	478.947	1247.12	0.384042	-1.38067	2.65601e-07	4.65306e-06	down	594	524	465	1304	927	1110
STMN4	Stathmin	76.2298	1.12855	67.5464	6.07781	2.6635e-07	4.66008e-06	up	83	76	98	1	0	2
RAB39B	Uncharacterized protein	932.985	340.956	2.73638	1.45227	2.68159e-07	4.68561e-06	up	1209	949	963	329	277	299
LOC101797179	Uncharacterized protein	0.532998	56.6703	0.00940524	-6.73232	2.72303e-07	4.75184e-06	down	2	0	0	38	39	69
LOC101789548	Uncharacterized protein	2211.25	898.894	2.45997	1.29864	2.80879e-07	4.89026e-06	up	2463	1790	3435	848	810	720
KIAA0895	KIAA0895 ortholog	857.004	319.309	2.68393	1.42435	2.80965e-07	4.89026e-06	up	975	771	1188	335	229	292
LRP8	Low density lipoprotein receptor-related protein 8 transcript variant 1	34.1253	241.832	0.141112	-2.82509	2.83142e-07	4.91895e-06	down	34	38	41	178	243	204
NUDT5	Uncharacterized protein	1097.92	2708.38	0.40538	-1.30265	2.83348e-07	4.91895e-06	down	1504	1094	1082	3136	2086	2116
MFSD11	major facilitator superfamily domain containing 11	1207.5	447.552	2.69802	1.4319	2.85379e-07	4.94721e-06	up	1678	1101	1325	581	284	367
MMD	Uncharacterized protein	5341.25	17694.1	0.301866	-1.72802	2.85714e-07	4.94721e-06	down	5872	6423	5081	17392	16291	13310
MAPK11	Mitogen-activated protein kinase	255.93	63.7368	4.01542	2.00555	2.9494e-07	5.10037e-06	up	316	210	360	109	33	41
LOC101794848	Uncharacterized protein	178.238	45.5549	3.91258	1.96812	3.03095e-07	5.23291e-06	up	271	140	206	54	28	42
PCDH19	Uncharacterized protein	272.451	6.47571	42.0727	5.39481	3.03386e-07	5.23291e-06	up	378	119	503	6	9	2
CCDC68	coiled-coil domain containing 68	28.4383	2.82691	10.0598	3.33054	3.09223e-07	5.32675e-06	up	24	29	43	1	3	3
FUCA2	Uncharacterized protein	452.374	152.808	2.96042	1.5658	3.12937e-07	5.3838e-06	up	567	456	494	136	137	129
TCF7	Uncharacterized protein	269.346	80.338	3.35266	1.7453	3.23374e-07	5.55623e-06	up	351	209	378	72	56	84
RAB11FIP4	Uncharacterized protein	403.077	74.7175	5.39468	2.43154	3.24092e-07	5.56144e-06	up	715	273	425	96	60	49
LOC101795490	Uncharacterized protein	940.209	2467.48	0.38104	-1.39199	3.28789e-07	5.63482e-06	down	1236	615	1488	2485	1955	2140
EDEM1	alpha-1,2-Mannosidase	1215.33	3108.64	0.390951	-1.35494	3.33556e-07	5.70922e-06	down	1392	943	1911	3291	2193	2859
SLC25A32	Uncharacterized protein	136.458	416.014	0.328014	-1.60817	3.34342e-07	5.71537e-06	down	182	104	190	429	335	348
PDE10A	Uncharacterized protein	35.5638	6.46249	5.50311	2.46025	3.36168e-07	5.73926e-06	up	45	45	24	6	8	3
CMPK2	Uncharacterized protein	244.002	862.163	0.283012	-1.82106	3.36839e-07	5.74341e-06	down	180	185	497	941	569	813
AFMID	Uncharacterized protein	7.49945	150.145	0.049948	-4.32343	3.37361e-07	5.745e-06	down	14	2	12	145	171	81
SCN8A	Sodium channel protein	475.42	154.1	3.08514	1.62534	3.38861e-07	5.76321e-06	up	628	383	636	207	102	117
ARF4	ADP-ribosylation factor 4	1948.33	6164.62	0.316051	-1.66177	3.48469e-07	5.91335e-06	down	2331	1830	2457	5654	6224	4364
FBXL20	Uncharacterized protein	345.194	105.663	3.26692	1.70793	3.48571e-07	5.91335e-06	up	366	289	541	125	82	80
LOC101792138	Organic solute transporter subunit beta	12.7781	325.047	0.0393114	-4.66891	3.5389e-07	5.996e-06	down	21	12	10	349	158	369
MCM2	Uncharacterized protein	93.003	301.837	0.308123	-1.69842	3.54957e-07	5.999e-06	down	135	79	105	410	221	204
LOC101796388	protein CutA homolog	100.632	20.3573	4.9433	2.30548	3.54962e-07	5.999e-06	up	112	97	132	19	12	23
DBT	Uncharacterized protein	801.402	294.563	2.72065	1.44395	3.5664e-07	6.0187e-06	up	965	670	1134	263	269	243
SLMO2	Uncharacterized protein	735.209	1834.89	0.400683	-1.31947	3.57419e-07	6.0187e-06	down	947	702	837	2164	1456	1361
FBXL7	F-box/LRR-repeat protein 7	315.518	95.7158	3.2964	1.72089	3.57476e-07	6.0187e-06	up	423	243	433	125	51	88
LOC101792459	uncharacterized LOC101792459	306.107	69.2045	4.42322	2.1451	3.58175e-07	6.02292e-06	up	361	328	328	71	52	62
TMEM63C	Uncharacterized protein	21.8234	2.05267	10.6317	3.4103	3.61073e-07	6.06404e-06	up	40	19	15	4	2	0
RSL1D1	Uncharacterized protein	510.073	1331.9	0.382967	-1.38471	3.61714e-07	6.0672e-06	down	821	349	622	1688	938	1026
MAP3K4	Uncharacterized protein	671.639	240.289	2.79514	1.48292	3.65773e-07	6.12762e-06	up	818	537	979	230	204	203
LOC101801308	Uncharacterized protein	168.962	518.223	0.32604	-1.61688	3.71915e-07	6.22273e-06	down	259	204	81	608	345	455
PPP1R3B	Uncharacterized protein	2513.49	593.031	4.23837	2.08351	3.74715e-07	6.26176e-06	up	2326	2534	3627	718	440	458
ABCC9	Uncharacterized protein	524.557	40.5459	12.9374	3.69347	3.7866e-07	6.3198e-06	up	455	400	992	45	41	23
MRTO4	mRNA turnover 4 homolog (S. cerevisiae)	197.775	571.779	0.345894	-1.5316	3.88686e-07	6.47906e-06	down	258	146	289	710	425	428
SOX4	Uncharacterized protein	253.818	63.0989	4.02254	2.00811	3.90493e-07	6.49619e-06	up	287	183	425	48	48	68
PGBD5	piggyBac transposable element derived 5	22.2509	1.244	17.8865	4.1608	3.90734e-07	6.49619e-06	up	34	21	20	0	0	3
LOC101790444	glutamate carboxypeptidase 2-like	67.2887	1.15501	58.258	5.86439	3.91168e-07	6.49619e-06	up	82	71	71	1	2	0
LOC101801087	transmembrane protein 198-B-like	44.5033	1.31232	33.9118	5.08372	4.03802e-07	6.69771e-06	up	54	28	77	3	0	1
EED	Uncharacterized protein	150.236	448.576	0.334917	-1.57812	4.05576e-07	6.71883e-06	down	173	111	244	486	316	405
ANP32E	Uncharacterized protein	507.716	1333.26	0.380807	-1.39287	4.08868e-07	6.765e-06	down	647	403	714	1439	1031	1113
CHID1	Uncharacterized protein	511.003	110.009	4.64511	2.21571	4.09418e-07	6.76575e-06	up	408	510	815	101	107	82
GAMT	Guanidinoacetate N-methyltransferase	2103.14	595.267	3.5331	1.82093	4.11533e-07	6.79232e-06	up	2166	2225	2635	578	453	551
BMF	Bcl-2-modifying factor	310.222	96.6484	3.2098	1.68248	4.13718e-07	6.81998e-06	up	286	284	494	70	49	132
PGAM1	Uncharacterized protein	5141.06	12255	0.419507	-1.25323	4.1711e-07	6.86745e-06	down	5970	5012	6389	13099	9364	10439
RNF157	Uncharacterized protein	38.4801	1.01311	37.9824	5.24726	4.3161e-07	7.09748e-06	up	37	49	38	2	0	1
LOC101797488	D-dopachrome decarboxylase-like	1849.73	734.522	2.51827	1.33243	4.38264e-07	7.19324e-06	up	2078	1602	2690	710	565	676
LOC101804621	Ribonuclease inhibitor	1347.87	3401.41	0.396268	-1.33545	4.38508e-07	7.19324e-06	down	1725	1055	1911	3307	2992	2729
IGF2	Insulin-like growth factor 2	275.73	70.2247	3.9264	1.97321	4.41333e-07	7.23074e-06	up	330	232	390	93	39	62
LOC101792364	torsin-1B-like	39.6681	171.455	0.231361	-2.11178	4.4233e-07	7.23822e-06	down	58	39	36	199	153	112
TP53I11	tumor protein p53 inducible protein 11	59.3281	6.91375	8.58117	3.10117	4.51898e-07	7.38562e-06	up	60	65	72	16	4	1
ARHGAP11A	Uncharacterized protein	304.066	829.046	0.366766	-1.44707	4.5244e-07	7.38562e-06	down	451	222	390	1089	517	680
PRMT3	Uncharacterized protein	245.677	688.203	0.356983	-1.48607	4.58794e-07	7.48023e-06	down	293	237	301	697	649	487
RASSF6	Uncharacterized protein	69.157	225.066	0.307275	-1.7024	4.65053e-07	7.57308e-06	down	73	101	41	294	176	149
CLP1	Uncharacterized protein	102.765	351.78	0.292128	-1.77533	4.65654e-07	7.57366e-06	down	112	77	172	348	258	331
LRRK1	Uncharacterized protein	46.8849	8.5226	5.50125	2.45976	4.82208e-07	7.8334e-06	up	60	51	44	6	7	9
NOP16	NOP16 nucleolar protein	216.829	614.45	0.352884	-1.50273	4.87074e-07	7.90287e-06	down	268	179	303	698	474	489
FECH	Ferrochelatase	831.599	2589.56	0.321136	-1.63874	4.88275e-07	7.91276e-06	down	1119	662	1103	2714	1646	2588
KLHL24	kelch-like family member 24	1283.44	489.458	2.62217	1.39076	4.9052e-07	7.93956e-06	up	1517	1088	1823	623	339	381
TMEM9	Uncharacterized protein	27.4933	2.29679	11.9703	3.58138	4.96406e-07	8.02513e-06	up	45	25	23	2	3	1
DLGAP1	Uncharacterized protein	76.4459	401.859	0.19023	-2.39418	4.99901e-07	8.07189e-06	down	61	68	135	322	400	324
MLF1IP	Uncharacterized protein	144.88	31.316	4.62638	2.20988	5.05344e-07	8.14997e-06	up	214	98	199	47	19	22
LOC101792038	T-box transcription factor TBX3-like	191.917	50.4169	3.80661	1.92851	5.08979e-07	8.19871e-06	up	200	189	260	53	42	40
ARFRP1	ADP-ribosylation factor-related protein 1	588.686	1501.5	0.392064	-1.35084	5.27882e-07	8.493e-06	down	654	569	771	1511	1212	1280
LRRC43	leucine rich repeat containing 43	48.0239	1.98435	24.2013	4.59702	5.32127e-07	8.55104e-06	up	48	36	85	1	2	2
A2M	Uncharacterized protein	7.83898	64.3902	0.121742	-3.0381	5.49358e-07	8.81735e-06	down	3	18	0	79	40	57
APOB	Putative apolipoprotein B	105941	43935.2	2.41131	1.26982	5.50871e-07	8.83107e-06	up	131287	101752	125212	50257	34576	34009
CHKA	Uncharacterized protein	821.196	2026.31	0.405267	-1.30306	5.57486e-07	8.92643e-06	down	916	845	991	2134	1590	1706
WNK2	Uncharacterized protein	36.5792	0.713886	51.2395	5.67918	5.63987e-07	9.01976e-06	up	30	54	30	1	0	1
TM6SF1	transmembrane 6 superfamily member 1	47.4536	5.56701	8.52408	3.09154	5.67236e-07	9.0609e-06	up	62	60	30	6	3	6
MGME1	Uncharacterized protein C20orf72	72.6016	273.456	0.265497	-1.91323	5.68776e-07	9.07469e-06	down	93	44	123	279	255	195
KIAA0020	Uncharacterized protein	316.02	882.954	0.357913	-1.48232	5.76171e-07	9.18175e-06	down	379	203	545	904	658	798
CADPS2	Uncharacterized protein	36.2726	3.03932	11.9345	3.57706	5.79442e-07	9.21364e-06	up	59	29	37	6	0	3
ABL2	Non-specific protein-tyrosine kinase	2864.5	259.162	11.0529	3.46636	5.80139e-07	9.21364e-06	up	2418	2268	5357	275	174	247
RSL24D1	Uncharacterized protein	545.525	1400.08	0.389638	-1.35979	5.80235e-07	9.21364e-06	down	670	568	582	1351	1333	1026
CYSTM1	Uncharacterized protein	561.077	194.026	2.89177	1.53195	5.83885e-07	9.26063e-06	up	544	546	814	214	172	136
TICAM1	Uncharacterized protein	155.515	444.79	0.349636	-1.51607	5.85365e-07	9.27312e-06	down	184	166	167	487	352	358
PDGFA	Uncharacterized protein	231.024	87.0793	2.65303	1.40764	5.91917e-07	9.36585e-06	up	323	125	386	77	45	108
DIP2C	Uncharacterized protein	224.927	67.3044	3.34194	1.74069	5.94007e-07	9.38783e-06	up	326	178	275	87	48	50
QPCT	Uncharacterized protein	686.106	1692.57	0.405363	-1.30271	6.07265e-07	9.58607e-06	down	715	585	1072	1740	1636	1138
AGMAT	Uncharacterized protein	673.322	233.208	2.88721	1.52968	6.0981e-07	9.61491e-06	up	746	640	901	277	173	184
TGFB2	Uncharacterized protein	498.308	119.162	4.18178	2.06412	6.11412e-07	9.62884e-06	up	529	271	1010	114	66	137
STAU2	staufen double-stranded RNA binding protein 2	812.316	307.21	2.64417	1.40281	6.16368e-07	9.6955e-06	up	977	754	1033	345	248	236
EPHA1	Receptor protein-tyrosine kinase	730.774	1752.59	0.416967	-1.26199	6.19909e-07	9.73654e-06	down	1010	705	747	2191	1395	1206
DDX27	Uncharacterized protein	888.533	2206.12	0.402758	-1.31201	6.20741e-07	9.73654e-06	down	1265	682	1144	2598	1772	1617
FAM134B	Uncharacterized protein	626.945	218.969	2.86317	1.51762	6.21157e-07	9.73654e-06	up	870	575	684	295	100	212
LOC101791296	NADH-cytochrome b5 reductase 3-like	1497.12	580.749	2.57791	1.3662	6.31579e-07	9.88351e-06	up	2156	1372	1551	743	388	464
NUP210	Uncharacterized protein	123.93	462.968	0.267685	-1.90139	6.32502e-07	9.88351e-06	down	163	139	105	664	293	335
ANK2	Uncharacterized protein	145.378	3.6827	39.4758	5.3029	6.33451e-07	9.88351e-06	up	93	197	175	1	5	3
PSMD1	Uncharacterized protein	1911.32	4660.08	0.410148	-1.28578	6.33483e-07	9.88351e-06	down	2452	1581	2570	4944	4187	3350
EIF2AK3	Uncharacterized protein	1334.68	536.566	2.48745	1.31467	6.35225e-07	9.89565e-06	up	1578	956	2171	572	383	486
CAPSL	Calcyphosin-like protein	36.7554	1.69836	21.6418	4.43575	6.35738e-07	9.89565e-06	up	40	47	31	0	3	1
KLF12	Uncharacterized protein	676.738	234.742	2.8829	1.52752	6.37517e-07	9.91183e-06	up	855	619	831	280	127	233
LOC101799386	leucine-rich repeat and immunoglobulin-like domain-containing nogo receptor-interacting protein 1-like	38.7775	5.07658	7.63852	2.93329	6.46214e-07	1.00354e-05	up	70	33	29	7	6	1
LOC101795303	Uncharacterized protein	488085	50543	9.65684	3.27155	6.61189e-07	1.02561e-05	up	499174	322345	920172	56157	37136	43045
LOC101801322	uncharacterized LOC101801322	199.046	17.9006	11.1195	3.47502	6.82504e-07	1.05745e-05	up	320	149	223	36	6	11
LOC101790287	fibronectin type-III domain-containing protein 3a-like	918.373	2291.46	0.400781	-1.31911	6.90929e-07	1.06807e-05	down	1066	850	1213	2118	2153	1776
PNO1	Uncharacterized protein	449.369	1167.95	0.384749	-1.37801	6.90956e-07	1.06807e-05	down	568	384	594	1201	1065	851
CLDN2	Claudin	39.4579	168.167	0.234635	-2.09151	6.97989e-07	1.0777e-05	down	38	61	22	190	108	157
PPA2	Uncharacterized protein	213.011	592.206	0.359691	-1.47517	7.0577e-07	1.08846e-05	down	249	207	264	654	446	496
TMEM229B	Transmembrane protein C14orf83-like protein	237.746	61.7559	3.84976	1.94477	7.1956e-07	1.10845e-05	up	321	246	225	74	48	46
LOC101801113	uncharacterized LOC101801113	193.624	52.5062	3.68763	1.8827	7.41396e-07	1.14078e-05	up	206	216	218	67	40	37
VCL	Uncharacterized protein	2978.61	7408.92	0.40203	-1.31463	7.43916e-07	1.14334e-05	down	3532	1898	5204	7412	6104	6220
PIK3AP1	Uncharacterized protein	332.974	840.73	0.396053	-1.33623	7.51056e-07	1.153e-05	down	429	330	360	937	638	693
DENND6B	Uncharacterized protein	135.588	31.0925	4.36077	2.12458	7.57423e-07	1.16144e-05	up	181	105	186	45	16	26
MED12L	Uncharacterized protein	102.531	23.387	4.38409	2.13228	7.61588e-07	1.16588e-05	up	135	76	148	26	20	17
SHISA2	shisa homolog 2 (Xenopus laevis)	662.776	22.4655	29.5019	4.88273	7.62056e-07	1.16588e-05	up	1273	343	761	37	15	12
LOC101805383	Galectin	64.3848	2.90846	22.1371	4.46839	7.66214e-07	1.1709e-05	up	129	64	20	4	4	0
LOC101804959	neuferricin-like	58.3473	232.574	0.250876	-1.99495	7.78288e-07	1.188e-05	down	77	21	119	294	148	196
SLC5A9	Uncharacterized protein	376.297	2.6511	141.94	7.14914	7.99767e-07	1.21939e-05	up	775	191	382	6	2	0
MYO1B	Myosin-Ib	1567.64	3812.87	0.411145	-1.28228	8.11019e-07	1.23515e-05	down	1797	1377	2211	3986	3284	2930
TP53RK	Uncharacterized protein	73.9345	251.205	0.29432	-1.76454	8.12787e-07	1.23643e-05	down	98	65	90	321	162	207
LOC101797268	uncharacterized LOC101797268	8.08677	76.5096	0.105696	-3.242	8.16425e-07	1.24056e-05	down	9	5	15	77	61	66
SVIL	Uncharacterized protein	2116.2	827.797	2.55642	1.35413	8.27107e-07	1.25537e-05	up	2075	1532	3874	1024	639	598
LOC101804090	Uncharacterized protein	65.0696	5.83759	11.1467	3.47854	8.44101e-07	1.27971e-05	up	57	48	125	4	6	5
PRMT7	Protein arginine N-methyltransferase 7	92.4345	276.199	0.334667	-1.5792	8.51295e-07	1.28916e-05	down	133	84	97	351	213	193
HSPA9	Uncharacterized protein	4374.55	10401.1	0.420587	-1.24953	8.74357e-07	1.32259e-05	down	5426	3823	5760	10705	9446	7611
ADAMTS8	Uncharacterized protein	234.971	17.7326	13.2508	3.72801	8.90259e-07	1.34512e-05	up	188	166	482	13	12	21
USP35	Ubiquitin carboxyl-terminal hydrolase	105.45	20.4939	5.14541	2.36329	9.08421e-07	1.37089e-05	up	109	91	164	25	12	19
SURF6	Uncharacterized protein	512.295	1282.82	0.399349	-1.32428	9.09359e-07	1.37089e-05	down	707	440	610	1543	1135	809
FAH	Uncharacterized protein	1076.06	406.52	2.647	1.40436	9.29585e-07	1.39981e-05	up	1224	1010	1426	449	262	386
LOC101804868	Uncharacterized protein	118.993	25.0774	4.74506	2.24643	9.33694e-07	1.40433e-05	up	117	89	213	19	24	22
MPST	Sulfurtransferase	788.133	2132.27	0.369621	-1.43588	9.34685e-07	1.40433e-05	down	1023	636	1072	2805	1256	1822
JAG2	Delta-like protein	51.134	13.4573	3.79973	1.9259	9.41579e-07	1.41311e-05	up	51	26	110	14	11	11
ADAM28	Uncharacterized protein	155.313	387.192	0.401126	-1.31787	9.46481e-07	1.41887e-05	down	233	162	120	380	393	254
ZDHHC15	Palmitoyltransferase	672.321	255.036	2.63618	1.39845	9.49232e-07	1.42141e-05	up	917	596	783	235	234	204
ND2	NADH dehydrogenase subunit 2	10067.6	34632.5	0.290698	-1.7824	9.51832e-07	1.42371e-05	down	10981	6528	18437	31188	25478	34723
TSTA3	Uncharacterized protein	331.796	919.508	0.360841	-1.47056	9.80516e-07	1.46498e-05	down	447	225	501	877	866	691
CCDC149	coiled-coil domain containing 149	253.369	73.7841	3.43392	1.77986	9.97908e-07	1.48931e-05	up	326	217	328	70	76	49
RIPK2	Uncharacterized protein	226.573	601.162	0.376892	-1.40778	1.00405e-06	1.49625e-05	down	264	283	183	664	458	498
BID	Uncharacterized protein	2435.78	875.761	2.78134	1.47578	1.00479e-06	1.49625e-05	up	2313	2117	3984	1037	648	695
LOC101790332	ceramide synthase 4-like	418.02	42.3821	9.86312	3.30204	1.01674e-06	1.51235e-05	up	532	483	351	32	35	43
DEPTOR	Uncharacterized protein	797.516	132.428	6.02225	2.5903	1.01799e-06	1.51255e-05	up	815	908	905	176	74	116
SYNCRIP	Uncharacterized protein	1292.03	3154.98	0.409522	-1.28799	1.02248e-06	1.51753e-05	down	1740	923	1878	3431	2498	2555
SSPN	Uncharacterized protein	30.0188	0.598437	50.162	5.64852	1.02596e-06	1.52101e-05	up	35	30	36	2	0	0
SLC35F4	solute carrier family 35, member F4	61.3713	2.76655	22.1833	4.4714	1.08761e-06	1.61063e-05	up	63	37	121	5	2	1
LOC101793842	Uncharacterized protein	561.259	206.677	2.71563	1.44129	1.08934e-06	1.6114e-05	up	764	450	730	250	126	188
MFAP3L	microfibrillar-associated protein 3-like	54.4015	4.86635	11.1791	3.48274	1.10467e-06	1.63228e-05	up	79	56	46	5	4	4
ATP9A	Phospholipid-translocating ATPase	549.498	196.107	2.80204	1.48648	1.14693e-06	1.69285e-05	up	722	523	613	239	140	156
C8G	Uncharacterized protein	42.3764	585.928	0.0723236	-3.78939	1.16663e-06	1.72003e-05	down	12	55	71	384	593	524
LOC101805041	Uncharacterized protein	33.715	131.535	0.256319	-1.96399	1.18385e-06	1.74352e-05	down	43	27	47	102	113	127
KLHL23	kelch-like family member 23	1112.55	2665.09	0.417453	-1.26031	1.18951e-06	1.74993e-05	down	1499	928	1407	3026	2148	2027
EFR3B	EFR3 homolog B (S. cerevisiae)	84.1712	20.2608	4.15438	2.05463	1.28866e-06	1.89371e-05	up	112	60	124	24	17	14
ACE	Uncharacterized protein	126.027	3.37822	37.3058	5.22133	1.29253e-06	1.89731e-05	up	153	64	242	7	3	0
LOC101801384	SH2 domain-containing adapter protein F-like	82.4342	16.7561	4.91965	2.29856	1.30129e-06	1.90809e-05	up	78	80	122	21	8	17
tRNA-Asn		307.681	804.886	0.382267	-1.38735	1.34551e-06	1.97077e-05	down	281	307	453	869	689	603
CNBP	Cellular nucleic acid-binding protein	3331	7633.95	0.43634	-1.19648	1.3471e-06	1.97095e-05	down	4323	3121	3851	8575	6338	5682
LOC101798163	Uncharacterized protein	2194.78	5166.32	0.424824	-1.23506	1.3552e-06	1.97953e-05	down	2329	1934	3286	5563	4224	4086
FILIP1	filamin A interacting protein 1	1345.49	565.266	2.38028	1.25113	1.35699e-06	1.97953e-05	up	1681	811	2332	801	288	488
MAST2	Uncharacterized protein	674.9	263.533	2.56096	1.35669	1.3574e-06	1.97953e-05	up	904	586	823	316	204	197
ATP2A2	Sarcoplasmic/endoplasmic reticulum calcium ATPase 2	918.769	2198.13	0.417978	-1.2585	1.3822e-06	2.01351e-05	down	1282	784	1087	2384	1463	2071
NUP160	Uncharacterized protein	283.19	778.546	0.363742	-1.45901	1.39649e-06	2.03212e-05	down	366	168	482	747	611	708
PLEKHG1	Uncharacterized protein	35.1721	187.154	0.187931	-2.41173	1.40913e-06	2.04828e-05	down	47	28	47	159	207	123
WLS	Integral membrane protein GPR177	1563.96	244.81	6.38845	2.67546	1.43235e-06	2.07978e-05	up	2051	1806	1250	336	123	221
GPA33	Uncharacterized protein	12.1206	122.821	0.0986851	-3.34102	1.43792e-06	2.08561e-05	down	18	6	20	210	52	91
LOC101796832	Uncharacterized protein	28.2593	3.92901	7.19248	2.84649	1.46306e-06	2.11978e-05	up	34	37	19	2	1	7
MCCC1	Uncharacterized protein	381.06	127.147	2.99701	1.58352	1.4751e-06	2.13492e-05	up	533	293	500	142	99	102
PDE12	Uncharacterized protein	200.333	565.763	0.354093	-1.4978	1.50804e-06	2.18023e-05	down	270	152	277	603	447	468
SH3BP5	Uncharacterized protein	609.232	230.836	2.63924	1.40012	1.51581e-06	2.18911e-05	up	779	411	968	270	152	205
UHRF1BP1L	UHRF1 binding protein 1-like	361.452	909.788	0.397293	-1.33173	1.5286e-06	2.20393e-05	down	544	271	444	1011	611	834
DDX47	Uncharacterized protein	536.126	1382.77	0.387719	-1.36692	1.53042e-06	2.20393e-05	down	613	404	863	1266	1226	1156
DDX10	Uncharacterized protein	196.369	537.762	0.365161	-1.4534	1.53244e-06	2.20393e-05	down	269	168	237	618	436	401
LOC101804671	uncharacterized LOC101804671	402.081	137.338	2.92769	1.54976	1.53266e-06	2.20393e-05	up	467	365	542	153	119	98
LOC101799323	dedicator of cytokinesis protein 3-like	36.8598	1.75345	21.0213	4.39378	1.55507e-06	2.23377e-05	up	54	25	51	3	2	0
CHP1	Uncharacterized protein	889.015	2017.51	0.440649	-1.1823	1.56673e-06	2.24811e-05	down	1280	890	803	2511	1300	1712
RPL35A	Uncharacterized protein	1212.64	2899.04	0.41829	-1.25742	1.5685e-06	2.24824e-05	down	1405	1010	1781	3106	2382	2292
ISPD	Uncharacterized protein	238.545	73.1138	3.26266	1.70605	1.58505e-06	2.26954e-05	up	316	212	287	64	67	61
PSMC1	Uncharacterized protein	860.767	2036.69	0.42263	-1.24253	1.58934e-06	2.27325e-05	down	1148	741	1065	2432	1590	1516
LOC101798781	60S acidic ribosomal protein P0	2672.08	6333.92	0.421869	-1.24513	1.60323e-06	2.29067e-05	down	2798	2238	4224	6334	5083	5459
FBLIM1	Uncharacterized protein	31.4606	2.31002	13.6192	3.76757	1.62666e-06	2.32168e-05	up	20	28	61	2	4	0
CHL1	cell adhesion molecule with homology to L1CAM (close homolog of L1)	2461.69	598.472	4.11329	2.04029	1.65233e-06	2.3558e-05	up	2610	2635	2956	786	473	388
LOC101796078	ankyrin repeat and SAM domain-containing protein 6-like	47.9369	6.04203	7.9339	2.98803	1.66495e-06	2.37127e-05	up	37	56	65	2	4	9
RPL4	Uncharacterized protein	5556.91	12865.8	0.431915	-1.21118	1.67493e-06	2.38296e-05	down	6969	4400	7952	14508	10121	10114
LOC101794462	Uncharacterized protein	2696.24	6245.64	0.431699	-1.2119	1.68119e-06	2.38933e-05	down	3212	2276	3818	7133	5195	4554
ZMYND19	Zinc finger MYND domain-containing protein 19	115.381	355.143	0.324886	-1.622	1.69337e-06	2.40408e-05	down	148	93	159	393	278	286
SESN1	Uncharacterized protein	1653.35	648.189	2.55073	1.35091	1.69922e-06	2.40984e-05	up	1585	1530	2542	743	502	509
LOC101804878	uncharacterized LOC101804878	200.285	550.746	0.363661	-1.45933	1.7238e-06	2.44211e-05	down	231	160	306	668	412	421
EIF3B	Eukaryotic translation initiation factor 3 subunit B	3383.24	7945.58	0.425801	-1.23175	1.73907e-06	2.45912e-05	down	4355	2487	5023	8772	6287	6344
LOC101796068		131.877	33.8432	3.89671	1.96225	1.73947e-06	2.45912e-05	up	152	128	166	36	20	35
EIF2S2	Eukaryotic translation initiation factor 2 subunit 2	1812.94	4182.49	0.433459	-1.20603	1.76609e-06	2.49274e-05	down	2330	1753	2035	4465	3839	2903
METRNL	Uncharacterized protein	156.421	43.178	3.6227	1.85706	1.76698e-06	2.49274e-05	up	183	134	222	47	38	31
NT5E	Uncharacterized protein	309.087	761.368	0.405963	-1.30058	1.77578e-06	2.50253e-05	down	405	347	263	823	634	588
LOC101800008	neural cell adhesion molecule L1-like protein-like	996.926	282.198	3.53272	1.82078	1.77931e-06	2.50487e-05	up	1075	1039	1222	351	259	160
APBA1	Uncharacterized protein	192.088	54.5694	3.52007	1.8156	1.78875e-06	2.51551e-05	up	248	151	269	57	46	43
LOC101801088	semaphorin-3B-like	73.3878	10.1548	7.2269	2.85338	1.80882e-06	2.54106e-05	up	67	72	110	6	5	15
CEBPZ	Uncharacterized protein	356.604	914.189	0.390077	-1.35817	1.85338e-06	2.60094e-05	down	507	266	472	1047	725	701
SORD	Uncharacterized protein	1025.56	2405.07	0.426416	-1.22967	1.85663e-06	2.60278e-05	down	1225	1108	1068	2387	2118	1892
PLEKHA3	Uncharacterized protein	103.545	372.113	0.278261	-1.84549	1.90352e-06	2.66572e-05	down	132	94	127	387	380	226
PQLC1	PQ loop repeat containing 1	355.48	893.903	0.397672	-1.33035	1.92759e-06	2.69661e-05	down	544	320	343	921	819	646
PSMA3	Proteasome subunit alpha type	906.775	2127.12	0.426292	-1.23009	1.97854e-06	2.76501e-05	down	1126	866	1077	2328	1688	1708
LRPPRC	Uncharacterized protein	2075.12	4829.07	0.429715	-1.21855	2.0092e-06	2.80493e-05	down	2878	1721	2552	5207	3678	4093
LOC101794618	Uncharacterized protein	53.1716	9.14223	5.81604	2.54004	2.07405e-06	2.89245e-05	up	104	53	19	15	7	4
IL22RA1	Uncharacterized protein	76.4944	256.091	0.2987	-1.74323	2.08285e-06	2.90033e-05	down	96	64	104	323	110	271
LOC101796655	uncharacterized LOC101796655	103.263	1029.74	0.100281	-3.31788	2.08403e-06	2.90033e-05	down	108	67	194	768	787	1117
LOC101794704	Uncharacterized protein	91.2723	831.114	0.109819	-3.1868	2.08722e-06	2.90175e-05	down	59	134	93	644	614	906
PSMD2	proteasome (prosome, macropain) 26S subunit, non-ATPase, 2	1280.46	3051.81	0.419574	-1.253	2.15156e-06	2.98667e-05	down	1632	904	1977	3410	2352	2472
GPN3	Uncharacterized protein	200.161	553.468	0.361648	-1.46734	2.15275e-06	2.98667e-05	down	234	178	274	545	422	506
OBSL1	obscurin-like 1	25.2388	0.427896	58.9833	5.88224	2.16684e-06	3.0031e-05	up	20	7	69	0	1	0
SRM	Uncharacterized protein	210.001	562.932	0.373048	-1.42257	2.17e-06	3.00438e-05	down	288	167	273	660	417	451
SH2D4A	Uncharacterized protein	1142.02	435.076	2.62489	1.39225	2.17907e-06	3.01382e-05	up	1487	939	1521	594	238	375
SMARCA1	Uncharacterized protein	584.756	229.458	2.54842	1.34961	2.18467e-06	3.01845e-05	up	651	491	881	231	209	171
ANKRD10	ankyrin repeat domain 10	362.597	123.445	2.93733	1.5545	2.20479e-06	3.04267e-05	up	492	310	443	167	100	74
SH3TC2	Uncharacterized protein	427.92	166.727	2.56658	1.35985	2.20681e-06	3.04267e-05	up	396	419	637	116	137	177
LOC101805037	Uncharacterized protein	84.0494	14.885	5.64657	2.49737	2.20901e-06	3.04267e-05	up	99	101	73	16	11	13
LOC101789380	Uncharacterized protein	148.81	424.573	0.350494	-1.51254	2.25951e-06	3.10903e-05	down	199	103	223	552	300	316
FOXO4	Uncharacterized protein	516.36	196.441	2.62857	1.39428	2.29115e-06	3.14934e-05	up	613	419	760	234	153	147
LOC101800895	2'-5'-oligoadenylate synthase-like protein 2-like	171.556	520.559	0.329562	-1.60138	2.30521e-06	3.16541e-05	down	128	186	260	698	398	341
B4GALT6	Uncharacterized protein	68.368	6.84543	9.98739	3.32011	2.33719e-06	3.20604e-05	up	117	55	63	13	4	3
ASAP1	Uncharacterized protein	193.139	516.143	0.374198	-1.41813	2.38253e-06	3.26489e-05	down	231	171	260	511	407	456
PROX1	Uncharacterized protein	1039.13	416.238	2.49647	1.31989	2.4819e-06	3.3976e-05	up	1561	775	1286	507	249	381
LOC101803272	eukaryotic initiation factor 4A-I-like	760.517	1840.52	0.413207	-1.27506	2.49439e-06	3.4112e-05	down	1082	522	1077	2033	1585	1336
LOC101805065	Uncharacterized protein	92.1793	9.73796	9.46598	3.24275	2.54235e-06	3.47325e-05	up	46	72	208	3	10	11
TRNT1	Uncharacterized protein	313.686	783.843	0.40019	-1.32124	2.55855e-06	3.48967e-05	down	436	302	319	894	633	592
RPA2	Replication protein A 32 kDa subunit	323.106	809.458	0.399163	-1.32495	2.55957e-06	3.48967e-05	down	442	266	407	944	592	660
NOD1	Nucleotide-binding oligomerization domain containing 1	533.93	199.678	2.67396	1.41898	2.62538e-06	3.57574e-05	up	561	500	759	218	164	155
LOC101792873	Uncharacterized protein	3465.37	8050.08	0.430476	-1.21599	2.65669e-06	3.61472e-05	down	4053	2682	5370	8355	6441	6738
ANAPC5	Uncharacterized protein	339.873	859.022	0.395651	-1.3377	2.6733e-06	3.63362e-05	down	415	305	442	898	834	563
IPO7	Uncharacterized protein	6248.49	14014.2	0.445868	-1.16531	2.69329e-06	3.65709e-05	down	8042	5245	8254	16414	10349	11273
PRICKLE2	Uncharacterized protein	58.9342	13.4912	4.36835	2.12709	2.72325e-06	3.69402e-05	up	82	70	39	10	10	15
LOC101795379	Uncharacterized protein	136.805	3.12086	43.8356	5.45403	2.77597e-06	3.76173e-05	up	250	119	95	9	1	0
PITPNM3	Uncharacterized protein	77.0828	14.8564	5.18852	2.37532	2.78634e-06	3.77048e-05	up	85	80	93	13	14	12
TNFAIP3	Uncharacterized protein	83.5695	245.883	0.339875	-1.55692	2.78805e-06	3.77048e-05	down	98	96	80	294	151	225
LTV1	LTV1 homolog (S. cerevisiae)	335.12	838.772	0.399536	-1.3236	2.8182e-06	3.80741e-05	down	460	280	414	948	680	637
UHRF2	Uncharacterized protein	184.893	53.3444	3.46603	1.79329	2.87873e-06	3.88527e-05	up	213	145	287	61	51	32
PRKCE	Uncharacterized protein	73.5116	7.84839	9.36645	3.2275	2.90512e-06	3.91694e-05	up	68	50	144	5	10	5
PROSER2	proline and serine-rich protein 2	436.115	98.8539	4.41171	2.14134	2.9159e-06	3.92753e-05	up	532	472	441	111	72	84
LOC101802421	40S ribosomal protein S24	3018.42	6905.21	0.437122	-1.19389	3.0514e-06	4.10366e-05	down	3650	2480	4323	7378	5565	5586
CCT5	T-complex protein 1 subunit epsilon	1072.57	2482.11	0.432122	-1.21049	3.05279e-06	4.10366e-05	down	1476	858	1381	2906	1782	2050
WDR17	WD repeat domain 17	33.8383	2.15489	15.7031	3.97297	3.06578e-06	4.11699e-05	up	52	32	30	3	1	2
LOC101792818	Uncharacterized protein	1580.65	654.305	2.41578	1.27249	3.10259e-06	4.16225e-05	up	1575	1601	2149	705	570	481
TGFBI	Uncharacterized protein	406.152	20.3785	19.9305	4.3169	3.11632e-06	4.17649e-05	up	563	156	784	26	12	18
SSX2IP	Uncharacterized protein	131.268	377.984	0.347284	-1.52581	3.14422e-06	4.20968e-05	down	184	104	167	401	225	390
TFB2M	Dimethyladenosine transferase 2, mitochondrial	463.567	1164.11	0.398215	-1.32838	3.20895e-06	4.29205e-05	down	599	361	654	1147	899	1052
SULF1	Uncharacterized protein	332.805	127.529	2.60964	1.38385	3.24366e-06	4.33415e-05	up	510	394	172	180	52	124
HGD	Uncharacterized protein	2662.94	789.209	3.37419	1.75454	3.35707e-06	4.48122e-05	up	3410	2607	2952	1211	263	758
GNB2L1	Uncharacterized protein	2844.91	6695.25	0.424916	-1.23475	3.37358e-06	4.49878e-05	down	3184	2149	4645	6203	6020	5458
MAFK	Uncharacterized protein	128.997	365.06	0.353359	-1.5008	3.38807e-06	4.50998e-05	down	146	84	230	375	275	326
FHOD1	Uncharacterized protein	223.157	78.9343	2.82712	1.49933	3.38871e-06	4.50998e-05	up	274	186	311	73	84	51
ABCE1	ATP-binding cassette sub-family E member 1	1336.42	3026.33	0.441597	-1.1792	3.41212e-06	4.53663e-05	down	1789	1180	1600	3560	2362	2292
PEX1	Uncharacterized protein	1101.15	2450.47	0.449362	-1.15405	3.42666e-06	4.55145e-05	down	1326	1165	1174	2928	1557	2190
RNFT2	Uncharacterized protein	321.823	112.517	2.86023	1.51613	3.52758e-06	4.68086e-05	up	456	236	434	110	93	96
WNT4	Protein Wnt	40.8788	4.02379	10.1593	3.34473	3.55062e-06	4.70677e-05	up	44	44	48	5	3	3
LOC101801662	Uncharacterized protein	2407.5	5486	0.438844	-1.18822	3.55795e-06	4.71182e-05	down	2882	2075	3327	5707	4538	4429
SLC16A7	Uncharacterized protein	771.006	14.9512	51.5682	5.68841	3.61411e-06	4.78147e-05	up	896	1093	421	16	16	8
FNTA	Uncharacterized protein	328.18	1481.61	0.221503	-2.1746	3.68918e-06	4.87598e-05	down	373	221	572	1271	1030	1593
LOC101799374	Uncharacterized protein	210.823	1970.42	0.106994	-3.2244	3.70862e-06	4.88913e-05	down	250	118	394	2004	1089	2182
SERPINB12	Uncharacterized protein	29.8594	1.02633	29.0933	4.86262	3.70927e-06	4.88913e-05	up	30	26	47	2	1	0
PSMB2	Uncharacterized protein	733.805	1733.07	0.423414	-1.23986	3.71008e-06	4.88913e-05	down	934	657	916	1732	1681	1195
PWP1	Uncharacterized protein	414.23	1018.35	0.406766	-1.29773	3.72847e-06	4.90696e-05	down	658	299	490	1203	682	884
LAP3	Uncharacterized protein	357.653	882.363	0.405335	-1.30281	3.73093e-06	4.90696e-05	down	512	313	397	1038	717	639
KLF6	Uncharacterized protein	490.438	1169.46	0.419371	-1.2537	3.7486e-06	4.92537e-05	down	524	463	682	1176	992	948
RPS12	40S ribosomal protein S12	2830.57	6411.73	0.441468	-1.17962	3.85542e-06	5.05795e-05	down	3328	2466	3935	6657	5477	5007
CCNG2	Uncharacterized protein	818.405	328.677	2.48999	1.31614	3.85915e-06	5.05795e-05	up	919	832	997	355	234	295
LEPREL2	Uncharacterized protein	143.36	41.5268	3.45223	1.78753	3.86083e-06	5.05795e-05	up	152	130	209	43	35	33
CCDC47	Uncharacterized protein	398.99	991.973	0.402219	-1.31395	3.89086e-06	5.09232e-05	down	445	325	616	1083	838	746
PFDN1	Prefoldin subunit 1	379.32	935.83	0.40533	-1.30283	3.90896e-06	5.11101e-05	down	521	298	498	1060	719	750
LOC101799422	testis-expressed sequence 30 protein-like	286.412	93.4614	3.06449	1.61565	3.92514e-06	5.12716e-05	up	353	299	303	84	87	75
EPAS1	Uncharacterized protein	1392.13	3665.76	0.379766	-1.39682	3.93262e-06	5.13194e-05	down	1573	1749	1161	3736	3429	2606
AMY2A	Alpha-amylase	4226.71	1873.85	2.25563	1.17353	3.94612e-06	5.14454e-05	up	4770	3857	5815	1894	1700	1398
LOC101795032	Uncharacterized protein	81.5454	353.723	0.230535	-2.11694	4.01889e-06	5.23433e-05	down	80	91	99	329	239	369
SKP1	Uncharacterized protein	3501.12	1538.54	2.27562	1.18626	4.08722e-06	5.31815e-05	up	4336	3138	4494	1713	1229	1206
ELP2	elongator acetyltransferase complex subunit 2	99.7407	275.146	0.362501	-1.46394	4.10821e-06	5.34027e-05	down	132	97	107	325	220	202
OXSR1	Uncharacterized protein	852.545	2020.03	0.422046	-1.24453	4.16087e-06	5.40349e-05	down	1075	680	1206	1908	1870	1565
DNAJB4	Uncharacterized protein	2662.63	6184.11	0.43056	-1.21571	4.17912e-06	5.42194e-05	down	2976	1761	4745	6540	4709	5335
ZNF821	Uncharacterized protein	568.363	225.313	2.52255	1.33488	4.19099e-06	5.43207e-05	up	685	487	785	247	192	167
LOC101795938	myosin heavy chain, cardiac muscle isoform-like	2262.55	324.47	6.97309	2.8018	4.19714e-06	5.43479e-05	up	2498	1261	4435	355	104	419
MIPOL1	Uncharacterized protein	279.58	93.9611	2.97548	1.57312	4.22663e-06	5.46769e-05	up	395	265	284	106	66	82
ST3GAL4	Uncharacterized protein	58.1527	8.95628	6.49295	2.69887	4.27262e-06	5.52185e-05	up	74	48	79	10	12	2
RPL24	Uncharacterized protein	1445.29	3297.6	0.438284	-1.19006	4.28384e-06	5.53102e-05	down	1701	1288	1962	3416	2773	2626
G3BP1	Uncharacterized protein	1564.74	3549.71	0.440807	-1.18178	4.29688e-06	5.54252e-05	down	2124	1253	2044	4005	2740	2843
ELOVL5	Elongation of very long chain fatty acids protein	1260.1	4085.74	0.308414	-1.69706	4.33529e-06	5.58669e-05	down	1134	1848	945	3643	3458	3656
LOC101804320	uncharacterized LOC101804320	111.561	4.35164	25.6365	4.68013	4.35044e-06	5.60083e-05	up	143	135	83	9	0	4
FZD3	Frizzled-3	205.348	58.6941	3.49861	1.80678	4.37567e-06	5.62789e-05	up	250	132	350	98	26	44
GYG2	glycogenin 2	39.3138	123.168	0.319188	-1.64752	4.3893e-06	5.63959e-05	down	50	48	29	130	101	99
LOC101801648	Uncharacterized protein	300.435	53.2328	5.64379	2.49667	4.39317e-06	5.63959e-05	up	352	207	505	57	39	47
ZBTB21	Zinc finger protein 295	450.362	1090.69	0.412916	-1.27608	4.51123e-06	5.78559e-05	down	586	387	574	1128	919	868
KIAA1551	KIAA1551 ortholog	490.292	1172.25	0.418248	-1.25757	4.52187e-06	5.79371e-05	down	677	408	604	1287	1012	854
WEE1	Wee1-like protein kinase	66.5418	215.209	0.309196	-1.69341	4.55712e-06	5.83133e-05	down	82	57	90	202	164	204
HK1	Uncharacterized protein	250.616	91.0238	2.7533	1.46116	4.56282e-06	5.83133e-05	up	307	193	375	105	86	55
AFF1	Uncharacterized protein	1233.4	515.351	2.39332	1.25901	4.56429e-06	5.83133e-05	up	1590	1084	1550	573	418	398
SH3GLB2	Uncharacterized protein	231.024	72.2498	3.19758	1.67698	4.60317e-06	5.8754e-05	up	327	191	278	116	48	41
YBX3	Uncharacterized protein	2201.25	4985.37	0.441542	-1.17938	4.61061e-06	5.87929e-05	down	2821	1775	3035	5424	4096	3882
DNMT1	Uncharacterized protein	194.665	504.7	0.385705	-1.37443	4.63061e-06	5.89384e-05	down	253	165	252	540	422	392
BRCA1	Uncharacterized protein	169.891	37.1059	4.57855	2.19489	4.63081e-06	5.89384e-05	up	209	138	242	44	23	34
TOR3A	Uncharacterized protein	2358.18	255.13	9.24305	3.20837	4.65672e-06	5.9212e-05	up	1727	2022	4449	222	159	291
RBBP7	Uncharacterized protein	150.659	437.883	0.344063	-1.53925	4.6674e-06	5.92915e-05	down	195	106	230	386	359	407
TAF1B	Uncharacterized protein	68.9934	222.852	0.309593	-1.69156	4.69475e-06	5.95824e-05	down	94	64	76	234	206	156
LOC101801233	Uncharacterized protein	361.268	75.5976	4.77884	2.25666	4.72931e-06	5.99643e-05	up	727	331	153	93	69	44
OAT	Uncharacterized protein	9873.49	4461.19	2.2132	1.14613	4.74271e-06	6.00676e-05	up	11597	8280	14244	5024	3204	3827
PSAP	Uncharacterized protein	18199.3	8352.27	2.17896	1.12364	4.74642e-06	6.00676e-05	up	16377	16518	29635	8229	6901	7083
UPRT	uracil phosphoribosyltransferase (FUR1) homolog (S. cerevisiae)	84.9309	267.947	0.316969	-1.65759	4.77373e-06	6.03562e-05	down	147	61	88	266	258	188
LOC101800032	myosin light chain kinase, smooth muscle-like	21.4536	109.821	0.19535	-2.35587	4.83854e-06	6.11179e-05	down	15	23	34	98	98	93
DPP6	Uncharacterized protein	27.7808	0	Inf	20	4.92558e-06	6.21588e-05	up	23	35	32	0	0	0
SOD3	Superoxide dismutase [Cu-Zn]	47.0103	4.54067	10.3532	3.372	4.96974e-06	6.26571e-05	up	51	39	73	4	2	6
SLC39A10	Zinc transporter ZIP10	906.576	363.925	2.49111	1.31679	5.00578e-06	6.30521e-05	up	1268	714	1163	501	129	383
RGL1	Uncharacterized protein	1577.16	681.638	2.31377	1.21025	5.0249e-06	6.32335e-05	up	1899	1279	2294	770	445	629
ST8SIA6	Uncharacterized protein	2.48779	59.238	0.0419966	-4.57358	5.04515e-06	6.34288e-05	down	6	1	2	55	68	33
EVC	Uncharacterized protein	124.23	27.1503	4.57564	2.19397	5.11954e-06	6.43037e-05	up	174	103	151	43	14	20
ZHX1	Zinc fingers and homeoboxes protein 1	1365.62	589.198	2.31776	1.21273	5.18998e-06	6.51274e-05	up	1655	1080	2018	630	448	504
EFHC2	EF-hand domain (C-terminal) containing 2	123.209	36.5798	3.36821	1.75198	5.2596e-06	6.59393e-05	up	104	115	203	22	42	29
ADM	ADM	212.876	553.673	0.38448	-1.37902	5.27573e-06	6.60263e-05	down	199	228	284	572	485	422
LOC101805379	Uncharacterized protein	621.05	235.908	2.63259	1.39648	5.27639e-06	6.60263e-05	up	830	584	689	312	181	157
MRPL46	Uncharacterized protein	103.634	301.334	0.343918	-1.53986	5.38183e-06	6.7283e-05	down	129	109	107	322	230	257
RAB11FIP5	Uncharacterized protein	177.96	59.6984	2.98099	1.57579	5.46059e-06	6.8204e-05	up	217	143	258	53	54	50
LOC101803490	uncharacterized LOC101803490	31.3685	139.063	0.22557	-2.14835	5.4727e-06	6.82542e-05	down	43	21	47	140	136	94
LOC101803486	Uncharacterized protein	60.9439	7.97399	7.64284	2.93411	5.4748e-06	6.82542e-05	up	75	78	42	14	4	5
IGSF10	immunoglobulin superfamily, member 10	45.467	0.829335	54.8235	5.77672	5.50094e-06	6.84954e-05	up	28	45	82	0	0	2
LOC101799400	Uncharacterized protein	163.753	16.6878	9.81276	3.29466	5.50437e-06	6.84954e-05	up	123	179	245	18	8	19
LOC101803338	40S ribosomal protein S5-like	1295.74	3026.94	0.428069	-1.22408	5.57064e-06	6.92557e-05	down	1547	917	2109	3056	2492	2523
GRIA2	Uncharacterized protein	61.2303	0.713886	85.7704	6.42241	5.58989e-06	6.94243e-05	up	55	44	118	1	0	1
TAGLN2	Uncharacterized protein	206.859	524.608	0.394312	-1.34259	5.59456e-06	6.94243e-05	down	251	160	311	547	358	501
XBP1	X-box binding protein 1	2534.97	1106.24	2.29152	1.1963	5.60156e-06	6.94469e-05	up	2643	2350	3663	1246	899	841
FRAS1	Uncharacterized protein	65.1905	9.89001	6.59155	2.72062	5.61953e-06	6.96054e-05	up	84	49	95	12	6	9
PTPLB	protein tyrosine phosphatase-like (proline instead of catalytic arginine), member b	1251.31	2753.58	0.45443	-1.13787	5.65275e-06	6.99521e-05	down	1521	1201	1512	3273	1840	2380
CDK10	Uncharacterized protein	143.075	38.075	3.75771	1.90985	5.65937e-06	6.99694e-05	up	152	100	255	40	30	32
ABHD12B	abhydrolase domain containing 12B	104.136	23.101	4.50787	2.17245	5.7492e-06	7.10146e-05	up	97	106	148	25	21	16
PLA2G7	Uncharacterized protein	225.823	604.581	0.373519	-1.42075	5.7707e-06	7.12144e-05	down	276	166	351	622	538	454
GFM1	Uncharacterized protein	759.24	1765.35	0.43008	-1.21732	5.79642e-06	7.14661e-05	down	1072	593	971	1987	1331	1450
RPL37A	Uncharacterized protein	1416.29	3195.03	0.44328	-1.17371	5.81013e-06	7.15693e-05	down	1712	1144	2060	3602	2598	2425
TNFSF15	Uncharacterized protein	170.065	1255.95	0.135408	-2.88462	5.95491e-06	7.32854e-05	down	102	114	395	984	1278	1000
NUAK2	Uncharacterized protein	383.092	119.342	3.21004	1.68259	5.97442e-06	7.33939e-05	up	483	247	634	138	101	84
LOC101793487	Uncharacterized protein	181.693	43.5293	4.17405	2.06145	5.97469e-06	7.33939e-05	up	221	167	231	61	30	30
NOL12	Uncharacterized protein	211.165	1091.07	0.193539	-2.3693	6.01882e-06	7.38683e-05	down	354	167	207	1597	872	579
MKNK2	Uncharacterized protein	401.364	94.5119	4.24671	2.08635	6.09488e-06	7.47334e-05	up	370	316	720	101	64	89
GPX3	Glutathione peroxidase	18.1825	284.991	0.0638003	-3.97029	6.11303e-06	7.48874e-05	down	15	7	46	192	211	331
FAM78A	family with sequence similarity 78, member A	51.6636	6.06322	8.52082	3.09099	6.12086e-06	7.49149e-05	up	81	47	47	9	4	4
CACNA1C	Uncharacterized protein	51.7534	7.96384	6.49855	2.70012	6.13046e-06	7.49638e-05	up	72	33	79	4	10	6
LOC101794184	Histone H2A	112.171	22.1769	5.05802	2.33857	6.15539e-06	7.52001e-05	up	95	112	173	22	19	18
LOC101792641	diacylglycerol O-acyltransferase 2-like	586.074	216.061	2.71254	1.43965	6.32572e-06	7.72106e-05	up	639	549	808	272	181	138
LOC101804170	uncharacterized LOC101804170	274.033	671.196	0.408276	-1.29238	6.4017e-06	7.80491e-05	down	391	223	332	806	440	583
UBA5	Uncharacterized protein	451.04	1057.67	0.426448	-1.22956	6.40606e-06	7.80491e-05	down	687	325	566	1404	863	647
DHFR	Uncharacterized protein	141.915	406.751	0.348899	-1.51912	6.41526e-06	7.80903e-05	down	187	105	205	382	353	341
MLXIP	Uncharacterized protein	2078.61	689.419	3.01501	1.59216	6.45515e-06	7.85045e-05	up	2308	1447	3607	882	506	504
TLDC2	TBC/LysM-associated domain containing 2	79.3754	241.198	0.329088	-1.60346	6.4636e-06	7.8536e-05	down	90	92	78	217	222	196
NHS	Uncharacterized protein	140.852	17.1306	8.22227	3.03954	6.52844e-06	7.92519e-05	up	149	48	331	10	3	31
ITFG2	Integrin-alpha FG-GAP repeat-containing protein 2	542.464	213.084	2.54577	1.3481	6.66264e-06	8.07715e-05	up	686	506	650	218	143	209
DDIT4	DNA-damage-inducible transcript 4	294.536	25.3316	11.6272	3.53943	6.66566e-06	8.07715e-05	up	328	158	584	27	19	22
EAF1	Uncharacterized protein	251.718	622.405	0.404428	-1.30605	6.69668e-06	8.1074e-05	down	313	228	318	708	473	502
GPR158	Uncharacterized protein	34.8007	5.73755	6.06543	2.60061	6.74575e-06	8.15944e-05	up	34	34	50	8	2	6
PAM	Uncharacterized protein	2746.38	1230.96	2.23108	1.15774	6.76203e-06	8.17175e-05	up	3124	2545	3691	1252	725	1317
NOC2L	Uncharacterized protein	336.508	843.599	0.398895	-1.32592	6.91966e-06	8.35471e-05	down	444	248	487	835	717	692
DLC1	Uncharacterized protein	984.879	383.915	2.56536	1.35916	6.93359e-06	8.3587e-05	up	1122	735	1601	439	190	413
LOC101799930	A-kinase anchor protein 17B-like	1525.56	681.346	2.23904	1.16288	6.93544e-06	8.3587e-05	up	2090	1190	2022	647	572	586
RPS27A	Uncharacterized protein	2266.62	5122.36	0.442494	-1.17627	6.95557e-06	8.37543e-05	down	2651	1841	3376	5046	4257	4319
MOV10	Uncharacterized protein	466.374	1104.34	0.422309	-1.24363	6.96299e-06	8.37684e-05	down	488	419	693	1182	918	863
COL4A1	Uncharacterized protein	1365.64	210.629	6.48364	2.69681	7.01116e-06	8.42723e-05	up	1668	1285	1682	274	258	44
GC	Uncharacterized protein	811.112	3268.78	0.248139	-2.01078	7.11555e-06	8.54504e-05	down	1066	710	1002	2639	3123	2756
TSNARE1	Uncharacterized protein	30.6396	1.74022	17.6067	4.13806	7.20526e-06	8.64503e-05	up	44	21	43	3	1	1
LOC101792311	Uncharacterized protein	1236.25	465.315	2.6568	1.40969	7.24854e-06	8.68917e-05	up	1578	1270	1282	536	325	400
LOC101796773	Uncharacterized protein	332.243	69.5659	4.77594	2.25579	7.27416e-06	8.71124e-05	up	305	251	614	95	38	60
ENOPH1	Uncharacterized protein	179.724	458.124	0.392303	-1.34996	7.28294e-06	8.71124e-05	down	194	160	263	518	314	407
CDKL1	Uncharacterized protein	55.0598	8.86368	6.21184	2.63502	7.28645e-06	8.71124e-05	up	72	37	86	10	5	9
F7	Uncharacterized protein	327.865	104.954	3.12388	1.64334	7.29753e-06	8.71671e-05	up	351	316	445	135	53	101
MTMR14	Uncharacterized protein	345.47	851.05	0.405934	-1.30068	7.3464e-06	8.76728e-05	down	420	272	511	947	659	689
ADI1	Uncharacterized protein	542.394	214.985	2.52294	1.3351	7.3595e-06	8.77509e-05	up	670	448	758	213	149	211
UBE2QL1	ubiquitin-conjugating enzyme E2Q family-like 1	18.928	1.45423	13.0158	3.70219	7.3684e-06	8.77509e-05	up	25	18	21	2	2	0
MAN2A2	Uncharacterized protein	166.137	53.1884	3.12356	1.64319	7.37259e-06	8.77509e-05	up	232	114	240	75	36	37
SPAG16	sperm associated antigen 16	17.2219	0	Inf	20	7.43675e-06	8.84359e-05	up	21	10	31	0	0	0
KLHDC1	Uncharacterized protein	140.106	528.19	0.265257	-1.91454	7.54344e-06	8.96251e-05	down	155	105	232	430	360	592
THBS3	Uncharacterized protein	25.2731	0.842564	29.9954	4.90667	7.65912e-06	9.0919e-05	up	32	25	28	0	1	1
PPP2R3A	Uncharacterized protein	473.05	193.969	2.43878	1.28616	7.68558e-06	9.11523e-05	up	540	386	716	207	138	176
LOC101803414	Acetyltransferase component of pyruvate dehydrogenase complex	657.37	2599.57	0.252876	-1.9835	7.76652e-06	9.19971e-05	down	797	595	853	2515	2704	1664
WBSCR22	Uncharacterized protein	370.23	895.802	0.413295	-1.27476	7.77053e-06	9.19971e-05	down	437	304	542	1001	689	727
RNF2	Uncharacterized protein	115.116	27.7056	4.15498	2.05484	7.86555e-06	9.30399e-05	up	139	129	111	26	33	14
PROS1	Uncharacterized protein	4894.56	2221.53	2.20323	1.13962	7.89938e-06	9.33575e-05	up	5697	4583	6365	2428	1861	1685
PFDN5	Uncharacterized protein	297.821	740.198	0.402353	-1.31346	7.95727e-06	9.39589e-05	down	363	231	445	783	534	669
DNAH10	Uncharacterized protein	73.6675	10.3157	7.14128	2.83618	8.00395e-06	9.43732e-05	up	101	68	81	9	12	6
ADAM8	Uncharacterized protein	92.824	273.907	0.338889	-1.56112	8.00718e-06	9.43732e-05	down	145	87	81	295	178	264
UTP3	Uncharacterized protein	180.221	577.135	0.312269	-1.67914	8.01348e-06	9.43732e-05	down	196	179	233	521	591	406
RAB21	Uncharacterized protein	937.287	2094.03	0.447599	-1.15972	8.12585e-06	9.56125e-05	down	1195	869	1121	2236	1769	1611
UST	Uronyl 2-sulfotransferase	178.626	28.4362	6.28163	2.65114	8.14117e-06	9.57087e-05	up	285	85	279	46	12	23
NRF1	Uncharacterized protein	261.98	41.8732	6.25652	2.64536	8.22519e-06	9.66117e-05	up	262	170	505	40	35	36
ARAP2	Uncharacterized protein	17.8788	2.33866	7.64492	2.9345	8.29352e-06	9.7329e-05	up	28	19	12	5	1	1
CNTLN	Uncharacterized protein	103.568	12.4288	8.33294	3.05883	8.31247e-06	9.74661e-05	up	87	77	202	9	15	8
MYOM3	Uncharacterized protein	19.105	59.9164	0.318862	-1.649	8.32554e-06	9.7534e-05	down	29	10	30	80	24	62
ZFC3H1	Uncharacterized protein	2101.7	957.068	2.19597	1.13486	8.34857e-06	9.76449e-05	up	2369	1775	3119	940	807	797
LRRC49	leucine rich repeat containing 49	47.8432	7.97399	5.99991	2.58494	8.34958e-06	9.76449e-05	up	70	39	56	14	4	5
LOC101789381	carboxypeptidase A1-like	40.8554	0	Inf	20	8.39196e-06	9.8055e-05	up	83	25	36	0	0	0
CISH	Uncharacterized protein	213.228	625.289	0.341007	-1.55213	8.41943e-06	9.82902e-05	down	221	191	320	592	525	539
ATP13A3	Uncharacterized protein	2097.53	4615.66	0.454437	-1.13785	8.43503e-06	9.83866e-05	down	2544	1689	3050	5312	3383	3807
SCG2	Secretogranin-2	10.6646	57.4034	0.185784	-2.4283	8.5424e-06	9.95524e-05	down	8	18	6	78	36	45
DNAH7	Uncharacterized protein	550.155	214.997	2.55889	1.35552	8.61032e-06	0.000100257	up	846	395	684	297	68	234
OSBPL6	Oxysterol-binding protein	78.5327	14.3497	5.47279	2.45228	8.63143e-06	0.000100415	up	139	59	74	24	9	8
BET1	Uncharacterized protein	368.167	869.896	0.423231	-1.24048	8.63909e-06	0.000100417	down	459	369	408	934	685	717
UHRF1BP1	Uncharacterized protein	638.81	274.021	2.33125	1.2211	8.67296e-06	0.000100724	up	793	458	998	279	235	217
MRPL30	Uncharacterized protein	80.2992	245.924	0.326521	-1.61475	8.76583e-06	0.000101714	down	92	79	100	263	197	200
EPM2A	Uncharacterized protein	50.3155	4.40982	11.4099	3.51221	8.84197e-06	0.000102509	up	61	54	52	2	6	3
BMS1	Uncharacterized protein	1090.15	2486.23	0.438476	-1.18943	8.95985e-06	0.000103786	down	1368	792	1671	2646	1893	2133
WDR19	Uncharacterized protein	225.645	76.3713	2.95458	1.56295	8.98397e-06	0.000103975	up	282	213	270	79	68	57
PPT1	Uncharacterized protein	279.689	99.9993	2.79691	1.48383	9.04555e-06	0.000104597	up	367	222	382	113	82	75
CAMK1D	Uncharacterized protein	463.325	173.225	2.6747	1.41938	9.14826e-06	0.000105694	up	543	347	735	210	132	130
PSMD3	Uncharacterized protein	711.765	1625.11	0.43798	-1.19106	9.26166e-06	0.000106912	down	908	549	1025	1793	1356	1226
SLX4	Uncharacterized protein	228.578	558.808	0.409045	-1.28967	9.35875e-06	0.00010794	down	283	202	298	718	392	425
LOC101790113	Reticulon	248.984	0.427896	581.879	9.18458	9.36871e-06	0.000107962	up	386	9	573	0	1	0
LOC101796347	Uncharacterized protein	71.6595	13.8587	5.17072	2.37037	9.43391e-06	0.00010862	up	94	53	104	14	10	13
GPX7	Glutathione peroxidase	20.5985	1.45423	14.1645	3.82421	9.6937e-06	0.000111515	up	27	12	35	2	2	0
EIF2S1	Uncharacterized protein	946.851	2096.88	0.451551	-1.14704	9.78867e-06	0.000112511	down	1310	775	1184	2509	1640	1554
PSMD6	proteasome (prosome, macropain) 26S subunit, non-ATPase, 6	413.57	981.149	0.421516	-1.24634	9.83073e-06	0.000112898	down	552	318	571	1053	761	821
LRRFIP2	Uncharacterized protein	1151.43	2584.54	0.445507	-1.16648	9.86282e-06	0.000113169	down	1585	951	1435	2598	2198	2090
MAPK12	Mitogen-activated protein kinase	376.034	118.494	3.17345	1.66605	9.96145e-06	0.000114203	up	512	388	353	145	98	80
CACNA1H	Uncharacterized protein	25.7514	3.7378	6.88947	2.78439	1.00099e-05	0.00011466	up	43	20	26	4	4	2
UMODL1	Uncharacterized protein	9.81128	399.707	0.0245462	-5.34836	1.0021e-05	0.000114689	down	8	12	12	215	526	266
LOC101801600	Uncharacterized protein	2935.84	965.826	3.03972	1.60394	1.0159e-05	0.000116169	up	2814	2486	4877	1058	430	1122
HABP4	Uncharacterized protein	152.155	46.3395	3.28349	1.71523	1.02389e-05	0.000116984	up	181	155	174	43	54	25
F8	Uncharacterized protein	3.99889	57.8462	0.0691298	-3.85455	1.05521e-05	0.000120445	down	5	3	6	70	31	57
SH3GL2	Uncharacterized protein	54.896	3.60912	15.2104	3.92698	1.05598e-05	0.000120445	up	101	41	48	5	3	2
SCN2A	Sodium channel protein	50.8131	4.65612	10.9132	3.448	1.05736e-05	0.0001205	up	61	47	65	3	2	7
LOC101802274	Uncharacterized protein	96752.5	12798.7	7.55953	2.9183	1.06453e-05	0.000121134	up	96895	53793	200486	13020	4137	17201
CTPS1	CTP synthase	362.624	857.245	0.42301	-1.24124	1.06473e-05	0.000121134	down	552	252	470	1032	678	623
ALDH4A1	Uncharacterized protein	891.58	2087.59	0.427086	-1.2274	1.06791e-05	0.000121342	down	1331	606	1205	1983	1958	1583
LOC101797225	chromosome unknown open reading frame, human C4orf29	257.282	82.8108	3.10687	1.63546	1.06838e-05	0.000121342	up	308	238	330	104	52	71
HMOX2	Uncharacterized protein	1205.79	513.907	2.34633	1.2304	1.07051e-05	0.000121481	up	1436	993	1747	570	314	504
SNX8	Uncharacterized protein	352.674	144.7	2.43728	1.28527	1.07733e-05	0.000122152	up	391	286	549	165	122	104
LOC101789453	Histone H2A	82.9347	9.00558	9.20926	3.20308	1.08392e-05	0.000122748	up	58	86	136	9	7	8
PFKL	Uncharacterized protein	580.965	1300.97	0.446563	-1.16306	1.08442e-05	0.000122748	down	692	517	781	1451	1171	882
RPL13	Uncharacterized protein	1444.64	3198.74	0.451626	-1.1468	1.08643e-05	0.000122872	down	1771	1119	2150	3595	2567	2471
LRRC16A	leucine rich repeat containing 16A	851.125	1962.58	0.433677	-1.20531	1.08952e-05	0.000123118	down	928	662	1386	1858	1667	1672
LOC101789998	uncharacterized LOC101789998	49.9935	183.942	0.27179	-1.87944	1.10616e-05	0.000124828	down	71	19	95	208	141	148
CAMKK2	Uncharacterized protein	1181.98	528.776	2.23531	1.16047	1.10652e-05	0.000124828	up	1279	978	1843	460	384	547
AKT3	Uncharacterized protein	130.845	35.4754	3.68833	1.88297	1.1098e-05	0.000124988	up	156	101	200	36	18	41
DAAM1	Uncharacterized protein	516.221	206.36	2.50156	1.32283	1.1098e-05	0.000124988	up	710	343	775	238	154	167
PPRC1	Uncharacterized protein	16.5467	86.8289	0.190566	-2.39163	1.11731e-05	0.000125728	down	19	9	32	87	82	62
WDR77	WD repeat domain 77	692.349	1564.7	0.442481	-1.17631	1.11897e-05	0.000125809	down	946	546	911	1880	1310	1065
TNFRSF6B	tumor necrosis factor receptor superfamily, member 6b, decoy	509.235	3433.28	0.148323	-2.75318	1.12264e-05	0.00012611	down	435	293	1120	3786	3030	2421
LOC101797991	replication protein A 14 kDa subunit-like	80.5833	231.079	0.348726	-1.51984	1.12353e-05	0.00012611	down	96	91	78	251	224	145
TRIM47	tripartite motif containing 47	85.667	24.345	3.51888	1.81512	1.12767e-05	0.000126288	up	94	71	132	25	21	19
CAPN7	Uncharacterized protein	549.994	211.099	2.60538	1.38149	1.1277e-05	0.000126288	up	738	528	590	288	165	131
LOC101792216	uncharacterized LOC101792216	115.484	6.96614	16.5778	4.05118	1.12794e-05	0.000126288	up	182	121	79	5	6	7
LOC101793195	Uncharacterized protein	3065.16	6736.19	0.455029	-1.13597	1.1318e-05	0.000126574	down	3450	2445	4780	6968	5416	5628
FAM175A	Uncharacterized protein	226.691	564.245	0.40176	-1.31559	1.13239e-05	0.000126574	down	299	206	267	644	502	378
THRB	Uncharacterized protein	84.5013	419.186	0.201584	-2.31054	1.13753e-05	0.000127016	down	48	135	76	376	457	268
MTA3	Uncharacterized protein	159.543	43.5689	3.66184	1.87257	1.13823e-05	0.000127016	up	237	158	139	61	33	27
BBOX1	Gamma-butyrobetaine dioxygenase	656.309	261.539	2.50941	1.32735	1.14406e-05	0.000127559	up	876	513	893	311	135	267
PHTF2	Uncharacterized protein	290.603	108.451	2.67959	1.42201	1.15531e-05	0.000128707	up	375	268	345	108	113	67
ANAPC13	Anaphase-promoting complex subunit 13	52.4833	170.708	0.307445	-1.7016	1.15915e-05	0.000129028	down	67	51	59	196	133	133
LOC101792904	voltage-dependent L-type calcium channel subunit alpha-1C-like	67.3203	19.9633	3.37221	1.75369	1.17838e-05	0.00013106	up	108	47	81	15	10	27
OTUD7B	Uncharacterized protein	328.287	112.244	2.92477	1.54832	1.20605e-05	0.000134026	up	365	193	625	109	95	94
ST3GAL6	Type 2 lactosamine alpha-2,3-sialyltransferase	300.736	117.125	2.56765	1.36045	1.22337e-05	0.000135837	up	377	318	305	141	85	93
RANBP17	Uncharacterized protein	136.939	35.8333	3.82156	1.93416	1.2273e-05	0.000136162	up	181	132	149	41	26	30
ACSM3	Acyl-coenzyme A synthetase ACSM3, mitochondrial	157.394	32.2162	4.88556	2.28852	1.22865e-05	0.000136198	up	220	166	136	29	24	32
RPS20	Uncharacterized protein	2612.78	5734.91	0.455592	-1.13419	1.24431e-05	0.00013782	down	2802	2118	4170	5870	4402	5052
TCTN3	Uncharacterized protein	299.227	122.968	2.43337	1.28295	1.27479e-05	0.000141027	up	346	215	494	114	103	108
ND4L	NADH-ubiquinone oxidoreductase chain 4	2652.46	6035.38	0.439486	-1.18611	1.27583e-05	0.000141027	down	2730	1902	4746	5618	4666	5686
HYOU1	Uncharacterized protein	2107.74	4600.39	0.458165	-1.12606	1.27642e-05	0.000141027	down	2365	1608	3410	5246	3784	3404
JARID2	Uncharacterized protein	178.071	55.6648	3.19899	1.67762	1.28055e-05	0.000141367	up	187	137	300	67	28	57
RNF11	RING finger protein 11	672.527	280.584	2.39689	1.26116	1.28342e-05	0.000141567	up	846	664	753	327	241	192
HPRT1	Uncharacterized protein	145.65	383.888	0.379407	-1.39818	1.29553e-05	0.000142786	down	169	88	266	427	334	273
LRRC26	Uncharacterized protein	40.701	3.03932	13.3915	3.74324	1.29834e-05	0.000142978	up	44	41	52	6	0	3
DENR	Density-regulated protein	448.288	1030.28	0.435113	-1.20054	1.30066e-05	0.000143115	down	549	426	544	1074	740	946
BTG2	Uncharacterized protein	5177.78	1406.77	3.68062	1.87995	1.31824e-05	0.000144931	up	5748	3457	9218	1505	957	1319
LOC101800366	protein FAM46A-like	197.551	68.5215	2.88305	1.5276	1.35497e-05	0.000148847	up	209	175	295	76	44	65
LOC101789969	Uncharacterized protein	168.423	46.3058	3.63718	1.86282	1.36681e-05	0.000150024	up	166	182	213	41	34	47
SRF	Uncharacterized protein	103.034	287.264	0.358672	-1.47926	1.37126e-05	0.000150389	down	95	67	207	314	225	234
DIO3	Iodothyronine deiodinase	0.266499	33.1754	0.00803304	-6.95984	1.37581e-05	0.000150765	down	1	0	0	9	16	57
LOC101795834	promethin-A-like	176.199	62.9184	2.80044	1.48566	1.38267e-05	0.000151393	up	228	152	225	71	47	52
OMA1	Uncharacterized protein	112.074	292.756	0.382825	-1.38524	1.41011e-05	0.000154271	down	156	123	90	361	204	235
FAS	Uncharacterized protein	353.303	137.453	2.57036	1.36197	1.41664e-05	0.000154747	up	340	316	559	135	96	135
LOC101790532	phosphatidylinositide phosphatase SAC2-like	217.746	532.568	0.40886	-1.29032	1.41749e-05	0.000154747	down	326	159	276	632	385	431
ZSWIM5	Uncharacterized protein	222.199	84.9357	2.61609	1.38741	1.41792e-05	0.000154747	up	256	171	350	88	73	66
SH3BP4	Uncharacterized protein	1687.62	778.213	2.16859	1.11676	1.42131e-05	0.000154991	up	2111	1480	2195	784	658	632
MPP7	Uncharacterized protein	52.1815	4.9818	10.4744	3.3888	1.42696e-05	0.000155481	up	64	51	61	4	4	5
LOC101793639	bile acid receptor-like	85.3306	244.922	0.348399	-1.52119	1.42837e-05	0.000155508	down	91	118	60	287	174	204
NSA2	Uncharacterized protein	685.276	1604.02	0.427223	-1.22694	1.43132e-05	0.000155703	down	779	405	1283	1711	1178	1418
MAGI2	Uncharacterized protein	15.0011	0.414668	36.1761	5.17696	1.43319e-05	0.00015578	up	14	18	17	0	0	1
FBXL3	Uncharacterized protein	404.181	161.225	2.50695	1.32593	1.45237e-05	0.000157736	up	443	339	617	177	128	129
EFHD1	Uncharacterized protein	923.908	1976.84	0.467367	-1.09737	1.45376e-05	0.00015776	down	1015	876	1249	2113	1491	1704
LOC101791740	Transmembrane emp24 domain-containing protein 7	485.647	1130.07	0.429749	-1.21844	1.48318e-05	0.000160821	down	581	382	729	1139	889	986
PTRF	Uncharacterized protein	77.6134	14.7506	5.26172	2.39553	1.4884e-05	0.000161257	up	99	40	143	13	6	20
PPM1J	Uncharacterized protein	225.777	72.0033	3.13565	1.64876	1.49551e-05	0.000161897	up	227	233	298	80	60	54
PARD6B	Uncharacterized protein	573.827	1321.56	0.434203	-1.20356	1.49814e-05	0.000162051	down	632	497	848	1302	1020	1195
XYLB	Uncharacterized protein	330.376	85.6756	3.85613	1.94715	1.50777e-05	0.000162844	up	326	370	397	78	73	75
LOC101797871	uncharacterized LOC101797871	22.6602	1.441	15.7253	3.97502	1.5079e-05	0.000162844	up	31	26	17	2	1	1
LOC101804489	uncharacterized LOC101804489	97.6982	22.2526	4.39041	2.13436	1.50961e-05	0.000162897	up	115	69	161	21	16	22
USP1	Ubiquitin carboxyl-terminal hydrolase	263.247	692.215	0.380296	-1.3948	1.54504e-05	0.000166586	down	366	215	328	835	652	394
NMNAT2	Uncharacterized protein	202.243	75.9559	2.66263	1.41285	1.54963e-05	0.000166946	up	209	138	372	86	35	85
TAPT1	Uncharacterized protein	295.579	720.326	0.41034	-1.28511	1.56393e-05	0.000168352	down	385	251	381	710	589	617
LOC101794991	Phosphoglycerate kinase	4143.15	8600.44	0.481737	-1.05368	1.57203e-05	0.000169088	down	5055	3815	5240	10209	5764	7426
LOC101797033	Uncharacterized protein	2347.69	5082.89	0.46188	-1.11441	1.57499e-05	0.00016927	down	2680	1879	3611	5568	4199	3907
PSMD14	Uncharacterized protein	1179.15	2581.39	0.45679	-1.1304	1.58698e-05	0.000170423	down	1508	970	1599	2714	1938	2267
LOC101805163	Uncharacterized protein	1426.83	168.453	8.47023	3.0824	1.59425e-05	0.000171066	up	1913	698	2588	256	110	108
LOC101798330	caseinolytic peptidase B protein homolog	105.557	311.382	0.338996	-1.56066	1.59773e-05	0.000171302	down	101	77	195	277	252	291
RAPGEF2	Uncharacterized protein	1168.92	2594.59	0.450521	-1.15033	1.60163e-05	0.000171583	down	1480	821	1822	2851	1780	2363
BMI1	Uncharacterized protein	360.284	138.587	2.59969	1.37834	1.61534e-05	0.000172913	up	510	309	416	175	92	113
SLC22A13	Uncharacterized protein	95.9719	19.5439	4.91059	2.2959	1.62094e-05	0.000173375	up	132	81	117	33	10	13
CCT7	Uncharacterized protein	1556.44	3447.9	0.451416	-1.14747	1.62639e-05	0.000173818	down	2093	1062	2344	3655	2835	2752
FAM160A1	family with sequence similarity 160, member A1	131.566	328.795	0.400148	-1.3214	1.63686e-05	0.000174798	down	213	127	101	386	294	211
ASB1	Uncharacterized protein	315.076	118.348	2.66227	1.41266	1.64007e-05	0.000175002	up	406	242	451	145	87	91
LOC101798201	phosphatase and actin regulator 4-like	406.788	159.686	2.54743	1.34904	1.64344e-05	0.000175222	up	486	317	616	182	118	132
LOC101796516	Uncharacterized protein	25.3989	117.564	0.216044	-2.2106	1.65413e-05	0.000176221	down	21	22	45	127	90	99
LOC101799004	Uncharacterized protein	4.01653	38.6533	0.103912	-3.26657	1.65826e-05	0.000176521	down	6	3	5	57	34	17
NPHP3	Uncharacterized protein	62.5057	173.647	0.359958	-1.4741	1.67942e-05	0.000178632	down	93	78	29	241	121	120
NDUFS7	Uncharacterized protein	178.122	457.423	0.389403	-1.36066	1.68218e-05	0.000178783	down	208	154	251	483	363	380
RAB23	Ras-related protein Rab-23	2050.4	785.33	2.61087	1.38453	1.6954e-05	0.000179855	up	2178	1494	3559	754	464	871
SMC1B	Structural maintenance of chromosomes protein	93.3794	17.0135	5.48856	2.45643	1.69627e-05	0.000179855	up	114	93	107	19	10	17
KCNK12	Uncharacterized protein	15.0184	0	Inf	20	1.69629e-05	0.000179855	up	17	16	17	0	0	0
MAEA	Uncharacterized protein	1397.81	625.231	2.23568	1.16071	1.69999e-05	0.000179978	up	1799	1278	1682	757	456	491
PSMB1	Proteasome subunit beta type	928.431	2006.79	0.462646	-1.11202	1.70014e-05	0.000179978	down	1217	825	1131	2274	1618	1529
LOC101796693	cholesterol side-chain cleavage enzyme, mitochondrial-like	24.4911	1.97112	12.425	3.63517	1.70823e-05	0.00018055	up	30	18	38	1	1	3
ANKH	Uncharacterized protein	3952.19	1861.6	2.12301	1.08611	1.70947e-05	0.00018055	up	5002	3464	5081	1895	1629	1441
LOC101791572	ras GTPase-activating-like protein IQGAP1-like	1106.27	486.623	2.27336	1.18483	1.70958e-05	0.00018055	up	1288	1050	1416	504	434	362
GSPT1	Uncharacterized protein	898.772	1980.45	0.453822	-1.1398	1.71926e-05	0.000181429	down	1132	683	1326	2208	1653	1477
ANXA6	Annexin	1223.73	547.882	2.23357	1.15935	1.72645e-05	0.000182045	up	1530	971	1753	728	437	345
TBL3	Uncharacterized protein	237.791	573.685	0.414498	-1.27056	1.73834e-05	0.000183154	down	366	176	287	733	425	416
ETAA1	Ewing tumor-associated antigen 1	244.216	91.5264	2.66826	1.4159	1.75355e-05	0.000184612	up	307	176	376	82	80	79
LOC101802664	Uncharacterized protein	149.49	41.0306	3.64338	1.86528	1.77456e-05	0.000186677	up	167	117	238	40	34	35
AHSG	Alpha-2-HS-glycoprotein	1114.75	265.45	4.19949	2.07022	1.78079e-05	0.000187186	up	1138	1186	1397	414	107	231
LOC101797396	Uncharacterized protein	436.564	1514.39	0.288277	-1.79447	1.78581e-05	0.000187566	down	606	340	571	1448	1605	951
NEDD4L	Uncharacterized protein	1256.39	550.591	2.2819	1.19024	1.7883e-05	0.00018768	up	1394	1291	1527	664	428	407
INTU	Uncharacterized protein	22.2861	0.713886	31.2181	4.96431	1.8385e-05	0.000192798	up	36	21	18	1	0	1
ATP8	ATP synthase protein 8	5708.68	12315.1	0.463552	-1.1092	1.8428e-05	0.000193098	down	6993	4423	8500	12150	8758	11894
GABRR1	Uncharacterized protein	30.32	1.42777	21.2359	4.40843	1.84501e-05	0.000193172	up	42	26	36	2	0	2
FASTKD5	Uncharacterized protein	53.9224	185.502	0.290684	-1.78248	1.84639e-05	0.000193172	down	70	38	82	186	161	147
LOC101800839	EGF-like repeat and discoidin I-like domain-containing protein 3-like	3857.55	1366.76	2.82242	1.49693	1.8574e-05	0.000194173	up	4028	2538	7199	1589	797	1327
LOC101797689	uncharacterized LOC101797689	37.1275	0.713886	52.0075	5.70065	1.88151e-05	0.00019654	up	49	45	26	1	0	1
LOC101791936	MARVEL domain-containing protein 2-like	256.111	623.747	0.410602	-1.28419	1.89485e-05	0.000197779	down	292	237	344	584	464	604
RPL3	Uncharacterized protein	4255.52	9077.52	0.468798	-1.09296	1.89853e-05	0.000198009	down	5211	3067	6700	10533	6852	7220
SEC31A	Uncharacterized protein	936.636	2075.32	0.451322	-1.14777	1.91434e-05	0.000199502	down	1243	631	1441	2321	1723	1552
GHITM	Uncharacterized protein	2762.06	5826.51	0.47405	-1.07689	1.92408e-05	0.000200243	down	3811	2458	3155	6261	5021	4352
BCAS1	Uncharacterized protein	123.349	49.5405	2.48986	1.31606	1.92443e-05	0.000200243	up	124	145	135	57	42	35
LOC101796341	40S ribosomal protein S25-like	1199.45	2627.42	0.456513	-1.13127	1.93302e-05	0.00020098	down	1403	935	1848	2821	2119	2114
SLC25A16	Uncharacterized protein	297.553	695.919	0.427567	-1.22578	1.93887e-05	0.000201432	down	382	267	367	790	602	487
GEMIN2	Uncharacterized protein	266.651	92.9242	2.86955	1.52082	1.94052e-05	0.000201448	up	305	236	374	118	61	76
LOC101794959	Uncharacterized protein	1259.27	173.438	7.26062	2.86009	1.94548e-05	0.000201679	up	824	696	3084	168	95	199
COL18A1	Uncharacterized protein	443.125	108.582	4.08103	2.02893	1.94576e-05	0.000201679	up	587	266	734	122	57	115
HTRA3	Uncharacterized protein	81.3283	1.45423	55.9253	5.80543	1.94952e-05	0.0002019	up	100	38	160	2	2	0
LOC101794859	calponin homology domain-containing protein DDB_G0272472-like	86.452	21.2801	4.06257	2.02239	1.9509e-05	0.0002019	up	76	91	123	6	31	15
LOC101801381	tripartite motif-containing protein 45-like	151.634	49.1032	3.08807	1.62671	1.95743e-05	0.000202419	up	214	86	245	52	28	52
ACSM4	Uncharacterized protein	99.3485	281.181	0.353326	-1.50093	1.97751e-05	0.000204338	down	142	107	79	331	227	205
COL4A2	Uncharacterized protein	706.83	135.944	5.19941	2.37835	1.98138e-05	0.00020458	up	876	660	865	181	164	28
RGS8	Uncharacterized protein	0.639941	21.1373	0.0302754	-5.04571	1.99775e-05	0.000206089	down	0	1	1	20	17	19
FAM179B	family with sequence similarity 179, member B	2747.79	1321.08	2.07995	1.05655	1.99933e-05	0.000206089	up	3045	1919	4765	1445	915	1199
LOC101798523	Serum amyloid A protein	522.718	3858.83	0.13546	-2.88406	2.00061e-05	0.000206089	down	808	597	297	4846	3888	1797
DCK	Uncharacterized protein	110.815	303.487	0.365139	-1.45348	2.03239e-05	0.000209202	down	133	110	130	281	223	299
RGMA	Uncharacterized protein	107.688	11.4046	9.44252	3.23917	2.05805e-05	0.000211681	up	113	59	219	10	9	11
IPO11	Uncharacterized protein	718.776	1574.8	0.456424	-1.13155	2.08067e-05	0.000213843	down	858	587	1047	1875	1215	1191
LOC101803300	uncharacterized LOC101803300	234.003	85.7696	2.72827	1.44799	2.08647e-05	0.000214136	up	256	198	355	76	94	55
LOC101800436	nicotinamide riboside kinase 2-like	1659.32	3588.3	0.462423	-1.11271	2.08671e-05	0.000214136	down	2036	1327	2402	3768	2743	3104
GGCT	Uncharacterized protein	537.695	207.816	2.58736	1.37148	2.10314e-05	0.000215656	up	732	563	492	295	166	117
CHST5	Sulfotransferase	299.497	114.49	2.61591	1.38732	2.12661e-05	0.000217896	up	337	302	368	125	91	92
LOC101794114	riboflavin-binding protein-like	6.98564	55.2898	0.126346	-2.98455	2.13205e-05	0.000218166	down	3	12	6	67	31	53
CTGF	Connective tissue growth factor	8600.88	18334	0.46912	-1.09197	2.1325e-05	0.000218166	down	10347	5998	14055	20337	13163	15956
LOC101805185	Uncharacterized protein	146.289	392.137	0.373054	-1.42254	2.16075e-05	0.000220887	down	185	136	176	327	367	331
DUSP7	Uncharacterized protein	66.2055	177.878	0.372197	-1.42586	2.16857e-05	0.000221518	down	73	68	81	247	117	130
LOC101798818	uncharacterized LOC101798818	29.506	0.414668	71.1557	6.15291	2.21526e-05	0.000226115	up	16	34	48	0	0	1
PHB2	Uncharacterized protein	1494.42	3228.19	0.462929	-1.11114	2.25136e-05	0.000229625	down	1812	1233	2127	3347	2691	2593
DPP4	Uncharacterized protein	56.9798	6.8322	8.33989	3.06003	2.25346e-05	0.000229664	up	74	66	46	13	3	4
LOC101805105	PDZ domain-containing protein GIPC1	77.6155	221.211	0.350866	-1.51101	2.2719e-05	0.000231368	down	91	90	73	251	199	147
LOC101796084	peptidyl-prolyl cis-trans isomerase CWC27 homolog	156.013	405.898	0.384366	-1.37945	2.29345e-05	0.000233386	down	172	122	251	408	296	379
NF2	Uncharacterized protein	449.953	1002.62	0.448777	-1.15593	2.29845e-05	0.000233716	down	589	403	544	1103	783	814
BMPR2	Receptor protein serine/threonine kinase	3858.79	1884.17	2.048	1.03422	2.30303e-05	0.000233827	up	4932	2697	5986	1946	1022	2085
LOC101801346	chromosome unknown open reading frame, human C3orf37	277.281	92.9811	2.98212	1.57634	2.30516e-05	0.000233866	up	303	234	422	148	45	71
ARPC5	Actin-related protein 2/3 complex subunit 5	2232.8	4663.4	0.478794	-1.06252	2.33061e-05	0.00023627	down	2814	1905	2965	5326	3446	3847
MYO7B	Uncharacterized protein	1040.84	2211.51	0.470646	-1.08729	2.34465e-05	0.000237514	down	1366	785	1486	2708	1353	1983
SLC7A1	Uncharacterized protein	18.0904	125.103	0.144604	-2.78982	2.35819e-05	0.000238704	down	40	12	11	114	139	76
PDXDC1	Uncharacterized protein	1050.38	2195.14	0.478502	-1.0634	2.37917e-05	0.000240646	down	1326	1060	1135	2486	1814	1628
RPS15A	Uncharacterized protein	2213.18	4674.12	0.473497	-1.07857	2.39736e-05	0.000242303	down	2667	1920	3020	4992	3881	3665
LOC101798711	40S ribosomal protein S18-like	1356.29	2967.08	0.457111	-1.12938	2.41076e-05	0.000243474	down	1402	1072	2264	2934	2545	2412
LOC101804971	Uncharacterized protein	51.1834	230.043	0.222495	-2.16815	2.42035e-05	0.000244258	down	82	40	55	158	149	287
RBP4	Uncharacterized protein	202.446	642.985	0.314853	-1.66725	2.42218e-05	0.000244259	down	166	206	312	565	624	499
SCLT1	Uncharacterized protein	382.832	152.371	2.51249	1.32912	2.43107e-05	0.000244972	up	448	344	518	153	127	126
HPCAL1	Hippocalcin-like protein 1	203.347	40.3189	5.04348	2.33442	2.43884e-05	0.000245569	up	187	117	433	42	29	37
ND4	NADH-ubiquinone oxidoreductase chain 4	27465.2	68666.8	0.399978	-1.32201	2.44837e-05	0.000246216	down	28313	20201	48299	60657	53151	66979
tRNA-Cys		352.185	799.11	0.440721	-1.18206	2.44893e-05	0.000246216	down	337	347	509	931	574	663
TMED5	Uncharacterized protein	1409.37	5219.1	0.270041	-1.88875	2.46366e-05	0.000247417	down	1551	1565	1543	4410	5455	3775
RPS6KA3	Uncharacterized protein	1766.07	3658.84	0.482685	-1.05085	2.46457e-05	0.000247417	down	2154	1671	2164	4036	2828	2993
TMTC2	Uncharacterized protein	44.3749	149.313	0.297193	-1.75053	2.46849e-05	0.000247625	down	85	39	26	160	145	95
DLST	Uncharacterized protein	764.23	1715.91	0.445379	-1.16689	2.47859e-05	0.000248452	down	974	579	1118	1679	1426	1455
LOC101799735	Uncharacterized protein	64.674	12.1603	5.31843	2.411	2.49616e-05	0.000250027	up	93	60	66	14	7	12
KLF15	Uncharacterized protein	575.513	230.771	2.49387	1.31838	2.49969e-05	0.000250193	up	657	539	762	268	161	197
COL1A1	collagen, type I, alpha 1	307.586	28.5465	10.7749	3.4296	2.53587e-05	0.000253625	up	459	279	306	34	41	2
ANXA10	Uncharacterized protein	4.94061	53.5934	0.0921869	-3.43929	2.54968e-05	0.000254687	down	8	4	5	76	44	29
GANC	Uncharacterized protein	161.788	46.5267	3.47732	1.79798	2.55029e-05	0.000254687	up	189	136	234	64	32	33
SERTAD4	Uncharacterized protein	9.34915	0	Inf	20	2.56929e-05	0.000256393	up	8	14	7	0	0	0
NPLOC4	Uncharacterized protein	402.802	919.472	0.43808	-1.19073	2.57912e-05	0.000257183	down	514	303	592	1014	711	752
FAM53A	family with sequence similarity 53, member A	234.935	87.058	2.6986	1.43221	2.58593e-05	0.00025767	up	327	180	311	111	58	70
LOC101791690	Uncharacterized protein	49.8734	168.858	0.295358	-1.75947	2.59805e-05	0.000258686	down	44	53	70	169	165	115
NOMO2	Uncharacterized protein	1512.31	3193.12	0.473615	-1.07821	2.60007e-05	0.000258694	down	1778	1398	1976	3378	2850	2322
LOC101790861	Uncharacterized protein	326.503	749.254	0.435771	-1.19836	2.61195e-05	0.000259684	down	433	312	358	765	654	580
FGF19	Fibroblast growth factor	2.36352	105.24	0.0224585	-5.4766	2.62965e-05	0.00026125	down	5	2	1	84	131	58
tRNA-Phe		47.5073	175.42	0.27082	-1.8846	2.63937e-05	0.000262021	down	55	28	88	183	125	162
FAM212B	family with sequence similarity 212, member B	13.2591	0	Inf	20	2.64387e-05	0.000262274	up	14	18	10	0	0	0
SUB1	Uncharacterized protein	479.128	1073.81	0.446194	-1.16426	2.64721e-05	0.00026241	down	544	381	744	1165	844	878
ANO7	Anoctamin	1635.36	767.876	2.12972	1.09066	2.6659e-05	0.000264068	up	1718	1331	2640	822	553	688
PGAM5	Uncharacterized protein	260.166	608.137	0.427809	-1.22496	2.6724e-05	0.000264464	down	405	199	299	728	478	448
CIB1	Uncharacterized protein	638.872	1426.58	0.447834	-1.15896	2.67384e-05	0.000264464	down	736	497	998	1361	1104	1319
LMCD1	Uncharacterized protein	1908.14	443.076	4.30657	2.10654	2.68411e-05	0.000265284	up	2804	1109	2922	814	161	315
LOC101789568	uncharacterized LOC101789568	1.04836	206.281	0.00508216	-7.62034	2.69461e-05	0.000266125	down	3	0	1	324	209	48
CDR2	Uncharacterized protein	67.3543	181.682	0.370727	-1.43157	2.69664e-05	0.000266129	down	122	63	41	233	157	108
THOC5	Uncharacterized protein	235.081	564.445	0.416482	-1.26367	2.70159e-05	0.000266422	down	293	166	370	660	406	466
LOC101798642	Uncharacterized protein	42.3295	0	Inf	20	2.70634e-05	0.000266479	up	92	22	37	0	0	0
CCNE1	Uncharacterized protein	176.145	438.067	0.402096	-1.31439	2.70644e-05	0.000266479	down	235	156	211	457	397	317
RDH12	Uncharacterized protein	525.308	219.25	2.39593	1.26058	2.70814e-05	0.000266479	up	689	392	757	255	117	224
GLTPD1	glycolipid transfer protein domain containing 1	118.01	307.757	0.383452	-1.38288	2.73654e-05	0.000269076	down	160	96	152	357	206	272
SLC7A2	Uncharacterized protein	1113.6	477.755	2.3309	1.22089	2.75075e-05	0.000270196	up	1373	1070	1323	594	267	448
UBE2J2	Uncharacterized protein	1026.55	2166.08	0.47392	-1.07728	2.75253e-05	0.000270196	down	1378	879	1268	2567	1578	1743
MGEA5	Uncharacterized protein	1090.31	517.402	2.10728	1.07538	2.75397e-05	0.000270196	up	1389	850	1558	421	469	460
LSG1	Uncharacterized protein	546.69	1184.68	0.461467	-1.1157	2.77424e-05	0.000271985	down	714	464	703	1399	860	960
LOC101790717	Uncharacterized protein	44.0585	7.50423	5.87116	2.55365	2.80759e-05	0.000275053	up	57	28	72	11	5	5
IRF8	Interferon regulatory factor 8	78.843	275.181	0.286514	-1.80332	2.81718e-05	0.000275792	down	76	41	171	291	208	239
LOC101794693	Uncharacterized protein	84.0123	34.6376	2.42547	1.27826	2.82007e-05	0.000275847	up	101	41	165	18	17	53
NXT2	Uncharacterized protein	480.797	1056.45	0.455107	-1.13572	2.82186e-05	0.000275847	down	693	390	577	1221	741	902
GPR137C	G protein-coupled receptor 137C	379.279	162.805	2.32965	1.22011	2.82651e-05	0.000276059	up	424	294	608	175	136	126
ADAMTS6	Uncharacterized protein	39.6322	9.68557	4.09188	2.03276	2.82815e-05	0.000276059	up	60	35	40	14	8	5
TOR1A	Uncharacterized protein	483.747	1055.02	0.458521	-1.12494	2.83788e-05	0.000276807	down	574	457	611	1164	919	756
DOT1L	Histone-lysine N-methyltransferase, H3 lysine-79 specific	928.104	2483.37	0.373727	-1.41994	2.84444e-05	0.000277245	down	949	457	1995	2363	1872	2352
PODXL2	Uncharacterized protein	185.511	73.5685	2.5216	1.33434	2.85626e-05	0.000278195	up	250	143	253	93	41	68
MRPL28	Uncharacterized protein	479.675	1075.77	0.445889	-1.16524	2.86908e-05	0.000279056	down	583	429	629	1106	822	948
LOC101792370	lymphocyte antigen 6E-like	3184.61	33.7511	94.3556	6.56004	2.86926e-05	0.000279056	up	2800	1376	7636	47	15	32
LOC101801941	reticulon-1-like	147.42	0	Inf	20	2.87258e-05	0.000279175	up	211	6	357	0	0	0
PRDX1	Peroxiredoxin-1	2582.07	5189	0.497605	-1.00693	2.87951e-05	0.000279646	down	3441	2479	2795	6513	4042	3643
HNRNPLL	Uncharacterized protein	242.339	96.1747	2.51978	1.3333	2.88217e-05	0.000279689	up	390	198	245	113	75	73
PATZ1	Uncharacterized protein	36.7523	4.30978	8.52767	3.09215	2.88541e-05	0.000279689	up	60	27	41	6	2	4
SNX4	Uncharacterized protein	194.759	449.713	0.433073	-1.20732	2.88621e-05	0.000279689	down	224	213	208	469	379	355
ZNHIT6	Uncharacterized protein	114.19	301.29	0.379003	-1.39972	2.90473e-05	0.00028128	down	151	93	151	305	235	264
TOB1	Protein Tob1	1450.96	658.98	2.20182	1.1387	2.90816e-05	0.000281308	up	1724	1353	1858	724	525	525
IGFBP5	Insulin-like growth factor-binding protein 5	1.26193	33.2986	0.0378975	-4.72176	2.90922e-05	0.000281308	down	1	0	4	21	36	28
DHX58	ATP-dependent RNA helicase	63.8054	204.474	0.312046	-1.68017	2.94522e-05	0.000284494	down	74	51	97	246	144	167
DNAJC11	Uncharacterized protein	518.133	1148.55	0.451119	-1.14842	2.94641e-05	0.000284494	down	645	417	736	1310	863	934
CDK12	Uncharacterized protein	371.723	857.122	0.433688	-1.20527	2.94982e-05	0.000284618	down	433	280	590	932	705	667
AGO3	Uncharacterized protein	300.057	706.828	0.424511	-1.23612	3.01512e-05	0.00029071	down	391	210	457	756	597	543
LEKR1	leucine, glutamate and lysine rich 1	55.9461	12.5464	4.45914	2.15677	3.02545e-05	0.000291496	up	90	34	75	11	10	12
LOC101790333	hepatic leukemia factor-like	6.87777	57.2227	0.120193	-3.05658	3.05263e-05	0.000293903	down	11	5	8	66	43	46
PTPDC1	Uncharacterized protein	237.001	92.1402	2.57217	1.36299	3.06266e-05	0.000294657	up	301	196	322	87	76	81
RPL23	Uncharacterized protein	1280.08	2713.37	0.471768	-1.08385	3.09398e-05	0.000297457	down	1548	1015	1891	3093	2088	2157
PASK	Uncharacterized protein	57.1366	173.902	0.328557	-1.60579	3.16311e-05	0.000303886	down	95	47	54	225	126	127
CHSY3	Uncharacterized protein	29.964	3.20768	9.34134	3.22363	3.17405e-05	0.000304718	up	46	30	24	5	4	0
CHST15	Sulfotransferase	42.9215	7.21606	5.94806	2.57242	3.19225e-05	0.000306245	up	51	19	88	7	11	1
NOL10	Uncharacterized protein	251.552	595.218	0.422622	-1.24256	3.2014e-05	0.000306904	down	352	208	307	614	544	431
COG7	Uncharacterized protein	308.069	703.744	0.437758	-1.1918	3.21765e-05	0.000308241	down	430	272	350	809	607	487
NFS1	Uncharacterized protein	1088.13	2338.42	0.465325	-1.10369	3.23264e-05	0.000309456	down	1368	944	1424	2209	1921	2063
TTBK1	Uncharacterized protein	265.826	103.075	2.57896	1.36679	3.24743e-05	0.00031065	up	347	197	387	94	86	92
SNRPF	Uncharacterized protein	84.4724	238.955	0.353508	-1.50019	3.26556e-05	0.000312161	down	121	68	103	285	207	157
LOC101794817	Uncharacterized protein	76.1951	17.2444	4.41855	2.14357	3.27331e-05	0.000312679	up	79	92	77	17	10	19
RAI14	Uncharacterized protein	135.003	42.6551	3.16499	1.6622	3.28301e-05	0.000313382	up	174	163	100	50	56	9
LOC101793087	Receptor-type tyrosine-protein phosphatase N2	1908.92	32.2687	59.1569	5.88648	3.28745e-05	0.000313583	up	2095	2590	1357	53	18	21
MDK	Uncharacterized protein	67.6412	3.39889	19.901	4.31477	3.31406e-05	0.000315897	up	102	57	73	3	1	5
CCT2	Uncharacterized protein	1397.41	2925.48	0.477668	-1.06592	3.3718e-05	0.000321171	down	1889	1096	1870	3424	2203	2311
EFTUD1	Uncharacterized protein	238.084	561.698	0.423864	-1.23833	3.38229e-05	0.000321942	down	310	185	334	611	523	374
AK2	Uncharacterized protein	822.16	1809.43	0.454374	-1.13805	3.3864e-05	0.000322105	down	866	690	1292	1696	1560	1530
LOC101791686	Uncharacterized protein	193.537	41.3493	4.68054	2.22668	3.40614e-05	0.000323752	up	318	205	115	56	41	17
FGL2	Uncharacterized protein	1193.63	179.004	6.66817	2.73729	3.42088e-05	0.000324923	up	1180	787	2296	240	47	210
LOC101795114	39S ribosomal protein L16, mitochondrial-like	64.536	205.457	0.314109	-1.67066	3.4321e-05	0.000325758	down	59	44	127	212	141	197
LOC101793864	chromosome unknown open reading frame, human C4orf33	293.063	109.694	2.67165	1.41773	3.44107e-05	0.000326378	up	450	234	328	115	80	99
LOC101790057	Cytochrome P450 4V2	394.823	126.782	3.11418	1.63885	3.49934e-05	0.00033167	up	390	439	479	146	75	123
LOC101792749	AVIToxin-VAR1-like	22.8209	0.299219	76.2682	6.25301	3.50464e-05	0.000331937	up	24	14	44	1	0	0
HNRNPM	Uncharacterized protein	1889.81	3962.75	0.476893	-1.06826	3.51722e-05	0.000332894	down	2490	1509	2556	4242	3024	3375
THEMIS	Uncharacterized protein	32.8641	0.414668	79.2541	6.30841	3.52978e-05	0.000333847	up	29	49	24	0	0	1
LOC101792203	amiloride-sensitive amine oxidase [copper-containing]-like	11.0902	73.6658	0.150548	-2.73171	3.56511e-05	0.000336951	down	14	8	17	75	48	74
OTUD6B	OTU domain containing 6B	1016.78	2178.66	0.466701	-1.09943	3.57114e-05	0.000337283	down	1544	753	1249	2357	1762	1735
RNPEPL1	Uncharacterized protein	253.02	609.058	0.415429	-1.26733	3.59188e-05	0.000339002	down	274	193	420	612	507	504
LOC101800663	PDZ and LIM domain protein 7-like	121.868	49.6078	2.45663	1.29668	3.59639e-05	0.000339189	up	159	111	145	38	38	53
SLC31A1	Uncharacterized protein	717.479	1497.77	0.479031	-1.06181	3.59897e-05	0.000339194	down	984	585	910	1872	977	1253
LOC101800919	uncharacterized LOC101800919	121.94	27.4098	4.44876	2.1534	3.60947e-05	0.000339944	up	151	102	168	44	11	23
ARHGAP17	Uncharacterized protein	807.553	377.751	2.13779	1.09612	3.61729e-05	0.000340442	up	1088	649	1060	376	334	295
POLR1A	DNA-directed RNA polymerase	793.977	1745.06	0.454984	-1.13611	3.63263e-05	0.000341646	down	790	671	1290	1608	1443	1559
IGF2BP1	Uncharacterized protein	46.23	318.418	0.145187	-2.78402	3.64752e-05	0.000342806	down	37	37	88	189	298	324
LOC101797612	selenoprotein O-like	201.102	70.1397	2.86716	1.51962	3.65511e-05	0.000343279	up	237	151	317	71	60	56
LOC101799048	Uncharacterized protein C1orf172-like protein	18.3233	109.265	0.167696	-2.57608	3.69101e-05	0.000346407	down	27	17	18	134	88	76
LOX	Uncharacterized protein	329.23	45.9597	7.16346	2.84066	3.70228e-05	0.000347221	up	495	222	444	38	13	70
AGR2	Anterior gradient protein 2-like protein	34.8918	11.3495	3.0743	1.62026	3.73358e-05	0.000349912	up	19	47	46	7	10	12
SLC3A1	Uncharacterized protein	74.2895	14.893	4.98822	2.31852	3.75364e-05	0.000351546	up	102	67	84	23	10	9
GCN1L1	Uncharacterized protein	3095.9	6437.47	0.480919	-1.05614	3.81231e-05	0.000356579	down	3826	2450	4493	6987	4911	5415
LOC101802957	transducin-like enhancer protein 3-like	80.9366	18.1949	4.4483	2.15325	3.8127e-05	0.000356579	up	106	45	141	20	14	15
LOC101802856	Putative polypeptide N-acetylgalactosaminyltransferase-like protein 3	27.7417	2.14166	12.9534	3.69525	3.81757e-05	0.000356786	up	47	16	36	3	0	3
LOC101793763	coiled-coil-helix-coiled-coil-helix domain-containing protein 2, mitochondrial-like	990.611	2106.94	0.470167	-1.08875	3.82393e-05	0.000357131	down	1213	876	1305	2160	1611	1860
LOC101795031	chromosome unknown open reading frame, human C2orf47	165.147	398.889	0.414017	-1.27224	3.83068e-05	0.000357512	down	204	170	178	436	324	313
GFOD1	glucose-fructose oxidoreductase domain containing 1	280.229	658.689	0.425435	-1.23299	3.83785e-05	0.000357932	down	313	208	464	725	449	602
FAM163B	family with sequence similarity 163, member B	17.5074	0	Inf	20	3.84992e-05	0.000358808	up	15	25	15	0	0	0
LOC101797199	coagulation factor X-like	871.613	220.205	3.95819	1.98484	3.8672e-05	0.000360168	up	995	754	1252	288	101	219
KSR1	Uncharacterized protein	1274.44	580.636	2.19491	1.13416	3.88196e-05	0.000361292	up	1841	1030	1531	759	331	511
TTLL7	Uncharacterized protein	225.151	66.0688	3.40783	1.76885	3.88871e-05	0.000361669	up	262	268	203	70	57	50
SYN2	Uncharacterized protein	37.34	3.20768	11.6408	3.54112	3.89969e-05	0.000362438	up	53	32	43	5	4	0
EMG1	Uncharacterized protein	79.1048	232.212	0.340657	-1.55361	3.90437e-05	0.000362622	down	113	47	123	270	162	198
RPS8	40S ribosomal protein S8	4521.89	9412.22	0.480427	-1.05761	3.92759e-05	0.000364526	down	5058	3601	7095	9815	7487	7890
LOC101796846	calumenin-like	85.33	225.159	0.378976	-1.39982	3.93987e-05	0.000365413	down	89	71	136	258	151	201
PGRMC2	Uncharacterized protein	1736.11	806.751	2.15198	1.10566	3.96811e-05	0.000367777	up	1986	1182	2992	900	599	678
VMP1	Uncharacterized protein	1137.82	2369.74	0.480145	-1.05846	4.04929e-05	0.000375042	down	1174	1083	1613	2392	2187	1732
ADH5	Uncharacterized protein	2147.69	1026.58	2.09209	1.06495	4.07412e-05	0.000376988	up	2564	1978	2776	1039	907	790
LOC101803228	Uncharacterized protein	125.906	32.1272	3.91899	1.97048	4.07766e-05	0.000376988	up	134	104	199	30	26	29
APBA2	Uncharacterized protein	22.1789	3.8797	5.71665	2.51517	4.07874e-05	0.000376988	up	40	18	18	3	6	1
CTBS	Uncharacterized protein	526.281	187.756	2.80301	1.48698	4.12331e-05	0.000380742	up	486	606	642	169	183	142
C1D	Uncharacterized protein	318.753	716.218	0.445051	-1.16796	4.12838e-05	0.000380742	down	425	290	370	835	523	585
ZNF704	Zinc finger protein 704	851.512	345.704	2.46313	1.30049	4.12971e-05	0.000380742	up	861	918	1057	345	274	302
PSMD12	Uncharacterized protein	1112.07	2305.7	0.482313	-1.05196	4.13072e-05	0.000380742	down	1510	953	1354	2672	1764	1812
CARF	Uncharacterized protein	148.298	41.8943	3.53981	1.82367	4.13928e-05	0.000380947	up	180	149	169	47	35	31
AUP1	Uncharacterized protein	438.059	969.123	0.452015	-1.14556	4.14097e-05	0.000380947	down	477	412	602	988	852	745
MFI2	Uncharacterized protein	198.728	45.2064	4.39601	2.1362	4.14147e-05	0.000380947	up	175	149	377	54	33	36
LOC101804116	Uncharacterized protein	107.743	295.591	0.364501	-1.45601	4.15139e-05	0.000381597	down	108	109	146	233	273	263
CSGALNACT2	Chondroitin sulfate N-acetylgalactosaminyltransferase 2	311.579	123.984	2.51306	1.32945	4.16796e-05	0.000382858	up	504	270	288	154	90	95
ITGA1	Uncharacterized protein	1828.37	150.14	12.1778	3.60618	4.1934e-05	0.000384931	up	1386	955	4362	158	96	149
GNPNAT1	Uncharacterized protein	575.489	1196.57	0.48095	-1.05604	4.21384e-05	0.000386542	down	706	573	656	1477	1029	758
CCPG1	Uncharacterized protein	1391.95	653.703	2.12933	1.0904	4.25229e-05	0.000389802	up	1646	1121	2069	831	527	433
TRIB2	Uncharacterized protein	744.442	1596.12	0.466408	-1.10034	4.29227e-05	0.000393199	down	880	665	1004	1662	1344	1263
RYBP	Uncharacterized protein	95.7766	23.9642	3.99665	1.99879	4.29561e-05	0.000393236	up	131	85	111	21	20	22
LOC101793063	mucin-4-like	30.5873	96.0821	0.318345	-1.65134	4.30695e-05	0.000394005	down	37	25	44	113	68	80
LOC101792654	Uncharacterized protein	146.089	48.4252	3.01679	1.59302	4.31843e-05	0.000394786	up	210	86	227	56	43	32
WDR47	WD repeat domain 47	339.817	139.952	2.42809	1.27982	4.32466e-05	0.000395086	up	426	291	452	143	104	127
INADL	Uncharacterized protein	940.602	1952.14	0.481832	-1.0534	4.33351e-05	0.000395574	down	1260	851	1093	2055	1500	1677
LOC101802205	cytoplasmic polyadenylation element-binding protein 4-like	678.654	297.85	2.27851	1.18809	4.33591e-05	0.000395574	up	893	675	710	327	167	310
ARL6IP1	Uncharacterized protein	737.897	307.033	2.40331	1.26502	4.3414e-05	0.000395805	up	1033	600	916	422	217	212
TPT1	Uncharacterized protein	4854.17	9910.71	0.48979	-1.02976	4.349e-05	0.000396229	down	5754	4131	6852	10773	7922	7952
RPL7	Uncharacterized protein	2023.08	4195.81	0.482166	-1.0524	4.3667e-05	0.000397572	down	2465	1618	2947	4657	3293	3360
LOC101802616	uncharacterized LOC101802616	73.633	278.521	0.264372	-1.91936	4.4227e-05	0.000402397	down	93	67	91	331	214	212
SPTSSA	serine palmitoyltransferase, small subunit A	345.168	778.048	0.443633	-1.17256	4.43362e-05	0.000402846	down	431	314	432	746	690	626
WDR55	WD repeat domain 55	146.894	370.029	0.39698	-1.33286	4.43365e-05	0.000402846	down	179	148	166	343	340	294
LOC101803421	dynamin-binding protein-like	218.65	77.8002	2.81041	1.49078	4.44893e-05	0.000403961	up	208	166	395	62	59	82
PHKG1	Uncharacterized protein	111.046	298.009	0.372627	-1.4242	4.47632e-05	0.000406172	down	130	91	164	315	231	253
RPL7A	Uncharacterized protein	4774.4	9552.53	0.499805	-1.00056	4.48374e-05	0.000406308	down	6238	4126	6021	11605	7917	6493
LOC101799327	butyrophilin subfamily 1 member A1-like	69.2564	14.3681	4.82013	2.26907	4.48388e-05	0.000406308	up	117	35	98	17	12	10
CBX2	Uncharacterized protein	10.3426	0	Inf	20	4.55218e-05	0.000412218	up	22	7	7	0	0	0
A2ML1	Uncharacterized protein	14.4684	141.237	0.102441	-3.28714	4.58072e-05	0.000414523	down	8	8	37	113	96	160
PALD1	Uncharacterized protein	94.2644	26.5638	3.5486	1.82725	4.60136e-05	0.00041611	up	140	82	100	25	32	13
DNAJA3	Uncharacterized protein	547.624	1196.65	0.45763	-1.12775	4.61879e-05	0.000417404	down	648	498	724	1216	1077	897
FAT4	Uncharacterized protein	111.864	6.61453	16.9118	4.07996	4.62732e-05	0.000417893	up	253	36	122	15	4	1
KIAA1244	Uncharacterized protein	743.224	203.03	3.66066	1.8721	4.63232e-05	0.000418063	up	978	828	638	207	196	138
WEE2	Uncharacterized protein	6.86043	66.9477	0.102475	-3.28666	4.64425e-05	0.000418857	down	8	7	8	86	75	22
C8B	Uncharacterized protein	334.854	40.489	8.27023	3.04793	4.65575e-05	0.000419612	up	342	403	346	68	18	30
DDX58	Retinoic acid-inducible protein I	242.682	577.964	0.419891	-1.25191	4.68726e-05	0.000422168	down	359	227	234	528	464	534
FIBIN	Uncharacterized protein	49.7645	4.82666	10.3103	3.36602	4.69537e-05	0.000422615	up	58	33	86	5	1	7
CDCA2	cell division cycle associated 2	494.786	64.6766	7.65015	2.93549	4.72575e-05	0.000425064	up	470	628	498	56	49	65
RIOK1	Uncharacterized protein	267.032	594.431	0.449222	-1.1545	4.75326e-05	0.000427252	down	383	264	248	709	530	375
LOC101795509	histone H4-like	23.5663	0	Inf	20	4.78672e-05	0.00042997	up	34	25	19	0	0	0
GNPTG	Uncharacterized protein	535.294	232.742	2.29994	1.2016	4.82645e-05	0.000433249	up	598	470	772	240	191	191
PACSIN2	Uncharacterized protein	756.353	1539.68	0.491239	-1.0255	4.87621e-05	0.000437423	down	892	777	863	1781	1157	1234
BMP7	Uncharacterized protein	14.2531	0	Inf	20	4.88401e-05	0.000437829	up	24	15	8	0	0	0
ATP1A1	Na+/K+ ATPase alpha 1 subunit	5620.11	2796.61	2.00961	1.00692	4.93433e-05	0.000442044	up	7268	4900	7100	2823	1918	2728
CLIP1	Uncharacterized protein	1036.33	469.304	2.20822	1.14289	4.93993e-05	0.000442251	up	1257	1045	1176	575	340	366
DYNC2LI1	Uncharacterized protein	104.412	33.6005	3.10746	1.63573	4.94347e-05	0.000442272	up	155	71	142	36	33	21
TIAM1	Uncharacterized protein	29.2549	85.9955	0.340192	-1.55558	4.96069e-05	0.000443516	down	32	32	33	75	71	80
FREM2	Uncharacterized protein	346.058	6.21836	55.6511	5.79834	4.98833e-05	0.000445691	up	417	315	449	8	7	2
WDR81	Uncharacterized protein	224.863	532.025	0.422654	-1.24245	4.99759e-05	0.00044622	down	282	197	292	520	495	397
TLDC1	Uncharacterized protein	311.988	123.64	2.52336	1.33535	5.00126e-05	0.000446251	up	374	303	377	136	95	102
ITPR2	Uncharacterized protein	569.773	1203.62	0.473382	-1.07892	5.06077e-05	0.000451261	down	662	624	600	1157	1089	944
HIP1	Uncharacterized protein	353.433	150.995	2.34069	1.22694	5.09372e-05	0.000453896	up	430	269	537	177	107	126
CAT	Catalase	2592.84	922.123	2.81181	1.4915	5.10038e-05	0.000454188	up	2769	2799	3055	1314	583	674
PRDM4	Uncharacterized protein	325.823	726.194	0.448672	-1.15627	5.11984e-05	0.000455373	down	461	260	407	862	541	571
IQSEC1	Uncharacterized protein	1183.42	555.167	2.13164	1.09197	5.12048e-05	0.000455373	up	1536	1007	1528	574	396	516
LOC101790054	Uncharacterized protein	39.5282	5.42292	7.28909	2.86574	5.13356e-05	0.000456233	up	40	35	61	4	6	4
SUSD1	Uncharacterized protein	61.1449	12.1788	5.02058	2.32785	5.13789e-05	0.000456315	up	34	74	93	7	10	14
NISCH	Uncharacterized protein	915.736	414.848	2.2074	1.14235	5.18579e-05	0.000460265	up	1110	833	1182	490	309	328
ZFYVE19	Uncharacterized protein	219.849	79.8773	2.75233	1.46065	5.20411e-05	0.000461585	up	290	201	257	98	60	60
SGCE	Uncharacterized protein	89.0576	6.06105	14.6934	3.8771	5.24388e-05	0.000464805	up	129	80	94	6	9	1
IDH3A	Isocitrate dehydrogenase [NAD] subunit, mitochondrial	218.874	66.7382	3.27958	1.71351	5.25701e-05	0.000465661	up	259	114	423	89	54	41
SF3B3	Uncharacterized protein	731.048	1562.63	0.467832	-1.09594	5.26528e-05	0.000466085	down	927	523	1123	1753	1174	1292
COMMD1	Uncharacterized protein	252.996	102.538	2.46734	1.30295	5.28154e-05	0.000466937	up	319	203	356	104	70	100
PTGFRN	Uncharacterized protein	175.09	527.259	0.332075	-1.59042	5.28187e-05	0.000466937	down	161	205	209	447	532	400
RFWD3	Uncharacterized protein	294.346	103.406	2.84651	1.50919	5.2862e-05	0.000467011	up	301	265	444	141	51	95
TAX1BP3	Uncharacterized protein	692.726	335.467	2.06496	1.04611	5.30701e-05	0.000468542	up	784	560	1064	295	255	333
LYPD1	LY6/PLAUR domain containing 1	20.7059	88.6319	0.233617	-2.09779	5.31131e-05	0.000468612	down	23	22	24	83	58	94
RHEB	Uncharacterized protein	361.806	823.843	0.439168	-1.18716	5.35599e-05	0.000472243	down	427	295	533	732	707	729
PCNXL2	Uncharacterized protein	58.2751	16.0167	3.6384	1.8633	5.42272e-05	0.000477235	up	87	35	86	7	18	15
LOC101805239	uncharacterized LOC101805239	43.1723	147.129	0.293432	-1.7689	5.42308e-05	0.000477235	down	41	50	51	185	104	114
MAFG	Uncharacterized protein	451.39	191.519	2.3569	1.23689	5.42329e-05	0.000477235	up	475	401	675	204	146	164
RPL22L1	Uncharacterized protein	1105.67	2386.26	0.463346	-1.10984	5.43447e-05	0.000477905	down	1379	793	1720	2582	2210	1611
TRPM6	Uncharacterized protein	143.988	15.3526	9.37875	3.22939	5.44865e-05	0.000478838	up	105	128	265	16	15	10
MTFR1	Uncharacterized protein	472.279	1005.29	0.469793	-1.0899	5.45273e-05	0.000478883	down	593	451	554	1126	841	744
LOC101797655	Uncharacterized protein	480.361	1053.04	0.456164	-1.13238	5.49876e-05	0.000482609	down	626	334	735	1184	725	937
VOPP1	Uncharacterized protein	27.6007	3.02391	9.12748	3.19022	5.53615e-05	0.000485351	up	39	23	33	3	4	1
INPP5F	Uncharacterized protein	76.03	210.724	0.360803	-1.47072	5.53725e-05	0.000485351	down	112	57	96	247	155	170
USP14	Ubiquitin carboxyl-terminal hydrolase	1094.94	2234.64	0.489983	-1.0292	5.57982e-05	0.000488763	down	1357	960	1438	2645	1611	1818
CAV1	Caveolin	2169.67	582.507	3.72472	1.89713	5.63636e-05	0.000493393	up	2825	1388	3512	648	256	673
SORCS3	Uncharacterized protein	4.56717	39.4672	0.115721	-3.11128	5.68707e-05	0.000497507	down	9	3	4	54	38	17
LOC101800683	sorbin and SH3 domain-containing protein 1-like	140.318	549.736	0.255246	-1.97004	5.70079e-05	0.000498382	down	163	102	229	450	596	386
TTC28	Tetratricopeptide repeat protein 28	1288.59	625.638	2.05964	1.04239	5.78118e-05	0.00050508	up	1712	1030	1726	656	483	537
SACS	Sacsin	72.1361	12.5389	5.75297	2.52431	5.8713e-05	0.00051262	up	121	67	55	15	13	6
LRRFIP1	Uncharacterized protein	303.82	659.585	0.460623	-1.11834	5.91882e-05	0.000516432	down	437	285	305	723	562	489
PON2	Uncharacterized protein	492.537	86.5511	5.69071	2.50861	5.92379e-05	0.000516529	up	389	547	703	87	61	83
LOC101802807	Eukaryotic initiation factor 4A-III	857.131	1777.32	0.482261	-1.05211	5.92897e-05	0.000516646	down	1083	727	1142	2041	1328	1443
LOC101800604	uncharacterized LOC101800604	18.4481	86.3365	0.213676	-2.2265	5.95621e-05	0.000518462	down	24	13	28	79	69	80
LOC101798797	Phosphatidate cytidylyltransferase	22.5356	1.74022	12.9499	3.69487	5.95755e-05	0.000518462	up	32	25	17	3	1	1
LOC101798630	multivesicular body subunit 12B-like	172.345	59.4009	2.90138	1.53674	5.96649e-05	0.000518902	up	207	152	232	79	39	46
CSNK1G1	Uncharacterized protein	323.371	136.408	2.37062	1.24527	5.98181e-05	0.000519898	up	445	236	452	146	113	107
SLC34A2	Uncharacterized protein	44.8624	136.914	0.327668	-1.60969	5.99153e-05	0.00052026	down	32	56	58	124	116	121
TRAF2	Uncharacterized protein	501.31	214.198	2.3404	1.22676	5.99374e-05	0.00052026	up	578	503	605	244	172	163
CPEB4	Uncharacterized protein	425.88	179.302	2.37521	1.24806	6.09035e-05	0.000528304	up	492	419	526	207	95	185
SPECC1	Uncharacterized protein	74.6972	23.4045	3.19157	1.67427	6.09773e-05	0.000528601	up	113	86	44	32	11	22
SEC13	Protein SEC13-like protein	1256.87	2549.42	0.493002	-1.02034	6.12187e-05	0.000530351	down	1556	1150	1577	2900	2147	1840
SBK1	Uncharacterized protein	40.8599	4.91348	8.31589	3.05587	6.13769e-05	0.000531378	up	49	24	74	1	4	7
DIAPH2	Uncharacterized protein	1479.2	3080.21	0.480226	-1.05821	6.15886e-05	0.000532866	down	1864	1102	2216	3323	2329	2627
ID2	DNA-binding protein inhibitor ID-2	111.969	284.04	0.394202	-1.34299	6.20644e-05	0.000536637	down	138	93	156	271	233	249
LOC101805313	calcineurin B-like protein 10-like	19.8694	2.95032	6.73465	2.7516	6.32716e-05	0.00054657	up	30	17	21	7	2	0
LOC101797678	uncharacterized LOC101797678	79.8408	0.414668	192.542	7.58903	6.32948e-05	0.00054657	up	58	38	199	0	0	1
ADCYAP1R1	Uncharacterized protein	23.231	0	Inf	20	6.34716e-05	0.000547399	up	17	30	28	0	0	0
NSUN4	Uncharacterized protein	91.0879	253.022	0.36	-1.47393	6.34724e-05	0.000547399	down	99	70	150	251	190	233
LEPREL1	Uncharacterized protein	48.8552	9.79884	4.98582	2.31783	6.40764e-05	0.000552252	up	75	14	94	10	13	3
LOC101805069	chromosome unknown open reading frame, human C17orf103	396.949	147.733	2.68693	1.42596	6.41424e-05	0.000552466	up	418	265	731	156	116	124
LOC101799149	uncharacterized LOC101799149	49.1784	160.417	0.306565	-1.70573	6.43851e-05	0.0005542	down	55	38	79	171	140	119
UCKL1	Uridine kinase	247.123	601.199	0.411051	-1.28261	6.4445e-05	0.000554359	down	236	179	459	544	542	498
UGP2	Uncharacterized protein	4721.33	1297.58	3.63857	1.86337	6.48376e-05	0.000557379	up	3956	5154	6636	1275	1134	1039
HIVEP2	Uncharacterized protein	513.573	1110.66	0.462403	-1.11278	6.49574e-05	0.000558051	down	582	419	782	1113	856	992
MORC3	Uncharacterized protein	913.812	423.706	2.15671	1.10883	6.52331e-05	0.00056006	up	1124	704	1362	531	302	327
MIF4GD	MIF4G domain-containing protein	437.79	939.422	0.46602	-1.10154	6.54383e-05	0.000561462	down	486	367	662	1129	621	810
PIGY	phosphatidylinositol glycan anchor biosynthesis, class Y	139.535	330.393	0.42233	-1.24356	6.5511e-05	0.000561727	down	179	140	149	379	291	223
LOC101804634	Uncharacterized protein	611.49	271.58	2.2516	1.17095	6.63789e-05	0.000568805	up	794	530	774	280	216	230
LOC101796424	Uncharacterized protein	64.5696	3.35176	19.2644	4.26786	6.70463e-05	0.000574156	up	71	27	141	7	1	2
LOC101795933	Uncharacterized protein	5.54527	40.4793	0.13699	-2.86785	6.71561e-05	0.000574605	down	6	5	8	34	34	38
MRPL47	Uncharacterized protein	248.105	567.295	0.437347	-1.19315	6.71845e-05	0.000574605	down	344	204	308	637	452	442
CSNK1G2	Uncharacterized protein	477.393	1018.91	0.468533	-1.09378	6.74669e-05	0.000576653	down	623	380	654	1140	770	840
NCEH1	Uncharacterized protein	896.888	1828.24	0.490576	-1.02745	6.82908e-05	0.000583323	down	1158	880	981	1965	1536	1406
B4GALNT4	Uncharacterized protein	21.2732	1.62477	13.0931	3.71073	6.85167e-05	0.00058488	up	33	16	25	4	1	0
SLC25A37	Uncharacterized protein	33.5736	139.736	0.240265	-2.0573	6.8877e-05	0.000587581	down	37	25	56	114	148	102
DEPDC5	Uncharacterized protein	401.885	897.71	0.447679	-1.15946	6.89838e-05	0.000588118	down	464	336	590	827	882	658
LOC101795751	uncharacterized LOC101795751	151.332	17.5229	8.63623	3.1104	6.96177e-05	0.000593145	up	213	84	248	22	12	14
LOC101798776	hydrocephalus-inducing protein homolog	381.32	171.842	2.21902	1.14992	6.96866e-05	0.000593355	up	449	293	591	166	145	145
FAM102B	family with sequence similarity 102, member B	1606.27	4217.54	0.380854	-1.39269	6.97571e-05	0.000593578	down	1826	1379	2332	4579	3409	3349
TGFBR2	Serine/threonine-protein kinase receptor	76.4059	218.49	0.349699	-1.51581	7.01716e-05	0.000596726	down	91	50	131	262	152	181
ANAPC1	Uncharacterized protein	538.62	1150.59	0.468123	-1.09504	7.1147e-05	0.000604636	down	708	443	710	1214	838	1034
FAM199X	family with sequence similarity 199, X-linked	461.438	987.001	0.467515	-1.09691	7.12088e-05	0.000604778	down	575	412	591	1060	857	731
PGM3	Uncharacterized protein	378.316	159.778	2.36777	1.24353	7.12912e-05	0.000605095	up	458	346	486	230	105	111
KIF5C	Kinesin-like protein	64.6169	12.2419	5.27834	2.40008	7.16173e-05	0.000607478	up	120	51	51	17	8	9
HMGB3	Uncharacterized protein	1008.56	474.991	2.12332	1.08632	7.18062e-05	0.000608695	up	1257	911	1275	526	405	348
TRIB1	Tribbles-like protein 1	231.901	619.696	0.374218	-1.41805	7.21651e-05	0.000611351	down	280	161	379	620	566	463
ACTL6A	Uncharacterized protein	456.127	203.117	2.24564	1.16712	7.27273e-05	0.000615724	up	667	337	589	238	191	121
PAK3	Non-specific serine/threonine protein kinase	479.451	170.176	2.81737	1.49435	7.28266e-05	0.000616175	up	544	497	563	234	111	127
DCAF13	Uncharacterized protein	509.381	1062.82	0.479275	-1.06108	7.29745e-05	0.000616844	down	685	389	702	1297	820	781
LOC101802315	testis anion transporter 1-like	45.7156	5.25238	8.70378	3.12164	7.29976e-05	0.000616844	up	32	55	63	2	7	4
LOC101790630	uncharacterized LOC101790630	47.8274	148.169	0.32279	-1.63133	7.39842e-05	0.000624393	down	57	51	51	163	116	120
ARHGAP31	Uncharacterized protein	7.76626	32.4969	0.238984	-2.06501	7.42112e-05	0.000625915	down	13	4	11	37	21	30
LOC101793005	Uncharacterized protein	578.459	67.8467	8.52597	3.09186	7.5103e-05	0.000633038	up	836	590	502	52	97	26
FAM126A	Uncharacterized protein	53.4393	10.5281	5.07586	2.34365	7.53252e-05	0.000634512	up	95	49	36	14	9	6
ZNRF1	Uncharacterized protein	258.599	101.518	2.54732	1.34898	7.57118e-05	0.000637368	up	292	202	409	117	75	83
DGKI	Diacylglycerol kinase	32.1875	0.842564	38.2019	5.25557	7.58832e-05	0.000638083	up	33	21	61	0	1	1
USP31	Uncharacterized protein	193.138	459.626	0.420207	-1.25083	7.5892e-05	0.000638083	down	241	154	276	504	368	365
LOC101804034	uncharacterized LOC101804034	112.846	33.0271	3.41677	1.77263	7.67767e-05	0.000644419	up	101	116	163	36	21	32
MNF1	mitochondrial nucleoid factor 1	96.2897	254.187	0.378815	-1.40044	7.67898e-05	0.000644419	down	148	76	109	321	168	208
KARS	Lysine--tRNA ligase	1169.49	2424.48	0.48237	-1.05179	7.68773e-05	0.000644749	down	1432	908	1739	2587	2039	1876
SLC22A23	Uncharacterized protein	577.157	249.32	2.31492	1.21097	7.7008e-05	0.000645241	up	708	434	879	334	133	223
LOC101795229	Uncharacterized protein	181.105	32.2831	5.60991	2.48798	7.70322e-05	0.000645241	up	230	160	230	34	10	43
LOC101790828	mitogen-activated protein kinase kinase kinase 12-like	51.9148	12.1466	4.27402	2.09559	7.71362e-05	0.000645709	up	63	44	72	3	4	23
CPQ	Uncharacterized protein	228.938	90.3832	2.53297	1.34083	7.7636e-05	0.000649487	up	245	169	392	83	65	91
KCNF1	Uncharacterized protein	17.7184	0	Inf	20	7.87992e-05	0.000658554	up	31	14	16	0	0	0
HIC1	hypermethylated in cancer 1	3.11071	23.3288	0.133342	-2.90679	7.88182e-05	0.000658554	down	1	6	2	33	14	18
HMGN3	Uncharacterized protein	597.701	277.179	2.15637	1.10861	7.89917e-05	0.000659593	up	760	558	711	338	205	213
FAM188B	family with sequence similarity 188, member B	102.989	30.2103	3.40907	1.76938	7.91275e-05	0.000660241	up	165	93	91	45	12	28
GPR56	Uncharacterized protein	188.246	62.6356	3.00542	1.58757	7.92094e-05	0.000660241	up	262	145	248	95	47	34
SMAD5	Mothers against decapentaplegic homolog	890.039	422.947	2.10437	1.07339	7.92171e-05	0.000660241	up	1173	683	1247	455	271	412
MOCS1	Uncharacterized protein	4482.16	9093.71	0.492886	-1.02067	7.9661e-05	0.000663528	down	4949	2980	8028	10779	6399	7549
GPR68	Sphingosylphosphorylcholine receptor	1.54638	16.8297	0.091884	-3.44404	8.09704e-05	0.000674016	down	1	2	2	17	10	18
MAK	Uncharacterized protein	43.6876	7.00057	6.24058	2.64168	8.20529e-05	0.000682603	up	42	43	63	12	7	1
ADAT1	Uncharacterized protein	335.147	134.322	2.49511	1.3191	8.25786e-05	0.00068655	up	395	325	413	157	114	93
LPP	Uncharacterized protein	15.5149	74.8297	0.207336	-2.26996	8.31848e-05	0.000691161	down	25	8	23	70	61	67
MFAP2	Uncharacterized protein	64.0191	9.06594	7.06149	2.81997	8.36942e-05	0.000694963	up	72	58	89	5	8	10
SYTL1	synaptotagmin-like 1	1.83083	23.2169	0.0788575	-3.66461	8.39085e-05	0.000696261	down	1	4	0	35	23	7
FAM89A	family with sequence similarity 89, member A	106.656	36.4296	2.92772	1.54978	8.39991e-05	0.000696261	up	129	90	149	40	31	27
TM4SF4	Uncharacterized protein	5512.97	13552	0.406801	-1.29761	8.40065e-05	0.000696261	down	6203	4557	8349	17473	8851	10940
LUC7L2	Uncharacterized protein	913.43	1838.19	0.496917	-1.00892	8.40676e-05	0.000696338	down	1211	848	1041	2082	1335	1553
PANX2	Pannexin	43.4899	8.61737	5.04677	2.33536	8.5555e-05	0.000707847	up	57	38	54	9	9	5
LOC101793493		58.6161	1278.56	0.0458453	-4.44708	8.55628e-05	0.000707847	down	68	73	48	2216	856	601
ZFYVE20	Uncharacterized protein	1430.91	697.874	2.05039	1.0359	8.57277e-05	0.000708774	up	1686	1320	1870	708	567	587
LOC101794434	chromosome unknown open reading frame, human C10orf88	256.814	593.201	0.432929	-1.2078	8.59309e-05	0.000710016	down	348	193	356	597	494	490
FAM65A	Uncharacterized protein	254.181	573.37	0.44331	-1.17361	8.63462e-05	0.000712907	down	364	169	366	589	461	482
SH3BP2	SH3 domain-binding protein 2	51.9876	152.733	0.340382	-1.55477	8.66602e-05	0.00071472	down	51	46	82	212	105	107
AFF2	AF4/FMR2 family, member 2	137.432	51.7139	2.65755	1.4101	8.67742e-05	0.00071522	up	215	133	113	53	46	39
NACA	Uncharacterized protein	1372.7	2814.03	0.487806	-1.03562	8.68782e-05	0.000715637	down	1490	1159	2099	2840	2474	2184
KIF26A	Kinesin-like protein	186.017	7.9004	23.5453	4.55737	8.70619e-05	0.00071671	up	327	214	61	18	2	4
SLC25A17	Uncharacterized protein	217.455	87.9566	2.4723	1.30585	8.71562e-05	0.000717045	up	247	207	284	101	70	67
PIDD	Uncharacterized protein	37.0384	122.355	0.302713	-1.72398	8.74516e-05	0.000719035	down	48	27	55	144	99	89
PECR	Uncharacterized protein	188.748	478.53	0.394432	-1.34215	8.79782e-05	0.000722921	down	246	203	176	454	483	328
BTBD7	BTB/POZ domain-containing protein 7	973.061	469.818	2.07115	1.05043	8.90859e-05	0.000731574	up	1095	706	1628	537	298	438
TTF2	Uncharacterized protein	232.376	87.4132	2.65836	1.41054	8.94331e-05	0.000733976	up	325	206	262	102	69	66
EPHA5	Receptor protein-tyrosine kinase	25.4492	1.441	17.6608	4.14248	8.95504e-05	0.000734488	up	42	11	40	2	1	1
TTC39C	tetratricopeptide repeat domain 39C	290.406	83.6799	3.47044	1.79512	8.99796e-05	0.000737558	up	269	362	310	86	86	51
ZBTB2	Zinc finger and BTB domain-containing protein 2	186.885	430.877	0.433732	-1.20513	9.02648e-05	0.000739443	down	213	173	251	481	345	336
DAGLA	Uncharacterized protein	65.4751	15.3283	4.2715	2.09474	9.03845e-05	0.000739971	up	84	58	82	19	8	15
MFSD10	Major facilitator superfamily domain-containing protein 10	61.2432	18.5228	3.30637	1.72525	9.06433e-05	0.000741637	up	94	62	48	24	11	16
MAML2	Uncharacterized protein	74.6979	16.1444	4.62685	2.21003	9.10238e-05	0.000743217	up	103	54	105	19	7	18
LOC101789922	Uncharacterized protein	774.279	349.729	2.21394	1.14662	9.10378e-05	0.000743217	up	834	821	928	389	304	249
SOWAHD	sosondowah ankyrin repeat domain family member D	598.786	284.753	2.10283	1.07233	9.10582e-05	0.000743217	up	739	444	917	239	227	280
CEP170B	centrosomal protein 170B	704.706	304.752	2.31239	1.20939	9.18016e-05	0.000748828	up	939	653	800	370	249	211
LOC101804258	solute carrier family 22 member 15-like	218.141	80.3311	2.71553	1.44123	9.19664e-05	0.000749716	up	290	154	324	87	61	68
SHROOM2	Uncharacterized protein	1832.02	886.325	2.06698	1.04753	9.21279e-05	0.000750577	up	2279	1841	2028	1090	718	610
AMOTL2	Uncharacterized protein	363.349	814.412	0.446149	-1.1644	9.2347e-05	0.000751904	down	440	222	640	821	614	738
LOC101804080	Uncharacterized protein	119.739	40.3542	2.96719	1.5691	9.24457e-05	0.000751972	up	127	86	210	36	42	28
DACT1	Uncharacterized protein	36.8076	1.8689	19.6948	4.29974	9.24676e-05	0.000751972	up	49	48	20	2	2	1
BCCIP	Uncharacterized protein	187.124	438.124	0.427103	-1.22734	9.26148e-05	0.000752713	down	281	147	220	505	350	331
FGGY	Uncharacterized protein	445.294	47.3731	9.39972	3.23262	9.27773e-05	0.000753576	up	450	265	891	59	21	50
FAM166A	Uncharacterized protein	26.7472	100.215	0.266898	-1.90564	9.36356e-05	0.000760088	down	41	22	29	108	86	75
ZEB1	Uncharacterized protein	584.63	268.223	2.17964	1.12409	9.3789e-05	0.000760872	up	660	440	951	304	203	218
HSF2BP	Uncharacterized protein	36.8278	8.28591	4.44463	2.15206	9.48479e-05	0.000768698	up	28	28	74	4	3	14
LOC101794001	sestrin-2-like	62.1539	10.2025	6.09205	2.60693	9.49008e-05	0.000768698	up	63	60	88	13	7	8
LOC101791159	60S ribosomal protein L36-like	595.646	1230.97	0.483884	-1.04727	9.49257e-05	0.000768698	down	702	507	845	1425	950	960
LMOD3	Uncharacterized protein	579.109	257.45	2.2494	1.16954	9.56879e-05	0.000774402	up	750	558	647	322	204	178
LOC101803599	protein FAM115C-like	184.303	33.5075	5.50035	2.45952	9.58382e-05	0.00077515	up	252	213	136	60	16	21
EIF3G	eukaryotic translation initiation factor 3, subunit G	494.508	1043.21	0.474023	-1.07697	9.60987e-05	0.000776788	down	519	417	776	1178	776	865
ELP6	Uncharacterized protein	263.807	100.23	2.63201	1.39617	9.62138e-05	0.00077725	up	299	215	402	111	82	77
NRSN1	Uncharacterized protein	1151.01	323.706	3.55572	1.83014	9.66078e-05	0.000779963	up	1323	1061	1541	385	120	379
ATXN3	Uncharacterized protein	374.834	163	2.29959	1.20138	9.67794e-05	0.000780877	up	440	329	518	174	142	121
GIP	Uncharacterized protein	72.8001	16.7518	4.34582	2.11963	9.69061e-05	0.00078143	up	76	79	87	15	18	11
COL4A3BP	Uncharacterized protein	1366.86	678.159	2.01554	1.01116	9.7275e-05	0.000783933	up	1610	1187	1903	697	548	567
RPL22	60S ribosomal protein L22	474.865	1000.88	0.474446	-1.07569	9.78729e-05	0.000788277	down	524	378	753	1178	742	798
SEMA3E	Semaphorin-3E	11.1623	59.7473	0.186826	-2.42023	9.81118e-05	0.000789726	down	8	18	8	76	39	49
SLC23A2	Solute carrier family 23 member 2	506.504	1025.43	0.493946	-1.01758	9.84223e-05	0.00079175	down	679	485	546	1281	769	755
TTC8	Uncharacterized protein	53.9954	12.7985	4.2189	2.07687	9.95361e-05	0.00080023	up	60	66	49	16	10	9
PSMD11	26S proteasome non-ATPase regulatory subunit 11	713.136	1464.01	0.487112	-1.03767	9.97668e-05	0.000801604	down	897	616	937	1602	1272	1062
KLHDC7A	kelch domain containing 7A	75.9411	16.0783	4.72321	2.23977	0.000100241	0.000804928	up	111	53	103	19	2	23
LOC101797862		48.7349	8.04975	6.05422	2.59794	0.000100437	0.000806025	up	50	53	59	13	1	9
DNAL1	dynein, axonemal, light chain 1	132.726	43.2957	3.06557	1.61615	0.000100773	0.000808238	up	182	111	164	49	33	35
PTPRN2	protein tyrosine phosphatase, receptor type, N polypeptide 2	566.138	11.1817	50.631	5.66195	0.000101087	0.000810271	up	613	776	399	19	8	5
LIMS2	Uncharacterized protein	1018.1	2041.92	0.498597	-1.00406	0.000101528	0.000813315	down	1302	773	1482	2445	1284	1835
BCMO1	Uncharacterized protein	374.178	778.117	0.480876	-1.05626	0.00010215	0.000817808	down	443	422	366	754	671	640
RHOB	ras homolog family member B	491.134	217.015	2.26313	1.17832	0.000102412	0.000819416	up	495	405	807	235	181	167
2015-09-02	Uncharacterized protein	768.567	275.542	2.7893	1.4799	0.000102504	0.000819623	up	1012	834	694	309	267	166
EMP1	Uncharacterized protein	44.7312	393.762	0.1136	-3.13797	0.0001026	0.000819623	down	79	37	37	391	202	459
LOC101800999	dynamin-binding protein-like	693.103	316.767	2.18806	1.12965	0.000102621	0.000819623	up	630	594	1177	255	279	292
AR	Uncharacterized protein	152.441	469.657	0.32458	-1.62335	0.000102803	0.000820437	down	165	131	230	393	377	460
ACPL2	acid phosphatase-like 2	177.668	365.337	0.486311	-1.04005	0.000102845	0.000820437	down	277	123	224	494	206	312
LOC101798415	myeloid-associated differentiation marker-like	141.899	363.494	0.390374	-1.35707	0.000104117	0.000830086	down	180	139	159	387	230	360
ABLIM1	Uncharacterized protein	4543.69	2259.16	2.01123	1.00808	0.000104436	0.000832134	up	6250	3239	6475	3143	1385	1751
LOC101792772	Uncharacterized protein	226.337	485.994	0.465719	-1.10247	0.000104952	0.000835749	down	291	194	293	660	306	380
AFG3L2	Uncharacterized protein	1054.73	2146.77	0.491311	-1.02529	0.000106737	0.000849345	down	1325	872	1449	2256	1667	1829
WDR75	Uncharacterized protein	277.974	620.232	0.448178	-1.15786	0.000106786	0.000849345	down	423	182	378	758	463	471
TNNC1	Troponin C	111.413	0	Inf	20	0.000107876	0.000856994	up	44	92	256	0	0	0
TP53I3	Uncharacterized protein	156.754	57.5911	2.72184	1.44458	0.000108254	0.000859493	up	214	108	231	57	55	41
PHYHIPL	Uncharacterized protein	33.4844	3.5408	9.45674	3.24134	0.000109135	0.000865803	up	42	43	22	2	3	4
ITIH3	Uncharacterized protein	98.1133	1960.84	0.0500365	-4.32088	0.000109178	0.000865803	down	74	105	150	1018	1759	2179
BMPER	Uncharacterized protein	143.466	39.738	3.6103	1.85212	0.000109289	0.000865936	up	158	151	170	46	20	42
NIT2	Uncharacterized protein	2592.38	1264.01	2.05092	1.03627	0.000109324	0.000865936	up	3340	2431	3020	1535	991	918
KLHL14	kelch-like family member 14	5.47423	31.2111	0.175394	-2.51133	0.000110076	0.000871372	down	6	8	3	34	23	27
MAP2K6	Uncharacterized protein	54.9005	8.78791	6.24728	2.64323	0.000110178	0.000871671	up	67	40	86	11	8	5
OSBPL3	Oxysterol-binding protein	83.3358	267.526	0.311506	-1.68267	0.000111322	0.000880198	down	113	68	107	175	247	264
LOC101791993	eukaryotic translation initiation factor 4 gamma 1-like	2990	6068.71	0.492691	-1.02125	0.000112163	0.000886323	down	3432	2050	5118	6436	5015	4816
TYMS	Uncharacterized protein	91.529	28.2437	3.24069	1.6963	0.000113372	0.000895352	up	124	77	114	32	32	12
LOC101801614	sodium/potassium-transporting ATPase subunit alpha-1-like	906.085	439.952	2.05951	1.0423	0.000113852	0.000898612	up	1101	859	1112	444	332	398
TNR	Uncharacterized protein	32.9161	1.72699	19.0598	4.25246	0.00011402	0.000899276	up	36	31	45	3	0	2
LOC101805392	uncharacterized LOC101805392	140.067	55.8326	2.50869	1.32694	0.000114394	0.000901299	up	181	105	204	55	30	64
LPCAT1	Uncharacterized protein	40.1467	7.31301	5.48976	2.45674	0.000115149	0.000906713	up	67	36	33	13	8	0
ANXA2	Annexin	6673.69	1877.89	3.55382	1.82937	0.000115409	0.000907695	up	10767	5391	6815	2152	997	1947
DCAF6	Uncharacterized protein	1562.33	750.181	2.08261	1.05839	0.000115654	0.000909069	up	1907	1403	2031	953	484	622
LOC101793232	plasma membrane calcium-transporting ATPase 1-like	118.778	278.888	0.425896	-1.23143	0.000115719	0.000909069	down	137	92	186	294	201	253
CDC123	Uncharacterized protein	190.351	423.179	0.449812	-1.1526	0.000116904	0.000917839	down	218	216	192	433	410	285
TNKS1BP1	tankyrase 1 binding protein 1, 182kDa	10.8943	37.5612	0.290041	-1.78567	0.000117367	0.000920934	down	17	8	13	31	38	29
USP28	Ubiquitin carboxyl-terminal hydrolase	705.455	209.458	3.36801	1.7519	0.000118061	0.000925297	up	883	408	1248	248	162	159
FUNDC1	Uncharacterized protein	461.369	203.501	2.26716	1.18089	0.000118181	0.000925692	up	557	412	610	244	147	163
TRPC4	Short transient receptor potential channel 4	25.3973	0.299219	84.8788	6.40733	0.000119245	0.000933481	up	33	24	29	1	0	0
SLC9B2	Uncharacterized protein	241.913	90.6182	2.66958	1.41661	0.000119459	0.000934614	up	261	232	328	93	76	73
LOC101800007	transmembrane and coiled-coil domains protein 1-like	290.361	628.973	0.461643	-1.11515	0.000119584	0.000935041	down	327	267	397	650	526	505
LOC101799736	fatty acyl-CoA reductase 1-like	33.2864	1.31232	25.3645	4.66474	0.000120022	0.000937922	up	59	36	14	3	0	1
NFKBIA	Uncharacterized protein	620.644	272.783	2.27523	1.18601	0.000120153	0.000938396	up	795	505	849	382	194	182
TBC1D13	Uncharacterized protein	227.895	88.9873	2.56098	1.3567	0.000120463	0.000940269	up	331	158	313	109	61	73
LSMEM1	Coiled-coil domain-containing transmembrane protein C7orf53	52.9832	833.344	0.063579	-3.9753	0.000120576	0.000940603	down	47	29	117	965	324	979
MCU	Uncharacterized protein	483.407	1023.17	0.472459	-1.08174	0.00012066	0.000940663	down	569	296	868	1268	736	793
TRIM14	Uncharacterized protein	136.307	336.015	0.405658	-1.30166	0.000120724	0.000940663	down	121	128	217	365	249	290
LOC101795739	uncharacterized LOC101795739	54.8827	11.2839	4.86381	2.28209	0.000122245	0.00095196	up	68	45	77	18	7	7
LOC101792938	60S ribosomal protein L22-like	316.563	704.223	0.44952	-1.15354	0.00012252	0.000953021	down	319	244	547	671	536	661
KIF1A	Kinesin-like protein	17.5249	0	Inf	20	0.000122523	0.000953021	up	16	18	25	0	0	0
LOC101793992	Histone H2B	119.188	31.2513	3.81387	1.93125	0.000124266	0.000964898	up	128	124	147	45	28	14
LOC101803843	Uncharacterized protein	495.718	1039.76	0.476761	-1.06866	0.000126039	0.0009781	down	638	395	688	1052	826	896
LOC101799208	caseinolytic peptidase B protein homolog	152.371	373.999	0.40741	-1.29545	0.000126375	0.000979687	down	161	117	256	362	273	359
UTP18	Uncharacterized protein	377.347	809.913	0.46591	-1.10188	0.00012639	0.000979687	down	520	300	488	877	700	598
BYSL	Uncharacterized protein	177.708	412.208	0.431114	-1.21386	0.000127139	0.000984404	down	239	128	257	505	303	317
PHTF1	putative homeodomain transcription factor 1	580.533	268.879	2.15909	1.11042	0.000127146	0.000984404	up	613	606	724	265	163	289
LOC101801929	probable inactive protein kinase-like protein SgK196-like	82.0742	215.037	0.381675	-1.38958	0.000128194	0.000991953	down	110	70	102	238	183	158
PRTFDC1	Uncharacterized protein	39.7221	1.42777	27.821	4.7981	0.00012912	0.000998536	up	53	40	40	2	0	2
SMARCA5	Uncharacterized protein	901.014	1830.08	0.492336	-1.02228	0.000129452	0.00100053	down	1245	683	1214	1967	1442	1506
RBM22	Uncharacterized protein	706.519	1416.08	0.498925	-1.0031	0.000129587	0.001001	down	923	568	958	1741	931	1198
GALNT18	Polypeptide N-acetylgalactosaminyltransferase	133.419	45.4761	2.93382	1.55278	0.000129733	0.0010013	up	183	107	172	65	24	38
CCNI	Uncharacterized protein	1589.44	590.581	2.69132	1.42832	0.000129776	0.0010013	up	2019	1410	2009	674	435	489
SUSD3	sushi domain containing 3	158.199	44.8529	3.52707	1.81847	0.000130042	0.00100277	up	173	97	298	55	15	53
LOC101797599	Uncharacterized protein	65.3097	4.12074	15.849	3.98632	0.000130447	0.00100532	up	125	64	28	11	0	2
PSMA7	Uncharacterized protein	635.783	1273.13	0.499385	-1.00178	0.000131292	0.00101125	down	845	537	806	1527	921	1018
ATP13A2	Uncharacterized protein	89.5943	235.806	0.379948	-1.39612	0.000132022	0.00101629	down	101	61	156	236	231	160
LOC101792096	PDZ domain-containing protein 2-like	13.7043	0.727115	18.8475	4.2363	0.000132349	0.00101822	up	7	15	24	1	1	0
FRMD5	Uncharacterized protein	13.7558	0.897656	15.3242	3.93774	0.000132641	0.00101988	up	20	12	15	3	0	0
FBN2	Uncharacterized protein	103.99	11.026	9.43135	3.23746	0.000132822	0.00102069	up	127	117	98	9	3	17
RRP1B	Ribosomal RNA processing protein 1-like protein B	583.034	1194.46	0.488117	-1.0347	0.000133715	0.00102638	down	761	460	805	1360	914	956
LOC101799390	uncharacterized LOC101799390	110.375	1.14178	96.6692	6.59498	0.000134224	0.0010291	up	217	16	186	1	1	1
LOC101796726	chromosome unknown open reading frame, human C3orf18	219.061	78.1675	2.80246	1.48669	0.000134422	0.00103003	up	207	246	272	72	80	54
LOC101795816	alpha-2-macroglobulin-like	76.5883	223.759	0.34228	-1.54675	0.00013494	0.00103341	down	57	52	165	254	167	184
LOC101803640	derlin-2-like	146.953	43.2502	3.39774	1.76458	0.00013579	0.00103933	up	130	109	280	45	26	45
LOC101802575	Vesicle-trafficking protein SEC22b	1438.19	700.628	2.05272	1.03754	0.000136583	0.00104467	up	1736	1316	1852	836	513	557
RBFOX3	Uncharacterized protein	17.5775	0.842564	20.862	4.3828	0.000136644	0.00104467	up	21	16	23	0	1	1
EPHX1	Uncharacterized protein	792.549	229.501	3.45336	1.788	0.00013686	0.00104572	up	894	1061	560	303	151	179
HEATR2	HEAT repeat containing 2	107.347	263.923	0.406736	-1.29783	0.000137484	0.00104989	down	142	88	141	261	255	185
MYBL2	Uncharacterized protein	110.235	20.1851	5.46122	2.44922	0.000137866	0.00105221	up	211	77	96	25	20	10
RPL15	Ribosomal protein L15	1651.27	3334.31	0.495236	-1.01381	0.000138411	0.00105577	down	1814	1235	2752	3483	2716	2725
SMYD2	Uncharacterized protein	563.99	260.172	2.16776	1.1162	0.00013849	0.00105577	up	693	534	685	275	219	203
STXBP4	Uncharacterized protein	138.024	53.4563	2.582	1.36849	0.000138867	0.00105791	up	172	104	207	59	42	43
CREBRF	Uncharacterized protein	168.81	62.5338	2.69951	1.4327	0.000138928	0.00105791	up	186	156	234	72	58	39
LOC101801473	uncharacterized LOC101801473	794.924	387.724	2.05023	1.03579	0.000139017	0.00105798	up	898	722	1098	406	284	349
FAM122B	family with sequence similarity 122B	551.121	1126.18	0.489373	-1.03099	0.00013919	0.0010587	down	679	475	741	1284	857	905
LOC101799874	Uncharacterized protein	274.667	83.0075	3.30894	1.72637	0.000139661	0.00106168	up	445	261	217	112	74	43
LOC101793730	Uncharacterized protein	129.819	16.6782	7.78377	2.96047	0.000140635	0.00106847	up	114	85	266	19	16	10
MANEA	Uncharacterized protein	370.105	155.177	2.38505	1.25402	0.000141267	0.00107267	up	448	349	459	182	122	117
CNKSR2	Uncharacterized protein	8.47707	51.1299	0.165795	-2.59253	0.000141655	0.00107501	down	15	7	7	67	30	44
TM4SF1	Uncharacterized protein	49.9607	368.038	0.135749	-2.88099	0.000142279	0.00107913	down	51	23	110	574	168	300
GAS6	Uncharacterized protein	239.131	91.9047	2.60195	1.37959	0.0001425	0.00108019	up	321	205	295	66	63	109
DOCK4	Uncharacterized protein	148.203	54.7597	2.70642	1.43638	0.000143436	0.00108606	up	223	108	187	68	31	51
KLHL25	Uncharacterized protein	1438.39	2922.76	0.492134	-1.02288	0.0001439	0.00108896	down	1677	1036	2356	3000	2247	2565
COL1A2	Uncharacterized protein	1011.34	82.6399	12.2379	3.61328	0.000144147	0.00109022	up	1930	1155	182	96	126	0
LOC101797254	Uncharacterized protein	116.642	534.604	0.218184	-2.19638	0.000144683	0.00109365	down	157	120	112	557	574	295
LOC101796990	uncharacterized LOC101796990	131.258	1.12855	116.306	6.86178	0.000145026	0.00109501	up	117	44	333	1	0	2
LOC101791781	MKI67 FHA domain-interacting nucleolar phosphoprotein-like	309.796	672.015	0.460996	-1.11717	0.000145427	0.00109742	down	405	240	434	731	537	539
EIF2D	Uncharacterized protein	286.165	615.61	0.464848	-1.10517	0.00014614	0.00110218	down	331	272	368	639	517	490
SNRNP200	Uncharacterized protein	842.887	1753.26	0.480755	-1.05663	0.000147435	0.00111132	down	1096	522	1393	1843	1386	1468
NOB1	Uncharacterized protein	81.2407	223.784	0.363032	-1.46183	0.000148345	0.00111755	down	95	66	121	215	236	141
LOC101800529	Uncharacterized protein	120.145	299.09	0.401704	-1.3158	0.000149537	0.0011259	down	142	87	194	291	260	243
PRUNE2	prune homolog 2 (Drosophila)	43.5408	1.56968	27.7387	4.79383	0.000149983	0.00112862	up	76	43	26	1	2	1
NOM1	Uncharacterized protein	218.353	495.873	0.440341	-1.18331	0.000150128	0.00112908	down	302	168	290	522	444	361
NIP7	60S ribosome subunit biogenesis protein NIP7-like protein	76.6356	207.637	0.369085	-1.43797	0.000150671	0.00113253	down	102	52	117	247	141	177
PFKFB2	Uncharacterized protein	179.47	63.2991	2.83526	1.50348	0.0001517	0.00113962	up	228	140	257	75	48	49
MRS2	Uncharacterized protein	217.804	478.142	0.455522	-1.13441	0.00015201	0.00114131	down	293	195	255	525	415	346
MRPL23	39S ribosomal protein L23, mitochondrial	364.035	766.893	0.474688	-1.07495	0.000152831	0.00114683	down	505	308	438	855	610	603
PICALM	Uncharacterized protein	1225.57	3673.32	0.333641	-1.58363	0.000153401	0.00114982	down	1449	805	2108	4603	2069	3402
FN3K	Uncharacterized protein	443.725	198.739	2.2327	1.15879	0.000153628	0.00115088	up	500	372	663	206	145	181
LOC101804415	protein Jumonji-like	138.792	47.7247	2.90817	1.54011	0.000154717	0.00115839	up	149	107	230	49	23	56
VAV3	Uncharacterized protein	199.325	34.6259	5.75653	2.5252	0.000155647	0.0011647	up	243	234	173	51	22	24
ND5	NADH-ubiquinone oxidoreductase chain 5	25729.2	61761.4	0.41659	-1.2633	0.000156113	0.00116689	down	27348	15859	49180	55872	47287	59830
PDK1	Uncharacterized protein	937.623	3004.41	0.312083	-1.68	0.000157298	0.00117509	down	1075	888	1221	2743	3104	2063
BRD3	Uncharacterized protein	147.854	52.3797	2.82274	1.4971	0.000160352	0.00119657	up	171	126	213	71	34	40
F13A1	Uncharacterized protein	703.064	60.3543	11.649	3.54213	0.000160554	0.00119741	up	757	902	597	55	27	78
SLC13A3	Uncharacterized protein	743.888	347.562	2.1403	1.09781	0.000161077	0.00120064	up	1026	573	990	391	189	361
ABCC3	Uncharacterized protein	347.592	22.681	15.3252	3.93783	0.000162917	0.00121301	up	363	182	722	32	19	12
MGST3	Uncharacterized protein	482.363	978.351	0.493037	-1.02023	0.000164035	0.00122065	down	556	453	631	1106	824	711
TXN	Uncharacterized protein	453.809	2323.94	0.195276	-2.35641	0.000167148	0.00124244	down	451	316	844	1955	1462	2685
NFIB	Nuclear factor 1	712.916	329.617	2.16286	1.11294	0.000167447	0.00124397	up	810	543	1144	414	193	297
LOC101801843	Uncharacterized protein	45.8364	8.03961	5.70132	2.5113	0.000167619	0.00124446	up	57	44	54	3	7	10
STOML2	Uncharacterized protein	335.947	732.957	0.458344	-1.1255	0.000167699	0.00124446	down	394	287	477	638	696	589
DAPK1	Uncharacterized protein	124.872	298.742	0.417994	-1.25845	0.000168051	0.00124639	down	156	108	165	279	223	289
LOC101789763	forkhead-associated domain-containing protein 1-like	43.636	2.97099	14.6873	3.8765	0.00016845	0.00124866	up	31	58	51	3	0	5
PARP4	Uncharacterized protein	1025.11	499.349	2.05289	1.03766	0.00016912	0.00125293	up	1393	874	1254	617	376	371
ST14	Uncharacterized protein	571.703	2085.41	0.274145	-1.86699	0.000170139	0.00125935	down	558	472	958	1999	1431	2110
LOC101804909	Uncharacterized protein	392.683	183.553	2.13935	1.09717	0.000170387	0.00126022	up	547	289	538	156	128	198
GCAT	Uncharacterized protein	1165.08	565.036	2.06196	1.04402	0.0001715	0.00126776	up	1208	1008	1804	666	409	460
LOC101799912	Uncharacterized protein	15.8349	2.08657	7.58898	2.92391	0.000171862	0.00126973	up	25	12	18	0	1	4
FAM20C	Uncharacterized protein	259.329	105.603	2.4557	1.29613	0.000172689	0.00127514	up	412	187	307	123	60	104
TMEM110	transmembrane protein 110	158.196	367.268	0.430736	-1.21512	0.000173208	0.00127827	down	203	130	214	448	264	290
AGTPBP1	Uncharacterized protein	132.958	43.5006	3.05646	1.61186	0.000173612	0.00128054	up	173	112	173	58	33	29
ACTA2	Uncharacterized protein	1990.96	291.871	6.82137	2.77006	0.00017386	0.00128106	up	3057	1499	2371	358	205	234
TAF1D	Uncharacterized protein	409.529	850.854	0.481315	-1.05495	0.000175024	0.00128883	down	591	297	546	1066	617	646
WDR52	WD repeat domain 52	96.4313	265.169	0.36366	-1.45934	0.000176012	0.00129539	down	152	73	110	318	157	248
LOC101791204	Hepatic leukemia factor	27.8845	102.684	0.271557	-1.88067	0.000176236	0.00129633	down	43	21	33	139	73	72
RPF2	Uncharacterized protein	273.614	564.775	0.484466	-1.04553	0.000176744	0.00129864	down	341	263	321	679	440	418
LOC101789716	scavenger receptor class F member 2-like	18.7303	0.414668	45.1695	5.49728	0.000177782	0.00130556	up	40	13	12	0	0	1
DNAJC2	Uncharacterized protein	599.786	1217.57	0.492609	-1.02148	0.000179255	0.00131565	down	842	461	784	1405	985	906
EPB41L3	Uncharacterized protein	22.0891	1.441	15.329	3.93819	0.000179372	0.00131579	up	47	20	7	2	1	1
LOC101798097	phosphoenolpyruvate carboxykinase [GTP], mitochondrial-like	74.1142	252.223	0.293844	-1.76688	0.000179759	0.0013179	down	80	44	143	193	219	243
PPARGC1A	Uncharacterized protein	23.7445	90.2863	0.262991	-1.92692	0.000180455	0.00132228	down	30	18	35	112	60	75
BLVRA	Biliverdin reductase A	100.703	7.69326	13.0898	3.71037	0.00018242	0.00133595	up	106	44	222	6	7	7
SCAF8	Uncharacterized protein	467.188	968.371	0.482447	-1.05156	0.000182712	0.00133736	down	635	333	674	1108	808	702
SUPV3L1	Uncharacterized protein	414.395	864.874	0.47914	-1.06148	0.000183812	0.00134404	down	504	384	522	878	757	671
LOC101796529	filamin-C-like	25.3252	3.05254	8.29643	3.05249	0.000183826	0.00134404	up	39	14	38	6	1	2
LOC101797486	methyltransferase-like protein 7A-like	831.6	86.5672	9.60642	3.264	0.000183968	0.00134435	up	905	1042	735	136	51	58
NUPL1	Uncharacterized protein	148.473	349.919	0.424306	-1.23682	0.00018487	0.0013502	down	200	118	197	365	297	274
LOC101794952	uncharacterized LOC101794952	21.8265	0	Inf	20	0.000185683	0.0013554	up	18	27	26	0	0	0
LOC101796218	lipoprotein lipase-like	11.3214	52.6093	0.215198	-2.21626	0.000186302	0.00135918	down	13	8	19	53	51	36
SH3BGRL	Uncharacterized protein	735.311	360.46	2.03992	1.02852	0.000186699	0.00136134	up	840	653	1029	362	284	315
ENTPD5	Uncharacterized protein	1534.43	3413.95	0.44946	-1.15374	0.000186853	0.00136172	down	1758	1738	1552	3329	3317	2408
SLC38A4	Sodium-coupled neutral amino acid transporter 4	6365.72	1061.16	5.99884	2.58468	0.000186989	0.00136197	up	7228	7906	5415	1385	679	859
TRIM41	Uncharacterized protein	456.153	148.153	3.07892	1.62243	0.000187186	0.00136266	up	352	392	840	160	120	118
PITX2	Uncharacterized protein	540.454	87.3816	6.18499	2.62877	0.000187638	0.00136522	up	532	315	1107	68	52	108
MYO1C	Uncharacterized protein	3451.91	6934.17	0.497812	-1.00633	0.000190146	0.00138196	down	4222	1954	6279	7418	5219	5984
HIBCH	Uncharacterized protein	1221.72	609.902	2.00314	1.00226	0.000190624	0.00138468	up	1698	971	1565	704	496	451
IRS2	insulin receptor substrate 2	87.0193	227.653	0.382246	-1.38743	0.000191162	0.00138709	down	90	109	82	209	194	198
B3GALT5	Uncharacterized protein	9.84656	49.993	0.196959	-2.34403	0.000193247	0.00140146	down	10	12	10	83	21	39
RAMP2	Uncharacterized protein	0	16.784	0	-20	0.000193534	0.00140278	down	0	0	0	19	24	2
HHEX	Uncharacterized protein	1135.45	556.298	2.04109	1.02934	0.000195144	0.00141368	up	1465	1102	1262	659	471	380
MTFP1	mitochondrial fission process 1	22.4463	89.8548	0.249807	-2.00112	0.000195444	0.0014151	down	33	12	36	111	50	85
AGO2	Uncharacterized protein	82.4984	225.712	0.365503	-1.45205	0.000195647	0.0014158	down	124	45	128	273	167	175
EPDR1	Mammalian ependymin-related protein 1	15.3192	1.62477	9.42856	3.23704	0.000197773	0.00143041	up	26	10	18	4	1	0
MRPL15	Uncharacterized protein	298.072	639.478	0.466118	-1.10123	0.000199687	0.00144348	down	353	262	408	654	540	513
GALE	Uncharacterized protein	92.3729	322.069	0.286811	-1.80183	0.000200607	0.00144934	down	61	75	188	255	335	247
FANCA	Uncharacterized protein	24.0456	84.3931	0.284924	-1.81135	0.000200775	0.00144978	down	37	14	35	94	53	81
TTLL11	Uncharacterized protein	81.078	24.7596	3.2746	1.71132	0.00020176	0.00145611	up	114	59	111	25	21	20
RFX2	DNA-binding protein RFX2	24.8803	82.5666	0.301336	-1.73056	0.000203483	0.00146696	down	44	19	23	106	51	70
LOC101790204	histone H1.11L-like	71.8906	15.7488	4.56483	2.19056	0.000203869	0.00146895	up	93	46	117	23	12	9
FTO	Uncharacterized protein	16.226	74.786	0.216966	-2.20446	0.000204044	0.00146942	down	25	13	18	93	39	73
LOC101795168	uncharacterized LOC101795168	33.397	2.89523	11.5352	3.52797	0.000206112	0.00148272	up	29	30	56	4	3	1
HFE2	Uncharacterized protein	287.342	115.838	2.48055	1.31066	0.000206515	0.00148483	up	299	237	462	116	83	110
DIO1	Iodothyronine deiodinase	304.461	89.0701	3.41822	1.77325	0.0002067	0.00148536	up	435	323	250	128	45	76
INPP5B	Uncharacterized protein	617.806	283.842	2.17659	1.12207	0.000209145	0.00150132	up	761	568	775	348	169	259
LOC101799909	uncharacterized LOC101799909	1.01307	19.0243	0.0532516	-4.23103	0.000209918	0.00150606	down	1	0	3	20	14	17
STXBP5L	Uncharacterized protein	27.5468	0.855793	32.1886	5.00848	0.000210493	0.00150938	up	44	29	18	0	2	0
KHDRBS3	KH domain-containing, RNA-binding, signal transduction-associated protein 3	391.644	835.953	0.468501	-1.09388	0.000210894	0.00151144	down	611	321	415	903	513	835
XPC	Uncharacterized protein	296.702	121.785	2.43627	1.28468	0.000212054	0.00151895	up	366	312	310	156	98	80
LOC101803469	Uncharacterized protein	2154.83	4397.39	0.490024	-1.02908	0.00021251	0.0015214	down	2835	2348	1933	4853	4287	2679
SLC29A1	Uncharacterized protein	26.2673	106.88	0.245764	-2.02465	0.000213435	0.0015272	down	40	17	36	85	107	86
RYR3	Uncharacterized protein	23.7802	84.5974	0.281099	-1.83085	0.000214572	0.00153374	down	30	27	21	98	72	59
MYD88	Uncharacterized protein	242.19	509.538	0.475313	-1.07305	0.000214577	0.00153374	down	313	210	308	630	382	380
TMEM241	transmembrane protein 241	162.513	372.096	0.43675	-1.19512	0.000215204	0.0015374	down	222	151	178	399	264	337
FLVCR2	Uncharacterized protein	1386.93	616.861	2.24836	1.16887	0.000216675	0.00154626	up	1490	1336	1878	644	279	735
LOC101792481	uncharacterized LOC101792481	45.2533	6.82424	6.63126	2.72928	0.000218488	0.00155692	up	30	38	90	6	4	8
RNF150	Uncharacterized protein	134.276	50.148	2.67759	1.42093	0.000218518	0.00155692	up	153	87	239	47	32	54
FBXO42	F-box protein 42	445.474	911.268	0.48885	-1.03253	0.000218927	0.00155901	down	579	357	609	971	750	723
GNG12	Guanine nucleotide-binding protein subunit gamma	196.966	84.477	2.33159	1.22131	0.000219752	0.00156362	up	196	169	316	82	80	62
EYA3	Uncharacterized protein	374.333	775.826	0.482497	-1.05141	0.000219807	0.00156362	down	460	316	515	862	594	636
C9	Uncharacterized protein	802.866	175.094	4.58534	2.19703	0.000220963	0.00157017	up	1201	812	664	165	100	200
LOC101804808	Uncharacterized protein	74.1678	181.308	0.40907	-1.28958	0.000222378	0.00157939	down	79	48	138	149	148	177
BAG2	BAG family molecular chaperone regulator 2	113.556	35.4542	3.2029	1.67938	0.00022354	0.0015868	up	97	62	255	29	18	46
RRAD	Uncharacterized protein	1093.71	82.379	13.2765	3.7308	0.000224459	0.00159248	up	959	761	2172	109	63	55
MAPT	Microtubule-associated protein	128.842	44.6877	2.88316	1.52765	0.000224615	0.00159274	up	113	101	238	28	49	37
CPE	Uncharacterized protein	163.648	36.3702	4.49949	2.16976	0.000225019	0.00159477	up	246	163	138	66	34	5
GRTP1	Uncharacterized protein	451.566	200.778	2.24908	1.16934	0.000225275	0.00159574	up	485	380	698	216	167	156
NR2C1	Uncharacterized protein	370.427	169.395	2.18676	1.1288	0.0002254	0.00159578	up	428	296	565	182	131	142
EFNB2	Uncharacterized protein	67.1824	22.6387	2.9676	1.5693	0.000226242	0.00160067	up	78	62	89	18	19	22
LOC101797844	acyl-coenzyme A amino acid N-acyltransferase 2-like	35.351	118.291	0.298847	-1.74252	0.000226329	0.00160067	down	39	32	50	133	72	115
USP53	Uncharacterized protein	558.238	1487.77	0.375217	-1.4142	0.000226921	0.00160316	down	619	417	925	1452	913	1598
ROR1	Tyrosine-protein kinase transmembrane receptor	49.8871	2.93709	16.9852	4.08621	0.000227308	0.00160505	up	75	58	29	7	1	1
SLC22A2	Uncharacterized protein	183.433	14.6043	12.5602	3.65079	0.000228884	0.00161532	up	245	227	118	8	14	15
WDR91	WD repeat domain 91	191.786	398.886	0.480805	-1.05648	0.00023257	0.00163961	down	249	182	218	481	309	296
HDAC10	Uncharacterized protein	180.622	68.5758	2.6339	1.3972	0.000233054	0.00164216	up	255	157	206	74	62	48
KCNQ1	Uncharacterized protein	75.6219	25.7934	2.93183	1.5518	0.000233361	0.00164269	up	105	48	116	23	19	26
LOC101800725	ribosomal protein S6 kinase 2 alpha-like	63.8922	17.9423	3.56097	1.83227	0.000233374	0.00164269	up	89	48	86	4	12	28
DOCK10	Uncharacterized protein	43.6807	14.5863	2.99463	1.58238	0.000234135	0.00164718	up	92	35	22	26	13	3
C2CD2L	Uncharacterized protein	330.765	698.336	0.473648	-1.07811	0.000238574	0.00167665	down	451	247	458	780	572	531
NRGN	neurogranin (protein kinase C substrate, RC3)	1.93715	30.9907	0.0625076	-3.99983	0.000238865	0.00167781	down	3	1	3	22	27	31
LOC101794290	Uncharacterized protein	153.283	1.49609	102.455	6.67885	0.000242183	0.00169977	up	114	89	354	5	0	0
MICAL3	Uncharacterized protein	4477.28	1998.95	2.23981	1.16338	0.000242371	0.00169977	up	4839	3395	7474	2091	1184	2090
UBXN6	Uncharacterized protein	427.789	871.209	0.491029	-1.02612	0.000242985	0.00170318	down	564	350	565	959	689	698
COX3	Cytochrome c oxidase subunit 3	34894.2	73741.3	0.473197	-1.07949	0.000243135	0.00170335	down	43931	20530	60909	72473	51961	71918
PRRC1	proline-rich coiled-coil 1	481.367	963.514	0.499595	-1.00117	0.000243563	0.00170545	down	554	406	703	1102	890	610
LOC101792387	exocyst complex component 3-like protein 2-like	617.502	77.2688	7.99161	2.99849	0.000244364	0.00171017	up	613	390	1212	100	37	76
LOC101800490	Uncharacterized protein	762.493	1538.14	0.495725	-1.01239	0.00024489	0.00171295	down	938	587	1137	1566	1358	1178
SPTLC3	Serine palmitoyltransferase 3	8.7979	60.152	0.146261	-2.77338	0.000245359	0.00171534	down	9	10	10	101	37	34
RPS6KB1	Uncharacterized protein	445.932	909.999	0.490036	-1.02904	0.000246086	0.00171952	down	605	329	627	1088	578	813
CREB3L1	Uncharacterized protein	64.1332	23.7471	2.70068	1.43332	0.000247603	0.0017276	up	149	58	7	34	23	9
GNAI1	Uncharacterized protein	72.4593	20.0977	3.60535	1.85014	0.00024762	0.0017276	up	97	67	82	18	15	20
AGPAT2	1-acyl-sn-glycerol-3-phosphate acyltransferase	437.25	895.184	0.488448	-1.03372	0.000247628	0.0017276	down	536	392	567	960	786	655
RPTOR	Uncharacterized protein	463.65	962.052	0.481939	-1.05308	0.000248276	0.00173051	down	636	343	643	964	829	769
LOC101797703	Gap junction protein	7.96264	66.1236	0.12042	-3.05385	0.000248305	0.00173051	down	8	13	3	79	77	23
ICT1	Uncharacterized protein	93.9791	240.784	0.390305	-1.35733	0.000250946	0.00174802	down	144	62	126	299	154	206
LOC101793013	transmembrane protein 39A-like	211.306	457.427	0.461945	-1.11421	0.000251123	0.00174834	down	229	145	376	554	356	336
LOC101798971	Uncharacterized protein	257.038	14.8713	17.2842	4.11138	0.000251434	0.00174959	up	155	320	364	5	8	24
LOC101802140	40S ribosomal protein S21-like	450.553	921.83	0.488759	-1.0328	0.000252319	0.00175397	down	607	314	667	1064	636	799
SLC18B1	Uncharacterized protein	216.637	484.018	0.44758	-1.15978	0.000253995	0.00176467	down	257	249	204	471	482	330
LOC101798418	Uncharacterized protein	14.1664	134.46	0.105358	-3.24663	0.000254514	0.00176644	down	9	25	8	108	167	74
LOC101803365	Uncharacterized protein	56.2505	163.708	0.343602	-1.54119	0.000255108	0.00176965	down	75	45	75	171	138	129
LOC101796500	chromosome unknown open reading frame, human C1orf173	73.8317	18.6678	3.95503	1.98369	0.000258019	0.00178789	up	74	97	65	13	20	15
PUS7L	Uncharacterized protein	51.1152	147.783	0.34588	-1.53166	0.000258265	0.00178789	down	62	49	62	142	123	127
DSCR3	Uncharacterized protein	151.086	55.9857	2.69865	1.43224	0.000258272	0.00178789	up	199	126	196	86	30	42
LOC101789900	protein DGCR6-like	384.424	170.363	2.2565	1.17409	0.000258423	0.00178802	up	510	358	436	215	116	136
NR3C1	Glucocorticoid receptor	773.223	373.92	2.06788	1.04815	0.000258832	0.00178922	up	873	702	1069	419	263	328
NDC80	Uncharacterized protein	60.7095	9.06068	6.70033	2.74423	0.000258865	0.00178922	up	94	39	82	12	6	7
TDRP	Uncharacterized protein	58.7192	13.3308	4.40479	2.13907	0.000262546	0.00181373	up	92	55	51	18	5	14
SH3PXD2A	SH3 and PX domains 2A	26.7103	5.66179	4.71765	2.23807	0.00026364	0.00182036	up	51	24	15	9	5	2
RUFY2	Uncharacterized protein	229.909	94.1052	2.4431	1.28871	0.000265579	0.00183279	up	296	180	324	108	63	84
NOC3L	Uncharacterized protein	268.03	566.334	0.473271	-1.07926	0.000268682	0.00185326	down	355	208	370	676	469	394
CCNF	Uncharacterized protein	142.662	52.3792	2.72363	1.44553	0.000269642	0.00185812	up	187	119	186	60	32	50
LOC101796281	Histone H2A	167.515	66.5808	2.51597	1.33111	0.000269664	0.00185812	up	167	151	257	52	64	57
TUB	Tubby-like protein	84.4572	28.8166	2.93085	1.55132	0.000272094	0.0018739	up	104	84	96	21	42	11
POLR3B	DNA-directed RNA polymerase	279.417	561.848	0.497318	-1.00776	0.000274215	0.00188656	down	291	331	291	576	511	412
LOC101803213	chromosome unknown open reading frame, human C12orf4	401.407	185.165	2.16784	1.11626	0.000274696	0.0018889	up	463	387	509	183	172	137
LOC101802465	protein HEXIM1-like	433.895	193.331	2.24432	1.16628	0.000275125	0.00189089	up	501	392	591	235	146	146
PAAF1	Uncharacterized protein	121.766	293.085	0.415465	-1.2672	0.000277021	0.00190099	down	121	115	179	281	283	212
LOC101800035	Uncharacterized protein	73.3164	194.884	0.376206	-1.41041	0.000279564	0.0019155	down	73	97	64	182	177	156
UNC5C	Uncharacterized protein	132.956	54.3145	2.44788	1.29154	0.000281279	0.00192617	up	189	96	181	56	18	72
RALY	Uncharacterized protein	27.8327	1.95789	14.2157	3.82941	0.000283204	0.00193648	up	32	22	43	1	0	4
LOC101803538	26S proteasome non-ATPase regulatory subunit 6-like	270.256	575.665	0.469467	-1.0909	0.000283422	0.00193698	down	324	210	409	610	473	460
MMP11	Uncharacterized protein	46.6041	8.04757	5.79107	2.53383	0.000285316	0.00194893	up	32	42	87	10	6	6
LOC101803427	Uncharacterized protein	325.801	687.608	0.473819	-1.07759	0.00028618	0.00195384	down	480	212	462	768	534	553
VBP1	Uncharacterized protein	438.423	886.402	0.494609	-1.01564	0.000290947	0.00198436	down	534	334	665	1029	693	680
MMP16	Uncharacterized protein	239.641	528.715	0.453251	-1.14162	0.000291708	0.00198854	down	358	155	336	593	443	390
LOC101789401	uncharacterized LOC101789401	22.6259	0.299219	75.6165	6.24063	0.000291945	0.00198915	up	21	20	37	1	0	0
LOC101804220	uncharacterized LOC101804220	51.1627	3.46721	14.7561	3.88324	0.000296066	0.0020162	up	103	32	45	6	1	3
PTPRM	Uncharacterized protein	436.515	18.0831	24.1394	4.59332	0.000299024	0.00203427	up	359	631	378	22	23	4
CSNK2A1	Casein kinase II subunit alpha	308.802	646.729	0.477482	-1.06648	0.00029948	0.00203635	down	397	227	459	707	579	452
TFAP2C	Uncharacterized protein	21.8419	0	Inf	20	0.000300019	0.00203898	up	33	6	43	0	0	0
LOC101790011	histone H1.10-like	76.338	20.5235	3.71955	1.89513	0.000301223	0.00204612	up	69	61	137	15	21	17
LOC101801591	Uncharacterized protein	89.5517	0	Inf	20	0.000302598	0.0020538	up	32	134	115	0	0	0
CUTC	Uncharacterized protein	205.773	451.12	0.456137	-1.13246	0.000310802	0.00210542	down	268	159	290	493	350	371
CHRNA5	Uncharacterized protein	25.6474	1.14178	22.4626	4.48945	0.000310896	0.00210542	up	25	32	26	1	1	1
LOC101791427	coiled-coil domain-containing protein 166-like	54.8819	10.2782	5.33963	2.41674	0.000311143	0.00210603	up	74	46	69	12	4	12
INTS6	Uncharacterized protein	780.682	386.526	2.01974	1.01417	0.000311458	0.0021071	up	921	689	1068	410	291	336
PLA2G4B	phospholipase A2, group IVB (cytosolic)	1285.99	596.309	2.15658	1.10874	0.000311912	0.00210911	up	1502	966	2041	649	305	655
PNPLA6	Uncharacterized protein	65.7068	19.1508	3.43102	1.77864	0.00031252	0.00211109	up	79	55	93	16	20	14
LOC101803314	selenoprotein P-like	245.855	734.786	0.334595	-1.57951	0.000312809	0.00211197	down	178	382	197	757	713	490
NCOA4	nuclear receptor coactivator 4	16473.7	5303.06	3.10645	1.63527	0.000313848	0.00211792	up	14094	14495	28325	7028	3241	4373
EMC7	UPF0480 protein C15orf24-like protein	472.543	948.958	0.49796	-1.0059	0.00031601	0.00213144	down	608	416	594	949	774	805
ARRDC3	Uncharacterized protein	503.427	246.91	2.0389	1.02779	0.000317043	0.00213733	up	559	438	736	259	174	229
AKAP6	Uncharacterized protein	25.8958	1.74022	14.8808	3.89538	0.000319723	0.00215431	up	29	35	18	3	1	1
RAPGEF3	Uncharacterized protein	4.55046	37.3647	0.121785	-3.03759	0.000320238	0.0021567	down	2	9	2	40	39	21
MOK	Uncharacterized protein	269.8	119.841	2.25131	1.17076	0.000320494	0.00215721	up	284	259	373	107	119	89
EBF2	Uncharacterized protein	92.9058	1.72699	53.7963	5.74944	0.000320635	0.00215721	up	73	135	83	3	0	2
LOC101799088	laminin subunit alpha-4-like	58.3481	11.1663	5.2254	2.38554	0.000322313	0.00216632	up	75	51	74	16	12	3
HSPA14	Uncharacterized protein	162.566	366.46	0.443613	-1.17263	0.00032477	0.00218174	down	215	105	258	408	324	255
FDPS	Uncharacterized protein	1310.3	3018.63	0.434073	-1.20399	0.000325278	0.00218207	down	1479	1733	958	2905	2333	2776
FAM195A	family with sequence similarity 195, member A	123.557	359.127	0.344048	-1.53932	0.000325633	0.00218316	down	156	104	166	292	356	288
ALK	Tyrosine-protein kinase receptor	30.3403	3.29667	9.20332	3.20215	0.000325891	0.0021838	up	23	25	58	4	2	3
LOC101803945	DNA topoisomerase I, mitochondrial-like	47.0634	140.832	0.334181	-1.5813	0.000326774	0.00218862	down	54	46	59	146	134	96
LOC101800337	Uncharacterized protein	141.916	333.696	0.425284	-1.2335	0.00032794	0.00219314	down	181	104	213	327	275	285
LOC101799923	cytosolic carboxypeptidase 1-like	92.1331	26.7282	3.44704	1.78536	0.000328352	0.00219371	up	124	62	140	47	17	13
EMILIN2	Uncharacterized protein	119.556	45.8364	2.60832	1.38312	0.000329253	0.00219863	up	167	106	135	55	58	11
UBASH3B	Uncharacterized protein	28.5088	98.8392	0.288436	-1.79368	0.000331109	0.00220913	down	30	41	18	101	109	53
ETS2	Uncharacterized protein	165.597	373.454	0.44342	-1.17325	0.000331155	0.00220913	down	159	177	217	446	338	230
DLGAP5	Uncharacterized protein	54.7024	17.1215	3.19496	1.6758	0.000332088	0.00221425	up	86	38	68	22	13	12
MEI1	Uncharacterized protein	53.7842	7.81667	6.8807	2.78256	0.000336247	0.00223975	up	44	63	70	12	6	4
TTPAL	Alpha-tocopherol transfer protein-like	706.572	347.274	2.03463	1.02476	0.000337244	0.00224528	up	932	611	881	416	260	269
CHD1L	Uncharacterized protein	322.793	140.138	2.30339	1.20376	0.000339585	0.00225974	up	388	281	440	189	112	86
LOC101789545	Uncharacterized protein	141.366	323.186	0.437413	-1.19293	0.000340173	0.00226141	down	174	108	212	354	249	267
PHF19	Uncharacterized protein	54.5617	13.8587	3.937	1.9771	0.000344093	0.0022858	up	74	35	85	14	10	13
LOC101805164	U4/U6.U5 small nuclear ribonucleoprotein 27 kDa protein-like	66.1146	177.923	0.371592	-1.42821	0.000344184	0.0022858	down	86	50	95	187	161	128
PPAP2A	Uncharacterized protein	596.952	168.341	3.54608	1.82623	0.000346374	0.00229869	up	508	486	1091	199	137	121
LRRC39	leucine rich repeat containing 39	149.047	53.0808	2.80793	1.48951	0.000347115	0.00230185	up	160	141	206	48	43	49
GMNN	Uncharacterized protein	89.4687	23.4649	3.81287	1.93088	0.000349896	0.002318	up	112	78	117	28	12	24
AGT	Uncharacterized protein	15734.9	1411.85	11.1449	3.47831	0.00035699	0.00236149	up	14398	20435	15696	1610	1192	1013
LOC101798667	chromosome unknown open reading frame, human C9orf172	19.3363	1.15501	16.7412	4.06533	0.0003584	0.00236965	up	28	10	32	1	2	0
LOC101804696	non-muscle caldesmon-like	722.386	109.616	6.59013	2.72031	0.000359004	0.00237247	up	1250	646	549	130	111	56
BTF3	basic transcription factor 3	247.568	542.196	0.456603	-1.13099	0.000361637	0.0023887	down	231	174	474	529	402	511
LOC101794603	Uncharacterized protein	88.8627	29.3003	3.03282	1.60066	0.000363517	0.00239875	up	124	74	108	29	23	26
NFATC3	Uncharacterized protein	763.895	376.984	2.02633	1.01887	0.000365826	0.00241161	up	979	737	863	428	291	300
LOC101800766	immunoglobulin-like domain-containing receptor 1-like	18.9451	66.8744	0.283295	-1.81963	0.000368217	0.00242617	down	30	21	11	84	52	47
ACSS1	Acetyl-coenzyme A synthetase	32.7905	4.33623	7.56197	2.91876	0.000368802	0.00242884	up	45	29	38	6	4	2
WRNIP1	Uncharacterized protein	186.851	72.0187	2.59448	1.37545	0.000372007	0.00244754	up	199	185	247	83	56	56
GRPEL1	GrpE protein homolog	636.843	1347.64	0.472563	-1.08142	0.000373348	0.00245516	down	780	675	663	1306	1333	932
ARL9	Uncharacterized protein	139.833	56.8207	2.46095	1.29922	0.000373557	0.00245533	up	206	123	148	55	42	54
ZFAND4	Uncharacterized protein	246.812	109.826	2.24729	1.16819	0.000373861	0.00245612	up	309	208	334	115	90	89
LOC101794721	Uncharacterized protein	19.2474	0	Inf	20	0.000374146	0.00245659	up	27	6	39	0	0	0
LOC101790887	Uncharacterized protein	101.893	222.252	0.458457	-1.12514	0.000374299	0.00245659	down	121	89	140	252	161	188
UTP23	Uncharacterized protein	40.4146	116.032	0.348307	-1.52157	0.000376489	0.00246975	down	58	39	39	158	88	75
ATN1	Uncharacterized protein	136.69	53.1659	2.571	1.36233	0.000376935	0.00247147	up	181	111	181	52	53	36
LOC101797535	uncharacterized LOC101797535	15.9063	0	Inf	20	0.000377376	0.00247315	up	23	11	22	0	0	0
LMO7	Uncharacterized protein	590.872	1470.07	0.401935	-1.31496	0.000383774	0.00251019	down	754	355	1009	1737	996	1264
NDC1	Uncharacterized protein	308.118	625.695	0.492441	-1.02198	0.000383777	0.00251019	down	459	239	371	756	451	498
LOC101804125	uncharacterized LOC101804125	29.8424	4.02379	7.4165	2.89074	0.000386651	0.00252746	up	25	30	46	5	3	3
CD44	T-cell antigen CD44 isoform c	136.733	64.9583	2.10494	1.07378	0.000391108	0.0025544	up	254	118	92	86	50	43
LOC101795563	Uncharacterized protein	37.6936	3.96869	9.49773	3.24758	0.0003926	0.0025629	up	67	31	31	2	4	4
AMDHD1	Uncharacterized protein	833.15	250.379	3.32756	1.73446	0.000392988	0.00256418	up	727	907	1144	181	257	208
G2E3	Uncharacterized protein	108.983	36.5948	2.9781	1.57439	0.000393238	0.00256456	up	140	112	112	49	28	24
KLHL34	Uncharacterized protein	5.54496	41.1923	0.134612	-2.89312	0.000394556	0.0025719	down	8	3	9	48	22	42
TSKU	Uncharacterized protein	12.2468	247.853	0.0494114	-4.33901	0.000395118	0.00257432	down	7	17	15	137	309	180
HECW2	Uncharacterized protein	186.874	42.2874	4.41914	2.14376	0.000396035	0.00257904	up	285	108	276	64	25	30
SPSB3	Uncharacterized protein	111.989	273.637	0.409261	-1.28891	0.000399526	0.00260051	down	121	76	201	267	164	298
SDCCAG8	Uncharacterized protein	155.9	60.2194	2.58887	1.37232	0.000403399	0.00262317	up	218	119	206	64	64	33
PRKCA	Protein kinase C	617.775	297.872	2.07396	1.05239	0.000406896	0.00264402	up	715	521	898	368	213	233
MRPL32	Uncharacterized protein	104.38	257.739	0.404984	-1.30406	0.00040913	0.00265657	down	131	86	144	249	247	187
TBK1	Uncharacterized protein	454.216	223.524	2.03207	1.02295	0.000409468	0.00265748	up	476	356	756	209	164	219
LOC101803147	Uncharacterized protein	26.1447	2.02621	12.9032	3.68966	0.000411105	0.00266552	up	27	23	40	4	0	2
FURIN	Uncharacterized protein	322.996	649.448	0.497338	-1.0077	0.000414929	0.00268642	down	337	273	508	752	519	488
RASGEF1A	Uncharacterized protein	184.375	20.7349	8.89201	3.15251	0.000417574	0.00270223	up	244	225	126	33	6	20
TMEM194A	transmembrane protein 194A	68.0372	16.7142	4.07061	2.02524	0.000419384	0.00271263	up	66	59	110	18	10	17
[truncated: 977 more rows]

## Sheet: FBS-8d Vs DMSO-8d 
Sheet S2. Differnetially expressed genes in comparison of FBS-8d vs Con
AccID	Description	FBS_Normalized	DMSO_Normalized	FoldChange	Log2FC	P-Value	FDR	Style	D1_FBS	D2_FBS	D3_FBS	D1_DMSO	D2_DMSO	D3_DMSO
APOB	Putative apolipoprotein B	310.653	105941	0.00293231	-8.41375	9.53002e-141	1.28179e-136	down	205	210	515	131287	101752	125212
LOC101795489	uncharacterized LOC101795489	12.1263	5645.99	0.00214778	-8.86294	6.81677e-125	4.58428e-121	down	9	3	24	6411	5358	7402
AGR2	Anterior gradient protein 2-like protein	4873.31	34.8918	139.669	7.12587	2.53942e-98	1.13851e-94	up	4451	5280	4963	19	47	46
COL17A1	Uncharacterized protein	2147.31	6.16726	348.178	8.44368	2.37221e-96	7.97657e-93	up	1951	2140	2373	7	4	11
LOC101797246	coagulation factor X-like	5.01728	1878.98	0.00267021	-8.54883	3.69457e-96	9.93838e-93	down	3	3	9	2378	1620	2458
ACSBG2	Uncharacterized protein	315.764	24287.5	0.0130011	-6.26522	1.11208e-93	2.49292e-90	down	261	390	304	29297	21499	32436
HPD	Uncharacterized protein	81.1268	6221.55	0.0130396	-6.26095	6.61438e-83	1.27091e-79	down	22	71	151	5987	5524	9908
BCAS1	Uncharacterized protein	6872.1	123.349	55.7128	5.79994	9.6718e-79	1.62607e-75	up	7587	7130	5977	124	145	135
FETUB	Uncharacterized protein	55.6291	2667.85	0.0208516	-5.5837	7.42079e-68	1.109e-64	down	74	15	76	3245	2627	3117
LOC101802281	serine hydroxymethyltransferase, cytosolic-like	76.8753	3231.39	0.0237902	-5.39349	1.90153e-67	2.55756e-64	down	54	85	93	4110	2902	4023
LAMC2	Uncharacterized protein	49053.5	1532.71	32.0045	5.0002	8.99871e-65	1.1003e-61	up	49922	47266	50349	815	674	4227
ANXA13	Annexin	10528.9	354.76	29.679	4.89137	5.32094e-63	5.96389e-60	up	11890	10098	9669	608	307	292
CD44	T-cell antigen CD44 isoform c	4053.88	136.733	29.6481	4.88987	8.79384e-59	9.09825e-56	up	3607	4640	3991	254	118	92
MYOM3	Uncharacterized protein	1496.07	19.105	78.3078	6.29108	4.08652e-58	3.92598e-55	up	1279	1506	1720	29	10	30
LOC101799795	Uncharacterized protein	7.68749	390.84	0.0196691	-5.66792	5.27565e-57	4.7305e-54	down	14	6	3	380	316	667
GRIN3B	Uncharacterized protein	576.024	2.29295	251.215	7.97278	1.04994e-55	8.82602e-53	up	600	548	584	1	2	5
LOC101799608	cytosolic purine 5'-nucleotidase-like	20.0325	1057.4	0.018945	-5.72204	1.58463e-55	1.25372e-52	down	8	31	22	1170	1057	1335
SERPINE2	Uncharacterized protein	13037.1	618.871	21.066	4.39685	2.77359e-55	2.07249e-52	up	13123	12607	13485	787	672	588
GALNT7	Polypeptide N-acetylgalactosaminyltransferase	3376.23	140.033	24.1103	4.59158	2.45523e-53	1.67418e-50	up	3087	3869	3236	177	156	128
LOC101795619	uncharacterized LOC101795619	0.996666	334.07	0.00298341	-8.38882	2.48949e-53	1.67418e-50	down	1	1	1	471	294	376
SULF1	Uncharacterized protein	6772.65	332.805	20.3502	4.34697	5.55478e-53	3.55771e-50	up	7224	7462	5735	510	394	172
LOC101804974	Uncharacterized protein	6.20813	788.701	0.00787133	-6.98918	1.36535e-52	8.34725e-50	down	0	11	8	888	606	1266
SEPP1	Uncharacterized protein	110.202	2543.96	0.0433192	-4.52885	1.967e-51	1.15027e-48	down	132	83	115	3377	1988	3482
SERPINC1	Uncharacterized protein	101.12	5398.3	0.0187319	-5.73836	2.05953e-51	1.15419e-48	down	93	129	84	5441	5392	7392
FAM107A	Uncharacterized protein	18.2598	875.029	0.0208676	-5.58259	2.3645e-51	1.2721e-48	down	10	18	27	1106	745	1161
GK	ADP-dependent glucokinase	274.347	5365.29	0.0511336	-4.28958	3.8034e-51	1.96753e-48	down	234	397	202	5990	5650	6266
ALB	Preproalbumin	204.213	3900.01	0.0523623	-4.25533	9.91227e-51	4.93778e-48	down	171	101	337	3906	5394	3012
AMY2A	Alpha-amylase	218.939	4226.71	0.0517987	-4.27094	5.38531e-50	2.58687e-47	down	177	232	251	4770	3857	5815
LOC101800791	Uncharacterized protein	9.62426	551.271	0.0174583	-5.83994	7.68713e-50	3.56524e-47	down	8	10	11	760	543	548
LOC101804154	deleted in malignant brain tumors 1 protein-like	247.472	4623.31	0.053527	-4.22359	1.08656e-49	4.87143e-47	down	186	32	515	6331	3738	5924
GPD1	Glycerol-3-phosphate dehydrogenase [NAD(+)]	90.8733	2043.61	0.044467	-4.49112	2.36693e-49	1.02694e-46	down	141	35	94	2704	1647	2728
ADAM28	Uncharacterized protein	3068.52	155.313	19.7571	4.3043	2.2729e-48	9.55328e-46	up	3238	3460	2559	233	162	120
LOC101802349	Uncharacterized protein	27.9904	954.627	0.0293208	-5.09193	4.0369e-48	1.64534e-45	down	31	24	29	1374	757	1175
SLC7A2	Uncharacterized protein	39.295	1113.6	0.0352865	-4.82474	5.27305e-48	2.08596e-45	down	18	32	68	1373	1070	1323
LOC101793181	transmembrane protein 151B-like	655.271	6.18521	105.942	6.72712	1.34792e-47	5.17988e-45	up	521	740	717	6	6	9
AOAH	Uncharacterized protein	87.4795	1844.63	0.0474239	-4.39824	1.64792e-45	6.15679e-43	down	70	45	146	2047	1598	2709
TMPRSS6	Uncharacterized protein	6.35183	369.947	0.0171696	-5.864	1.21544e-44	4.41829e-42	down	4	4	11	441	389	403
HAAO	Uncharacterized protein	2.68607	305.912	0.00878054	-6.83147	1.92901e-43	6.82768e-41	down	1	1	6	354	310	363
LOC101792641	diacylglycerol O-acyltransferase 2-like	14.5533	586.074	0.0248318	-5.33167	2.59743e-43	8.9578e-41	down	6	17	21	639	549	808
F2	Prothrombin	918.006	11975	0.07666	-3.70538	8.98278e-43	3.02046e-40	down	1137	556	1048	11908	10563	18768
ADAM8	Uncharacterized protein	4346.27	92.824	46.8227	5.54914	1.54695e-42	5.07476e-40	up	4230	3776	5044	145	87	81
PAH	Uncharacterized protein	8.0763	2003.66	0.00403077	-7.95473	3.27611e-42	1.04913e-39	down	11	3	10	2176	2135	2366
ACPL2	acid phosphatase-like 2	2700.44	177.668	15.1994	3.92594	2.25375e-40	7.04951e-38	up	2526	3067	2557	277	123	224
PPP1R3C	Uncharacterized protein	156.998	2400.65	0.065398	-3.93461	2.35775e-40	7.20722e-38	down	130	197	148	3060	2080	3101
MOCS1	Uncharacterized protein	378.034	4482.16	0.0843419	-3.56761	5.55542e-40	1.66045e-37	down	326	410	404	4949	2980	8028
LOC101795304	Gallinacin-10	2446.8	32149.8	0.0761063	-3.71584	8.42685e-40	2.46394e-37	down	1741	2600	3037	39718	31352	37386
HMGCS2	Uncharacterized protein	20.6136	692.174	0.029781	-5.06946	2.82482e-39	8.08378e-37	down	5	18	39	672	633	1067
RAI14	Uncharacterized protein	5560.03	135.003	41.1844	5.36403	3.61167e-39	1.01202e-36	up	4393	6232	6156	174	163	100
PRPSAP2	Phosphoribosyl pyrophosphate synthetase-associated protein 2	85.6749	1463.02	0.0585604	-4.09393	4.33016e-39	1.18858e-36	down	52	84	122	1666	1375	1934
CDO1	Uncharacterized protein	55.9169	1001.3	0.0558442	-4.16245	4.45075e-39	1.19725e-36	down	63	69	37	1154	850	1452
TNC	Uncharacterized protein	6525	214.901	30.3628	4.92423	6.14174e-39	1.61973e-36	up	5361	7084	7234	461	159	120
COL12A1	Uncharacterized protein	24390.7	2106.6	11.5782	3.53334	7.92212e-39	2.04909e-36	up	24324	24808	24305	3137	1653	2508
FZD5	Uncharacterized protein	17.7515	468.872	0.03786	-4.72318	1.16712e-38	2.96185e-36	down	16	10	27	547	396	676
LOC101798271	Uncharacterized protein	23.9732	665.405	0.036028	-4.79474	1.64077e-38	4.08672e-36	down	22	21	29	785	555	961
COTL1	Coactosin-like protein	11762	794.62	14.8021	3.88773	2.44552e-38	5.98042e-36	up	11855	13879	9788	955	1040	536
EHHADH	Uncharacterized protein	82.3769	1216.41	0.0677212	-3.88425	1.17394e-37	2.81955e-35	down	67	64	116	1510	964	1756
ARHGAP31	Uncharacterized protein	844.537	7.76626	108.744	6.7648	6.78401e-37	1.60079e-34	up	639	997	916	13	4	11
LOC101799230	transmembrane protease serine 11E-like	263.281	0.764215	344.512	8.42841	7.76879e-37	1.80156e-34	up	288	276	229	1	0	2
FHL2	Uncharacterized protein	612.672	19.6741	31.141	4.96075	1.25191e-36	2.85394e-34	up	623	525	691	27	9	36
LOC101796257	Uncharacterized protein	1.33455	466.884	0.00285841	-8.45057	1.88432e-36	4.22401e-34	down	1	1	2	533	466	573
LOC101793498	uncharacterized LOC101793498	6.47811	1193.5	0.00542782	-7.52541	2.03523e-36	4.48752e-34	down	4	15	1	1666	1256	1038
LOC101792997	probable G-protein coupled receptor 173-like	1853.26	130.839	14.1644	3.8242	2.44748e-36	5.30945e-34	up	1569	2170	1859	198	101	155
LOC101792459	uncharacterized LOC101792459	0.975169	306.107	0.00318572	-8.29417	3.46114e-36	7.38925e-34	down	0	2	1	361	328	328
DPYS	Uncharacterized protein	19.7912	781.622	0.0253207	-5.30354	3.75229e-36	7.88568e-34	down	13	9	37	698	865	1034
TENM3	Uncharacterized protein	347.329	4212.55	0.082451	-3.60032	5.4083e-36	1.1191e-33	down	417	278	346	4580	3473	6565
SCUBE3	Uncharacterized protein	546.757	16.1545	33.8455	5.08089	1.22688e-35	2.50024e-33	up	478	527	640	27	7	25
QPCT	Uncharacterized protein	7251.78	686.106	10.5695	3.40183	2.08187e-35	4.17927e-33	up	7301	6750	7747	715	585	1072
HGD	Uncharacterized protein	78.8932	2662.94	0.0296263	-5.07698	4.68228e-35	9.26128e-33	down	85	54	97	3410	2607	2952
NUDT4	Uncharacterized protein	881.508	11501	0.0766465	-3.70564	9.90126e-35	1.93003e-32	down	683	1188	801	13238	8804	18203
PPP1R3B	Uncharacterized protein	42.8562	2513.49	0.0170505	-5.87404	1.22739e-34	2.35833e-32	down	38	60	32	2326	2534	3627
DMGDH	Uncharacterized protein	77.11	981.096	0.0785957	-3.66941	1.90454e-34	3.6079e-32	down	69	57	105	1115	858	1400
LOC101792645	Uncharacterized protein	586.46	29.1989	20.085	4.32805	2.35137e-34	4.39249e-32	up	542	631	595	51	24	25
SLC13A3	Uncharacterized protein	45.4534	743.888	0.0611024	-4.03263	3.39451e-34	6.25426e-32	down	30	47	60	1026	573	990
UPP2	Uridine phosphorylase	1.98881	4321.92	0.000460168	-11.0856	3.55903e-34	6.46878e-32	down	0	2	4	4023	3494	7568
ABLIM2	Uncharacterized protein	0.675761	229.522	0.00294421	-8.40791	3.90197e-34	6.99753e-32	down	0	0	2	268	235	266
PRICKLE1	Uncharacterized protein	1314.7	87.8933	14.9579	3.90284	8.3353e-34	1.47513e-31	up	1206	1564	1202	188	33	100
TUFT1	Uncharacterized protein	688.456	33.3239	20.6595	4.36873	1.23686e-33	2.16049e-31	up	607	799	673	43	26	47
KLF5	Uncharacterized protein	798.277	52.7134	15.1437	3.92065	3.57611e-33	6.1665e-31	up	806	857	743	72	38	75
FAH	Uncharacterized protein	82.1692	1076.06	0.0763612	-3.71102	5.8691e-33	9.99232e-31	down	48	55	143	1224	1010	1426
ENTPD1	Uncharacterized protein	10736.1	1113.29	9.64359	3.26957	6.70365e-33	1.12705e-30	up	9928	11127	11287	1104	746	2119
GUCY1A3	Guanylate cyclase soluble subunit alpha-3	3107.92	277.948	11.1817	3.48306	7.75701e-33	1.28805e-30	up	3083	3361	2925	347	130	541
OSGIN1	Uncharacterized protein	60.0872	3394.84	0.0176996	-5.82014	1.10665e-32	1.81518e-30	down	28	94	61	3163	3901	4124
ARAP2	Uncharacterized protein	487.958	17.8788	27.2925	4.77043	1.74943e-32	2.83492e-30	up	464	596	415	28	19	12
PTGER3	Uncharacterized protein	1008.24	72.2293	13.9589	3.80312	2.56753e-32	4.11111e-30	up	1075	1092	872	92	87	55
LOC101798958	Uncharacterized protein	1650.76	136.017	12.1364	3.60127	5.81382e-32	9.19952e-30	up	1493	1921	1571	159	81	249
LOC101796387	alpha-2-macroglobulin-like protein 1-like	20.8886	479.424	0.0435702	-4.52051	9.12511e-32	1.42713e-29	down	16	5	41	500	644	379
LOC101794341	Uncharacterized protein	224.923	9806.39	0.0229363	-5.44622	3.08125e-31	4.76354e-29	down	130	214	333	9668	9827	13609
TNKS1BP1	tankyrase 1 binding protein 1, 182kDa	371.108	10.8943	34.0645	5.0902	6.77485e-31	1.03547e-28	up	349	439	333	17	8	13
AMOTL1	Uncharacterized protein	1187.39	101.645	11.6818	3.54619	2.16355e-30	3.26963e-28	up	1232	1054	1280	117	93	137
APOH	Uncharacterized protein	795.317	8938.5	0.0889766	-3.49043	3.06086e-30	4.57428e-28	down	755	759	878	9484	9436	10933
TNFSF8	Tumor necrosis factor ligand superfamily member 8	455.384	26.0174	17.503	4.12953	3.78109e-30	5.58853e-28	up	432	494	447	48	23	17
LOC101797488	D-dopachrome decarboxylase-like	194.347	1849.73	0.105068	-3.25061	4.08693e-30	5.97492e-28	down	224	181	179	2078	1602	2690
SLC25A29	Uncharacterized protein	315.893	2941.32	0.107399	-3.21895	5.77283e-30	8.34888e-28	down	248	452	259	3529	2910	3467
FBN1	Uncharacterized protein	3978.28	463.225	8.58821	3.10236	1.34602e-29	1.92595e-27	up	4162	3735	4062	769	425	370
PDE10A	Uncharacterized protein	595.817	35.5638	16.7535	4.06639	1.5001e-29	2.12383e-27	up	580	676	542	45	45	24
NFIB	Nuclear factor 1	56.8326	712.916	0.0797186	-3.64894	1.89752e-29	2.65851e-27	down	50	55	66	810	543	1144
LOC101802134	Uncharacterized protein	3778.7	442.858	8.53253	3.09297	3.01245e-29	4.17705e-27	up	3814	3425	4114	606	393	513
WNT5B	Protein Wnt	623.487	36.8067	16.9395	4.08232	3.24881e-29	4.45883e-27	up	662	547	663	53	30	44
LOC101804105	Uncharacterized protein	27.5512	3177.44	0.00867086	-6.84961	3.30102e-29	4.48472e-27	down	8	9	65	3373	3482	3684
LOC101794092	Uncharacterized protein	254.667	2098.78	0.121341	-3.04286	4.1625e-29	5.59856e-27	down	253	263	251	2385	1728	3164
VTN	Uncharacterized protein	199.328	4347.95	0.0458441	-4.44712	5.60496e-29	7.46403e-27	down	128	104	363	3425	4990	5962
GRTP1	Uncharacterized protein	26.0487	451.566	0.0576852	-4.11566	5.73608e-29	7.56375e-27	down	13	35	31	485	380	698
EPCAM	Uncharacterized protein	1297.89	110.901	11.7031	3.54882	6.61826e-29	8.6423e-27	up	1380	1475	1061	156	127	79
LOC101795841	formin-2-like	1222.97	108.466	11.2752	3.49508	9.37774e-29	1.21279e-26	up	1172	1270	1242	147	76	159
PLA2G4A	Uncharacterized protein	1313.72	121.772	10.7884	3.43141	1.03746e-28	1.32894e-26	up	1197	1368	1393	208	92	122
FNDC1	Uncharacterized protein	1797.16	138.253	12.9991	3.70034	1.79991e-28	2.28385e-26	up	2048	1612	1737	189	93	207
IGF1R	Insulin-like growth factor 1 receptor	2116.45	227.773	9.29192	3.21598	1.93128e-28	2.42764e-26	up	2278	2149	1944	312	163	325
PANK1	Uncharacterized protein	87.0305	926.631	0.0939214	-3.4124	2.25031e-28	2.80247e-26	down	66	103	94	1121	854	1181
LOC101804032	macrophage-capping protein-like	660.483	45.0023	14.6767	3.87545	3.67794e-28	4.53838e-26	up	696	595	693	46	36	75
DOCK10	Uncharacterized protein	639.449	43.6807	14.6392	3.87176	1.02956e-27	1.25887e-25	up	565	707	657	92	35	22
LOC101796840	chromosome unknown open reading frame, human C3orf52	272.442	6.89588	39.5079	5.30407	1.09929e-27	1.33202e-25	up	215	283	323	8	2	16
LOC101799386	leucine-rich repeat and immunoglobulin-like domain-containing nogo receptor-interacting protein 1-like	2046.87	38.7775	52.7851	5.72206	1.11882e-27	1.34359e-25	up	1524	2375	2284	70	33	29
GPR112	Putative G-protein coupled receptor 112	12.0659	838.729	0.014386	-6.11919	1.25137e-27	1.48929e-25	down	3	23	11	884	939	948
LOC101799046	Uncharacterized protein	15.3422	1858.8	0.00825382	-6.92072	1.26229e-27	1.48929e-25	down	5	11	30	1814	2024	2346
PRPS2	Phosphoribosyl pyrophosphate synthetase 2	930.261	18285.3	0.0508748	-4.2969	2.32348e-27	2.71746e-25	down	602	1472	759	20504	19967	20141
LOC101792136	Cbp/p300-interacting transactivator 2	23.8193	354.132	0.067261	-3.89409	2.41124e-27	2.79579e-25	down	22	29	21	393	331	482
FAM83G	Uncharacterized protein	216.197	6.00692	35.9913	5.16958	2.67673e-27	3.07709e-25	up	211	238	203	10	6	4
B3GNT7	Uncharacterized protein	346.871	16.0318	21.6365	4.43539	3.64441e-27	4.15401e-25	up	334	415	299	16	18	19
GAMT	Guanidinoacetate N-methyltransferase	110.256	2103.14	0.0524246	-4.25361	4.60832e-27	5.1725e-25	down	61	107	164	2166	2225	2635
SSTR1	Uncharacterized protein	25.8912	1625.25	0.0159305	-5.97206	4.61487e-27	5.1725e-25	down	21	9	47	2110	1675	1639
BBOX1	Gamma-butyrobetaine dioxygenase	57.6745	656.309	0.0878771	-3.50837	5.6756e-27	6.30882e-25	down	48	11	112	876	513	893
LOC101803042	uncharacterized LOC101803042	647.99	4741.76	0.136656	-2.87138	1.03655e-26	1.14276e-24	down	475	551	920	5488	4301	6418
LOC101800013	Uncharacterized protein	1706.05	197.529	8.63693	3.11052	1.10692e-26	1.20951e-24	up	1798	1770	1570	369	176	122
AASS	Alpha-aminoadipic semialdehyde synthase, mitochondrial	211.554	1743.46	0.121341	-3.04286	1.11508e-26	1.20951e-24	down	230	183	222	2205	1399	2446
KNG1	Uncharacterized protein	54.8338	1159.64	0.0472851	-4.40247	2.87362e-26	3.09202e-24	down	94	6	62	1250	1276	1316
EGLN3	Uncharacterized protein	1001.39	6773.46	0.14784	-2.75789	4.77094e-26	5.09279e-24	down	710	1300	1023	7569	5791	10012
THBS1	Uncharacterized protein	36606.5	5160.35	7.09381	2.82656	4.98714e-26	5.28165e-24	up	39552	37799	32878	4880	2618	11396
PROZ	Uncharacterized protein	13.8843	1170.58	0.0118611	-6.39762	5.70249e-26	5.99207e-24	down	9	17	16	1346	1278	1254
LAD1	ladinin 1	1286.91	148.448	8.66916	3.11589	1.93948e-25	2.02217e-23	up	1199	1181	1488	255	125	127
NADK	Uncharacterized protein	860.08	5832.4	0.147466	-2.76155	2.37367e-25	2.45584e-23	down	918	819	849	6847	5528	7417
SERPINA10	Uncharacterized protein	1.63395	328.032	0.00498108	-7.64933	4.85064e-25	4.98023e-23	down	1	3	1	437	373	264
HFE2	Uncharacterized protein	14.062	287.342	0.0489381	-4.3529	6.08428e-25	6.19951e-23	down	11	8	23	299	237	462
GCAT	Uncharacterized protein	143.704	1165.08	0.123342	-3.01926	6.70782e-25	6.78347e-23	down	105	165	164	1208	1008	1804
BCKDHB	Uncharacterized protein	59.2437	652.988	0.0907271	-3.46232	7.65851e-25	7.68709e-23	down	57	71	51	736	619	863
TAT	Tyrosine aminotransferase	28.1839	13553.8	0.00207942	-8.90961	8.1482e-25	8.11803e-23	down	23	13	48	15518	16610	11743
IGF2	Insulin-like growth factor 2	11.213	275.73	0.0406664	-4.62002	8.54751e-25	8.45324e-23	down	6	15	13	330	232	390
DSP	Desmoplakin	3613.83	548.417	6.58957	2.72018	8.95665e-25	8.79321e-23	up	3560	3271	4027	721	666	385
LOC101803753	Uncharacterized protein	8.73961	193.177	0.0452413	-4.46621	9.12666e-25	8.89519e-23	down	14	4	8	213	170	281
SLC25A47	Uncharacterized protein	26.79	436.122	0.0614279	-4.02496	9.52459e-25	9.21624e-23	down	25	33	23	470	408	608
LOC101796826	Uncharacterized protein	23.242	2949.92	0.00787887	-6.9878	1.2796e-24	1.22933e-22	down	6	22	42	3538	1888	5098
PLEKHN1	pleckstrin homology domain containing, family N member 1	190.301	2.31059	82.36	6.36387	1.39372e-24	1.32947e-22	up	167	209	198	2	2	4
SYTL2	Uncharacterized protein	5499.18	807.718	6.80828	2.76729	1.44091e-24	1.36481e-22	up	4897	6328	5378	1156	493	1233
CDHR2	Uncharacterized protein	22.7688	367.966	0.0618774	-4.01444	1.87169e-24	1.76044e-22	down	19	13	36	365	353	533
AKR1D1	Uncharacterized protein	144.851	1301.92	0.111259	-3.16801	2.16505e-24	2.02221e-22	down	114	124	197	2087	988	1444
COL5A2	Uncharacterized protein	13046.8	2085.09	6.2572	2.64552	4.26434e-24	3.94163e-22	up	14250	12815	12183	2389	1871	2880
HAS2	Hyaluronan synthase 2	526.009	5.59867	93.9524	6.55386	4.27865e-24	3.94163e-22	up	571	387	617	5	2	14
LOC101804067	tensin-like	343.715	16.8472	20.4019	4.35063	4.52855e-24	4.14347e-22	up	402	306	324	32	13	13
LOC101800584	Uncharacterized protein	269.197	0.782165	344.169	8.42697	6.33466e-24	5.75683e-22	up	216	364	236	0	2	0
CREB3L1	Uncharacterized protein	673.487	64.1332	10.5014	3.39251	7.22909e-24	6.52559e-22	up	599	698	732	149	58	7
VAT1L	Uncharacterized protein	249.102	6.00692	41.4692	5.37397	1.29127e-23	1.15784e-21	up	298	259	193	10	6	4
TBC1D1	Uncharacterized protein	727.118	75.6414	9.6127	3.26494	1.31439e-23	1.17076e-21	up	687	678	821	96	72	88
LOC101791873	alcohol dehydrogenase 1-like	8.46466	976.091	0.008672	-6.84942	2.16859e-23	1.91892e-21	down	3	17	6	1160	630	1690
EFHD1	Uncharacterized protein	5684.47	923.908	6.15263	2.6212	2.45831e-23	2.16106e-21	up	5312	5351	6430	1015	876	1249
TCAIM	Uncharacterized protein	234.92	3062.49	0.0767087	-3.70447	2.78973e-23	2.43649e-21	down	213	231	263	4115	2230	4395
ANGPTL3	Uncharacterized protein	21.2332	1539.29	0.0137942	-6.17979	3.33201e-23	2.89132e-21	down	36	7	20	1630	1690	1784
ETV1	Uncharacterized protein	651.915	68.6584	9.49505	3.24718	4.46967e-23	3.85365e-21	up	695	689	580	71	47	126
GART	Uncharacterized protein	595.213	3754.78	0.158521	-2.65725	5.17642e-23	4.43458e-21	down	541	615	637	4297	3901	4356
PPP2R2B	Serine/threonine-protein phosphatase 2A 55 kDa regulatory subunit B	397.867	27.174	14.6415	3.87199	6.61939e-23	5.63486e-21	up	364	490	349	41	32	15
LOC101790164	vascular endothelial growth factor receptor 3-like	2747.64	397.042	6.92029	2.79083	9.33815e-23	7.89925e-21	up	2571	3095	2625	373	189	899
TPM4	tropomyosin 4	3193.17	528.275	6.04453	2.59563	1.17274e-22	9.84415e-21	up	2859	4137	2671	710	489	594
SLC40A1	Uncharacterized protein	256.51	5773.19	0.0444312	-4.49228	1.17837e-22	9.84415e-21	down	300	243	228	5061	4999	9923
LOC101793487	Uncharacterized protein	3.97195	181.693	0.0218607	-5.51551	1.19823e-22	9.94823e-21	down	6	5	1	221	167	231
LOC101794693	Uncharacterized protein	805.452	84.0123	9.58731	3.26113	1.37293e-22	1.13288e-20	up	723	808	894	101	41	165
UCHL1	Ubiquitin carboxyl-terminal hydrolase	2051.07	315.455	6.50195	2.70087	1.68369e-22	1.38083e-20	up	1846	2265	2076	379	353	307
ATP2A3	Uncharacterized protein	383.887	26.0362	14.7444	3.88209	1.77255e-22	1.4449e-20	up	452	384	319	41	24	23
SLC25A22	Uncharacterized protein	2474.99	385.847	6.41443	2.68132	1.92196e-22	1.55725e-20	up	2196	2822	2453	504	346	467
SYT11	Uncharacterized protein	7613.11	1092.12	6.97096	2.80136	2.64559e-22	2.13073e-20	up	6506	9302	7210	1558	917	1279
WFIKKN1	WAP, follistatin/kazal, immunoglobulin, kunitz and netrin domain containing 1	557.978	55.486	10.0562	3.33001	2.6661e-22	2.13447e-20	up	603	538	537	74	31	95
TFRC	Uncharacterized protein	1292.42	7402.91	0.174583	-2.51802	2.99227e-22	2.38143e-20	down	1397	2007	526	9877	6354	9185
HAL	Histidine ammonia-lyase	2.58989	1478.24	0.001752	-9.15678	3.13421e-22	2.47971e-20	down	1	6	1	1910	1709	1209
DAPK2	Uncharacterized protein	162.326	1129.49	0.143717	-2.7987	3.26509e-22	2.56816e-20	down	125	218	149	1298	1170	1310
KLF15	Uncharacterized protein	62.1867	575.513	0.108054	-3.21017	3.38542e-22	2.64732e-20	down	44	57	86	657	539	762
SPP2	Uncharacterized protein	10.6141	683.207	0.0155358	-6.00826	3.7483e-22	2.90877e-20	down	6	11	15	649	970	526
LOC101795582	Adenosylhomocysteinase	1638.49	10796.3	0.151764	-2.7201	3.76302e-22	2.90877e-20	down	1145	2395	1438	12648	11728	11408
CDK17	Uncharacterized protein	2059.04	320.512	6.42421	2.68352	3.88157e-22	2.98326e-20	up	1766	2263	2182	432	284	379
LOC101794825	uncharacterized LOC101794825	370.778	8130.21	0.045605	-4.45466	4.84554e-22	3.70299e-20	down	421	289	401	10187	7970	9236
TNIK	Uncharacterized protein	1549.19	237.932	6.51105	2.70289	6.86819e-22	5.20237e-20	up	1474	1824	1381	259	283	234
GSTZ1	Uncharacterized protein	143.045	1198.83	0.119321	-3.06709	6.88492e-22	5.20237e-20	down	149	99	180	1668	1197	1150
PLA2G4B	phospholipase A2, group IVB (cytosolic)	141.919	1285.99	0.110358	-3.17973	8.57662e-22	6.44444e-20	down	120	119	187	1502	966	2041
LOC101792200	Uncharacterized protein	3008.83	495.064	6.07767	2.60352	9.18379e-22	6.86233e-20	up	2518	3949	2646	524	674	369
AADAC	Uncharacterized protein	37.6151	1172.47	0.0320819	-4.9621	9.63653e-22	7.16085e-20	down	44	17	51	1290	1370	1177
F7	Uncharacterized protein	23.8895	327.865	0.0728637	-3.77866	1.60063e-21	1.18288e-19	down	19	25	28	351	316	445
LOC101804020	Uncharacterized protein	48.6531	442.313	0.109997	-3.18446	1.63265e-21	1.19995e-19	down	54	24	67	567	429	496
MGST2	Uncharacterized protein	13.02	192.04	0.0677988	-3.8826	1.64555e-21	1.20286e-19	down	7	9	23	209	131	342
BMP6	Uncharacterized protein	1213.26	164.561	7.37274	2.8822	1.7288e-21	1.25688e-19	up	1187	1232	1234	189	103	297
LOC101800663	PDZ and LIM domain protein 7-like	938.232	121.868	7.69876	2.94463	2.70486e-21	1.95593e-19	up	1060	848	910	159	111	145
PODXL2	Uncharacterized protein	1458.69	185.511	7.86308	2.9751	3.83141e-21	2.75575e-19	up	1296	1379	1712	250	143	253
SEC31B	Uncharacterized protein	261.751	1592.99	0.164314	-2.60547	4.34288e-21	3.10701e-19	down	221	295	274	1956	1420	2075
SLC44A2	Uncharacterized protein	1032.29	143.034	7.21713	2.85143	7.17087e-21	5.10308e-19	up	1107	1040	960	196	110	192
LOC101796579	ectoderm-neural cortex protein 1-like	559.256	63.9654	8.7431	3.12814	7.44168e-21	5.26793e-19	up	448	629	611	73	47	105
LOC101803913	Uncharacterized protein	1138.05	21.8609	52.0586	5.70206	8.35308e-21	5.88214e-19	up	1392	1179	855	26	21	27
LOC101793320	uncharacterized LOC101793320	42.333	386.052	0.109656	-3.18894	8.78554e-21	6.15445e-19	down	47	18	61	437	382	483
HNF4A	Uncharacterized protein	187.236	1202.04	0.155766	-2.68255	9.25921e-21	6.45266e-19	down	90	289	191	1465	858	1913
JAG2	Delta-like protein	537.014	51.134	10.5021	3.39261	1.40658e-20	9.75181e-19	up	549	550	518	51	26	110
RASEF	Uncharacterized protein	197.665	5.36636	36.8341	5.20297	1.64743e-20	1.13631e-18	up	213	218	165	14	1	5
PROSER2	proline and serine-rich protein 2	15.7781	436.115	0.0361787	-4.78872	1.96423e-20	1.3479e-18	down	18	25	5	532	472	441
LOC101795838	Ribonuclease CL2	1.63169	617.193	0.00264373	-8.56321	2.41312e-20	1.64754e-18	down	0	3	2	1101	665	256
ADSL	Adenylosuccinate lyase	367.004	2074.23	0.176935	-2.49871	2.87169e-20	1.95072e-18	down	350	389	367	2553	1944	2546
LOC101805199	hepatic lectin-like	135.11	2181.12	0.0619454	-4.01286	3.55027e-20	2.39956e-18	down	91	48	263	1879	2186	3317
MYO9A	Uncharacterized protein	527.726	58.7387	8.98429	3.16741	5.00403e-20	3.36521e-18	up	487	604	502	79	55	65
RNASET2	Uncharacterized protein	1379.73	221.467	6.22993	2.63922	6.62857e-20	4.43554e-18	up	1352	1626	1189	410	166	190
TIAM1	Uncharacterized protein	335.942	29.2549	11.4833	3.52146	6.83519e-20	4.55116e-18	up	385	269	353	32	32	33
ABLIM1	Uncharacterized protein	892.578	4543.69	0.196443	-2.34781	9.02072e-20	5.97678e-18	down	841	877	968	6250	3239	6475
LOC101790996	Alpha-1-antitrypsin	6.0479	494.316	0.0122349	-6.35285	9.41576e-20	6.20794e-18	down	2	2	14	651	562	406
ADCK3	Chaperone activity of bc1 complex-like, mitochondrial	97.4395	1306.47	0.0745822	-3.74503	9.64634e-20	6.32894e-18	down	93	92	108	1478	1211	1764
FBXO32	F-box only protein 32	409.037	39.1541	10.4468	3.385	9.70692e-20	6.33777e-18	up	455	447	331	47	42	41
ACBD5	Uncharacterized protein	335.361	1907.06	0.175852	-2.50756	9.965e-20	6.47484e-18	down	278	392	343	1950	1951	2509
BIN1	Uncharacterized protein	892.111	131.677	6.77499	2.76022	1.14254e-19	7.38806e-18	up	862	1097	738	181	109	164
LOC101800028	rho guanine nucleotide exchange factor 5-like	1690.26	176.347	9.5849	3.26076	1.92563e-19	1.23922e-17	up	1935	1500	1640	323	150	127
CMPK2	Uncharacterized protein	21.2509	244.002	0.0870931	-3.5213	2.85897e-19	1.8311e-17	down	5	20	39	180	185	497
MLXIPL	Carbohydrate response element protein	2.33121	122.082	0.0190954	-5.71063	4.7567e-19	3.03212e-17	down	2	2	3	153	129	124
MLPH	Melanophilin	205.027	6.89572	29.7325	4.89397	4.84349e-19	3.07288e-17	up	241	225	152	10	7	6
MGLL	Uncharacterized protein	906.697	5411.04	0.167564	-2.57721	5.9135e-19	3.73411e-17	down	450	1432	880	5713	4265	8923
SRPX2	Uncharacterized protein	214.161	9.89839	21.636	4.43536	5.99608e-19	3.76856e-17	up	212	221	212	21	11	0
LOC101804808	Uncharacterized protein	579.648	74.1678	7.81536	2.96631	6.98185e-19	4.36772e-17	up	588	569	587	79	48	138
LOC101789869	uncharacterized LOC101789869	321.733	25.3079	12.7127	3.6682	7.1041e-19	4.42362e-17	up	285	346	339	36	16	38
ARHGAP8	Uncharacterized protein	207.23	6.11417	33.8934	5.08293	7.25708e-19	4.49805e-17	up	172	278	178	6	9	4
TMEM63C	Uncharacterized protein	305.401	21.8234	13.9942	3.80676	9.42229e-19	5.81329e-17	up	355	325	240	40	19	15
DCAF7	Uncharacterized protein	2482.89	455.945	5.4456	2.44509	9.58004e-19	5.88363e-17	up	2468	2355	2643	564	317	730
ATIC	Uncharacterized protein	977.989	4818.21	0.202978	-2.30061	9.95916e-19	6.08867e-17	down	818	1124	1011	6305	4165	6064
ELOVL6	Long-chain elongase	305.796	1604.22	0.190619	-2.39123	1.01813e-18	6.19632e-17	down	220	394	312	1966	1335	2243
LOC101795636	Uncharacterized protein	245.14	3.1638	77.4827	6.2758	1.32064e-18	8.00115e-17	up	273	181	280	2	1	9
LOC101794808	Annexin	4990.51	128.056	38.9714	5.28434	1.62296e-18	9.7887e-17	up	3987	6721	4418	147	121	167
SORL1	Uncharacterized protein	31.8673	313.505	0.101649	-3.29834	1.93844e-18	1.16393e-16	down	29	33	34	458	270	345
ARNTL2	Uncharacterized protein	2299.29	425.881	5.39891	2.43267	1.97212e-18	1.17889e-16	up	1883	2416	2631	468	289	756
HPGD	Uncharacterized protein	30.8817	731.921	0.0421928	-4.56686	1.99553e-18	1.18761e-16	down	10	82	4	555	752	1165
EPHA2	Uncharacterized protein	842.334	112.061	7.51677	2.91011	2.19325e-18	1.29952e-16	up	797	1095	658	119	82	194
CAMK1D	Uncharacterized protein	60.1703	463.325	0.129866	-2.9449	2.79536e-18	1.64902e-16	down	44	74	64	543	347	735
CNDP2	Uncharacterized protein	528.963	2651.45	0.1995	-2.32554	3.05889e-18	1.7966e-16	down	584	393	607	3428	2160	3589
ZNF469	Uncharacterized protein	1629.42	64.8175	25.1387	4.65184	3.35971e-18	1.9647e-16	up	1581	1319	1987	83	57	82
LSP1	Uncharacterized protein	12732	2636.75	4.82867	2.27163	3.98008e-18	2.31741e-16	up	12721	12175	13394	4141	1725	3450
PGD	6-phosphogluconate dehydrogenase, decarboxylating	1006.49	4812.18	0.209156	-2.25735	4.07132e-18	2.36031e-16	down	1075	1060	897	5753	4632	5897
LOC101803465	Uncharacterized protein	11966	2331.59	5.13213	2.35956	4.3049e-18	2.48502e-16	up	13146	10767	12027	2425	1507	4404
SORD	Uncharacterized protein	194.169	1025.56	0.18933	-2.40103	7.50228e-18	4.31221e-16	down	114	230	243	1225	1108	1068
PHF17	PHD finger protein 17	217.524	1207.47	0.180149	-2.47274	7.9023e-18	4.52281e-16	down	199	273	186	1549	947	1705
RELN	Uncharacterized protein	36.9149	278.856	0.13238	-2.91725	7.93702e-18	4.52343e-16	down	55	2	52	364	304	253
LOC101792543	vascular endothelial growth factor receptor 3-like	857.669	128.148	6.69279	2.74261	9.225e-18	5.23528e-16	up	796	930	860	110	58	306
NRBP2	Uncharacterized protein	122.362	762.05	0.16057	-2.63873	9.4744e-18	5.35423e-16	down	76	182	114	1066	631	929
LOC101790227	neurabin-1-like	12498.8	2715.53	4.6027	2.20248	9.55981e-18	5.37989e-16	up	13158	13671	10853	3284	2324	3743
MAOA	Uncharacterized protein	6.3654	327.224	0.0194527	-5.68388	1.09255e-17	6.12283e-16	down	10	4	5	224	280	635
NMRK1	nicotinamide riboside kinase 1	168.859	978.606	0.172551	-2.53491	1.40406e-17	7.83595e-16	down	131	125	250	996	843	1541
PSAT1	Phosphoserine aminotransferase	1867.46	29079.1	0.0642201	-3.96083	1.49649e-17	8.31729e-16	down	2214	1648	1744	40084	29663	27309
IGFBP4	Uncharacterized protein	1202.65	25.9135	46.4101	5.53637	1.62849e-17	9.01363e-16	up	1221	892	1489	26	11	59
CCDC80	Uncharacterized protein	5391.2	1120.93	4.80957	2.26591	1.69264e-17	9.33034e-16	up	4665	6047	5557	1265	792	1905
CDON	Uncharacterized protein	1630.41	317.3	5.13839	2.36132	2.10464e-17	1.1554e-15	up	1621	1887	1414	391	291	399
FAM101B	Uncharacterized protein	13780.1	3104.89	4.43821	2.14998	2.14306e-17	1.17171e-15	up	14473	13802	13198	3396	3032	4075
SERTAD4	Uncharacterized protein	429.234	9.34915	45.9115	5.52078	2.2989e-17	1.25183e-15	up	494	315	476	8	14	7
LOC101803406	Uncharacterized protein	341.697	1691.72	0.201982	-2.3077	2.83884e-17	1.53962e-15	down	354	335	339	2045	1580	2125
FNDC3B	Uncharacterized protein	3407.33	718.771	4.74049	2.24504	4.10811e-17	2.21904e-15	up	3494	3477	3288	888	564	1051
GRK5	Uncharacterized protein	275.62	1378.51	0.19994	-2.32236	4.23028e-17	2.27589e-15	down	202	450	188	1527	1316	1836
RERG	Uncharacterized protein	644.524	3876.46	0.166266	-2.58843	4.42647e-17	2.37195e-15	down	813	525	594	5144	2683	5852
EDARADD	Uncharacterized protein	42.2336	334.205	0.12637	-2.98427	4.8846e-17	2.60706e-15	down	36	57	35	400	351	363
CORO2A	Coronin	228.575	19.5514	11.691	3.54732	5.38391e-17	2.86219e-15	up	178	223	287	16	20	30
MEX3A	Uncharacterized protein	170.662	6.66419	25.6088	4.67857	7.3286e-17	3.8807e-15	up	157	210	149	13	5	5
DAB1	Uncharacterized protein	41.0709	1748.36	0.023491	-5.41175	9.72004e-17	5.12684e-15	down	44	13	65	1485	1675	2803
LOC101803976	soluble scavenger receptor cysteine-rich domain-containing protein SSC5D-like	122.849	3723.84	0.03299	-4.92183	1.0132e-16	5.32324e-15	down	49	13	302	1432	4128	6943
DOK4	Uncharacterized protein	420.251	53.0884	7.91606	2.98478	1.05381e-16	5.5151e-15	up	387	383	493	63	61	50
CSRP1	Uncharacterized protein	1573.92	205.823	7.64697	2.93489	1.26102e-16	6.57392e-15	up	1294	1975	1493	291	153	275
PPAT	Uncharacterized protein	63.8987	755.986	0.0845236	-3.5645	1.32303e-16	6.87054e-15	down	71	59	62	865	902	694
LOC101792311	Uncharacterized protein	199.141	1236.25	0.161085	-2.6341	1.37226e-16	7.09879e-15	down	166	206	228	1578	1270	1282
LGALS3	Galectin	452.968	62.5765	7.23863	2.85572	1.59646e-16	8.22697e-15	up	362	506	499	95	73	35
LOC101789683	integrin alpha-3-like	188.398	10.5043	17.9353	4.16473	1.76284e-16	9.04969e-15	up	176	186	205	9	8	20
FDXR	Uncharacterized protein	80.8228	491.494	0.164443	-2.60434	1.96601e-16	1.00543e-14	down	71	75	97	592	420	681
LOC101804267	Uncharacterized protein	24.4068	385.955	0.0632374	-3.98308	2.01214e-16	1.02512e-14	down	17	33	24	361	354	608
MTTP	Putative microsomal triglyceride transfer protein	365.58	2275.7	0.160645	-2.63805	2.03792e-16	1.03434e-14	down	358	60	665	2687	2742	1958
LTBP1	Uncharacterized protein	27609.3	6412.08	4.30583	2.10629	2.82047e-16	1.42145e-14	up	25631	31322	26372	7891	4554	10159
PROC	Uncharacterized protein	260.689	1266.84	0.205779	-2.28083	2.82175e-16	1.42145e-14	down	270	233	280	1432	1183	1698
HIVEP3	Uncharacterized protein	700.258	37.0356	18.9077	4.2409	3.13642e-16	1.57406e-14	up	801	542	755	68	21	43
KLF12	Uncharacterized protein	116.694	676.738	0.172437	-2.53586	3.51899e-16	1.7595e-14	down	107	129	116	855	619	831
IL22RA1	Uncharacterized protein	675.914	76.4944	8.83612	3.14341	3.54564e-16	1.76626e-14	up	586	623	823	96	64	104
LOC101797313	glutathione S-transferase theta-1-like	224.839	1494.42	0.150452	-2.73262	3.58511e-16	1.77933e-14	down	343	138	190	1753	1522	1736
TLR7	Toll-like receptor 7	15.872	268.079	0.0592062	-4.07811	3.61905e-16	1.78957e-14	down	17	20	11	376	169	409
SLC37A4	Uncharacterized protein	346.516	1584.75	0.218657	-2.19326	3.96689e-16	1.95439e-14	down	262	425	361	1515	1401	2544
TGFB3	Uncharacterized protein	17871.1	4054.01	4.40825	2.14021	4.58634e-16	2.25132e-14	up	16054	18930	18878	4127	2201	8412
LOC101790096	uncharacterized LOC101790096	16.6236	190.179	0.0874103	-3.51605	5.3499e-16	2.61147e-14	down	8	15	27	176	185	285
XBP1	X-box binding protein 1	565.668	2534.97	0.223146	-2.16394	5.35885e-16	2.61147e-14	down	519	708	484	2643	2350	3663
AMDHD1	Uncharacterized protein	36.356	833.15	0.0436368	-4.51831	6.88786e-16	3.34447e-14	down	12	26	71	727	907	1144
LOC101805156	Thy-1 membrane glycoprotein	622.472	41.3214	15.0642	3.91305	7.58698e-16	3.67068e-14	up	753	628	492	55	30	60
LOC101805427	Uncharacterized protein	14.2267	657.554	0.0216358	-5.53043	7.64496e-16	3.68547e-14	down	11	17	15	783	801	545
UPB1	Uncharacterized protein	74.4736	460.305	0.161792	-2.62779	7.67792e-16	3.68814e-14	down	90	56	77	547	467	530
LOC101802247	uncharacterized LOC101802247	123.642	712.566	0.173516	-2.52686	7.83307e-16	3.74928e-14	down	101	136	136	780	644	1016
RSAD2	Radical S-adenosyl methionine domain-containing protein 2	44.7057	480.283	0.093082	-3.42535	7.96678e-16	3.79976e-14	down	20	32	82	428	435	788
PXDN	Uncharacterized protein	6553.92	1503.85	4.35809	2.12369	8.05897e-16	3.83015e-14	up	5836	7323	6616	1847	1036	2437
F8	Uncharacterized protein	1070.02	3.99889	267.58	8.06383	8.59286e-16	4.0695e-14	up	1355	671	1170	5	3	6
PRKAR1B	Uncharacterized protein	1660.55	258.381	6.42674	2.68409	9.17553e-16	4.33021e-14	up	1938	1482	1566	328	182	401
EZR	Uncharacterized protein	1971.83	301.105	6.54864	2.7112	1.05062e-15	4.94083e-14	up	1746	2649	1580	398	220	438
AGMAT	Uncharacterized protein	120.407	673.322	0.178826	-2.48337	1.08089e-15	5.0655e-14	down	115	95	151	746	640	901
ALDH6A1	Uncharacterized protein	677.758	2858.74	0.237082	-2.07654	1.09414e-15	5.1098e-14	down	525	801	722	3464	2250	4242
FTH1	Ferritin	11691.6	50145.6	0.233153	-2.10065	1.1066e-15	5.15011e-14	down	10144	13158	11982	34986	60258	69341
A1CF	Uncharacterized protein	529.551	2282.23	0.232032	-2.1076	1.1211e-15	5.1996e-14	down	415	448	727	2528	2169	3055
LOC101799876	inverted formin-2-like	3822.71	858.88	4.45081	2.15407	1.32074e-15	6.10447e-14	up	3768	4100	3654	1007	551	1507
EPSTI1	epithelial stromal interaction 1 (breast)	31.3568	311.933	0.100524	-3.31439	1.38208e-15	6.36609e-14	down	17	23	54	397	361	261
SLC43A2	Uncharacterized protein	954.23	3942.46	0.242039	-2.04669	1.4046e-15	6.44772e-14	down	1164	415	1261	4838	3059	5854
LOC101791543	1-acyl-sn-glycerol-3-phosphate acyltransferase	88.8255	1.6886	52.6029	5.71707	1.52978e-15	6.99849e-14	up	92	83	92	1	3	1
ARHGAP20	Uncharacterized protein	199.884	12.5815	15.8872	3.98979	1.57049e-15	7.16036e-14	up	174	221	208	28	8	8
PLXDC1	Uncharacterized protein	437.319	63.5082	6.88602	2.78367	1.93112e-15	8.77483e-14	up	411	447	459	39	69	105
SERINC2	Uncharacterized protein	910.999	191.044	4.76852	2.25354	1.95648e-15	8.86016e-14	up	871	889	981	211	164	284
PDGFA	Uncharacterized protein	1200.09	231.024	5.19468	2.37703	1.96678e-15	8.87689e-14	up	1317	1159	1133	323	125	386
DHTKD1	Uncharacterized protein	131.493	1276.61	0.103001	-3.27926	2.22471e-15	1.00075e-13	down	220	58	113	1950	1114	1291
LOC101794613	chromosome unknown open reading frame, human C12orf63	226.338	1.56371	144.744	7.17736	2.36505e-15	1.06033e-13	up	172	321	194	4	0	2
NDRG1	Uncharacterized protein	315.422	1391.47	0.226682	-2.14126	3.02011e-15	1.34952e-13	down	175	626	167	1367	1280	2116
TMEM132C	transmembrane protein 132C	2016.34	231.879	8.69562	3.12029	3.16976e-15	1.4117e-13	up	2001	1665	2383	313	183	309
GYG2	glycogenin 2	291.278	39.3138	7.40906	2.88929	3.59604e-15	1.59626e-13	up	322	300	255	50	48	29
COQ10B	Uncharacterized protein	164.742	889.437	0.185221	-2.43268	3.6641e-15	1.62112e-13	down	123	180	194	1135	554	1488
LOC101794647	Uncharacterized protein	8.89079	143.497	0.0619578	-4.01257	5.30756e-15	2.34055e-13	down	8	13	6	184	113	202
CHSY1	Uncharacterized protein	956.343	187.697	5.09514	2.34912	5.63637e-15	2.47742e-13	up	1066	803	1000	247	129	287
LOC101803527	tubulin beta-7 chain-like	2154.47	496.205	4.34189	2.11832	5.77113e-15	2.5284e-13	up	2250	2242	1997	714	333	706
SHROOM3	Uncharacterized protein	824.546	86.2372	9.56137	3.25722	6.07344e-15	2.6522e-13	up	614	997	882	80	47	187
LOC101802221	Uncharacterized protein	715.655	135.162	5.29479	2.40457	6.46083e-15	2.81224e-13	up	673	798	688	171	98	206
SLC51A	solute carrier family 51, alpha subunit	44.8889	306.714	0.146354	-2.77247	1.00095e-14	4.34283e-13	down	67	28	39	333	299	406
LOC101791686	Uncharacterized protein	3407.3	193.537	17.6054	4.13795	1.05459e-14	4.56086e-13	up	3361	2690	4164	318	205	115
LAMA3	Uncharacterized protein	12475.7	513.625	24.2895	4.60226	1.30424e-14	5.62243e-13	up	12984	9355	15030	454	360	1012
FANCI	Uncharacterized protein	555.046	95.6864	5.80068	2.53622	1.35535e-14	5.82412e-13	up	554	509	605	138	66	133
PDCD4	Uncharacterized protein	168.178	1307.6	0.128615	-2.95887	1.40711e-14	6.02728e-13	down	148	180	179	1304	1370	1705
DIO2	Iodothyronine deiodinase	222.216	4147.13	0.053583	-4.22208	1.50963e-14	6.44589e-13	down	159	323	193	5066	4741	3789
CNTN4	Uncharacterized protein	35.717	406.994	0.0877581	-3.51032	1.80337e-14	7.67574e-13	down	49	46	13	536	265	645
CD164	Uncharacterized protein	3380.61	13119.7	0.257674	-1.95638	1.88547e-14	7.99988e-13	down	2272	4951	3049	14275	12568	17682
C6	Uncharacterized protein	51.4426	428.109	0.120162	-3.05694	2.02694e-14	8.57305e-13	down	46	1	105	441	427	577
SH3TC1	SH3 domain and tetratricopeptide repeats 1	100.666	1418.89	0.0709469	-3.81712	2.2505e-14	9.48878e-13	down	74	45	181	1494	1625	1548
TTPA	Uncharacterized protein	1157.82	4435.6	0.26103	-1.93771	2.44469e-14	1.02753e-12	down	1438	490	1517	5918	3661	5733
LOC101792790	Uncharacterized protein	53.6191	316.966	0.169163	-2.56351	2.50875e-14	1.05117e-12	down	38	45	78	358	256	488
SLC18A2	Uncharacterized protein	3.61031	277.45	0.0130125	-6.26396	2.69184e-14	1.12439e-12	down	4	6	1	248	312	359
KLKB1	Uncharacterized protein	3.68952	94.4667	0.0390563	-4.6783	2.85832e-14	1.19023e-12	down	5	2	4	93	105	115
DBT	Uncharacterized protein	168.932	801.402	0.210796	-2.24608	3.18404e-14	1.32177e-12	down	144	193	173	965	670	1134
LOC101797392	keratin, type II cytoskeletal 80-like	695.177	127.775	5.44063	2.44377	3.20211e-14	1.32518e-12	up	605	748	743	113	83	262
LYPLAL1	Uncharacterized protein	157.256	710.998	0.221176	-2.17673	3.21201e-14	1.3252e-12	down	141	220	116	911	468	1146
ACSL1	Long-chain-fatty-acid--CoA ligase 1	791.719	3112.51	0.254367	-1.97502	3.80273e-14	1.56412e-12	down	632	914	845	3326	3054	4146
SMARCD3	Uncharacterized protein	58.0551	379.645	0.152919	-2.70916	3.99407e-14	1.63343e-12	down	61	63	51	489	362	433
TNS4	Uncharacterized protein	608.065	1.26193	481.853	8.91245	3.99553e-14	1.63343e-12	up	839	421	558	1	0	4
LOXL3	Uncharacterized protein	423.574	69.7799	6.07014	2.60173	4.02533e-14	1.64063e-12	up	393	492	394	66	94	62
DUSP6	Dual specificity protein phosphatase	396.873	63.6286	6.23734	2.64093	4.14013e-14	1.67698e-12	up	387	439	371	66	49	108
LOC101797203	Uncharacterized protein	42140	1430.94	29.4492	4.88016	4.1485e-14	1.67698e-12	up	34750	57981	35056	1801	767	2616
ABAT	Uncharacterized protein	174.22	2107.93	0.0826498	-3.59684	4.15193e-14	1.67698e-12	down	202	83	234	3319	1785	2111
SPARC	Uncharacterized protein	15919.6	3027.17	5.25889	2.39476	4.47946e-14	1.80386e-12	up	14539	15094	18245	2841	1767	6345
HKDC1	Uncharacterized protein	543.014	2351.74	0.230898	-2.11467	4.58104e-14	1.83925e-12	down	372	674	597	3512	2191	2246
LYN	Non-specific protein-tyrosine kinase	1060.05	154.278	6.87106	2.78053	4.72341e-14	1.89077e-12	up	854	1025	1311	259	155	99
ALCAM	Uncharacterized protein	3399.36	658.647	5.16113	2.36769	5.27031e-14	2.10343e-12	up	3434	4060	2775	1194	448	664
FILIP1	filamin A interacting protein 1	5375.54	1345.49	3.99523	1.99828	6.17639e-14	2.45776e-12	up	5204	5695	5300	1681	811	2332
P2RY4	pyrimidinergic receptor P2Y, G-protein coupled, 4	5.35743	95.6736	0.0559969	-4.15851	6.49514e-14	2.57698e-12	down	4	3	9	103	79	150
LOC101792387	exocyst complex component 3-like protein 2-like	2.61138	617.502	0.00422895	-7.88549	6.60572e-14	2.61314e-12	down	2	5	1	613	390	1212
SPAG6	Axoneme central apparatus protein	271.954	8.51252	31.9475	4.99763	7.34985e-14	2.89899e-12	up	322	198	294	15	2	15
MMEL1	Uncharacterized protein	1182.74	276.104	4.2837	2.09886	8.29493e-14	3.26219e-12	up	1212	1223	1127	212	321	378
WDR1	Uncharacterized protein	7581.12	1990.02	3.80957	1.92963	8.63246e-14	3.38503e-12	up	7285	8000	7559	2625	1413	2965
FGF13	Fibroblast growth factor	4.66243	330.624	0.0141019	-6.14797	8.85609e-14	3.46263e-12	down	4	4	6	461	348	288
XPOT	Uncharacterized protein	1495.98	6076.21	0.246202	-2.02208	1.05365e-13	4.10432e-12	down	1431	1845	1247	6828	4480	10064
PRDX3	Uncharacterized protein	710.174	2721.9	0.260911	-1.93837	1.05583e-13	4.10432e-12	down	667	889	592	3278	2331	3764
LOC101797566	Glutathione S-transferase	90.9035	2002.81	0.0453879	-4.46155	1.13179e-13	4.38691e-12	down	66	130	80	2728	2617	1014
ITPR3	Uncharacterized protein	1064.98	208.825	5.09989	2.35047	1.18616e-13	4.58444e-12	up	911	1232	1073	296	86	387
PKNOX2	Uncharacterized protein	42.693	311.674	0.13698	-2.86796	1.32111e-13	5.09139e-12	down	52	35	41	326	256	501
ACOX2	Acyl-coenzyme A oxidase	296.995	3209.09	0.092548	-3.43365	1.36277e-13	5.23694e-12	down	243	257	392	4928	2831	3169
HSD17B6	hydroxysteroid (17-beta) dehydrogenase 6	13.2787	144.904	0.0916381	-3.44791	1.44526e-13	5.53812e-12	down	6	13	21	173	147	166
FAM83H	family with sequence similarity 83, member H	1291.21	59.5549	21.6811	4.43836	1.54954e-13	5.92082e-12	up	1053	1801	1063	91	61	46
ADAMTS6	Uncharacterized protein	304.038	39.6322	7.67149	2.93951	1.57059e-13	5.98425e-12	up	318	251	343	60	35	40
SPNS2	Uncharacterized protein	136.536	8.06944	16.9201	4.08067	1.6063e-13	6.10302e-12	up	147	121	142	6	7	15
H6PD	Uncharacterized protein	85.3788	450.482	0.189528	-2.39952	1.61928e-13	6.13501e-12	down	79	85	93	486	409	647
WDHD1	Uncharacterized protein	263.892	31.8837	8.27671	3.04906	1.81572e-13	6.85996e-12	up	245	327	226	46	26	38
OSBPL1A	Oxysterol-binding protein	248.895	1014.55	0.245324	-2.02724	1.92628e-13	7.25728e-12	down	233	227	288	1242	1004	1169
GABRA4	Uncharacterized protein	27.1105	250.351	0.10829	-3.20703	2.00704e-13	7.54043e-12	down	21	51	11	294	177	413
ITGB6	Integrin beta	4849.87	21.3269	227.406	7.82913	2.01674e-13	7.55577e-12	up	5632	2861	5986	30	15	30
UBASH3B	Uncharacterized protein	446.777	28.5088	15.6715	3.97008	2.0225e-13	7.5563e-12	up	426	607	321	30	41	18
LAMP5	Uncharacterized protein	79.7032	619.34	0.128691	-2.95802	2.11128e-13	7.86614e-12	down	80	64	95	592	612	893
CISH	Uncharacterized protein	1257.63	213.228	5.89808	2.56025	2.12001e-13	7.87685e-12	up	874	1453	1472	221	191	320
F5	Uncharacterized protein	1908.01	9622.54	0.198286	-2.33435	2.17911e-13	8.07411e-12	down	1325	1315	3073	10742	7479	15410
LOC101803975	uncharacterized LOC101803975	1.01816	60.3877	0.0168605	-5.89021	2.2181e-13	8.19601e-12	down	2	0	1	108	42	61
DENND5B	Uncharacterized protein	201.751	837.914	0.240778	-2.05423	2.4823e-13	9.14712e-12	down	211	181	214	1084	653	1180
GC	Uncharacterized protein	79.6626	811.112	0.098214	-3.34793	2.59838e-13	9.53488e-12	down	136	20	80	1066	710	1002
LOC101796832	Uncharacterized protein	240.443	28.2593	8.50844	3.08889	2.60171e-13	9.53488e-12	up	203	294	230	34	37	19
FKBP9	Uncharacterized protein	1768.34	441.328	4.00686	2.00247	2.77901e-13	1.0157e-11	up	1724	2036	1578	612	385	513
ETNK2	Uncharacterized protein	15.3241	132.806	0.115387	-3.11544	2.7869e-13	1.01582e-11	down	14	13	19	120	142	182
AIF1L	Uncharacterized protein	314.251	32.9686	9.53184	3.25275	2.81169e-13	1.02209e-11	up	243	326	378	43	34	33
IL21R	interleukin 21 receptor	89.2481	13.8619	6.43839	2.6867	2.94489e-13	1.0655e-11	up	64	128	79	24	7	19
LOC101794802	uncharacterized LOC101794802	176.775	0.248858	710.346	9.47238	2.94697e-13	1.0655e-11	up	114	256	167	0	0	1
NFKBIA	Uncharacterized protein	133.511	620.644	0.215117	-2.21681	3.56346e-13	1.28495e-11	down	153	156	94	795	505	849
LOC101790017	C-type lectin domain family 18 member A-like	73.8995	0.391083	188.961	7.56195	4.11245e-13	1.47894e-11	up	61	100	63	0	1	0
JMJD7	jumonji domain containing 7	76.1094	378.207	0.201237	-2.31303	4.6923e-13	1.68297e-11	down	70	74	85	464	278	586
CRMP1	Dihydropyrimidinase-related protein 1	28.7535	407.949	0.0704831	-3.82658	4.81398e-13	1.72202e-11	down	26	54	8	463	440	452
RRAS2	Uncharacterized protein	2912.71	776.586	3.75066	1.90714	5.243e-13	1.87051e-11	up	2455	3511	2838	955	565	1210
PXN	Uncharacterized protein	1672.13	418.013	4.00019	2.00007	5.36053e-13	1.90738e-11	up	1351	1847	1847	421	313	737
SMOX	Uncharacterized protein	341.211	10.8593	31.421	4.97366	5.71179e-13	2.02701e-11	up	368	239	414	13	10	14
LOC101800070	inverted formin-2-like	647.468	129.174	5.01236	2.32549	6.00558e-13	2.12566e-11	up	655	652	642	150	76	239
LOC101801272	Serpin H1	4079.75	1106	3.68875	1.88313	6.08634e-13	2.14859e-11	up	3802	4179	4306	1327	905	1601
ABCC6	Uncharacterized protein	227.978	927.381	0.24583	-2.02427	6.10435e-13	2.14931e-11	down	219	171	293	1111	941	1058
CKB	Creatine kinase B-type	1465.43	106.154	13.8048	3.78709	6.34752e-13	2.22909e-11	up	1585	1835	1011	157	97	106
TSPAN12	Tetraspanin	316.934	1226.57	0.25839	-1.95238	6.43597e-13	2.25427e-11	down	302	334	319	1322	1106	1775
GALNT9	Polypeptide N-acetylgalactosaminyltransferase	131.622	3.23437	40.6947	5.34677	6.51374e-13	2.27558e-11	up	113	109	173	6	1	5
SLC16A12	Uncharacterized protein	64.9399	425.635	0.152572	-2.71244	7.3648e-13	2.56623e-11	down	71	40	83	472	467	471
MAP4K4	Uncharacterized protein	9073.73	2633.11	3.44601	1.78493	7.40518e-13	2.57364e-11	up	7718	10149	9514	3571	2617	2644
WDR52	WD repeat domain 52	714.142	96.4313	7.40571	2.88864	7.50703e-13	2.60231e-11	up	682	948	533	152	73	110
MAP4K5	Uncharacterized protein	2014.31	529.538	3.8039	1.92748	7.68027e-13	2.65552e-11	up	1863	2281	1935	699	424	713
LEPREL1	Uncharacterized protein	985.334	48.8552	20.1684	4.33403	7.88369e-13	2.71886e-11	up	1103	723	1124	75	14	94
PLEKHG1	Uncharacterized protein	424.308	35.1721	12.0638	3.59261	8.10695e-13	2.78871e-11	up	356	590	341	47	28	47
MDH1	Malate dehydrogenase	1201.07	4379.82	0.274228	-1.86655	8.12833e-13	2.78893e-11	down	1079	1379	1168	5103	4502	5060
CERCAM	Uncharacterized protein	129.354	6.64764	19.4586	4.28234	8.7216e-13	2.98487e-11	up	104	138	148	4	6	13
LOC101801953	uncharacterized LOC101801953	4054.75	63.7473	63.6066	5.99111	8.91553e-13	3.0435e-11	up	5374	3011	3751	109	48	64
DUSP5	Uncharacterized protein	327.685	43.3134	7.56546	2.91943	9.39069e-13	3.19759e-11	up	232	487	277	47	31	75
ALDH7A1	Uncharacterized protein	1128.82	4058.89	0.278111	-1.84626	9.85268e-13	3.34643e-11	down	853	1560	1011	4293	3723	5862
LOC101801610	protein FAM162B-like	527.649	125.562	4.20231	2.07118	9.94209e-13	3.36829e-11	up	580	496	510	185	111	132
LOC101800895	2'-5'-oligoadenylate synthase-like protein 2-like	24.2715	171.556	0.141478	-2.82135	1.01391e-12	3.42642e-11	down	13	22	38	128	186	260
CMBL	Carboxymethylenebutenolidase-like protein	0.994405	39.5274	0.0251574	-5.31287	1.01963e-12	3.4371e-11	down	0	1	2	48	48	32
CD81	Tetraspanin	225.681	937.438	0.240743	-2.05444	1.03574e-12	3.48266e-11	down	213	237	230	992	834	1394
LOC101789439	Uncharacterized protein	155.989	11.6935	13.3398	3.73767	1.08927e-12	3.65355e-11	up	194	134	140	22	6	14
PPIP5K1	Uncharacterized protein	43.6666	495.301	0.0881619	-3.5037	1.12007e-12	3.74751e-11	down	38	53	41	556	292	936
LOC101793867	leucine-rich repeat-containing protein 19-like	89.5846	412.934	0.216946	-2.20459	1.12344e-12	3.74944e-11	down	73	94	103	522	340	566
LOC101800800	uncharacterized LOC101800800	3.28941	114.707	0.0286765	-5.12399	1.15735e-12	3.85305e-11	down	3	5	2	140	133	102
BEAN1	brain expressed, associated with NEDD4, 1	961.965	54.7214	17.5793	4.13581	1.20592e-12	4.00486e-11	up	661	1113	1132	77	41	73
TOB1	Protein Tob1	374.666	1450.96	0.25822	-1.95333	1.23405e-12	4.08818e-11	down	321	444	367	1724	1353	1858
SPECC1	Uncharacterized protein	407.944	74.6972	5.4613	2.44924	1.28461e-12	4.2452e-11	up	427	360	438	113	86	44
LOC101794755	uncharacterized LOC101794755	84.1964	8.4421	9.9734	3.31809	1.30531e-12	4.30305e-11	up	65	57	130	11	9	8
AKAP12	Uncharacterized protein	9795.15	1318.96	7.4264	2.89266	1.49305e-12	4.90991e-11	up	11900	8987	8535	1310	730	2750
UNC5C	Uncharacterized protein	767.47	132.956	5.77238	2.52917	1.50038e-12	4.92199e-11	up	893	642	767	189	96	181
BMPER	Uncharacterized protein	11.2605	143.466	0.0784887	-3.67137	1.56754e-12	5.12978e-11	down	10	13	11	158	151	170
LOC101796191	protocadherin gamma-C3-like	545.467	110.011	4.95831	2.30985	1.79776e-12	5.86891e-11	up	544	514	582	164	90	125
FAM198B	Uncharacterized protein	3718.33	752.357	4.94225	2.30517	1.81829e-12	5.92155e-11	up	3575	4392	3264	650	233	1961
LOC101790887	Uncharacterized protein	485.474	101.893	4.76456	2.25234	1.92552e-12	6.25563e-11	up	461	514	488	121	89	140
LOC101805041	Uncharacterized protein	227.616	33.715	6.75117	2.75514	2.00453e-12	6.49659e-11	up	240	245	201	43	27	47
ANGPTL4	Uncharacterized protein	353.973	1356.52	0.260943	-1.93819	2.10024e-12	6.79044e-11	down	218	401	450	1693	1174	1793
YWHAG	Uncharacterized protein	1857.32	495.731	3.74662	1.90559	2.15876e-12	6.96292e-11	up	1712	2134	1761	671	370	692
TSPAN4	Tetraspanin	335.219	56.1593	5.96908	2.57751	2.16479e-12	6.96565e-11	up	309	403	301	94	56	37
PPM1K	Uncharacterized protein	170.979	1514	0.112932	-3.14647	2.29675e-12	7.37263e-11	down	161	194	161	1589	1666	1764
TMEM117	Uncharacterized protein	236.97	32.2336	7.35164	2.87807	2.53243e-12	8.10981e-11	up	279	220	213	86	13	17
CBR1	Uncharacterized protein	704.354	5678.95	0.124029	-3.01125	2.54812e-12	8.14067e-11	down	481	1117	547	7508	6374	4763
CAMKK2	Uncharacterized protein	312.9	1181.98	0.264726	-1.91743	3.00396e-12	9.57423e-11	down	284	243	411	1279	978	1843
ANKH	Uncharacterized protein	1138.32	3952.19	0.288023	-1.79574	3.03546e-12	9.65176e-11	down	1123	1221	1087	5002	3464	5081
HTR2A	5-hydroxytryptamine receptor 2A	53.6243	326.426	0.164277	-2.6058	3.15563e-12	1.00102e-10	down	27	61	74	352	339	402
HAO2	Uncharacterized protein	2.99	78.4989	0.0380897	-4.71446	3.18399e-12	1.00764e-10	down	3	3	3	123	38	124
NPAS2	Uncharacterized protein	36.9423	256.134	0.14423	-2.79355	3.19359e-12	1.00831e-10	down	32	33	46	255	219	412
LOC101793063	mucin-4-like	217.028	30.5873	7.09535	2.82687	3.2308e-12	1.01766e-10	up	180	279	198	37	25	44
LOC101800966	inter alpha-trypsin inhibitor, heavy chain 4-like	0.994405	30.0377	0.0331052	-4.9168	3.26741e-12	1.02679e-10	down	0	1	2	26	26	52
FAT2	Uncharacterized protein	478.31	4.01622	119.095	6.89596	3.59655e-12	1.12759e-10	up	327	695	431	8	1	6
NIT2	Uncharacterized protein	729.383	2592.38	0.281356	-1.82953	3.63139e-12	1.13586e-10	down	775	676	741	3340	2431	3020
TPM3	Uncharacterized protein	7522.33	2233.77	3.36754	1.7517	3.64619e-12	1.13785e-10	up	6946	8821	6952	2637	2030	2962
RAPGEF4	Uncharacterized protein	269.855	38.1215	7.0788	2.8235	3.67734e-12	1.14491e-10	up	306	235	269	57	30	45
LIPA	Uncharacterized protein	751.914	2685.09	0.280034	-1.83633	3.70864e-12	1.15199e-10	down	642	1105	537	3472	2741	2764
LOC101803807	collagen alpha-1(VIII) chain-like	17454	327.412	53.3088	5.7363	3.92875e-12	1.21755e-10	up	22920	12544	16754	539	272	311
SLC25A10	Uncharacterized protein	66.6232	313.416	0.212572	-2.23398	4.07626e-12	1.26036e-10	down	55	56	89	320	213	582
LOC101792621	Uncharacterized protein	1693.2	445.65	3.79939	1.92577	4.20288e-12	1.29653e-10	up	1786	1488	1810	450	306	828
CAT	Catalase	461.763	2592.84	0.178092	-2.48931	4.26391e-12	1.31235e-10	down	459	552	384	2769	2799	3055
AGXT2	Uncharacterized protein	19.7998	172.888	0.114524	-3.12628	4.50146e-12	1.3823e-10	down	12	26	22	262	142	191
MYO9B	Uncharacterized protein	3788.26	1088.81	3.47926	1.79878	4.6106e-12	1.41259e-10	up	3439	4851	3175	1403	836	1559
PHLDA2	Uncharacterized protein	1168.19	321.319	3.63559	1.86219	4.87235e-12	1.48939e-10	up	910	1435	1188	254	338	488
C2CD2	Uncharacterized protein	6729.83	1978.48	3.40152	1.76618	5.02269e-12	1.53186e-10	up	6355	7935	6037	2593	1509	2802
EXPH5	Uncharacterized protein	271.598	1448.83	0.18746	-2.41535	5.04362e-12	1.53477e-10	down	315	163	333	1638	1298	2028
ABR	Uncharacterized protein	370.911	71.4468	5.19142	2.37613	5.25611e-12	1.59582e-10	up	367	346	402	92	71	77
LOC101796516	Uncharacterized protein	313.294	25.3989	12.335	3.62468	5.32599e-12	1.61339e-10	up	193	405	351	21	22	45
ZNF385B	Zinc finger protein 385B	6.73723	94.624	0.0712	-3.81198	5.52388e-12	1.66958e-10	down	8	2	10	110	83	132
GALNT3	Polypeptide N-acetylgalactosaminyltransferase	373.95	40.0056	9.34744	3.22457	5.75085e-12	1.73428e-10	up	462	287	371	59	36	41
LOC101799146	keratin, type II cytoskeletal 5-like	144.606	7.71224	18.7502	4.22883	5.9572e-12	1.79249e-10	up	177	109	147	18	3	7
MGAT4B	Uncharacterized protein	650.098	3374.45	0.192653	-2.37592	6.18939e-12	1.8582e-10	down	359	1306	331	3626	3527	4134
SHMT2	Serine hydroxymethyltransferase	300.933	1117.28	0.269344	-1.89248	7.19769e-12	2.1561e-10	down	273	372	265	1265	1258	1158
FOXN3	Uncharacterized protein	366.556	1470.1	0.249341	-2.00381	7.32905e-12	2.19057e-10	down	329	322	450	1761	1518	1636
LOC101805313	calcineurin B-like protein 10-like	189.952	19.8694	9.56002	3.25701	7.50786e-12	2.23904e-10	up	144	242	189	30	17	21
IRF8	Interferon regulatory factor 8	611.261	78.843	7.75288	2.95473	8.27168e-12	2.46137e-10	up	577	470	785	76	41	171
FSCN1	Uncharacterized protein	187.97	8.72483	21.5443	4.42923	8.4518e-12	2.50942e-10	up	225	214	128	23	6	1
OAT	Uncharacterized protein	3034.65	9873.49	0.307353	-1.70203	9.30921e-12	2.75791e-10	down	2986	2785	3349	11597	8280	14244
FAM129B	Uncharacterized protein	701.771	52.1192	13.4647	3.75111	9.45696e-12	2.79552e-10	up	844	767	504	127	27	31
MSRB3	Methionine-R-sulfoxide reductase B3, mitochondrial	1081.48	277.878	3.89192	1.96048	9.82922e-12	2.89919e-10	up	982	1191	1089	359	240	355
FOXP4	Uncharacterized protein	816.013	199.339	4.09359	2.03337	1.07371e-11	3.16005e-10	up	909	720	821	258	150	289
CPN1	Uncharacterized protein	584.39	4142.88	0.141059	-2.82563	1.12766e-11	3.31157e-10	down	603	254	883	4113	3391	6914
GOT1	Aspartate aminotransferase	175.197	679.981	0.25765	-1.95651	1.35591e-11	3.9732e-10	down	157	185	186	934	646	717
LOC101803401	tubulin alpha-1C chain-like	4013.42	1178.54	3.40541	1.76783	1.35891e-11	3.97335e-10	up	3958	4220	3914	1814	870	1426
PAK6	Non-specific serine/threonine protein kinase	166.133	2.86123	58.0633	5.85955	1.40215e-11	4.08947e-10	up	219	119	159	5	2	3
LOC101802736	C-factor	36.9792	321.291	0.115096	-3.1191	1.40471e-11	4.08947e-10	down	18	47	47	565	147	455
SLMAP	Uncharacterized protein	3710	1102.82	3.36411	1.75022	1.48739e-11	4.32083e-10	up	3688	4452	3069	1415	891	1516
LOC101802865	Uncharacterized protein	236.628	1105.52	0.214043	-2.22403	1.49224e-11	4.32557e-10	down	195	263	256	1080	1200	1400
LOC101792372	A-kinase anchor protein 13-like	1210.65	333.619	3.62883	1.8595	1.5072e-11	4.35954e-10	up	1097	1375	1182	393	325	409
B3GNT2	UDP-GlcNAc:betaGal beta-1,3-N-acetylglucosaminyltransferase 2	1160.05	312.824	3.70832	1.89077	1.52929e-11	4.41395e-10	up	928	1368	1209	359	246	486
FAM49A	Uncharacterized protein	1815.19	381.873	4.75339	2.24896	1.6068e-11	4.62773e-10	up	2076	2013	1384	450	386	446
LOC101792818	Uncharacterized protein	438.865	1580.65	0.277648	-1.84867	1.6343e-11	4.69685e-10	down	349	535	443	1575	1601	2149
PGM1	Uncharacterized protein	201.223	753.623	0.267008	-1.90505	1.83286e-11	5.25628e-10	down	217	174	213	824	719	1016
IL17RA	Uncharacterized protein	1686.96	177.973	9.47873	3.24469	1.84632e-11	5.28361e-10	up	1988	1239	1823	256	140	221
SERPINA1	Serpin peptidase inhibitor clade A member 1	5.35743	1368.19	0.0039157	-7.99651	2.03603e-11	5.81415e-10	down	4	3	9	1939	1782	621
ENDOD1	Uncharacterized protein	2830.65	125.637	22.5304	4.4938	2.15203e-11	6.13237e-10	up	2055	3971	2564	143	45	281
SLC22A23	Uncharacterized protein	142.151	577.157	0.246295	-2.02154	2.25193e-11	6.40348e-10	down	141	127	159	708	434	879
LOC101791915	chromosome unknown open reading frame, human C10orf11	414.144	78.4837	5.27681	2.39967	2.28562e-11	6.48558e-10	up	460	428	359	106	54	117
LOC101801476	Uncharacterized protein	389.648	1393.46	0.279626	-1.83843	2.31455e-11	6.55383e-10	down	400	377	395	1536	1413	1734
LOC101804130	uncharacterized LOC101804130	172.211	2.36321	72.8717	6.18729	2.48519e-11	7.02222e-10	up	145	251	127	7	0	2
LOC101796324	uncharacterized LOC101796324	10.5994	122.399	0.0865974	-3.52953	2.71901e-11	7.66682e-10	down	8	12	12	175	104	141
FABP7	Uncharacterized protein	550.403	31.351	17.5561	4.1339	2.76612e-11	7.78334e-10	up	811	482	358	42	28	37
LOC101791784	membrane steroid-binding protein 1-like	2306.9	7318.25	0.315225	-1.66555	2.87431e-11	8.07087e-10	down	2301	2632	2029	9905	5897	9533
CBFB	Uncharacterized protein	455.031	101.096	4.50098	2.17024	2.90381e-11	8.13673e-10	up	378	506	489	98	88	163
IGSF3	Uncharacterized protein	949.461	139.44	6.80908	2.76746	2.99496e-11	8.37468e-10	up	1103	726	1015	216	112	153
PDLIM4	Uncharacterized protein	2642.1	347.466	7.6039	2.92674	3.13545e-11	8.74935e-10	up	2091	2729	3141	241	198	827
TYRO3	Receptor protein-tyrosine kinase	1578.78	434.519	3.63339	1.86132	3.31876e-11	9.24169e-10	up	1567	1456	1722	478	303	758
CDK14	Uncharacterized protein	687.961	172.448	3.98938	1.99616	3.43007e-11	9.53192e-10	up	664	849	567	231	141	224
LOC101798305	Uncharacterized protein	513.757	2214.64	0.231983	-2.10791	3.69507e-11	1.02471e-09	down	353	524	671	1715	2407	3280
CD28	Uncharacterized protein	153.968	8.17576	18.8322	4.23513	3.85827e-11	1.06777e-09	up	159	112	190	8	4	18
DCBLD1	discoidin, CUB and LCCL domain containing 1	831.233	224.93	3.69553	1.88578	3.99901e-11	1.10445e-09	up	878	979	653	316	223	215
LOC101799368	Uncharacterized protein	2115.79	177.694	11.9069	3.57373	4.13864e-11	1.14067e-09	up	1776	2897	1742	210	114	310
MAP3K4	Uncharacterized protein	171.92	671.639	0.25597	-1.96595	4.27733e-11	1.17648e-09	down	146	196	177	818	537	979
LAMA5	Uncharacterized protein	7736.46	250.071	30.9371	4.95127	4.31295e-11	1.18386e-09	up	10211	5907	7047	530	200	123
ITM2C	Uncharacterized protein	477.126	23.3006	20.477	4.35593	4.37962e-11	1.19971e-09	up	488	635	322	27	24	27
FAM3C	Uncharacterized protein	3696.23	1121.75	3.29505	1.7203	4.46971e-11	1.2219e-09	up	3742	3330	4032	1271	895	1740
LOC101795032	Uncharacterized protein	6.29864	81.5454	0.0772409	-3.69449	4.47892e-11	1.22194e-09	down	6	7	6	80	91	99
IRS1	Insulin receptor substrate 1	83.269	366.557	0.227165	-2.13819	4.65675e-11	1.26788e-09	down	68	88	95	390	326	543
SNTB1	Uncharacterized protein	217.151	950.543	0.228449	-2.13006	4.71365e-11	1.27822e-09	down	210	241	204	977	977	1238
FAM83B	family with sequence similarity 83, member B	72.6457	1.19058	61.0171	5.93114	4.71475e-11	1.27822e-09	up	75	79	65	3	1	0
PFKFB3	Uncharacterized protein	83.489	8.95714	9.32094	3.22047	4.72322e-11	1.27822e-09	up	44	144	67	14	7	10
XYLB	Uncharacterized protein	38.8138	330.376	0.117484	-3.08947	4.92306e-11	1.32962e-09	down	53	26	37	326	370	397
LOC101802795	Uncharacterized protein	49536.3	15840.9	3.12711	1.64483	5.03344e-11	1.35671e-09	up	45494	57866	46239	20093	12672	22223
PLD1	Uncharacterized protein	3308.64	1001.7	3.30302	1.72379	5.42026e-11	1.45805e-09	up	3453	2789	3686	1360	787	1332
SDPR	Serum deprivation-response protein	3136.98	923.691	3.39613	1.76389	5.44442e-11	1.46163e-09	up	3217	3447	2795	1265	595	1422
LOC101796582	probable phospholipid-transporting ATPase ID-like	463.178	103.598	4.4709	2.16057	5.57348e-11	1.49329e-09	up	423	562	415	127	88	142
GXYLT2	Glycosyltransferase 8 domain-containing protein 4	5476.05	1677.23	3.26493	1.70705	5.64432e-11	1.50927e-09	up	5699	5622	5168	2004	1205	2700
GNPAT	Uncharacterized protein	123.757	540.27	0.229064	-2.12618	5.93212e-11	1.58307e-09	down	113	149	112	630	655	467
CFI	Uncharacterized protein	17.7481	106.727	0.166294	-2.58819	6.07862e-11	1.61896e-09	down	23	11	19	131	106	122
GPR126	Uncharacterized protein	1697.07	322.708	5.25884	2.39474	6.40408e-11	1.70227e-09	up	1914	1302	1868	381	388	279
MAT1A	S-adenosylmethionine synthase	92.6764	2116.48	0.0437879	-4.51332	6.42225e-11	1.70373e-09	down	87	93	99	1981	2571	2343
TLL1	Metalloendopeptidase	310.78	1097.82	0.283088	-1.82068	6.62857e-11	1.75501e-09	down	287	336	314	1190	931	1674
ACSL5	Uncharacterized protein	3.36861	220.803	0.0152562	-6.03446	6.66601e-11	1.76145e-09	down	4	1	5	223	349	100
LOC101801959	protein S100-A6-like	1602.6	460.427	3.48068	1.79937	6.69416e-11	1.76542e-09	up	1632	1771	1430	550	331	741
MARVELD3	MARVEL domain-containing protein 3	102.343	444.961	0.230004	-2.12027	7.06141e-11	1.85863e-09	down	110	85	112	560	368	610
GCH1	Uncharacterized protein	28.7818	158.977	0.181044	-2.46559	7.29164e-11	1.91548e-09	down	13	51	24	213	164	153
GALNT1	Polypeptide N-acetylgalactosaminyltransferase	206.834	733.484	0.281988	-1.8263	7.61117e-11	1.99552e-09	down	220	234	170	928	575	1050
ABCB4	Uncharacterized protein	1.29381	31.0322	0.0416926	-4.58406	7.68586e-11	2.01118e-09	down	0	3	1	36	44	17
LTC4S	Uncharacterized protein	53.6844	283.903	0.189094	-2.40282	8.00127e-11	2.08588e-09	down	44	95	25	368	276	313
ABI1	Uncharacterized protein	1444.81	4491.65	0.321665	-1.63637	8.00235e-11	2.08588e-09	down	1665	1248	1423	5196	3499	6986
SYNPO	synaptopodin	270.243	22.4298	12.0484	3.59077	8.50522e-11	2.21267e-09	up	239	365	215	24	13	44
LOC101795816	alpha-2-macroglobulin-like	10.0425	76.5883	0.131123	-2.93101	8.63407e-11	2.24186e-09	down	1	5	24	57	52	165
PTGFR	Prostaglandin F2-alpha receptor	557.599	88.6458	6.29019	2.6531	8.94637e-11	2.31847e-09	up	536	462	675	150	71	84
PQLC3	PQ loop repeat containing 3	464.946	111.078	4.18578	2.0655	9.55867e-11	2.47239e-09	up	437	542	425	160	91	132
ASAP2	Uncharacterized protein	766.837	48.7484	15.7305	3.97549	9.62045e-11	2.48359e-09	up	681	1054	590	79	32	61
CDCP1	CUB domain containing protein 1	1115.52	251.409	4.43708	2.14961	9.73883e-11	2.50933e-09	up	1251	1016	1084	354	177	353
LOC101793232	plasma membrane calcium-transporting ATPase 1-like	487.569	118.778	4.1049	2.03735	9.93104e-11	2.55397e-09	up	382	589	503	137	92	186
GNB5	Uncharacterized protein	762.798	4080.44	0.18694	-2.41935	1.06809e-10	2.74156e-09	down	681	860	761	3933	3452	6760
USH1C	Uncharacterized protein	57.2857	305.856	0.187296	-2.41661	1.1162e-10	2.8596e-09	down	68	16	86	361	258	437
LOC101803159	neuron navigator 1-like	171.365	19.2474	8.90326	3.15433	1.21321e-10	3.10223e-09	up	118	204	196	29	18	18
LOC101804971	Uncharacterized protein	501.401	51.1834	9.79617	3.29222	1.27885e-10	3.26386e-09	up	593	369	539	82	40	55
NUDT5	Uncharacterized protein	332.099	1097.92	0.302479	-1.72509	1.28536e-10	3.27425e-09	down	316	285	396	1504	1094	1082
LOC101805212	tubulin alpha-1B chain-like	4709.24	1507.02	3.12487	1.6438	1.31099e-10	3.33215e-09	up	4189	5330	4694	1994	1264	1934
PIK3C2G	Uncharacterized protein	99.9967	8.83382	11.3198	3.50077	1.31304e-10	3.33215e-09	up	30	180	96	5	2	27
FGA	Fibrinogen alpha chain	119.78	2190.9	0.0546718	-4.19306	1.41584e-10	3.58626e-09	down	152	9	193	2830	2457	1912
COL8A2	Uncharacterized protein	61.2142	0	Inf	20	1.44376e-10	3.6501e-09	up	84	42	57	0	0	0
SERPIND1	Uncharacterized protein	1668.55	5187.06	0.321675	-1.63632	1.47227e-10	3.7152e-09	down	1391	1915	1732	6049	4659	7044
PPP1R12A	Uncharacterized protein	2826.35	875.163	3.22951	1.69131	1.52133e-10	3.83182e-09	up	2533	3285	2717	1150	653	1259
SLC35A3	Uncharacterized protein	1004.04	3135.53	0.320215	-1.64289	1.60771e-10	4.04183e-09	down	916	993	1113	3505	2772	4490
CD109	Uncharacterized protein	313.348	27.7401	11.2958	3.49772	1.6545e-10	4.15168e-09	up	390	320	233	59	18	20
MYPN	Uncharacterized protein	7.29079	70.9507	0.102758	-3.28267	1.66849e-10	4.17285e-09	down	5	8	9	76	45	133
CHRM2	Muscarinic acetylcholine receptor	2.01257	382.954	0.00525539	-7.57199	1.66914e-10	4.17285e-09	down	2	1	3	493	488	244
ENPEP	Uncharacterized protein	66.215	1146.27	0.0577659	-4.11364	1.68549e-10	4.2059e-09	down	42	23	132	1695	1104	1056
TTC25	Uncharacterized protein	125.212	20.0307	6.25103	2.64409	1.74622e-10	4.34938e-09	up	108	143	127	21	21	25
ITGAV	Uncharacterized protein	16750	5358.97	3.1256	1.64413	1.76816e-10	4.3959e-09	up	17232	15783	17342	6271	3583	9188
MAP4	Microtubule-associated protein	3660.24	1142.12	3.20478	1.68023	1.78749e-10	4.43574e-09	up	3596	3726	3699	1297	825	1904
ADK	Adenosine kinase	1575.53	4853.71	0.324604	-1.62325	1.82758e-10	4.52689e-09	down	1645	1265	1814	6062	4471	5986
UNC13D	Uncharacterized protein	111.555	8.54842	13.0498	3.70596	1.84699e-10	4.56656e-09	up	123	117	96	13	6	11
SLC30A10	Uncharacterized protein	132.687	2652.53	0.0500227	-4.32127	1.85958e-10	4.58552e-09	down	131	126	142	2698	3273	2626
LOC101791960	Uncharacterized protein	181.062	27.1368	6.67217	2.73816	1.86148e-10	4.58552e-09	up	181	164	199	53	32	2
ZNF704	Zinc finger protein 704	205.27	851.512	0.241066	-2.0525	1.90646e-10	4.68772e-09	down	203	243	174	861	918	1057
MAFF	v-maf musculoaponeurotic fibrosarcoma oncogene homolog F (avian)	97.3379	10.0953	9.64193	3.26932	1.95942e-10	4.80915e-09	up	81	131	83	10	5	22
ACSM4	Uncharacterized protein	15.3728	99.3485	0.154736	-2.69212	1.99141e-10	4.87877e-09	down	10	10	26	142	107	79
PRDM1	PR domain zinc finger protein 1	70.9133	1.72358	41.1431	5.36258	2.05752e-10	5.03158e-09	up	73	81	60	5	1	0
LOC101797166	Uncharacterized protein	630.045	73.7413	8.54399	3.09491	2.17541e-10	5.31022e-09	up	513	575	806	77	40	151
PAPSS1	Uncharacterized protein	1296.94	175.861	7.3748	2.8826	2.19501e-10	5.34835e-09	up	1644	1081	1164	235	168	191
TRIM67	Uncharacterized protein	4.30983	93.9964	0.045851	-4.4469	2.39106e-10	5.81552e-09	down	6	5	2	149	72	105
KIAA2022	KIAA2022 ortholog	115.92	8.31751	13.9369	3.80084	2.48562e-10	6.03458e-09	up	123	136	91	12	8	8
AK5	Uncharacterized protein	106.358	7.23388	14.7027	3.87801	2.55144e-10	6.18322e-09	up	95	138	89	7	8	9
SLC25A27	Uncharacterized protein	8.97793	94.7479	0.0947559	-3.39964	2.63434e-10	6.37263e-09	down	4	8	15	115	92	113
DHX37	Uncharacterized protein	454.632	1461.12	0.311154	-1.6843	2.72311e-10	6.57555e-09	down	499	418	449	2028	1266	1710
RGS14	Uncharacterized protein	178.495	23.9234	7.46109	2.89939	2.77208e-10	6.68181e-09	up	171	226	143	22	22	38
LOC101793166	Uncharacterized protein	1.98881	185.626	0.0107141	-6.54435	2.97894e-10	7.16757e-09	down	0	2	4	188	155	301
RAB20	Ras-related protein Rab-20	105.218	419.683	0.250708	-1.99592	3.00582e-10	7.21932e-09	down	118	77	120	445	411	564
PTK7	Uncharacterized protein	950.148	270.306	3.51509	1.81356	3.05469e-10	7.32364e-09	up	865	996	1002	347	183	427
TXNDC12	Uncharacterized protein	2199.35	719.001	3.0589	1.61301	3.1018e-10	7.42335e-09	up	2330	2465	1839	794	740	876
NOXA1	Uncharacterized protein	303.863	38.9215	7.80707	2.96478	3.18118e-10	7.59101e-09	up	257	411	253	58	39	33
PLS3	Uncharacterized protein	8742.48	2845.9	3.07195	1.61916	3.18314e-10	7.59101e-09	up	8973	8617	8715	3478	2053	4485
APBA2	Uncharacterized protein	177.99	22.1789	8.02522	3.00454	3.2099e-10	7.64126e-09	up	198	150	186	40	18	18
DIO3	Iodothyronine deiodinase	276.902	0.266499	1039.04	10.021	3.30647e-10	7.85726e-09	up	196	207	427	1	0	0
NPC2	Uncharacterized protein	1012.45	299.755	3.37761	1.756	3.32019e-10	7.87594e-09	up	1020	972	1053	398	291	321
GPR68	Sphingosylphosphorylcholine receptor	60.6899	1.54638	39.2464	5.29449	3.65531e-10	8.65561e-09	up	43	82	59	1	2	2
MARCKSL1	MARCKS-like 1	280.454	52.8719	5.3044	2.40719	3.73341e-10	8.82502e-09	up	285	349	214	85	48	46
DAAM2	Uncharacterized protein	352.638	74.1857	4.75345	2.24898	3.75907e-10	8.87009e-09	up	304	340	417	80	62	115
LOC101805287	LON peptidase N-terminal domain and RING finger protein 1-like	77.6171	380.235	0.204129	-2.29244	3.95115e-10	9.29495e-09	down	71	66	96	339	383	563
VEGFC	Uncharacterized protein	179.64	23.4244	7.6689	2.93902	3.95294e-10	9.29495e-09	up	161	218	164	30	14	40
ENC1	Uncharacterized protein	491.094	52.7865	9.30341	3.21776	4.23923e-10	9.95073e-09	up	400	443	633	56	30	105
SLC1A2	Amino acid transporter	249.223	41.1242	6.06024	2.59937	4.26147e-10	9.98549e-09	up	237	228	284	66	22	60
LOC101790919	Zinc finger protein RFP	235.113	49.0667	4.7917	2.26054	4.30869e-10	1.00786e-08	up	205	220	282	91	31	51
LOC101803241	Ubiquitin carboxyl-terminal hydrolase	276.045	928.345	0.297352	-1.74976	4.41083e-10	1.02996e-08	down	215	447	179	1194	815	1171
LOC101791163	alpha-N-acetyl-neuraminyl-2,3-beta-galactosyl-1,3-N-acetyl-galactosaminide alpha-2,6-sialyltransferase-like	188.813	31.1915	6.05336	2.59774	4.43151e-10	1.03299e-08	up	193	184	191	39	29	38
WDR18	WD repeat domain 18	187.39	26.3039	7.12403	2.83269	4.49914e-10	1.04694e-08	up	171	150	241	32	20	40
HSD11B2	Uncharacterized protein	18.7561	155.846	0.12035	-3.05469	4.55493e-10	1.0581e-08	down	12	10	34	229	119	194
XKR9	XK-related protein	277.456	57.6935	4.80914	2.26578	4.62644e-10	1.07286e-08	up	281	276	278	54	63	75
LOC101799544	protein snail homolog Sna-like	308.33	62.1196	4.9635	2.31136	4.7027e-10	1.08866e-08	up	262	355	314	51	42	129
ALDH2	Uncharacterized protein	868.6	2605.82	0.333331	-1.58497	4.7557e-10	1.09904e-08	down	986	630	984	3536	2083	3411
EPS8	Uncharacterized protein	1051.32	315.753	3.32957	1.73534	4.912e-10	1.13321e-08	up	1055	1116	997	396	290	389
CTDSPL	Uncharacterized protein	475.305	1535.56	0.309533	-1.69183	5.22818e-10	1.20409e-08	down	505	556	374	1862	1586	1684
ST5	Uncharacterized protein	1694.26	479.391	3.53419	1.82138	5.26365e-10	1.21019e-08	up	1420	1706	1976	563	307	841
ZBTB16	Uncharacterized protein	13.5272	369.143	0.0366449	-4.77024	5.30358e-10	1.21729e-08	down	9	18	14	319	248	752
LRRK1	Uncharacterized protein	256.402	46.8849	5.46876	2.45121	5.57311e-10	1.27697e-08	up	204	290	280	60	51	44
PDGFB	Uncharacterized protein	275.608	51.0988	5.39363	2.43126	5.95171e-10	1.3614e-08	up	291	303	237	49	33	101
KANK4	KN motif and ankyrin repeat domains 4	118.323	4.1764	28.3314	4.82433	6.41462e-10	1.46204e-08	up	85	112	159	7	4	3
HECTD2	Uncharacterized protein	332.723	1092.92	0.304436	-1.71579	6.42245e-10	1.46204e-08	down	324	394	287	1281	810	1747
DCBLD2	Uncharacterized protein	1510.06	474.498	3.18244	1.67014	6.42427e-10	1.46204e-08	up	1593	1571	1384	618	432	566
TRERF1	Transcriptional-regulating factor 1	685.038	188.302	3.63798	1.86314	6.55488e-10	1.48738e-08	up	702	619	737	249	147	259
CARD10	caspase recruitment domain family, member 10	121.715	9.17089	13.2719	3.7303	6.55776e-10	1.48738e-08	up	121	98	146	10	2	23
ST14	Uncharacterized protein	4998.95	571.703	8.74396	3.12829	6.77729e-10	1.53459e-08	up	3228	6878	5059	558	472	958
GCGR	Uncharacterized protein	79.1277	332.851	0.237727	-2.07262	6.85792e-10	1.55023e-08	down	60	74	104	416	322	386
ACTR3	Uncharacterized protein	3959.75	1312.93	3.01596	1.59262	6.94803e-10	1.56797e-08	up	3725	4910	3339	1762	971	1863
LOC101792573	Uncharacterized protein	182.395	2839.82	0.0642276	-3.96066	6.97955e-10	1.57244e-08	down	242	137	167	3448	3202	2687
MFSD10	Major facilitator superfamily domain-containing protein 10	300.391	61.2432	4.90488	2.29422	7.01054e-10	1.57678e-08	up	270	312	323	94	62	48
SLC25A42	Uncharacterized protein	217.26	726.312	0.299128	-1.74116	7.20265e-10	1.61729e-08	down	182	232	241	868	630	999
SGK1	Uncharacterized protein	826.076	2492.11	0.331476	-1.59302	7.41708e-10	1.66266e-08	down	866	789	829	3678	2188	2637
LOC101789482	myocyte-specific enhancer factor 2C-like	28.4323	175.862	0.161674	-2.62884	7.94343e-10	1.77528e-08	down	43	20	22	227	162	209
KCTD6	Uncharacterized protein	120.18	867.75	0.138496	-2.85208	7.94587e-10	1.77528e-08	down	125	108	128	1314	815	799
OARD1	Uncharacterized protein	212.435	722.591	0.293991	-1.76616	8.46227e-10	1.88752e-08	down	231	190	217	1044	603	838
LOC101792849	Integrin beta	28590	9808.72	2.91475	1.54337	8.55577e-10	1.9021e-08	up	26301	32028	27934	12056	7591	14575
LOC101801095	syntaxin-binding protein 6-like	532.833	143.224	3.72027	1.89541	8.55589e-10	1.9021e-08	up	417	664	531	233	119	139
PROX1	Uncharacterized protein	323.088	1039.13	0.310923	-1.68537	8.73271e-10	1.9382e-08	down	370	268	331	1561	775	1286
UBXN10	UBX domain protein 10	190.059	29.4317	6.45765	2.69101	9.50004e-10	2.10503e-08	up	155	185	232	38	22	43
ACOT9	acyl-CoA thioesterase 9	922.491	284.87	3.23829	1.69523	9.59176e-10	2.12186e-08	up	712	1116	961	314	279	370
TST	Sulfurtransferase	169.295	570.645	0.296673	-1.75305	9.84383e-10	2.17405e-08	down	121	189	201	635	497	832
SOX6	Uncharacterized protein	83.6676	317.659	0.263389	-1.92473	1.01714e-09	2.2427e-08	down	113	55	82	359	203	573
DCHS1	Uncharacterized protein	410.454	94.6533	4.33639	2.11649	1.04204e-09	2.29384e-08	up	384	365	484	156	81	86
LOC101792972	sterile alpha motif domain-containing protein 11-like	193.335	12.423	15.5627	3.96002	1.07362e-09	2.35951e-08	up	192	142	245	17	10	16
SYTL3	Uncharacterized protein	190.375	25.8601	7.36175	2.88005	1.07826e-09	2.36583e-08	up	159	292	128	29	26	32
CBS	Cystathionine beta-synthase	54.1937	1324.99	0.0409012	-4.61171	1.08133e-09	2.3687e-08	down	31	67	66	1026	1546	1796
PMEPA1	prostate transmembrane protein, androgen induced 1	300.166	63.342	4.73881	2.24452	1.08814e-09	2.37955e-08	up	321	277	304	84	57	75
GALNS	Uncharacterized protein	319.1	68.1218	4.68426	2.22782	1.08982e-09	2.37955e-08	up	332	383	249	97	54	85
TFPI	Uncharacterized protein	889.746	135.147	6.58356	2.71887	1.09425e-09	2.38535e-08	up	491	1229	980	154	100	221
CABLES2	Uncharacterized protein	225.687	37.2669	6.05595	2.59835	1.118e-09	2.43319e-08	up	201	288	194	65	16	55
CLN8	Uncharacterized protein	542.606	1698.17	0.319523	-1.64601	1.16418e-09	2.52961e-08	down	555	664	421	1824	1728	2155
ATF6	Uncharacterized protein	1848.7	597.939	3.09178	1.62844	1.20766e-09	2.61984e-08	up	1760	1815	1988	701	483	893
SDC1	Syndecan	6389.76	2261.03	2.82604	1.49878	1.21554e-09	2.62868e-08	up	5364	7001	6909	2642	2319	2612
ACTN1	Uncharacterized protein	40117.6	13599	2.95003	1.56073	1.21564e-09	2.62868e-08	up	34992	48234	38019	15043	8466	25232
MTHFD1	Uncharacterized protein	978.929	2910.56	0.336337	-1.57202	1.24853e-09	2.69545e-08	down	1026	1082	844	4176	2764	2880
PON2	Uncharacterized protein	30.1051	492.537	0.0611224	-4.03216	1.33591e-09	2.87948e-08	down	9	52	31	389	547	703
RAD18	Uncharacterized protein	337.276	72.123	4.67639	2.2254	1.35548e-09	2.917e-08	up	415	291	306	84	54	115
BOK	Bcl-2-related ovarian killer protein	581.862	16.8314	34.57	5.11145	1.38953e-09	2.97839e-08	up	401	871	497	17	13	29
RND2	Uncharacterized protein	87.2409	4.40731	19.7946	4.30704	1.39036e-09	2.97839e-08	up	91	95	77	8	2	6
LOC101795317	chromosome unknown open reading frame, human C20orf194	1057.25	342.721	3.08486	1.6252	1.39065e-09	2.97839e-08	up	1025	1191	974	403	449	240
YPEL1	yippee-like 1 (Drosophila)	543.5	1974.84	0.275211	-1.86139	1.46124e-09	3.12458e-08	down	733	375	517	2609	1366	2995
LOC101800035	Uncharacterized protein	9.3803	73.3164	0.127943	-2.96643	1.52648e-09	3.25892e-08	down	7	5	16	73	97	64
LOC101796830	Uncharacterized protein	50.3518	303.046	0.166152	-2.58942	1.55093e-09	3.30587e-08	down	57	59	36	389	331	281
SLCO1A2	Uncharacterized protein	0	28.8659	0	-20	1.58594e-09	3.37515e-08	down	0	0	0	18	38	37
LOC101802513	rho GTPase-activating protein 8-like	62.7975	1.4218	44.1677	5.46492	1.62539e-09	3.45079e-08	up	53	79	58	2	1	2
DPYSL3	Uncharacterized protein	1201.53	374.742	3.20629	1.68091	1.62662e-09	3.45079e-08	up	1134	1414	1081	590	294	412
BHMT	Uncharacterized protein	29.7948	3184.95	0.00935485	-6.74007	1.65971e-09	3.51544e-08	down	26	35	29	3560	4250	2307
LOC101791883	COUP transcription factor 1-like	55.1376	255.297	0.215975	-2.21107	1.67734e-09	3.54721e-08	down	39	54	73	272	253	337
PLCXD1	Phosphatidylinositol-specific phospholipase C X domain-containing protein 1	25.4989	183.339	0.139081	-2.846	1.68114e-09	3.54966e-08	down	31	13	32	151	210	245
BICC1	Uncharacterized protein	4434.92	1536.52	2.88633	1.52924	1.70685e-09	3.5983e-08	up	3868	5009	4508	2421	1352	1457
RAPH1	Uncharacterized protein	2880.23	937.352	3.07273	1.61952	1.76998e-09	3.72554e-08	up	3140	3032	2504	1195	572	1588
SHROOM2	Uncharacterized protein	5156.65	1832.02	2.81473	1.493	1.84423e-09	3.87577e-08	up	5176	6058	4338	2279	1841	2028
TNK2	Uncharacterized protein	115.088	12.9392	8.89456	3.15292	1.85911e-09	3.90093e-08	up	105	142	101	12	9	25
LOC101798650	cytosolic purine 5'-nucleotidase-like	203.355	708.54	0.287006	-1.80085	1.89533e-09	3.97074e-08	down	177	199	236	739	794	808
HMGN3	Uncharacterized protein	1804.45	597.701	3.01898	1.59406	1.9169e-09	4.00969e-08	up	2033	1934	1470	760	558	711
LOC101790086	uncharacterized LOC101790086	218.645	17.9499	12.1809	3.60655	1.98394e-09	4.14348e-08	up	283	207	167	28	16	17
SLC17A9	Uncharacterized protein	44.3222	3.35957	13.1928	3.72168	2.05959e-09	4.29481e-08	up	28	88	20	1	6	3
LOC101791665	cytochrome b5-like	1162.5	4212.08	0.275992	-1.8573	2.07986e-09	4.33037e-08	down	1260	1034	1197	4661	4674	4589
LOC101792779	uncharacterized LOC101792779	1.33229	189.768	0.0070206	-7.15419	2.09394e-09	4.35293e-08	down	0	1	3	179	117	387
RBP4	Uncharacterized protein	36.1436	202.446	0.178535	-2.48572	2.10056e-09	4.35995e-08	down	42	23	43	166	206	312
GCNT7	Uncharacterized protein	340.205	77.1145	4.41169	2.14133	2.13696e-09	4.42867e-08	up	338	358	329	111	63	92
FRZB	Uncharacterized protein	454.183	115.201	3.94251	1.97911	2.25573e-09	4.66763e-08	up	515	373	474	164	109	116
BACE2	Uncharacterized protein	133.791	13.0079	10.2854	3.36253	2.2847e-09	4.7203e-08	up	153	159	92	30	9	6
EPB41L2	Band 4.1-like protein 2	1830.86	615.791	2.97318	1.57201	2.30413e-09	4.75316e-08	up	1940	1604	1953	806	592	681
HRG	Uncharacterized protein	2.71887	71.4261	0.0380655	-4.71537	2.31274e-09	4.76361e-08	down	7	0	1	111	51	88
AFF2	AF4/FMR2 family, member 2	545.309	137.432	3.96784	1.98835	2.33599e-09	4.79647e-08	up	654	500	484	215	133	113
LOC101800008	neural cell adhesion molecule L1-like protein-like	213.1	996.926	0.213757	-2.22595	2.33714e-09	4.79647e-08	down	295	40	296	1075	1039	1222
LOC101798333	coagulation factor XIII B chain-like	0	36.4544	0	-20	2.3394e-09	4.79647e-08	down	0	0	0	31	46	41
CMIP	c-Maf inducing protein	486.047	135.894	3.57667	1.83862	2.35461e-09	4.82032e-08	up	458	519	488	156	126	181
LOC101800310	Uncharacterized protein	116.303	12.957	8.97608	3.16609	2.40066e-09	4.90713e-08	up	88	112	150	13	16	13
ARRDC4	Uncharacterized protein	107.893	426.655	0.25288	-1.98347	2.46331e-09	5.02754e-08	down	114	78	131	530	320	644
NREP	neuronal regeneration related protein	421.397	1461.49	0.288333	-1.79419	2.47945e-09	5.05281e-08	down	444	295	522	1481	1326	2203
ARHGEF26	SH3 domain-containing guanine exchange factor	522.992	1542.49	0.339056	-1.5604	2.49291e-09	5.07257e-08	down	449	670	464	1780	1302	2246
GLS	Uncharacterized protein	4022.04	926.493	4.34115	2.11808	2.57178e-09	5.22113e-08	up	3451	5381	3355	1206	741	1267
ACSS2	Acetyl-coenzyme A synthetase	138.127	458.138	0.301496	-1.72979	2.57369e-09	5.22113e-08	down	129	124	162	525	388	669
OTUD3	OTU domain containing 3	282.474	65.8491	4.28971	2.10088	2.59646e-09	5.25939e-08	up	273	225	349	79	63	81
LOC101800066	thyroid hormone-inducible hepatic protein-like	0.337881	120.306	0.00280852	-8.47598	2.6612e-09	5.38243e-08	down	0	0	1	141	97	180
MAN1A1	alpha-1,2-Mannosidase	711.647	2118.53	0.335916	-1.57383	2.72241e-09	5.49795e-08	down	626	913	615	2549	2144	2414
LOC101790726	Pyruvate kinase	3807.36	818.248	4.65306	2.21818	2.74055e-09	5.52629e-08	up	4837	3197	3384	1253	555	1074
LOC101797777	putative short-chain dehydrogenase/reductase family 42E member 2-like	170.347	26.1448	6.51552	2.70388	2.80784e-09	5.65351e-08	up	161	139	211	27	30	29
PTAFR	Uncharacterized protein	90.5579	6.78908	13.3388	3.73755	2.89131e-09	5.81288e-08	up	94	81	97	10	8	4
TAGLN2	Uncharacterized protein	683.548	206.859	3.30441	1.72439	2.89914e-09	5.81609e-08	up	577	875	617	251	160	311
PM20D1	Uncharacterized protein	535.49	1566.16	0.341913	-1.5483	2.90156e-09	5.81609e-08	down	525	521	565	1844	1191	2447
FBLN1	Uncharacterized protein	132.778	898.52	0.147774	-2.75854	2.91101e-09	5.82574e-08	down	119	155	127	809	1024	1135
MGST1	Microsomal glutathione S-transferase 1	425.648	2288.5	0.185994	-2.42667	2.91578e-09	5.82574e-08	down	398	455	430	3006	2740	1671
ANLN	Uncharacterized protein	1577.08	211.043	7.47276	2.90164	2.91936e-09	5.82574e-08	up	1637	2027	1108	329	129	293
DCAF5	Uncharacterized protein	1145.68	371.952	3.08018	1.62302	2.9252e-09	5.82873e-08	up	1256	1293	907	442	242	641
ACADS	Uncharacterized protein	180.378	607.317	0.297008	-1.75143	3.00682e-09	5.98251e-08	down	169	163	210	632	526	937
LOC101796956	melanotransferrin-like	110.098	17.8971	6.15172	2.62099	3.0241e-09	6.008e-08	up	97	137	99	23	11	30
DNM1	Uncharacterized protein	96.9358	6.64624	14.5851	3.86642	3.05637e-09	6.0611e-08	up	101	84	106	14	3	7
FGB	Fibrinogen beta chain	1044.57	16471.3	0.0634176	-3.97897	3.05984e-09	6.0611e-08	down	1593	90	1403	18001	19780	15826
AACS	Uncharacterized protein	293.204	3538.41	0.0828633	-3.59312	3.06498e-09	6.06236e-08	down	327	341	217	4177	4244	3076
GPAM	Glyceraldehyde-3-phosphate acyltransferase	630.513	8922.35	0.0706668	-3.82282	3.516e-09	6.94423e-08	down	684	641	573	9491	11675	7342
PRICKLE2	Uncharacterized protein	273.282	58.9342	4.63707	2.21321	3.53626e-09	6.974e-08	up	228	276	319	82	70	39
C8A	Uncharacterized protein	50.2917	982.072	0.0512098	-4.28744	3.61227e-09	7.11347e-08	down	23	23	104	658	1226	1315
ITPK1	Uncharacterized protein	4847.74	1689.67	2.86904	1.52057	3.73484e-09	7.3441e-08	up	4370	5072	5165	2076	1245	2610
C9	Uncharacterized protein	62.3728	802.866	0.0776876	-3.68617	3.77818e-09	7.41847e-08	down	29	28	129	1201	812	664
ROBO1	roundabout, axon guidance receptor, homolog 1 (Drosophila)	2442.07	243.883	10.0133	3.32385	3.87662e-09	7.60066e-08	up	2631	3144	1614	298	313	169
LTBP2	Uncharacterized protein	4180.92	136.627	30.601	4.93551	3.91636e-09	7.6674e-08	up	5363	2686	4442	125	149	181
RIMBP2	Uncharacterized protein	776.633	3398.2	0.228542	-2.12947	4.10323e-09	8.02158e-08	down	536	879	930	3129	2991	5604
TMEM2	Uncharacterized protein	2345.06	789.278	2.97115	1.57102	4.27698e-09	8.34911e-08	up	1924	2360	2778	953	539	1304
LOC101798663	Uncharacterized protein	27.3157	753.707	0.0362419	-4.7862	4.32793e-09	8.43633e-08	down	40	25	17	458	653	1512
KLHL5	kelch-like family member 5	507.812	141.862	3.57963	1.83981	4.37143e-09	8.50879e-08	up	558	541	431	190	134	156
LOC101800257	Uncharacterized protein	1.35378	36.4351	0.037156	-4.75026	4.40833e-09	8.56821e-08	down	1	0	3	42	41	37
PAN3	Uncharacterized protein	1252.87	403.791	3.10277	1.63356	4.42781e-09	8.59365e-08	up	1125	1414	1242	564	302	544
L2HGDH	Uncharacterized protein	93.9521	355.362	0.264385	-1.91929	4.46249e-09	8.6485e-08	down	79	96	108	491	261	492
SLC9A8	Sodium/hydrogen exchanger	248.843	793.053	0.313779	-1.67218	4.54295e-09	8.79175e-08	down	317	222	208	1064	718	919
ACSL3	Uncharacterized protein	1285.6	3651.08	0.352115	-1.50588	4.5655e-09	8.82269e-08	down	1007	1736	1154	4306	3155	5102
LOC101800919	uncharacterized LOC101800919	14.6698	121.94	0.120304	-3.05525	4.91424e-09	9.48299e-08	down	15	12	17	151	102	168
CDK6	Cell division protein kinase 6	417.718	104.431	3.99995	1.99998	4.98716e-09	9.60993e-08	up	391	480	390	146	60	169
TRIM35	Uncharacterized protein	489.164	51.8777	9.42918	3.23713	5.06248e-09	9.7411e-08	up	418	686	380	77	56	38
LOC101790722	Uncharacterized protein	52.9618	677.104	0.0782181	-3.67635	5.08688e-09	9.77408e-08	down	51	28	79	680	876	616
RSPO3	Uncharacterized protein	565.136	14.2011	39.7953	5.31453	5.09896e-09	9.78331e-08	up	395	844	479	15	21	8
ABCC2	Uncharacterized protein	4295.24	19832.1	0.21658	-2.20703	5.13434e-09	9.83717e-08	down	2170	7785	3186	19732	16482	32660
DST	Uncharacterized protein	5429.78	14709.2	0.369141	-1.43776	5.31628e-09	1.01713e-07	down	5716	6150	4516	18498	11770	20801
SLC16A10	Uncharacterized protein	76.8113	685.959	0.111976	-3.15873	5.42099e-09	1.03569e-07	down	56	71	104	759	659	908
CWH43	cell wall biogenesis 43 C-terminal homolog (S. cerevisiae)	89.6516	5.86469	15.2867	3.9342	5.61097e-09	1.07046e-07	up	76	126	70	10	5	5
ISOC1	Uncharacterized protein	85.1492	537.311	0.158473	-2.65769	5.64783e-09	1.07597e-07	down	54	94	109	394	443	1041
LOC101802025	uncharacterized LOC101802025	13.8893	170.29	0.0815623	-3.61595	5.97455e-09	1.1366e-07	down	16	0	25	274	89	251
SMPDL3A	Uncharacterized protein	1935.8	679.261	2.84987	1.5109	6.22881e-09	1.1833e-07	up	1690	2056	2089	740	672	881
HDAC4	Uncharacterized protein	129.478	683.509	0.189432	-2.40025	6.24196e-09	1.18412e-07	down	142	136	112	709	466	1255
FN1	Uncharacterized protein	521054	64166.1	8.1204	3.02155	6.26752e-09	1.1873e-07	up	543803	383055	633437	61492	37979	132307
FAM84B	Uncharacterized protein	1818.75	254.143	7.15641	2.83924	6.30693e-09	1.19308e-07	up	1287	2350	1871	253	207	425
WNT16	Protein Wnt	75.3144	0.266499	282.606	8.14265	6.42194e-09	1.21195e-07	up	89	100	39	1	0	0
ST3GAL1	Uncharacterized protein	322.215	54.6315	5.89797	2.56022	6.42467e-09	1.21195e-07	up	340	222	402	86	48	52
AP1S3	Uncharacterized protein	243.637	13.5432	17.9896	4.1691	6.46428e-09	1.21771e-07	up	319	124	283	16	18	9
LOC101795404	uncharacterized LOC101795404	42.0854	0	Inf	20	6.73972e-09	1.26782e-07	up	30	64	34	0	0	0
LOC101793523	uncharacterized LOC101793523	113.055	11.392	9.92403	3.31093	6.78947e-09	1.2754e-07	up	107	125	109	17	8	15
LOC101789528	Uncharacterized protein	30.2933	183.401	0.165175	-2.59793	7.02495e-09	1.31779e-07	down	29	27	35	211	168	247
FMNL2	Uncharacterized protein	531.551	151.207	3.51539	1.81368	7.09557e-09	1.32918e-07	up	572	503	523	224	122	176
LOC101793884	uncharacterized LOC101793884	885.09	3448.55	0.256656	-1.96209	7.28059e-09	1.3607e-07	down	979	1423	292	4224	2567	5300
ATP8B3	Phospholipid-translocating ATPase	78.0928	4.0526	19.2698	4.26827	7.28403e-09	1.3607e-07	up	58	110	69	2	2	11
LOC101790520	Sulfotransferase	2.03407	154.619	0.0131554	-6.2482	7.44093e-09	1.38808e-07	down	3	0	3	115	226	143
STAT1	Uncharacterized protein	205.414	666.346	0.30827	-1.69773	7.57546e-09	1.41122e-07	down	230	186	201	816	703	699
LOC101803228	Uncharacterized protein	16.7198	125.906	0.132795	-2.91272	7.67141e-09	1.42712e-07	down	8	10	32	134	104	199
ELP6	Uncharacterized protein	61.2484	263.807	0.232171	-2.10674	7.89362e-09	1.46642e-07	down	47	71	67	299	215	402
FGD5	Uncharacterized protein	2300.02	794.528	2.89482	1.53348	7.9982e-09	1.4838e-07	up	2238	2420	2272	1182	635	929
SESN1	Uncharacterized protein	545.48	1653.35	0.329923	-1.5998	8.12133e-09	1.50457e-07	down	558	392	683	1585	1530	2542
CHP1	Uncharacterized protein	2427.98	889.015	2.73108	1.44947	8.19713e-09	1.51653e-07	up	2445	2555	2315	1280	890	803
HSPD1	Uncharacterized protein	1786.19	4761.24	0.375153	-1.41445	8.30739e-09	1.53481e-07	down	1721	2144	1532	5678	3347	7792
LOC101792904	voltage-dependent L-type calcium channel subunit alpha-1C-like	305.161	67.3203	4.53297	2.18046	8.33925e-09	1.53859e-07	up	302	261	353	108	47	81
LOC101790070	Uncharacterized protein	106.766	593.136	0.180003	-2.47391	8.48836e-09	1.56395e-07	down	80	115	127	626	686	635
SEPSECS	Uncharacterized protein	534.91	1534.31	0.348633	-1.52022	8.57279e-09	1.57735e-07	down	522	463	621	1872	1387	1981
VCL	Uncharacterized protein	8317.07	2978.61	2.79227	1.48144	8.69984e-09	1.59854e-07	up	7069	11046	7082	3532	1898	5204
XIAP	Uncharacterized protein	317.162	953.609	0.332591	-1.58818	8.81465e-09	1.61742e-07	down	257	352	348	1032	885	1336
LOC101802463	uncharacterized LOC101802463	93.4207	6.25516	14.935	3.90062	9.33415e-09	1.71041e-07	up	87	107	88	14	2	7
CCDC171	coiled-coil domain containing 171	256.238	52.3734	4.89253	2.29058	9.63974e-09	1.76401e-07	up	231	249	291	87	25	78
MCAM	melanoma cell adhesion molecule	1178.83	371.281	3.17504	1.66677	9.72387e-09	1.77699e-07	up	1322	1176	1049	543	209	582
DSC2	Uncharacterized protein	54.4082	0.90644	60.024	5.90747	9.80401e-09	1.7887e-07	up	53	76	36	1	1	1
C8B	Uncharacterized protein	16.2239	334.854	0.0484507	-4.36734	9.8146e-09	1.7887e-07	down	11	1	36	342	403	346
EIF5	Uncharacterized protein	2669.1	7209.26	0.370232	-1.4335	1.0718e-08	1.9507e-07	down	2433	3087	2539	8829	6286	9636
ST3GAL6	Type 2 lactosamine alpha-2,3-sialyltransferase	909.449	300.736	3.02408	1.59649	1.09658e-08	1.9931e-07	up	864	1039	842	377	318	305
SLC25A1	Uncharacterized protein	249.185	772.603	0.322527	-1.63251	1.12113e-08	2.03498e-07	down	245	266	240	993	751	861
PCDH18	Protocadherin-18	26.6531	139.624	0.190892	-2.38917	1.14204e-08	2.07014e-07	down	24	40	17	172	124	182
RABL5	RAB, member RAS oncogene family-like 5	368.688	104.308	3.5346	1.82155	1.17808e-08	2.1326e-07	up	350	442	322	141	114	89
LOC101802900	Uncharacterized protein	108.384	0.248858	435.526	8.76662	1.19389e-08	2.15829e-07	up	68	170	92	0	0	1
LOC101797303	Clathrin heavy chain	3023.38	1118.9	2.70209	1.43408	1.19672e-08	2.15829e-07	up	3019	3533	2577	1480	1115	1159
LOC101799215	Kinesin-like protein	55.1851	231.031	0.238864	-2.06574	1.19709e-08	2.15829e-07	down	60	54	52	289	264	204
ACE	Uncharacterized protein	1.33229	126.027	0.0105714	-6.56369	1.22109e-08	2.19861e-07	down	0	1	3	153	64	242
RPS27L	ribosomal protein S27-like	119.384	412.246	0.289594	-1.78789	1.23734e-08	2.22489e-07	down	117	166	79	493	379	533
TSPAN2	Tetraspanin	169.256	31.9382	5.29948	2.40585	1.26411e-08	2.27e-07	up	167	214	131	37	24	51
LOC101794294	Uncharacterized protein	915.327	307.646	2.97526	1.57302	1.30935e-08	2.3481e-07	up	728	1139	902	404	239	428
SCPEP1	Uncharacterized protein	864.78	2410.97	0.358686	-1.47921	1.31635e-08	2.3575e-07	down	786	928	893	3129	2165	2935
FAM195A	family with sequence similarity 195, member A	21.2294	123.557	0.171819	-2.54104	1.33978e-08	2.39629e-07	down	21	23	20	156	104	166
HLCS	Uncharacterized protein	335.254	1007.55	0.332742	-1.58752	1.35494e-08	2.42017e-07	down	357	319	332	1264	1120	935
LOC101797123	uncharacterized LOC101797123	45.0369	0.248858	180.975	7.49964	1.35927e-08	2.42469e-07	up	33	69	35	0	0	1
ARAP3	Uncharacterized protein	102.213	10.0238	10.1971	3.35008	1.4131e-08	2.51737e-07	up	112	92	103	14	11	8
ESR2	Estrogen receptor beta	2.33121	47.8779	0.0486908	-4.36021	1.43879e-08	2.55976e-07	down	2	2	3	76	35	56
LOC101800948	Uncharacterized protein	367.62	52.359	7.02115	2.81171	1.46709e-08	2.60665e-07	up	240	467	406	66	52	58
BASP1	23 kDa cortical cytoskeleton-associated protein	3016.27	1094.34	2.75625	1.46271	1.47291e-08	2.61087e-07	up	2782	3295	3019	1589	948	1206
RCBTB2	Uncharacterized protein	281.728	846.616	0.332769	-1.58741	1.47335e-08	2.61087e-07	down	304	285	259	1027	737	1144
SNX7	Uncharacterized protein	627.517	1784.24	0.3517	-1.50758	1.48738e-08	2.63227e-07	down	750	664	476	2120	1775	2110
CECR5	cat eye syndrome chromosome region, candidate 5	310.352	911.93	0.340324	-1.55502	1.50602e-08	2.66176e-07	down	292	271	369	1110	731	1327
SLC25A48	Uncharacterized protein	1.69393	108.09	0.0156715	-5.99572	1.53088e-08	2.70214e-07	down	2	0	3	174	112	72
EIF4E3	Uncharacterized protein	331.933	75.3226	4.40682	2.13974	1.60818e-08	2.83487e-07	up	244	373	385	84	52	131
FRMPD4	Uncharacterized protein	1.63395	59.6633	0.0273862	-5.1904	1.63762e-08	2.88298e-07	down	1	3	1	75	41	95
SLC34A1	Uncharacterized protein	43.2414	276.808	0.156215	-2.6784	1.67452e-08	2.94409e-07	down	43	23	63	373	166	452
PLA2G15	Uncharacterized protein	552.824	1626.1	0.339969	-1.55652	1.71668e-08	3.01428e-07	down	614	614	439	1912	1716	1790
DSTN	Uncharacterized protein	11186.5	4196.7	2.66554	1.41443	1.72098e-08	3.01789e-07	up	10761	12089	10874	5272	3421	5842
CXCL12	Uncharacterized protein	980.666	74.1098	13.2326	3.72603	1.73432e-08	3.03733e-07	up	708	1411	859	116	64	73
PHYH	Uncharacterized protein	253.091	781.732	0.323757	-1.62702	1.75248e-08	3.06512e-07	down	274	242	245	1037	654	1003
HIPK3	Uncharacterized protein	397.387	1154.15	0.34431	-1.53822	1.85076e-08	3.23283e-07	down	387	465	348	1312	1032	1611
CNKSR3	Uncharacterized protein	516.642	166.852	3.09641	1.63059	1.88525e-08	3.28879e-07	up	479	705	382	206	145	222
WLS	Integral membrane protein GPR177	12175.4	1563.96	7.78502	2.9607	1.89424e-08	3.30019e-07	up	14931	9102	12420	2051	1806	1250
PYGL	Alpha-1,4 glucan phosphorylase	417.067	1198.36	0.348032	-1.52271	1.92556e-08	3.35043e-07	down	289	537	437	1337	1030	1765
LOC101791447	Transcription factor MafB	329.315	38.277	8.60345	3.10492	2.20697e-08	3.83511e-07	up	422	249	315	90	27	15
FGFRL1	Uncharacterized protein	87.1377	316.463	0.275349	-1.86067	2.59385e-08	4.49462e-07	down	89	65	107	404	280	399
CDA	Uncharacterized protein	31.5301	170.341	0.1851	-2.43362	2.59428e-08	4.49462e-07	down	16	49	31	176	182	210
KLHL8	Uncharacterized protein	108.621	394.24	0.275521	-1.85977	2.59652e-08	4.49462e-07	down	106	127	95	482	371	485
LOC101800053	chromosome unknown open reading frame, human C1orf131	60.0865	222.123	0.270509	-1.88625	2.63173e-08	4.54971e-07	down	58	80	44	300	235	202
LOC101801832	Lecithin cholesterol acyltransferase	76.587	1203.73	0.0636248	-3.97427	2.64481e-08	4.56509e-07	down	60	48	121	1649	1386	893
LOC101800252	Uncharacterized protein	238.987	5.24349	45.5779	5.51026	2.64742e-08	4.56509e-07	up	164	207	347	3	5	10
TSPAN5	Tetraspanin	550.825	1471	0.374456	-1.41713	2.65891e-08	4.57905e-07	down	590	557	511	1740	1114	2297
LOC101803324	potassium voltage-gated channel subfamily H member 2-like	69.7311	3.14537	22.1694	4.4705	2.74432e-08	4.72009e-07	up	58	88	65	7	2	2
AFF1	Uncharacterized protein	431.049	1233.4	0.349481	-1.51671	2.774e-08	4.76505e-07	down	459	480	361	1590	1084	1550
LOC101801218	band 4.1-like protein 4B-like	81.4565	297.089	0.274182	-1.86679	2.87419e-08	4.93086e-07	down	79	43	121	394	257	368
LOC101803119	rho-related GTP-binding protein RhoU-like	322.234	960.502	0.335485	-1.57568	2.9443e-08	5.04469e-07	down	202	398	375	1084	1025	1088
MATN2	matrilin 2	221.232	8.47676	26.0987	4.7059	3.04001e-08	5.20205e-07	up	132	248	288	17	5	8
LOC101790536	uncharacterized LOC101790536	266.95	58.4893	4.56408	2.19032	3.07876e-08	5.26166e-07	up	164	422	227	81	39	87
GPR1	Uncharacterized protein	59.2087	252.37	0.23461	-2.09166	3.12982e-08	5.34215e-07	down	50	72	57	340	154	408
PKDCC	Uncharacterized protein	280.147	63.2867	4.42663	2.14621	3.15934e-08	5.38569e-07	up	318	281	244	97	48	75
LOC101802925	uncharacterized LOC101802925	381.474	91.6389	4.1628	2.05755	3.17333e-08	5.4027e-07	up	426	401	322	94	36	211
HECW2	Uncharacterized protein	2025.2	186.874	10.8373	3.43793	3.2299e-08	5.49206e-07	up	2460	2312	1337	285	108	276
LOC101801998	uncharacterized LOC101801998	118.429	11.8548	9.99003	3.32049	3.39215e-08	5.76066e-07	up	75	158	126	13	10	18
FADS1	Uncharacterized protein	307.955	2608.34	0.118065	-3.08234	3.40683e-08	5.77659e-07	down	282	412	239	2596	4380	818
LOC101796349	receptor-type tyrosine-protein phosphatase F-like	1277.16	435.44	2.93303	1.55239	3.41012e-08	5.77659e-07	up	1237	1236	1369	500	305	735
EXOC3L4	SEC6-like protein C14orf73	18.9224	184.682	0.102459	-3.28687	3.42573e-08	5.79574e-07	down	26	3	27	334	146	155
DUSP7	Uncharacterized protein	249.793	66.2055	3.77299	1.91571	3.53227e-08	5.96848e-07	up	228	250	274	73	68	81
MTHFS	5-formyltetrahydrofolate cyclo-ligase	11.6244	73.4191	0.158329	-2.659	3.55043e-08	5.99163e-07	down	13	12	10	97	65	89
CHGA	Uncharacterized protein	536.376	155.716	3.44457	1.78433	3.56436e-08	6.00761e-07	up	455	537	623	135	128	280
RHOB	ras homolog family member B	152.988	491.134	0.311501	-1.68269	3.67966e-08	6.19417e-07	down	173	147	140	495	405	807
GLCCI1	Uncharacterized protein	132.396	443.593	0.298463	-1.74438	3.68989e-08	6.20363e-07	down	112	174	115	561	416	528
AQP9	Uncharacterized protein	87.1104	1281.73	0.067963	-3.87911	3.84803e-08	6.46143e-07	down	54	115	95	1522	1665	904
FAM150B	family with sequence similarity 150, member B	518.601	19.4624	26.6463	4.73587	3.86875e-08	6.48811e-07	up	529	732	312	17	21	27
DLAT	Acetyltransferase component of pyruvate dehydrogenase complex	823.599	3007.67	0.273833	-1.86863	3.90961e-08	6.54848e-07	down	823	860	798	3836	3279	2825
SEPN1	Uncharacterized protein	2379.83	870.081	2.73518	1.45163	4.0139e-08	6.7148e-07	up	2474	2216	2463	1136	668	1230
PRKCD	Protein kinase C delta type	487.164	141.45	3.44407	1.78411	4.0328e-08	6.73804e-07	up	534	505	428	203	84	219
WNT8B	Protein Wnt	24.443	149.238	0.163785	-2.61012	4.04718e-08	6.75366e-07	down	16	31	27	191	114	216
MYO1B	Myosin-Ib	592.261	1567.64	0.377803	-1.40429	4.13098e-08	6.88496e-07	down	563	490	724	1797	1377	2211
LOC101798971	Uncharacterized protein	1.29607	257.038	0.00504234	-7.63169	4.25305e-08	7.07965e-07	down	1	3	0	155	320	364
NCOA4	nuclear receptor coactivator 4	2992.63	16473.7	0.181661	-2.46068	4.2881e-08	7.12916e-07	down	3007	2302	3659	14094	14495	28325
DLC1	Uncharacterized protein	314.784	984.879	0.319617	-1.64559	4.30588e-08	7.14988e-07	down	220	401	332	1122	735	1601
LOC101799918	zona pellucida sperm-binding protein 4-like	63.8037	2.91525	21.8861	4.45195	4.37262e-08	7.25176e-07	up	46	61	85	0	3	7
LOC101795022	Uncharacterized protein	285.758	897.833	0.318275	-1.65165	4.38651e-08	7.26583e-07	down	315	270	274	1022	984	967
LOC101790824	dynein light chain 1, cytoplasmic-like	318.224	88.6718	3.58879	1.8435	4.39902e-08	7.27144e-07	up	326	340	293	93	101	98
PIK3AP1	Uncharacterized protein	922.627	332.974	2.77087	1.47034	4.40071e-08	7.27144e-07	up	858	968	954	429	330	360
MYO1H	Uncharacterized protein	310.954	78.6628	3.953	1.98295	4.41381e-08	7.28415e-07	up	279	326	332	96	53	130
LOC101798867	uncharacterized LOC101798867	896.996	307.344	2.91854	1.54525	4.43093e-08	7.30342e-07	up	903	883	913	405	263	388
HEBP1	Uncharacterized protein	1093.95	5234.2	0.209	-2.25843	4.46296e-08	7.34723e-07	down	1027	1356	925	4973	6088	6140
RAB9A	Ras-related protein Rab-9A	264.94	779.219	0.340007	-1.55636	4.47993e-08	7.36614e-07	down	227	288	284	967	743	928
HID1	Uncharacterized protein	229.988	46.7419	4.92039	2.29877	4.51977e-08	7.42258e-07	up	271	178	240	64	39	58
LOC101796596	Uncharacterized protein	31.5872	725.714	0.0435257	-4.52199	4.56538e-08	7.48834e-07	down	12	28	55	977	768	663
RASSF9	Uncharacterized protein	321.91	82.4138	3.90602	1.9657	4.59737e-08	7.53163e-07	up	356	310	302	95	62	132
AGPAT3	1-acyl-sn-glycerol-3-phosphate acyltransferase gamma	77.8697	3500.09	0.0222479	-5.49019	4.63404e-08	7.58247e-07	down	71	88	76	3971	5043	1887
MAFK	Uncharacterized protein	425.302	128.997	3.29699	1.72115	4.70056e-08	7.68196e-07	up	408	562	318	146	84	230
HORMAD2	Uncharacterized protein	230.803	49.4639	4.66608	2.22221	4.82179e-08	7.87051e-07	up	187	319	194	47	41	84
SLCO4A1	Uncharacterized protein	87.9879	7.44776	11.814	3.56243	4.84559e-08	7.89977e-07	up	97	92	76	3	10	11
LOC101793676	Uncharacterized protein	59.2283	1.95479	30.299	4.9212	4.9242e-08	8.01822e-07	up	72	56	50	4	1	2
TNIP1	Uncharacterized protein	553.941	174.069	3.18232	1.67008	4.98424e-08	8.10617e-07	up	423	674	578	208	129	274
GPR56	Uncharacterized protein	791.808	188.246	4.20623	2.07253	4.99082e-08	8.10708e-07	up	862	954	576	262	145	248
UHRF1BP1L	UHRF1 binding protein 1-like	1021.96	361.452	2.82737	1.49946	5.03402e-08	8.16738e-07	up	1013	1092	975	544	271	444
TRIM2	Uncharacterized protein	29.3781	155.393	0.189057	-2.40311	5.12011e-08	8.29704e-07	down	30	22	36	165	157	201
PRMT7	Protein arginine N-methyltransferase 7	311.66	92.4345	3.37168	1.75347	5.24617e-08	8.49109e-07	up	255	427	263	133	84	97
LOC101803251	Uncharacterized protein	2882.43	1082.38	2.66306	1.41308	5.28011e-08	8.53576e-07	up	2595	3064	3029	1409	832	1533
CHST11	Uncharacterized protein	530.026	61.1211	8.67174	3.11632	5.40788e-08	8.73181e-07	up	365	716	526	79	77	40
SCCPDH	Putative saccharopine dehydrogenase	271.294	1023.45	0.265079	-1.91551	5.45974e-08	8.80498e-07	down	306	248	261	1101	1231	999
TMEM135	Uncharacterized protein	246.14	729.377	0.337466	-1.56719	5.52548e-08	8.90032e-07	down	221	281	241	846	824	730
FAM60A	Uncharacterized protein	189.914	48.8396	3.88853	1.95922	5.53581e-08	8.90629e-07	up	170	247	158	60	21	99
KLHL14	kelch-like family member 14	64.0299	5.47423	11.6966	3.54802	5.66695e-08	9.10639e-07	up	61	51	80	6	8	3
TPMT	Uncharacterized protein	132.289	411.578	0.321419	-1.63747	5.79439e-08	9.30007e-07	down	113	127	158	433	345	648
TMEM14C	transmembrane protein 14C	246.824	1061.12	0.232608	-2.10403	5.8079e-08	9.31064e-07	down	231	352	166	1465	1099	968
LOC101795205	HERV-FRD_6p24.1 provirus ancestral Env polyprotein-like	586.275	1745.85	0.335811	-1.57428	5.91045e-08	9.46376e-07	down	736	681	352	2139	1270	2729
CTHRC1	Uncharacterized protein	1498.91	17.7889	84.2608	6.39679	5.97126e-08	9.54976e-07	up	1025	1241	2234	35	14	12
RAB32	Uncharacterized protein	241.213	60.1062	4.01312	2.00472	6.08443e-08	9.71919e-07	up	228	292	209	90	65	43
ELP2	elongator acetyltransferase complex subunit 2	329.99	99.7407	3.30847	1.72617	6.09473e-08	9.7241e-07	up	354	364	277	132	97	107
LOC101798817	acyl-CoA synthetase short-chain family member 3, mitochondrial-like	46.8992	175.383	0.26741	-1.90288	6.11387e-08	9.74308e-07	down	51	27	62	216	160	222
RNF123	Uncharacterized protein	481.251	1267.94	0.379555	-1.39762	6.20925e-08	9.88336e-07	down	451	504	495	1438	994	1993
ALDH18A1	Uncharacterized protein	2283.9	820.983	2.78191	1.47607	6.22782e-08	9.9012e-07	up	1885	2514	2491	1059	915	727
ENO1	Alpha-enolase	11072.7	29261.8	0.3784	-1.40201	6.43715e-08	1.02219e-06	down	10351	11474	11530	32797	31913	32311
KLF3	Basic kruppel-like factor 3-like protein	680.43	232.757	2.92334	1.54762	6.54051e-08	1.03738e-06	up	705	613	726	268	228	290
LOC101792054	cadherin-13-like	422.76	1402.99	0.301328	-1.73059	6.80584e-08	1.07819e-06	down	463	402	406	2145	1114	1590
FAM92A1	family with sequence similarity 92, member A1	139.301	20.9174	6.65956	2.73543	6.891e-08	1.0904e-06	up	126	168	127	35	15	23
LOC101805184	uncharacterized LOC101805184	291.365	7.39405	39.4053	5.30032	6.91916e-08	1.09357e-06	up	344	140	384	6	11	6
IRS2	insulin receptor substrate 2	16.2536	87.0193	0.186781	-2.42058	7.10577e-08	1.12174e-06	down	6	34	10	90	109	82
LOC101795888	pyroglutamyl-peptidase 1-like	248.85	57.3718	4.3375	2.11686	7.13931e-08	1.12572e-06	up	269	216	262	64	42	96
DAAM1	Uncharacterized protein	170.151	516.221	0.329608	-1.60117	7.3412e-08	1.15604e-06	down	181	134	195	710	343	775
LIPG	Uncharacterized protein	296.705	88.3666	3.35765	1.74745	7.34937e-08	1.15604e-06	up	342	354	200	112	79	111
IGDCC4	immunoglobulin superfamily, DCC subclass, member 4	8.24446	101.206	0.0814619	-3.61773	7.3574e-08	1.15604e-06	down	4	11	10	76	123	132
LOC101800452	Uncharacterized protein	5.61158	79.6014	0.070496	-3.82632	7.52269e-08	1.18063e-06	down	1	7	9	125	70	76
TACC3	Uncharacterized protein	819.454	287.706	2.84824	1.51007	7.5579e-08	1.18478e-06	up	885	872	712	378	277	316
DDX58	Retinoic acid-inducible protein I	744.218	242.682	3.06664	1.61666	7.61621e-08	1.19253e-06	up	695	598	939	359	227	234
KLF7	Uncharacterized protein	108.647	17.8447	6.08848	2.60608	8.09899e-08	1.26664e-06	up	122	110	95	18	20	21
RPS6KA3	Uncharacterized protein	4451.2	1766.07	2.5204	1.33365	8.19239e-08	1.27976e-06	up	4460	4619	4328	2154	1671	2164
MICALL2	Uncharacterized protein	727.214	202.606	3.5893	1.8437	8.20549e-08	1.28032e-06	up	671	636	877	149	134	444
LOC101796597	uncharacterized LOC101796597	2684.68	273.27	9.8243	3.29635	8.245e-08	1.28387e-06	up	2080	3781	2286	249	188	536
TP53INP1	Tumor protein p53-inducible nuclear protein 1	1520.38	3905.22	0.389321	-1.36097	8.2473e-08	1.28387e-06	down	1623	1319	1622	4204	3469	5739
INHBA	Inhibin beta A chain	1989.33	123.627	16.0914	4.00822	8.30667e-08	1.29162e-06	up	2727	1503	1725	164	100	164
INADL	Uncharacterized protein	2426.34	940.602	2.57957	1.36713	8.49725e-08	1.31972e-06	up	2327	2380	2594	1260	851	1093
LOC101802854	ras-associated and pleckstrin homology domains-containing protein 1-like	1990.96	717.375	2.77534	1.47266	8.64956e-08	1.34183e-06	up	2250	1749	1978	815	446	1309
LOC101802378	Uncharacterized protein	57.8309	589.256	0.0981421	-3.34898	8.83907e-08	1.36965e-06	down	65	40	68	793	694	428
LOC101791354	pro-neuregulin-1, membrane-bound isoform-like	118.819	14.5555	8.16316	3.02913	8.98363e-08	1.39045e-06	up	116	125	117	21	7	25
AGT	Uncharacterized protein	327.727	15734.9	0.0208281	-5.58533	9.01347e-08	1.39201e-06	down	378	98	497	14398	20435	15696
LOC101798446	Uncharacterized protein	148.993	469.917	0.317063	-1.65716	9.01441e-08	1.39201e-06	down	152	159	138	580	464	538
CHL1	cell adhesion molecule with homology to L1CAM (close homolog of L1)	536.866	2461.69	0.218088	-2.19702	9.22186e-08	1.42241e-06	down	788	94	707	2610	2635	2956
P4HA2	Uncharacterized protein	1593.49	536.404	2.9707	1.5708	9.41734e-08	1.4509e-06	up	1624	1330	1827	544	502	784
GPHN	Uncharacterized protein	291.76	821.783	0.355033	-1.49398	9.57978e-08	1.47423e-06	down	275	287	316	1022	703	1103
ALPK2	Uncharacterized protein	230.544	695.385	0.331535	-1.59277	9.77088e-08	1.50105e-06	down	194	263	239	725	670	965
ADRA1B	Uncharacterized protein	0.337881	19.7102	0.0171425	-5.86628	9.77636e-08	1.50105e-06	down	0	0	1	23	8	42
SH3PXD2A	SH3 and PX domains 2A	155.059	26.7103	5.8052	2.53735	9.83322e-08	1.50806e-06	up	192	147	127	51	24	15
LOC101797218	uncharacterized LOC101797218	867.557	3869.68	0.224194	-2.15718	9.85444e-08	1.50959e-06	down	1000	721	881	4691	4303	3764
LPIN3	Uncharacterized protein	66.4336	3.91021	16.9898	4.0866	9.95614e-08	1.52311e-06	up	61	49	89	4	6	2
LOC101794836	Uncharacterized protein	375.554	1199.51	0.31309	-1.67535	9.96536e-08	1.52311e-06	down	319	380	432	1287	1354	1314
HOOK1	Uncharacterized protein	123.126	396.931	0.310195	-1.68875	9.99965e-08	1.52662e-06	down	133	149	90	439	432	446
HIC1	hypermethylated in cancer 1	50.4876	3.11071	16.2302	4.02061	1.00792e-07	1.53702e-06	up	49	51	52	1	6	2
SDC2	Syndecan	1039.81	3201.1	0.324829	-1.62225	1.02369e-07	1.5593e-06	down	798	1368	984	3106	3531	3988
VMP1	Uncharacterized protein	2888.02	1137.82	2.53821	1.34381	1.04315e-07	1.58715e-06	up	2969	2993	2736	1174	1083	1613
CHN2	Uncharacterized protein	293.196	34.9399	8.39143	3.06892	1.04766e-07	1.5922e-06	up	374	224	280	58	46	6
LOC101796021	uncharacterized LOC101796021	31.5027	127.86	0.246384	-2.02102	1.05511e-07	1.60007e-06	down	39	18	37	146	118	172
EPHA3	Uncharacterized protein	1019.19	179.095	5.69079	2.50863	1.05521e-07	1.60007e-06	up	1304	989	771	247	170	188
SIRT5	NAD-dependent protein deacylase sirtuin-5, mitochondrial	85.0856	287.083	0.296379	-1.75448	1.05692e-07	1.60085e-06	down	78	65	112	371	221	409
LOC101795171	tropomyosin alpha-4 chain-like	1538.65	165.312	9.30755	3.2184	1.05843e-07	1.60134e-06	up	975	2032	1656	159	161	241
LOC101789419	GDP-fucose protein O-fucosyltransferase 2	2452.44	797.835	3.07387	1.62006	1.07721e-07	1.62791e-06	up	1969	3212	2247	1061	710	954
CDR2	Uncharacterized protein	241.807	67.3543	3.59007	1.84401	1.08533e-07	1.63835e-06	up	240	245	243	122	63	41
LOC101797981	Uncharacterized protein	384.338	1019.95	0.37682	-1.40805	1.11255e-07	1.67756e-06	down	400	372	384	1127	848	1559
LIMA1	Uncharacterized protein	2567.11	982.486	2.61287	1.38564	1.1462e-07	1.72636e-06	up	2230	2393	3096	1270	1139	798
LOC101793085	Uncharacterized protein	1617.03	620.81	2.60471	1.38112	1.14792e-07	1.72702e-06	up	1357	2060	1477	633	591	888
LOC101803817	C-X-C motif chemokine	389.747	5.54496	70.2884	6.13521	1.16658e-07	1.75313e-06	up	551	214	397	8	3	9
KCNT2	Potassium channel subfamily T member 2	93.2871	327.635	0.284729	-1.81234	1.1719e-07	1.75916e-06	down	137	32	108	463	241	442
AFAP1	Uncharacterized protein	1480.48	262.193	5.64653	2.49737	1.17619e-07	1.76271e-06	up	1874	1473	1106	409	274	185
ZHX1	Zinc fingers and homeoboxes protein 1	516.932	1365.62	0.378533	-1.40151	1.17689e-07	1.76271e-06	down	491	463	599	1655	1080	2018
RALGDS	ral guanine nucleotide dissociation stimulator	171.722	36.8253	4.66316	2.22131	1.17958e-07	1.76478e-06	up	141	153	222	46	24	61
RUNX1	Uncharacterized protein	70.1377	2.18601	32.0848	5.00382	1.18692e-07	1.77378e-06	up	98	54	58	3	1	4
PRSS23	Serine protease 23	12161.6	167.821	72.4679	6.17927	1.1906e-07	1.77608e-06	up	15977	6218	14046	271	149	150
CPA1	Uncharacterized protein	0.318644	431.071	0.000739191	-10.4018	1.1911e-07	1.77608e-06	down	0	1	0	387	605	367
CD55	CD55 molecule, decay accelerating factor for complement (Cromer blood group)	542.743	34.4789	15.7413	3.97648	1.19729e-07	1.78333e-06	up	354	563	719	44	13	71
MMP7	Uncharacterized protein	2723.37	205.102	13.2781	3.73098	1.19867e-07	1.78342e-06	up	1954	2493	3742	228	126	382
LOC101797377	Uncharacterized protein	1233.63	3118.17	0.395627	-1.33779	1.21819e-07	1.81045e-06	down	1455	1118	1132	3357	2768	4585
CACNA1H	Uncharacterized protein	153.364	25.7514	5.95554	2.57423	1.23341e-07	1.83106e-06	up	181	146	134	43	20	26
SLC12A8	Uncharacterized protein	106.841	13.8799	7.69748	2.94439	1.23875e-07	1.83695e-06	up	114	80	126	23	16	6
SMURF2	Uncharacterized protein	901.38	242.528	3.71659	1.89398	1.25386e-07	1.85731e-06	up	1076	693	931	302	184	362
PDXK	Uncharacterized protein	256.856	1006.61	0.25517	-1.97047	1.25861e-07	1.8623e-06	down	175	263	336	1126	1036	1211
PPFIBP1	Uncharacterized protein	1004.18	361.44	2.77826	1.47418	1.28722e-07	1.90254e-06	up	1147	785	1077	372	301	581
RHOJ	Rho-related GTP-binding protein RhoJ	60.683	3.14568	19.2909	4.26985	1.30882e-07	1.93234e-06	up	57	84	43	5	4	1
ACSM3	Acyl-coenzyme A synthetase ACSM3, mitochondrial	22.1446	157.394	0.140695	-2.82936	1.31767e-07	1.94328e-06	down	20	28	19	220	166	136
LEAP2	Uncharacterized protein	26.8478	123.471	0.217441	-2.2013	1.35105e-07	1.99032e-06	down	25	30	26	135	134	141
LOC101804696	non-muscle caldesmon-like	13021.3	722.386	18.0254	4.17196	1.3775e-07	2.02706e-06	up	10506	19181	9873	1250	646	549
LOC101800717	chromosome unknown open reading frame, human C12orf66	123.299	385.586	0.319771	-1.64489	1.42658e-07	2.097e-06	down	116	138	118	447	276	637
ITGA2	integrin, alpha 2 (CD49B, alpha 2 subunit of VLA-2 receptor)	739.854	91.4829	8.08735	3.01567	1.4435e-07	2.11955e-06	up	675	559	983	69	66	190
CHST14	Uncharacterized protein	206.962	46.4924	4.45153	2.1543	1.46103e-07	2.14295e-06	up	227	193	202	68	35	59
SCG2	Secretogranin-2	82.843	10.6646	7.76802	2.95755	1.47297e-07	2.1581e-06	up	103	44	100	8	18	6
C1GALT1	Glycoprotein-N-acetylgalactosamine 3-beta-galactosyltransferase 1	269.841	916.188	0.294526	-1.76353	1.51457e-07	2.21665e-06	down	306	183	318	803	925	1368
F2RL1	Uncharacterized protein	807.07	65.247	12.3695	3.62871	1.53874e-07	2.24957e-06	up	480	871	1084	63	66	91
LOC101801905	insulin receptor substrate 2-B-like	1290.59	486.109	2.65495	1.40868	1.54056e-07	2.24979e-06	up	1215	1501	1181	591	440	629
UBE2E1	Uncharacterized protein	309.446	91.8274	3.36987	1.75269	1.55021e-07	2.26143e-06	up	335	288	307	153	79	81
IRF6	Uncharacterized protein	712.408	136.74	5.20996	2.38127	1.57572e-07	2.29614e-06	up	756	555	824	206	110	156
LOC101796393	protocadherin Fat 4-like	714.434	232.643	3.07095	1.61868	1.60008e-07	2.32575e-06	up	593	694	863	318	179	313
LCA5	Uncharacterized protein	234.023	25.6114	9.13746	3.19179	1.60107e-07	2.32575e-06	up	301	165	234	27	21	41
LOC101798367	uncharacterized LOC101798367	1.31757	38.7985	0.0339594	-4.88005	1.60123e-07	2.32575e-06	down	2	2	0	47	36	49
LOC101804927	uncharacterized LOC101804927	75.8424	5.27846	14.3683	3.84481	1.65069e-07	2.39502e-06	up	71	88	70	7	3	9
SOGA2	Uncharacterized protein	1074.3	86.5445	12.4133	3.63382	1.66331e-07	2.41073e-06	up	1445	863	911	51	107	125
SLC4A7	Uncharacterized protein	626.998	95.0958	6.59333	2.72101	1.71762e-07	2.48676e-06	up	622	834	443	169	72	88
KCTD10	Uncharacterized protein	255.129	64.319	3.96662	1.98791	1.72435e-07	2.49382e-06	up	252	274	243	87	46	93
LOC101794192	plasminogen-like	0.337881	65.4914	0.00515916	-7.59865	1.76472e-07	2.54945e-06	down	0	0	1	95	62	64
LOC101799420	Uncharacterized protein	11.6685	696.659	0.0167493	-5.89976	1.78465e-07	2.57548e-06	down	7	9	19	805	900	523
LOC101799507	chromosome unknown open reading frame, human C14orf79	103.65	14.0759	7.36367	2.88043	1.80701e-07	2.60496e-06	up	76	136	102	20	16	10
PHOSPHO1	Uncharacterized protein	211.685	611.396	0.346231	-1.53019	1.82157e-07	2.62314e-06	down	209	244	186	710	601	752
SLC25A12	Uncharacterized protein	33.1661	151.923	0.218308	-2.19556	1.829e-07	2.63102e-06	down	53	21	25	186	137	196
PITX3	Uncharacterized protein	284.747	70.2911	4.05097	2.01827	1.8386e-07	2.642e-06	up	338	255	262	91	49	108
PALLD	Uncharacterized protein	6633.52	2620.42	2.53147	1.33998	1.86438e-07	2.67538e-06	up	6295	7981	5769	3693	1804	3740
TPD52L1	Uncharacterized protein	76.8621	3.96361	19.3919	4.27739	1.8658e-07	2.67538e-06	up	104	74	53	3	3	8
CRYM	Uncharacterized protein	425.131	137.92	3.08244	1.62407	1.88067e-07	2.69382e-06	up	399	482	402	158	154	143
ATP5S	Uncharacterized protein	910.399	329.029	2.76692	1.46828	1.90952e-07	2.73062e-06	up	887	1045	816	411	273	453
LOC101801230	mothers against decapentaplegic homolog 3-like	1599.7	530.982	3.01273	1.59107	1.91042e-07	2.73062e-06	up	1635	1272	1889	662	409	782
LOC101804690	uncharacterized LOC101804690	81.9819	7.42902	11.0354	3.46406	1.91452e-07	2.73358e-06	up	88	87	72	10	9	5
NR1D2	Uncharacterized protein	119.712	383.427	0.312215	-1.67939	1.9225e-07	2.74207e-06	down	122	132	107	524	344	439
INPP5K	Uncharacterized protein	87.5908	317.861	0.275563	-1.85955	1.96396e-07	2.79822e-06	down	83	111	71	330	369	344
STC2	Uncharacterized protein	9907.13	251.448	39.4004	5.30014	2.00248e-07	2.8501e-06	up	10249	5378	13932	231	378	169
LPIN2	Uncharacterized protein	274.75	978.832	0.280691	-1.83294	2.01746e-07	2.86837e-06	down	255	238	332	884	757	1797
DOPEY2	Uncharacterized protein	995.991	2511.35	0.396596	-1.33426	2.02058e-07	2.86978e-06	down	957	1153	897	3366	2131	3138
LOC101800603	uncharacterized LOC101800603	58.6936	2.68404	21.8676	4.45073	2.0595e-07	2.92197e-06	up	53	64	60	1	3	5
LY75	Uncharacterized protein	1576.45	3999.58	0.394154	-1.34317	2.07613e-07	2.94245e-06	down	1418	1981	1370	4230	4012	5237
LOC101803402	Uncharacterized protein	680.897	229.987	2.96058	1.56588	2.08814e-07	2.95637e-06	up	671	655	722	238	172	399
LOC101804375	Uncharacterized protein	238.157	61.6176	3.86509	1.9505	2.12804e-07	3.00969e-06	up	232	223	261	85	57	67
LOC101799835	Uncharacterized protein	66.5583	320.138	0.207905	-2.266	2.13079e-07	3.01042e-06	down	64	78	59	318	362	377
LOC101795307	elastin-like	135.828	1332.28	0.101952	-3.29404	2.18133e-07	3.07859e-06	down	83	80	243	1101	1245	2218
PEMT	Uncharacterized protein	96.2806	514.877	0.186998	-2.41891	2.2087e-07	3.11394e-06	down	75	115	101	563	588	542
LOC101793343	tumor protein D52-like	2659.9	1096.81	2.42512	1.27805	2.2619e-07	3.1856e-06	up	2210	3170	2658	1441	1178	1013
LOC101802649	parafibromin-like	580.941	191.502	3.0336	1.60103	2.26973e-07	3.19329e-06	up	622	576	550	241	139	293
PIEZO1	Uncharacterized protein	1117.74	405.17	2.75868	1.46398	2.28722e-07	3.21453e-06	up	1154	1153	1059	479	240	738
LMO7	Uncharacterized protein	2224.42	590.872	3.76464	1.91251	2.31962e-07	3.25667e-06	up	1728	3146	1877	754	355	1009
PCBD2	Pterin-4-alpha-carbinolamine dehydratase 2	216.956	627.115	0.345959	-1.53133	2.37994e-07	3.33787e-06	down	209	251	195	682	680	721
MALT1	Uncharacterized protein	353.558	916.55	0.385749	-1.37426	2.39081e-07	3.34963e-06	down	320	417	331	1104	598	1561
ENPP6	Uncharacterized protein	10.0832	80.9566	0.124551	-3.0052	2.40185e-07	3.36159e-06	down	19	5	6	95	85	90
TRPM6	Uncharacterized protein	6.8522	143.988	0.0475886	-4.39324	2.42809e-07	3.39478e-06	down	3	13	5	105	128	265
MAOB	Uncharacterized protein	63.0864	278.366	0.226631	-2.14158	2.47704e-07	3.45963e-06	down	92	51	46	433	250	262
MRVI1	Uncharacterized protein	112.517	16.332	6.88937	2.78437	2.52204e-07	3.51882e-06	up	99	152	90	29	8	22
PARVA	Uncharacterized protein	1229.01	487.88	2.51908	1.33289	2.53008e-07	3.52352e-06	up	1088	1526	1103	641	469	537
LOC101799400	Uncharacterized protein	11.8989	163.753	0.0726636	-3.78262	2.5325e-07	3.52352e-06	down	2	14	20	123	179	245
KLF11	Uncharacterized protein	311.158	91.1941	3.41204	1.77063	2.53327e-07	3.52352e-06	up	341	270	323	101	60	164
RAB31	Uncharacterized protein	818.711	2056.74	0.398063	-1.32893	2.55325e-07	3.54765e-06	down	805	708	945	2539	1807	2706
LOC101790335	Sulfotransferase	11.8156	173.185	0.0682251	-3.87355	2.56444e-07	3.55952e-06	down	21	3	11	285	45	320
FAM117B	family with sequence similarity 117, member B	265.886	737.898	0.360329	-1.47261	2.63664e-07	3.65597e-06	down	292	264	244	1142	506	947
SOCS2	Uncharacterized protein	56.7421	2.20365	25.7491	4.68645	2.6494e-07	3.66987e-06	up	61	61	49	4	1	3
VWA3A	von Willebrand factor A domain containing 3A	147.994	27.549	5.37204	2.42547	2.68684e-07	3.7179e-06	up	134	121	189	28	31	32
LOC101790248	histone H2A.v2-like	593.343	1522.59	0.389694	-1.35959	2.69432e-07	3.72441e-06	down	636	618	533	1907	1414	1854
LOC101793496	transcription factor VBP-like	699.927	1768.7	0.39573	-1.33741	2.70228e-07	3.73158e-06	down	775	644	684	2128	1537	2413
UGP2	Uncharacterized protein	873.718	4721.33	0.185058	-2.43395	2.73482e-07	3.7697e-06	down	662	1046	933	3956	5154	6636
MCCC1	Uncharacterized protein	119.709	381.06	0.314148	-1.67048	2.73548e-07	3.7697e-06	down	87	128	146	533	293	500
FDX1	Uncharacterized protein	421.16	1075.24	0.391689	-1.35222	2.74226e-07	3.7739e-06	down	421	410	436	1361	926	1408
GPR146	Uncharacterized protein	355.364	952.1	0.373243	-1.42181	2.74414e-07	3.7739e-06	down	247	578	258	1025	898	1317
ARPC1B	Uncharacterized protein	129.947	18.9431	6.85987	2.77818	2.82405e-07	3.87982e-06	up	133	93	163	44	14	7
PPL	Uncharacterized protein	142.978	13.3289	10.727	3.42317	2.83728e-07	3.89403e-06	up	116	204	114	22	7	19
GPR158	Uncharacterized protein	172.236	34.8007	4.94922	2.3072	2.85968e-07	3.92076e-06	up	179	201	140	34	34	50
CLIC4	Uncharacterized protein	9858.4	3969.68	2.48343	1.31233	2.96233e-07	4.05736e-06	up	10084	10544	9082	4620	2826	6563
LOC101800275	endothelial protein C receptor-like	96.2751	0	Inf	20	2.99547e-07	4.09566e-06	up	97	153	43	0	0	0
UBTD2	ubiquitin domain containing 2	71.8885	239.527	0.300128	-1.73635	2.99638e-07	4.09566e-06	down	73	83	61	287	191	355
WWP1	NEDD4like E3 ubiquitinprotein ligase WWP1	424.198	1354.72	0.313126	-1.67518	3.00885e-07	4.10854e-06	down	409	479	392	1307	1141	2251
LOC101799748	desumoylating isopeptidase 2-like	18.9219	122.744	0.154157	-2.69752	3.04509e-07	4.1538e-06	down	21	20	16	114	79	247
LOC101792096	PDZ domain-containing protein 2-like	176.825	13.7043	12.9029	3.68962	3.09056e-07	4.21156e-06	up	136	256	145	7	15	24
LOC101799458	protein FAM92A1-like	136.609	22.5889	6.04761	2.59637	3.16709e-07	4.31148e-06	up	109	183	122	31	15	34
MPZL3	Uncharacterized protein	93.9222	10.6804	8.79387	3.1365	3.17562e-07	4.31872e-06	up	95	117	72	21	6	11
FADS2	Uncharacterized protein	238.032	14392.5	0.0165386	-5.91802	3.17982e-07	4.32006e-06	down	182	329	211	15988	22771	4928
PTGR2	Uncharacterized protein	151.416	449.436	0.336903	-1.56959	3.20315e-07	4.34737e-06	down	152	156	148	600	391	549
LOC101796420	Cytochrome P450 2K1	33.5918	1220.42	0.0275248	-5.18312	3.2727e-07	4.43728e-06	down	19	30	52	1212	1939	559
GPR143	G-protein coupled receptor 143	30.9634	156.544	0.197794	-2.33793	3.3007e-07	4.47074e-06	down	18	26	49	196	135	207
PINK1	Uncharacterized protein	23.8148	127.83	0.1863	-2.4243	3.32042e-07	4.48866e-06	down	20	29	23	110	138	179
LOC101801708	Uncharacterized protein	1120.41	347.858	3.22088	1.68746	3.32061e-07	4.48866e-06	up	1040	983	1342	372	230	638
SERPINB1	Uncharacterized protein	130.083	987.765	0.131694	-2.92474	3.33518e-07	4.50384e-06	down	62	183	150	947	749	1778
JAM3	Uncharacterized protein	189.59	41.2153	4.6	2.20163	3.36837e-07	4.54315e-06	up	198	232	143	55	59	14
GRAMD1C	GRAM domain containing 1C	138.293	406.159	0.340489	-1.55432	3.37105e-07	4.54315e-06	down	161	84	168	408	352	642
CRIP1	cysteine-rich protein 1 (intestinal)	84.866	9.93463	8.54245	3.09465	3.4455e-07	4.63884e-06	up	83	77	95	15	5	16
2015-09-07	Uncharacterized protein	3781.66	1570.65	2.4077	1.26765	3.49042e-07	4.69461e-06	up	3600	4651	3182	2032	1474	1819
CRLF1	Uncharacterized protein	51.3503	1.79524	28.6036	4.83813	3.54092e-07	4.75778e-06	up	37	75	44	1	2	3
LOC101804634	Uncharacterized protein	215.212	611.49	0.351947	-1.50657	3.59054e-07	4.81963e-06	down	202	253	195	794	530	774
FIBCD1	Uncharacterized protein	41.611	0	Inf	20	3.63021e-07	4.86803e-06	up	51	56	19	0	0	0
PFKL	Uncharacterized protein	1465.57	580.965	2.52265	1.33494	3.81605e-07	5.11214e-06	up	1433	1371	1602	692	517	781
NADSYN1	Uncharacterized protein	122.373	380.805	0.321353	-1.63777	3.83652e-07	5.13444e-06	down	112	133	124	462	370	454
LOC101797689	uncharacterized LOC101797689	0	37.1275	0	-20	3.85201e-07	5.15005e-06	down	0	0	0	49	45	26
WWC3	Uncharacterized protein	782.377	281.878	2.77559	1.47279	3.85638e-07	5.15078e-06	up	862	689	798	348	203	441
LOC101799048	Uncharacterized protein C1orf172-like protein	173.536	18.3233	9.47079	3.24349	4.03064e-07	5.37818e-06	up	241	88	188	27	17	18
LOC101802465	protein HEXIM1-like	143.29	433.895	0.330241	-1.59841	4.08836e-07	5.4451e-06	down	136	155	141	501	392	591
ERC1	ELKS/RAB6-interacting/CAST family member 1	3127.15	1278.58	2.4458	1.29031	4.08889e-07	5.4451e-06	up	3254	3365	2806	1630	1122	1629
IDH1	Isocitrate dehydrogenase [NADP]	2345.21	5670.01	0.413617	-1.27363	4.10925e-07	5.4668e-06	down	2212	2562	2298	7549	4957	6910
LOC101795698	disintegrin and metalloproteinase domain-containing protein 19-like	68.7345	5.02882	13.6681	3.77274	4.17183e-07	5.54457e-06	up	57	87	64	13	4	0
CEP170B	centrosomal protein 170B	1962.6	704.706	2.78499	1.47767	4.19913e-07	5.57535e-06	up	1967	2452	1516	939	653	800
MEF2A	Myogenic enhancer factors 2a	491.175	1545.18	0.317875	-1.65347	4.25159e-07	5.63943e-06	down	446	655	387	1709	1083	2677
IFT46	Uncharacterized protein	157.211	33.8023	4.65089	2.21751	4.26112e-07	5.64651e-06	up	144	170	160	54	21	45
NDST1	Uncharacterized protein	976.968	367.081	2.66145	1.41221	4.30515e-07	5.69924e-06	up	743	1098	1108	456	290	531
RECK	Uncharacterized protein	448.466	142.216	3.1534	1.65691	4.34049e-07	5.74037e-06	up	526	408	413	192	110	193
POR	Uncharacterized protein	732.978	1816.83	0.403437	-1.30958	4.36218e-07	5.76339e-06	down	509	774	927	1781	1740	2659
SLC31A1	Uncharacterized protein	1800.91	717.479	2.51006	1.32772	4.39246e-07	5.79771e-06	up	1920	1525	1959	984	585	910
TIAM2	Uncharacterized protein	208.634	54.0805	3.85784	1.9478	4.42992e-07	5.84142e-06	up	206	209	213	85	46	54
LOXL1	Uncharacterized protein	208.25	8.38808	24.8269	4.63383	4.50257e-07	5.9314e-06	up	131	308	194	16	8	4
LOC101798558	uncharacterized LOC101798558	293.622	760.778	0.38595	-1.37351	4.61358e-07	6.07169e-06	down	304	299	281	871	585	1205
NARS2	Uncharacterized protein	897.239	192.459	4.66197	2.22094	4.78718e-07	6.29399e-06	up	1073	662	951	263	143	267
IVNS1ABP	Uncharacterized protein	2533.57	1000.81	2.53152	1.34	4.82544e-07	6.3381e-06	up	2038	2990	2627	1211	654	1697
CCDC68	coiled-coil domain containing 68	149.913	28.4383	5.27152	2.39822	4.89087e-07	6.41777e-06	up	131	179	143	24	29	43
ARHGAP18	Uncharacterized protein	127.638	23.1212	5.52039	2.46477	4.91694e-07	6.4457e-06	up	136	108	139	39	23	15
USP28	Ubiquitin carboxyl-terminal hydrolase	143.084	705.455	0.202826	-2.30169	5.00657e-07	6.55681e-06	down	113	163	156	883	408	1248
MOB3C	MOB kinase activator 3C	89.1227	10.2898	8.66126	3.11458	5.05451e-07	6.61315e-06	up	74	83	111	17	2	20
NIPAL4	Uncharacterized protein	1.69393	30.9938	0.0546537	-4.19354	5.08869e-07	6.6514e-06	down	2	0	3	54	24	29
MXRA7	matrix-remodelling associated 7	1884.93	696.257	2.70724	1.43682	5.12333e-07	6.69017e-06	up	1580	2369	1754	978	664	707
LOC101793416	sterile alpha motif domain-containing protein 11-like	84.107	8.56637	9.81827	3.29547	5.14438e-07	6.70566e-06	up	85	64	103	12	8	9
IVD	Uncharacterized protein	142.666	402.028	0.354867	-1.49465	5.14516e-07	6.70566e-06	down	160	120	148	589	304	507
KDM1B	Uncharacterized protein	198.056	533.424	0.371291	-1.42938	5.17748e-07	6.74125e-06	down	172	228	198	617	451	774
MREG	Uncharacterized protein	87.7293	9.02849	9.71694	3.2805	5.18764e-07	6.74239e-06	up	64	84	116	12	6	14
GORASP1	Uncharacterized protein	308.623	1307.75	0.235996	-2.08317	5.18838e-07	6.74239e-06	down	293	361	278	1548	1486	1262
PDHA1	Pyruvate dehydrogenase E1 component subunit alpha	703.669	1777.91	0.395784	-1.33721	5.29316e-07	6.87191e-06	down	720	847	559	2144	1836	1963
LOC101796284	tRNA wybutosine-synthesizing protein 2/3/4-like	26.163	128.409	0.203748	-2.29514	5.5025e-07	7.13681e-06	down	21	30	28	169	140	115
RNF141	Uncharacterized protein	237.922	645.293	0.368704	-1.43947	5.54836e-07	7.18934e-06	down	247	237	232	862	677	606
CTNND2	Catenin delta-2	349.134	105.496	3.30945	1.72659	5.66414e-07	7.3323e-06	up	374	425	256	158	80	129
LOC101793364	uncharacterized LOC101793364	122.253	20.5275	5.95561	2.57425	5.6785e-07	7.34383e-06	up	131	159	80	27	15	30
LOC101803165	elastin-like	434.034	4514.73	0.0961374	-3.37876	5.69797e-07	7.36193e-06	down	266	267	765	3565	4560	7158
SERPINI1	Uncharacterized protein	106.571	731.556	0.145677	-2.77915	5.72784e-07	7.39343e-06	down	149	63	106	1357	377	894
LRPAP1	Uncharacterized protein	963.65	367.966	2.61886	1.38894	5.79264e-07	7.46924e-06	up	1053	931	914	490	313	462
LOC101805383	Galectin	868.877	64.3848	13.4951	3.75436	5.79768e-07	7.46924e-06	up	548	1214	875	129	64	20
LOC101800934	uncharacterized LOC101800934	117.767	672.462	0.175128	-2.51352	5.84329e-07	7.52079e-06	down	116	127	112	768	444	1182
AP3B2	Uncharacterized protein	65.7576	1.17294	56.0623	5.80896	5.85294e-07	7.52601e-06	up	38	99	63	2	1	1
GLIS3	Uncharacterized protein	784.204	187.324	4.18634	2.06569	5.93e-07	7.61781e-06	up	680	678	997	246	151	252
NBR1	Uncharacterized protein	1792.04	4253.88	0.421273	-1.24717	6.0625e-07	7.78059e-06	down	1823	1922	1656	4579	3475	6729
APBB2	Uncharacterized protein	742.849	287.425	2.58449	1.36988	6.09371e-07	7.81319e-06	up	768	748	720	358	344	231
PSPH	Uncharacterized protein	124.912	10384	0.0120293	-6.37731	6.12594e-07	7.84009e-06	down	156	94	124	9516	16229	6032
LOC101791940	Uncharacterized protein	927.532	352.576	2.63073	1.39546	6.12635e-07	7.84009e-06	up	823	867	1099	456	293	468
NPAS3	Neuronal PAS domain-containing protein 3	3.28941	59.3615	0.0554131	-4.17363	6.2343e-07	7.97066e-06	down	3	5	2	74	53	76
KIF17	Kinesin-like protein	62.0196	4.24806	14.5995	3.86785	6.38808e-07	8.15736e-06	up	60	50	76	3	5	6
PPP1R3D	protein phosphatase 1, regulatory subunit 3D	173.434	494.035	0.351057	-1.51022	6.39332e-07	8.15736e-06	down	150	188	185	607	443	639
PLS1	Uncharacterized protein	152.216	2.70137	56.3478	5.81629	6.39852e-07	8.15736e-06	up	83	159	217	4	1	5
ATP1B3	Uncharacterized protein	3286.14	1286.47	2.55439	1.35298	6.4729e-07	8.24437e-06	up	3776	3417	2702	1624	893	2027
SLC2A13	Uncharacterized protein	159.611	451.892	0.353207	-1.50141	6.49396e-07	8.26337e-06	down	156	152	172	711	398	429
WDR91	WD repeat domain 91	521.276	191.786	2.71801	1.44255	6.65839e-07	8.46459e-06	up	486	623	466	249	182	218
OVOL2	Uncharacterized protein	49.4744	1.93715	25.5397	4.67467	6.70191e-07	8.51187e-06	up	54	34	60	3	1	3
CCDC89	coiled-coil domain containing 89	58.847	4.71049	12.4928	3.64302	6.73775e-07	8.54932e-06	up	48	73	57	1	5	10
SLC35A5	Uncharacterized protein	736.046	274.84	2.67809	1.4212	6.83646e-07	8.66639e-06	up	752	766	699	342	233	372
LOC101801308	Uncharacterized protein	47.3641	168.962	0.280324	-1.83483	6.92718e-07	8.77312e-06	down	38	54	51	259	204	81
MFAP5	Uncharacterized protein	877.587	29.947	29.3046	4.87306	6.99089e-07	8.84548e-06	up	615	1419	640	39	22	44
BTG2	Uncharacterized protein	1187.2	5177.78	0.229288	-2.12477	7.00916e-07	8.86026e-06	down	1171	758	1620	5748	3457	9218
KYNU	Uncharacterized protein	18.9548	100.423	0.188749	-2.40546	7.09603e-07	8.96165e-06	down	10	17	30	80	96	167
BDH2	Uncharacterized protein	107.597	345.575	0.311356	-1.68336	7.15997e-07	9.02851e-06	down	67	123	135	444	310	426
LOC101799524	agrin-like	2699.79	297.792	9.06602	3.18047	7.16239e-07	9.02851e-06	up	3172	1719	3176	307	187	574
CEND1	cell cycle exit and neuronal differentiation 1	69.7114	4.72704	14.7474	3.88239	7.29363e-07	9.18533e-06	up	53	106	53	10	4	2
GHR	Growth hormone receptor	1676.44	7485.86	0.223947	-2.15877	7.38614e-07	9.29313e-06	down	1608	1513	1916	7757	5265	13500
ELMO3	Uncharacterized protein	474.93	166.865	2.84619	1.50903	7.39939e-07	9.30111e-06	up	401	493	537	241	146	183
LOC101803666	Integrin beta	4644.45	1355.54	3.42627	1.77664	7.44746e-07	9.35279e-06	up	4431	3914	5594	1890	854	2081
LOC101804981	Uncharacterized protein	523.537	1286.23	0.407033	-1.29678	7.7612e-07	9.73771e-06	down	442	553	583	1560	1020	1895
LOC101797452	Uncharacterized protein	122.059	363.519	0.335771	-1.57445	7.85874e-07	9.84233e-06	down	119	115	133	395	416	384
NRP2	Uncharacterized protein	205.13	50.9141	4.02895	2.0104	7.85923e-07	9.84233e-06	up	209	251	160	103	46	22
MYO7B	Uncharacterized protein	2526.86	1040.84	2.42771	1.2796	7.89293e-07	9.87534e-06	up	2276	3033	2327	1366	785	1486
LOC101790436	zinc finger protein 608-like	272.785	81.4017	3.3511	1.74463	7.91671e-07	9.89589e-06	up	222	266	333	86	56	147
LACTB2	Uncharacterized protein	380.286	1556.5	0.244322	-2.03315	7.92753e-07	9.90021e-06	down	321	468	361	1894	1843	1330
LOC101796494	uncharacterized LOC101796494	1310.17	381.364	3.43547	1.78051	7.9636e-07	9.93603e-06	up	1321	1181	1434	395	356	550
BAK1	Uncharacterized protein	1060.23	426.035	2.48859	1.31533	8.08269e-07	1.00753e-05	up	947	1308	951	531	403	510
INSIG1	Insulin-induced gene protein	604.118	10732.4	0.0562894	-4.15099	8.1244e-07	1.01179e-05	down	651	850	331	11485	15967	5735
TMCO3	Uncharacterized protein	401.335	85.3396	4.7028	2.23352	8.42151e-07	1.04782e-05	up	389	541	286	148	62	87
IQSEC1	Uncharacterized protein	473.649	1183.42	0.400238	-1.32107	8.44073e-07	1.04924e-05	down	569	351	498	1536	1007	1528
LOC101797898	A-kinase anchor protein 2-like	12.3846	90.8159	0.13637	-2.8744	8.87803e-07	1.10258e-05	down	3	24	11	138	65	115
SLC9B2	Uncharacterized protein	68.1911	241.913	0.281883	-1.82683	9.137e-07	1.1337e-05	down	56	80	70	261	232	328
CYFIP1	Uncharacterized protein	2003.97	812.088	2.46767	1.30315	9.26655e-07	1.14871e-05	up	1833	2411	1812	1059	590	1202
SLC25A32	Uncharacterized protein	391.682	136.458	2.87034	1.52122	9.27607e-07	1.14883e-05	up	387	340	449	182	104	190
THBS3	Uncharacterized protein	395.892	25.2731	15.6646	3.96943	9.3965e-07	1.16268e-05	up	271	371	549	32	25	28
LOC101799714	Transthyretin	5.68285	60.7839	0.0934927	-3.419	9.54063e-07	1.17943e-05	down	7	4	6	74	70	55
NR5A2	Uncharacterized protein	2005.39	4806.67	0.41721	-1.26116	9.64785e-07	1.19159e-05	down	1748	3065	1285	6281	4505	5509
TES	Uncharacterized protein	2136.47	897.848	2.37955	1.25069	9.67901e-07	1.19434e-05	up	1972	2407	2068	1152	814	1095
RHBG	Uncharacterized protein	35.1013	0.391083	89.7541	6.48791	9.71476e-07	1.19765e-05	up	33	41	32	0	1	0
RAP1GDS1	Rap1 GTPase-GDP dissociation stimulator 1	1001.75	397.937	2.51737	1.33192	9.78026e-07	1.20462e-05	up	895	1215	918	488	377	484
LIMS2	Uncharacterized protein	2458.33	1018.1	2.41463	1.2718	9.80964e-07	1.20713e-05	up	2211	2829	2382	1302	773	1482
FLT1	Receptor protein-tyrosine kinase	638.034	131.233	4.86183	2.2815	9.89223e-07	1.21618e-05	up	434	853	647	178	115	156
LOC101803259	D-amino-acid oxidase-like	15.6077	98.9838	0.157679	-2.66494	9.99826e-07	1.22744e-05	down	7	15	25	79	114	134
DNAJC19	Uncharacterized protein	233.827	620.196	0.377021	-1.40728	1.0002e-06	1.22744e-05	down	252	187	262	822	537	768
GCSH	Uncharacterized protein	191.531	526.315	0.36391	-1.45835	1.00568e-06	1.23304e-05	down	213	168	194	754	524	484
LOC101791572	ras GTPase-activating-like protein IQGAP1-like	437.541	1106.27	0.39551	-1.33821	1.01044e-06	1.23775e-05	down	573	314	422	1288	1050	1416
MRPL27	Uncharacterized protein	29.6707	128.82	0.230327	-2.11824	1.01803e-06	1.2459e-05	down	44	26	19	144	90	222
HUNK	Uncharacterized protein	115.991	324.523	0.35742	-1.48431	1.07052e-06	1.30895e-05	down	107	148	96	466	182	519
DEPTOR	Uncharacterized protein	141.538	797.516	0.177473	-2.49433	1.08232e-06	1.32218e-05	down	132	70	220	815	908	905
SCD	Uncharacterized protein	3155.34	40584.1	0.0777483	-3.68504	1.09886e-06	1.3404e-05	down	3260	2515	3685	43947	51593	34940
IBA57	Uncharacterized protein	154.274	409.117	0.37709	-1.40702	1.09923e-06	1.3404e-05	down	174	133	156	616	305	505
CIB3	Uncharacterized protein	470.856	167.455	2.81184	1.49151	1.1063e-06	1.34759e-05	up	396	511	513	220	151	200
SERPINB5	Uncharacterized protein	1150.45	50.316	22.8646	4.51504	1.10766e-06	1.34759e-05	up	689	1716	1093	57	51	61
ZC3H12C	Uncharacterized protein	137.17	25.8577	5.3048	2.4073	1.10813e-06	1.34759e-05	up	142	105	164	45	17	29
LOC101802915	chromosome unknown open reading frame, human C12orf23	460.317	156.045	2.94989	1.56066	1.11192e-06	1.35097e-05	up	502	439	443	200	131	207
LOC101793663	alpha-2-macroglobulin-like protein 1-like	10.7103	51.1522	0.209382	-2.25579	1.11527e-06	1.35382e-05	down	6	6	20	54	66	44
BATF3	Uncharacterized protein	42.7917	9.13496	4.68439	2.22786	1.12443e-06	1.36371e-05	up	35	63	32	14	10	6
LOC101796846	calumenin-like	268.209	85.33	3.1432	1.65223	1.12591e-06	1.36428e-05	up	226	276	306	89	71	136
LOC101802047	probable proline--tRNA ligase, mitochondrial-like	68.1825	223.821	0.30463	-1.71487	1.15093e-06	1.39334e-05	down	74	65	66	235	220	302
LOC101800696	Phospholipid-translocating ATPase	758.388	1808.71	0.419297	-1.25396	1.17362e-06	1.41953e-05	down	675	667	936	2250	1532	2451
RPL22L1	Uncharacterized protein	457.007	1105.67	0.413331	-1.27463	1.18672e-06	1.43408e-05	down	340	715	336	1379	793	1720
MAML3	Uncharacterized protein	730.831	120.922	6.04384	2.59547	1.18974e-06	1.43644e-05	up	977	642	574	188	99	129
TEX2	Uncharacterized protein	786.491	1918.72	0.409904	-1.28664	1.20039e-06	1.448e-05	down	719	915	741	1966	1954	2534
ABTB1	Uncharacterized protein	492.914	1566.69	0.314621	-1.66831	1.20782e-06	1.45566e-05	down	355	589	546	1469	1271	2725
SLC22A18	Uncharacterized protein	107.888	377.96	0.285447	-1.8087	1.21226e-06	1.4597e-05	down	50	141	136	456	293	570
PCDH1	Uncharacterized protein	1063.49	428.758	2.4804	1.31058	1.2184e-06	1.46548e-05	up	910	1081	1212	500	391	573
YDJC	Uncharacterized protein	292.455	90.9775	3.21458	1.68463	1.22022e-06	1.46548e-05	up	310	255	313	127	71	118
MPC1	Uncharacterized protein	737.035	2493.54	0.295578	-1.75839	1.22033e-06	1.46548e-05	down	603	943	685	2803	2793	2629
LOC101796924	ras-related protein Rab-43-like	1022.29	4227.9	0.241795	-2.04814	1.23086e-06	1.47682e-05	down	972	1193	922	5685	4618	3644
LOC101793079	engulfment and cell motility protein 1-like	33.9263	133.788	0.253582	-1.97948	1.25028e-06	1.49777e-05	down	26	31	45	208	82	186
DIP2B	Uncharacterized protein	3039.62	1282.38	2.37029	1.24507	1.25055e-06	1.49777e-05	up	2879	3076	3197	1483	1062	1896
SH3KBP1	SH3-domain kinase binding protein 1	497.894	117.675	4.23109	2.08103	1.25397e-06	1.50053e-05	up	339	662	508	143	108	150
2015-03-02	Uncharacterized protein	1018.33	2417.79	0.421182	-1.24748	1.26e-06	1.5064e-05	down	878	931	1252	2661	2320	3220
TIPARP	Uncharacterized protein	939.601	253.014	3.71364	1.89283	1.26199e-06	1.50743e-05	up	1094	693	1026	318	177	398
PLCB2	Phosphoinositide phospholipase C	56.0758	3.66104	15.3169	3.93705	1.26785e-06	1.51309e-05	up	70	44	54	6	4	2
PJA2	Uncharacterized protein	30.3906	170.5	0.178244	-2.48808	1.27627e-06	1.52179e-05	down	38	23	30	171	112	326
BEND6	BEN domain containing 6	401.51	135.761	2.95748	1.56437	1.29041e-06	1.53729e-05	up	377	390	441	213	104	154
ETV4	Uncharacterized protein	580.952	37.1434	15.6408	3.96724	1.29396e-06	1.54015e-05	up	796	350	588	60	28	41
PPAP2A	Uncharacterized protein	106.811	596.952	0.178927	-2.48256	1.32132e-06	1.57133e-05	down	113	99	109	508	486	1091
PRKCA	Protein kinase C	233.504	617.775	0.377976	-1.40364	1.32596e-06	1.57472e-05	down	232	219	251	715	521	898
LOC101799848	uncharacterized LOC101799848	222.248	2.8439	78.1489	6.28815	1.32651e-06	1.57472e-05	up	157	163	346	2	4	3
CHRM3	Muscarinic acetylcholine receptor	195.053	3.90928	49.8949	5.64082	1.35161e-06	1.6031e-05	up	148	311	135	10	0	5
CLDN1	Claudin	7620.48	1134.44	6.71742	2.74791	1.35785e-06	1.60909e-05	up	4532	11128	7497	1155	1513	944
SWAP70	Uncharacterized protein	1106.37	396.317	2.79164	1.48111	1.3593e-06	1.60938e-05	up	1077	909	1333	368	356	639
CCDC85C	Uncharacterized protein	201.639	813.68	0.247811	-2.01269	1.36309e-06	1.61245e-05	down	188	149	267	742	714	1353
SNAPC5	Uncharacterized protein	70.0298	237.746	0.294557	-1.76338	1.36789e-06	1.6167e-05	down	71	74	66	313	212	287
LOC101803041	Uncharacterized protein C11orf24-like protein	1735.29	737.556	2.35275	1.23435	1.41845e-06	1.675e-05	up	1401	2030	1811	806	708	988
G6PC	glucose-6-phosphatase, catalytic subunit	131.307	1051.09	0.124925	-3.00087	1.43834e-06	1.69699e-05	down	48	65	279	1361	555	1894
TRIM7	tripartite motif containing 7	2.70757	57.281	0.0472682	-4.40299	1.46009e-06	1.72113e-05	down	2	0	6	83	74	25
SLC35E2	Solute carrier family 35 member E2	243.779	636.558	0.382965	-1.38472	1.47145e-06	1.73301e-05	down	211	262	262	764	556	866
EPPK1	epiplakin 1	546.433	161.65	3.38034	1.75717	1.48097e-06	1.74234e-05	up	635	615	398	286	102	183
LOC101804010		141.059	12.2444	11.5203	3.5261	1.48196e-06	1.74234e-05	up	155	80	186	23	8	12
UGT8	2-hydroxyacylsphingosine 1-beta-galactosyltransferase	277.706	827.27	0.33569	-1.5748	1.4889e-06	1.74897e-05	down	505	61	256	1089	847	827
HECW1	Uncharacterized protein	192.504	33.2877	5.78305	2.53183	1.50897e-06	1.771e-05	up	245	209	126	49	32	31
TRPS1	Uncharacterized protein	69.3307	6.41564	10.8065	3.43383	1.52254e-06	1.78537e-05	up	91	60	57	11	7	3
MICAL3	Uncharacterized protein	1535.67	4477.28	0.342992	-1.54376	1.52803e-06	1.79024e-05	down	1020	2210	1434	4839	3395	7474
ACO1	Aconitate hydratase	1151.51	2734.01	0.421181	-1.24749	1.53155e-06	1.7928e-05	down	1051	1317	1108	3120	2623	3523
SC5D	Uncharacterized protein	233.747	817.788	0.285828	-1.80678	1.55196e-06	1.81512e-05	down	199	343	168	908	1046	670
SLITRK6	Uncharacterized protein	82.2804	3.12804	26.3041	4.71722	1.56801e-06	1.83229e-05	up	78	123	49	4	4	2
LOC101794316	Uncharacterized protein	0.656525	34.3552	0.0191099	-5.70954	1.57399e-06	1.83768e-05	down	0	1	1	43	42	26
COL11A1	Uncharacterized protein	1627.66	37.7302	43.1394	5.43094	1.59804e-06	1.86415e-05	up	2423	1299	1153	57	15	67
SBNO2	Uncharacterized protein	947.524	282.693	3.35178	1.74493	1.60414e-06	1.86965e-05	up	922	700	1216	370	213	405
GPA33	Uncharacterized protein	127.754	12.1206	10.5402	3.39783	1.60887e-06	1.87354e-05	up	78	183	127	18	6	20
SLC2A10	Uncharacterized protein	429.465	145.138	2.959	1.56511	1.62259e-06	1.88788e-05	up	396	432	465	271	84	161
ADH5	Uncharacterized protein	902.375	2147.69	0.42016	-1.25099	1.63303e-06	1.89838e-05	down	924	922	871	2564	1978	2776
DYNLT1	Uncharacterized protein	304.455	92.879	3.27798	1.71281	1.63667e-06	1.90096e-05	up	259	398	265	132	82	103
DCAF13	Uncharacterized protein	1244.95	509.381	2.44404	1.28927	1.68965e-06	1.96081e-05	up	1059	1379	1318	685	389	702
STAB2	Uncharacterized protein	9.93838	65.9369	0.150726	-2.73	1.69275e-06	1.96271e-05	down	6	11	13	84	42	109
LCLAT1	Uncharacterized protein	884.115	2040.18	0.43335	-1.20639	1.71822e-06	1.99053e-05	down	784	959	923	2393	1525	3239
LOC101801006	uncharacterized LOC101801006	49.3843	181.814	0.27162	-1.88034	1.72586e-06	1.99766e-05	down	29	106	17	248	175	190
SLC7A6	Uncharacterized protein	352.893	70.7177	4.99017	2.31909	1.72812e-06	1.99856e-05	up	388	442	237	97	88	42
RIMKLB	Uncharacterized protein	102.235	11.2493	9.08814	3.18398	1.75502e-06	2.02793e-05	up	65	138	107	21	10	7
SUCO	Uncharacterized protein	1260.31	3417.29	0.368804	-1.43907	1.77061e-06	2.04419e-05	down	1049	1633	1134	4053	3742	3511
DLEC1	Uncharacterized protein	118.386	336.768	0.351536	-1.50826	1.77803e-06	2.05099e-05	down	108	129	120	364	272	536
OTUD1	Uncharacterized protein	124.368	313.555	0.396639	-1.3341	1.79528e-06	2.06911e-05	down	51	268	64	344	239	516
HACL1	Uncharacterized protein	55.8043	192.733	0.289543	-1.78815	1.83191e-06	2.10952e-05	down	35	54	79	214	151	308
ACAP3	Uncharacterized protein	302.277	95.0518	3.18013	1.66909	1.85795e-06	2.13767e-05	up	247	422	248	100	75	157
EREG	Uncharacterized protein	61.9241	169.378	0.365598	-1.45167	1.88497e-06	2.16691e-05	down	64	73	50	194	131	267
SLC26A9	Uncharacterized protein	5723.86	2445.48	2.34059	1.22687	1.89458e-06	2.1761e-05	up	4844	6691	5754	2599	1805	4207
LASP1	Uncharacterized protein	1718.51	717.956	2.39362	1.25919	1.8985e-06	2.17874e-05	up	1369	1985	1836	745	590	1160
CDH17	Uncharacterized protein	3087.83	24.9004	124.007	6.95428	1.9013e-06	2.18009e-05	up	3620	1307	4262	25	11	56
DUSP1	Uncharacterized protein	818.676	332.433	2.46268	1.30023	1.9062e-06	2.18385e-05	up	618	1004	854	342	260	561
LOC101800395	DENN domain-containing protein 1A-like	132.479	412.883	0.320862	-1.63998	1.92936e-06	2.2085e-05	down	141	138	120	497	292	668
PMM1	Phosphomannomutase	34.7872	224.95	0.154644	-2.69298	1.93583e-06	2.21403e-05	down	18	38	49	164	221	381
EVL	Uncharacterized protein	67.7434	229.964	0.294582	-1.76326	1.94655e-06	2.22439e-05	down	67	87	51	285	229	259
MCC	Uncharacterized protein	728.816	251.248	2.90078	1.53644	1.95601e-06	2.23331e-05	up	654	621	913	371	221	265
SDC4	Syndecan	2129.79	537.989	3.9588	1.98506	1.97038e-06	2.24781e-05	up	1594	2833	2027	481	248	1257
PPP2R2C	Serine/threonine-protein phosphatase 2A 55 kDa regulatory subunit B	232.755	65.9607	3.5287	1.81914	1.99089e-06	2.26928e-05	up	212	238	251	45	82	88
FGFR3	Receptor protein-tyrosine kinase	292.364	741.271	0.39441	-1.34223	2.01163e-06	2.29097e-05	down	270	255	353	815	726	965
LOC101804180	parafibromin-like	300.745	92.5234	3.25047	1.70065	2.03507e-06	2.31571e-05	up	316	299	290	130	64	132
SPRY1	Uncharacterized protein	9.25017	52.8779	0.174934	-2.51511	2.04314e-06	2.32293e-05	down	9	12	7	41	57	79
LOC101804621	Ribonuclease inhibitor	3119.13	1347.87	2.31412	1.21046	2.08692e-06	2.3707e-05	up	2765	3777	2886	1725	1055	1911
CARKD	ATP-dependent (S)-NAD(P)H-hydrate dehydratase	133.566	367.719	0.363229	-1.46105	2.10737e-06	2.39191e-05	down	135	151	117	474	315	475
HHIPL1	Uncharacterized protein	51.0959	197.931	0.25815	-1.95372	2.1625e-06	2.45063e-05	down	58	38	57	291	164	226
EHD3	Uncharacterized protein	3951.48	1733.96	2.27888	1.18832	2.16275e-06	2.45063e-05	up	3741	4376	3802	2289	1495	2167
STX17	Uncharacterized protein	198.693	514.119	0.386473	-1.37156	2.19728e-06	2.48766e-05	down	229	184	184	625	442	702
P2RY14	Uncharacterized protein	32.9194	0.266499	123.525	6.94866	2.20514e-06	2.49446e-05	up	29	31	39	1	0	0
LOC101791437	guanine nucleotide-binding protein G(o) subunit alpha-like	225.235	60.2514	3.73826	1.90237	2.21457e-06	2.50302e-05	up	255	230	193	66	55	85
RWDD1	RWD domain containing 1	71.8942	225.478	0.318852	-1.64904	2.21879e-06	2.50569e-05	down	67	82	68	331	190	253
ATL1	Uncharacterized protein	1656.17	360.452	4.59469	2.19997	2.24018e-06	2.52772e-05	up	1149	1775	2071	449	309	482
ETFA	Uncharacterized protein	1004.31	2277.69	0.440932	-1.18137	2.30645e-06	2.60032e-05	down	1093	842	1078	2749	1779	3413
TAX1BP3	Uncharacterized protein	1664.16	692.726	2.40233	1.26443	2.32428e-06	2.61822e-05	up	1533	2002	1494	784	560	1064
KIAA1199	Uncharacterized protein	321.213	28.0121	11.467	3.51941	2.34928e-06	2.64365e-05	up	205	469	302	20	23	55
RAB4A	Uncharacterized protein	89.3804	268.745	0.332585	-1.58821	2.35078e-06	2.64365e-05	down	97	125	49	335	268	300
SCEL	Uncharacterized protein	70.5687	7.03873	10.0258	3.32564	2.35722e-06	2.64867e-05	up	53	79	81	4	7	13
LOC101799912	Uncharacterized protein	112.301	15.8349	7.09202	2.8262	2.40056e-06	2.69511e-05	up	119	148	73	25	12	18
SLC29A1	Uncharacterized protein	148.622	26.2673	5.65806	2.50031	2.41107e-06	2.70466e-05	up	211	115	119	40	17	36
NCOA7	Uncharacterized protein	524.609	193.259	2.71454	1.44071	2.41414e-06	2.70585e-05	up	539	456	580	270	167	225
AGMO	Uncharacterized protein	145.211	403.087	0.360247	-1.47294	2.44145e-06	2.73418e-05	down	125	89	220	397	400	566
ASB2	Ankyrin repeat and SOCS box protein 2	81.6871	5.04786	16.1825	4.01636	2.45496e-06	2.74702e-05	up	73	83	90	4	7	5
ABCD4	Uncharacterized protein	130.996	43.045	3.04323	1.6056	2.45739e-06	2.74746e-05	up	118	107	168	62	43	39
ACN9	Uncharacterized protein	57.8096	199.112	0.290337	-1.7842	2.48785e-06	2.7792e-05	down	46	74	55	235	209	220
LOC101794840	tolloid-like protein 2-like	75.8754	2.11466	35.8806	5.16513	2.50393e-06	2.79484e-05	up	100	37	89	5	2	0
LOC101798090	uncharacterized LOC101798090	294.863	47.2571	6.23955	2.64144	2.51576e-06	2.80572e-05	up	369	207	306	67	44	49
PCCB	Uncharacterized protein	259.906	649.424	0.400211	-1.32117	2.53419e-06	2.82394e-05	down	235	252	295	780	466	1042
HPRT1	Uncharacterized protein	408.329	145.65	2.8035	1.48723	2.55315e-06	2.84271e-05	up	436	464	332	169	88	266
MTO1	Protein MTO1-like protein, mitochondrial	157.786	396.563	0.397883	-1.32958	2.56053e-06	2.84856e-05	down	143	140	191	513	268	623
ARMC7	armadillo repeat containing 7	32.1463	117.758	0.272987	-1.87309	2.62682e-06	2.9199e-05	down	37	37	23	186	84	142
PITPNA	Uncharacterized protein	928.985	377.761	2.45919	1.29818	2.6348e-06	2.92634e-05	up	922	1049	832	489	333	471
LOC101797486	methyltransferase-like protein 7A-like	48.4954	831.6	0.0583157	-4.09997	2.67086e-06	2.96395e-05	down	56	50	40	905	1042	735
LOC101804666		65.2867	1657.54	0.0393876	-4.66611	2.70722e-06	3.00182e-05	down	59	3	131	1672	924	3418
ACSF2	Uncharacterized protein	17.0689	76.7407	0.222423	-2.16862	2.72589e-06	3.02004e-05	down	30	12	9	118	84	50
LOC101804149	transducin-like enhancer protein 1-like	492.781	190.085	2.59243	1.3743	2.74761e-06	3.0416e-05	up	479	470	533	213	192	234
LOC101794323	uncharacterized LOC101794323	105.928	16.9896	6.23485	2.64035	2.76578e-06	3.05919e-05	up	93	125	102	30	9	22
LOC101801686	uncharacterized LOC101801686	615.481	38.5508	15.9655	3.99688	2.86871e-06	3.17043e-05	up	869	443	529	41	56	23
FAM114A1	family with sequence similarity 114, member A1	304.078	106.924	2.84387	1.50786	2.8895e-06	3.19079e-05	up	257	312	347	124	138	80
LOC101800880	interleukin-9 receptor-like	72.0757	7.69521	9.3663	3.22748	2.89583e-06	3.19515e-05	up	84	57	75	13	7	6
LOC101798652	chromosome unknown open reading frame, human C6orf57	51.0049	166.189	0.30691	-1.70411	2.93826e-06	3.23931e-05	down	47	59	48	249	135	189
SMAP2	Uncharacterized protein	894.036	359.826	2.48463	1.31303	2.96789e-06	3.26929e-05	up	859	979	858	474	284	492
LOC101797703	Gap junction protein	133.578	7.96264	16.7755	4.06829	2.9794e-06	3.27929e-05	up	198	70	130	8	13	3
COMT	Uncharacterized protein	6285.66	1467.25	4.28397	2.09895	3.01771e-06	3.31874e-05	up	6470	6641	5827	1375	2216	941
UBE2QL1	ubiquitin-conjugating enzyme E2Q family-like 1	110.552	18.928	5.84066	2.54613	3.06023e-06	3.36138e-05	up	119	116	98	25	18	21
LOC101798815	prominin-1-A-like	82.4735	2.71932	30.3287	4.92261	3.06179e-06	3.36138e-05	up	65	129	57	3	3	3
PHF2	Uncharacterized protein	305.55	99.0117	3.086	1.62574	3.06398e-06	3.36138e-05	up	279	361	283	129	66	156
LOC101795784	Uncharacterized protein	400.673	977.433	0.409924	-1.28657	3.09144e-06	3.38874e-05	down	325	322	555	1147	970	1175
LOC101789969	Uncharacterized protein	42.187	168.423	0.250483	-1.99722	3.14941e-06	3.44948e-05	down	59	27	40	166	182	213
ELMO1	Uncharacterized protein	36.2993	128.242	0.283053	-1.82085	3.1816e-06	3.48189e-05	down	38	32	39	208	78	170
LOC101799628	zinc finger protein 729-like	106.258	21.6118	4.91665	2.29768	3.21257e-06	3.51294e-05	up	103	109	108	28	26	16
TNFAIP8L3	tumor necrosis factor, alpha-induced protein 8-like 3	6.61276	60.3207	0.109627	-3.18933	3.25902e-06	3.56083e-05	down	4	8	8	80	59	64
LOC101793866	formin-like	383.886	135.553	2.83201	1.50183	3.34212e-06	3.64866e-05	up	484	300	366	179	119	166
TANC1	Uncharacterized protein	3384.73	1499.77	2.25684	1.1743	3.37097e-06	3.67624e-05	up	3074	3935	3212	1859	1298	1996
HMHA1	Uncharacterized protein	52.0898	3.73208	13.9573	3.80295	3.37285e-06	3.67624e-05	up	53	56	48	6	1	7
MED15	Uncharacterized protein	579.73	169.766	3.41487	1.77183	3.37971e-06	3.68073e-05	up	659	415	661	214	133	244
MAPK12	Mitogen-activated protein kinase	115.303	376.034	0.306629	-1.70543	3.4523e-06	3.75675e-05	down	116	97	133	512	388	353
EEF2K	Uncharacterized protein	415.857	1017.97	0.408516	-1.29154	3.47143e-06	3.77451e-05	down	451	373	425	1067	943	1466
CCDC169	coiled-coil domain containing 169	59.9994	4.53267	13.2371	3.72651	3.49507e-06	3.79715e-05	up	45	83	54	1	2	14
ELFN1	extracellular leucine-rich repeat and fibronectin type III domain containing 1	53.0453	3.21703	16.4889	4.04342	3.51821e-06	3.81677e-05	up	48	76	37	3	3	5
NHSL1	NHS-like 1	687.003	52.4459	13.0993	3.71141	3.51881e-06	3.81677e-05	up	771	402	878	81	56	36
FAM65A	Uncharacterized protein	649.826	254.181	2.55655	1.3542	3.54181e-06	3.83863e-05	up	563	624	768	364	169	366
COL18A1	Uncharacterized protein	2143.78	443.125	4.83787	2.27437	3.6105e-06	3.90992e-05	up	2158	1610	2654	587	266	734
ZNF516	Uncharacterized protein	499.825	190.313	2.62634	1.39305	3.63734e-06	3.93582e-05	up	442	521	543	236	189	215
PLCG1	Phosphoinositide phospholipase C	255.537	80.5847	3.17103	1.66495	3.68177e-06	3.98069e-05	up	228	250	291	86	94	84
EED	Uncharacterized protein	400.088	150.236	2.66306	1.41309	3.70234e-06	3.99972e-05	up	311	544	358	173	111	244
ATP10B	Phospholipid-translocating ATPase	76.7861	0.497716	154.277	7.26938	3.72395e-06	4.01915e-05	up	39	123	72	0	0	2
LOC101797893	Centrin-1	570.326	201.059	2.83661	1.50417	3.7263e-06	4.01915e-05	up	559	734	433	289	160	247
FRMD6	Uncharacterized protein	463.131	170.974	2.70877	1.43764	3.74133e-06	4.03212e-05	up	506	381	502	218	141	232
IGFALS	Uncharacterized protein	1.35378	34.4443	0.0393036	-4.66919	3.76376e-06	4.05305e-05	down	1	0	3	40	29	50
SNX8	Uncharacterized protein	886.53	352.674	2.51374	1.32984	3.84388e-06	4.13602e-05	up	914	796	953	391	286	549
ACTG2	Actin, gamma-enteric smooth muscle	4226.81	1560.22	2.70911	1.43782	3.87274e-06	4.16373e-05	up	3840	3986	4885	2330	788	2536
LOC101799018	tropomyosin alpha-1 chain-like	374.903	6.00661	62.4151	5.96382	3.90506e-06	4.19513e-05	up	237	615	291	12	4	5
NR3C1	Glucocorticoid receptor	310.099	773.223	0.401048	-1.31815	3.96212e-06	4.25303e-05	down	227	417	296	873	702	1069
PLXDC2	Uncharacterized protein	254.716	9.29483	27.404	4.77632	3.96743e-06	4.25534e-05	up	359	150	251	15	11	4
TMEM51	Transmembrane protein 51	46.4346	170.552	0.272261	-1.87694	3.98607e-06	4.26949e-05	down	46	33	60	190	152	243
DCDC2	Uncharacterized protein	4087.6	105.314	38.8134	5.27848	3.98698e-06	4.26949e-05	up	4855	1945	5376	186	49	147
ARID5B	Uncharacterized protein	2606.05	1118.53	2.32988	1.22026	3.99367e-06	4.27326e-05	up	2525	2564	2753	1147	781	2039
PIP5K1A	Uncharacterized protein	825.144	331.845	2.48654	1.31414	4.11435e-06	4.39889e-05	up	808	936	746	357	268	530
PRSS35	Uncharacterized protein	1637.47	103.523	15.8174	3.98344	4.15831e-06	4.44236e-05	up	1373	2633	981	163	104	78
FADS6	Uncharacterized protein	55.0905	186.052	0.296103	-1.75583	4.21491e-06	4.49925e-05	down	40	39	86	198	183	248
LOC101798959	keratin, type II cytoskeletal 5-like	305.083	28.6843	10.6359	3.41087	4.21873e-06	4.49976e-05	up	178	391	355	42	11	53
TNFAIP6	Uncharacterized protein	515.547	3.50148	147.237	7.20199	4.24092e-06	4.51984e-05	up	178	709	678	3	5	3
LRRN4	Uncharacterized protein	591.918	29.9829	19.7418	4.30318	4.30233e-06	4.58166e-05	up	268	842	688	37	26	40
LOC101789961	forkhead box protein L1-like	83.7773	3.19939	26.1854	4.71069	4.33001e-06	4.60749e-05	up	45	94	114	2	3	6
CTSE	Uncharacterized protein	416.4	2.73744	152.113	7.249	4.36967e-06	4.64347e-05	up	262	709	300	0	0	11
LOC101790057	Cytochrome P450 4V2	113.6	394.823	0.287724	-1.79724	4.37073e-06	4.64347e-05	down	87	147	110	390	439	479
PTPRN2	protein tyrosine phosphatase, receptor type, N polypeptide 2	4.48251	566.138	0.0079177	-6.9807	4.45484e-06	4.72909e-05	down	1	13	0	613	776	399
NUTF2	Uncharacterized protein	779.832	317.546	2.45581	1.2962	4.47228e-06	4.74386e-05	up	744	825	781	411	243	454
LMOD1	Uncharacterized protein	968.695	154.92	6.25286	2.64452	4.48495e-06	4.75356e-05	up	714	1349	876	227	69	271
ALDH4A1	Uncharacterized protein	394.967	891.58	0.442996	-1.17463	4.50282e-06	4.76873e-05	down	400	364	423	1331	606	1205
PEX1	Uncharacterized protein	466.857	1101.15	0.423973	-1.23796	4.54597e-06	4.81064e-05	down	446	514	448	1326	1165	1174
PLCH1	Phosphoinositide phospholipase C	48.3302	3.0211	15.9975	3.99978	4.60571e-06	4.87003e-05	up	51	58	37	6	3	1
LOC101802019	Uncharacterized protein	87.5328	260.856	0.335559	-1.57536	4.64827e-06	4.91117e-05	down	84	79	100	297	219	386
LOC101798455	Uncharacterized protein	585.849	1373.36	0.42658	-1.22911	4.67126e-06	4.93159e-05	down	597	599	568	1753	1334	1545
NPM3	Uncharacterized protein	377.831	151.646	2.49154	1.31704	4.7649e-06	5.02651e-05	up	357	512	276	259	84	200
MKNK2	Uncharacterized protein	95.1887	401.364	0.237163	-2.07605	4.77049e-06	5.02845e-05	down	84	85	117	370	316	720
HAUS6	Uncharacterized protein	78.6228	234.797	0.334854	-1.57839	4.80313e-06	5.05889e-05	down	76	67	93	287	135	424
TTC38	Uncharacterized protein	871.242	366.841	2.37499	1.24792	4.82753e-06	5.08061e-05	up	749	1062	823	408	401	407
LOC101799930	A-kinase anchor protein 17B-like	668.791	1525.56	0.43839	-1.18971	4.87134e-06	5.12272e-05	down	710	639	662	2090	1190	2022
GOLIM4	Golgi integral membrane protein 4	1834.7	4052.28	0.452758	-1.14319	4.9788e-06	5.23163e-05	down	2048	1540	1916	4640	3567	5709
COL4A2	Uncharacterized protein	3879.46	706.83	5.48854	2.45642	5.01257e-06	5.263e-05	up	4669	4505	2533	876	660	865
FAM57A	Uncharacterized protein	144.433	34.14	4.23061	2.08087	5.06161e-06	5.31035e-05	up	159	151	125	55	25	39
SPINT1	Uncharacterized protein	2331.91	848.744	2.74749	1.45811	5.13104e-06	5.379e-05	up	2560	1731	2692	948	823	1102
UMODL1	Uncharacterized protein	411.951	9.81128	41.9875	5.39189	5.19446e-06	5.44124e-05	up	235	779	248	8	12	12
LOC101803441	inner centromere protein-like	41.762	0.532998	78.3529	6.29191	5.21507e-06	5.45858e-05	up	63	32	30	2	0	0
ZDHHC1	Palmitoyltransferase	100.323	18.6612	5.37604	2.42654	5.24381e-06	5.48439e-05	up	100	101	101	26	16	22
SLC16A5	Uncharacterized protein	15.1446	74.5405	0.203173	-2.29922	5.30579e-06	5.5449e-05	down	16	5	24	88	81	78
PITPNC1	Uncharacterized protein	137.486	33.5181	4.10185	2.03628	5.31361e-06	5.54876e-05	up	118	156	141	54	33	25
ME2	Malic enzyme	291.824	93.4996	3.12113	1.64207	5.3375e-06	5.56939e-05	up	233	349	300	143	78	100
TUBD1	Tubulin delta chain	3413.21	1504.8	2.26822	1.18156	5.35439e-06	5.58268e-05	up	3282	3568	3433	1558	1131	2601
LOC101804570	crk-like protein-like	886.558	365.775	2.42378	1.27726	5.44569e-06	5.67347e-05	up	974	907	788	521	292	453
PEX5	Uncharacterized protein	449.839	1040.58	0.432299	-1.2099	5.473e-06	5.69751e-05	down	425	395	531	1117	975	1453
LOC101801346	chromosome unknown open reading frame, human C3orf37	92.5467	277.281	0.333765	-1.58309	5.48989e-06	5.71067e-05	down	111	85	82	303	234	422
ABCD3	Uncharacterized protein	677.739	1568.4	0.432121	-1.21049	5.50878e-06	5.7259e-05	down	604	741	699	1882	1566	1826
REEP5	Uncharacterized protein	788.346	344.192	2.29043	1.19562	5.53396e-06	5.74762e-05	up	703	1045	640	424	343	390
WNT7A	Protein Wnt	518.943	201.442	2.57613	1.36521	5.69195e-06	5.90716e-05	up	582	457	519	222	199	259
STEAP1	Uncharacterized protein	119.438	6.25578	19.0924	4.25492	5.69944e-06	5.91037e-05	up	161	63	132	10	6	5
MKL2	Uncharacterized protein	506.307	1145.75	0.4419	-1.17821	5.9432e-06	6.15581e-05	down	449	624	458	1251	823	1971
CCT8	Uncharacterized protein	2857.2	1293.15	2.20949	1.14371	5.94528e-06	6.15581e-05	up	2330	3730	2593	1539	1066	1873
LOC101803839	mucin-17-like	653.382	267.85	2.43936	1.2865	6.05302e-06	6.26255e-05	up	462	761	751	240	207	494
CD38	Uncharacterized protein	2.32895	41.6622	0.0559008	-4.16099	6.18246e-06	6.39155e-05	down	1	2	4	32	30	86
SUCLA2	Succinyl-CoA ligase subunit beta	572.807	238.544	2.40126	1.26379	6.19804e-06	6.40274e-05	up	574	519	628	324	197	302
PPM1H	Protein phosphatase 1H	131.657	31.2792	4.2091	2.07351	6.2228e-06	6.42338e-05	up	158	130	108	48	32	24
MICU3	Uncharacterized protein	62.5404	195.335	0.32017	-1.64309	6.25308e-06	6.44969e-05	down	68	59	61	291	144	247
PIK3CB	Uncharacterized protein	566.018	223.97	2.5272	1.33754	6.31567e-06	6.50926e-05	up	557	624	526	308	205	248
SOCS1	Uncharacterized protein	337.934	15.6577	21.5826	4.43179	6.36598e-06	6.55609e-05	up	233	534	262	21	13	20
FDFT1	Uncharacterized protein	200.811	670.106	0.29967	-1.73855	6.37519e-06	6.56055e-05	down	177	261	170	761	794	630
TMEM184A	Uncharacterized protein	199.313	597.928	0.333339	-1.58494	6.40429e-06	6.58545e-05	down	140	194	266	527	557	963
LOC101795303	Uncharacterized protein	67596.3	488085	0.138493	-2.85212	6.42955e-06	6.60638e-05	down	70442	33914	97163	499174	322345	920172
LOC101790946	ran-binding protein 10-like	839.637	344.704	2.43582	1.28441	6.4947e-06	6.66822e-05	up	702	943	889	437	282	474
SNX4	Uncharacterized protein	472.784	194.759	2.42754	1.27949	6.54182e-06	6.71148e-05	up	465	454	503	224	213	208
CKAP4	Uncharacterized protein	572.895	118.527	4.83346	2.27306	6.60887e-06	6.77509e-05	up	541	774	421	161	159	54
ACAD9	Uncharacterized protein	955	2220.35	0.430112	-1.21722	6.63922e-06	6.80103e-05	down	874	1061	946	2664	2228	2568
PPIL6	Uncharacterized protein	0.955932	32.5631	0.0293563	-5.09019	6.69904e-06	6.85709e-05	down	0	3	0	18	36	55
DDX60	Uncharacterized protein	7.72485	70.7416	0.109198	-3.19498	6.72407e-06	6.87343e-05	down	5	3	15	54	104	63
LOC101801744	potassium voltage-gated channel subfamily H member 2-like	65.5034	5.58086	11.7372	3.55301	6.72523e-06	6.87343e-05	up	58	97	44	6	7	5
SYDE2	Uncharacterized protein	131.667	333.121	0.395254	-1.33915	6.77037e-06	6.91431e-05	down	137	127	132	383	265	512
MID1	Uncharacterized protein	41.0322	0.515357	79.619	6.31504	6.85622e-06	6.99667e-05	up	21	65	39	1	0	1
GRIP2	Uncharacterized protein	184.654	45.7295	4.03797	2.01363	6.8639e-06	6.9992e-05	up	165	151	238	57	31	74
SCAP	Uncharacterized protein	434.854	1031.86	0.421428	-1.24664	6.91717e-06	7.04818e-05	down	354	586	378	1290	992	1206
LOC101797184	calcium-binding and coiled-coil domain-containing protein 2-like	376.11	899.295	0.418228	-1.25764	6.92899e-06	7.05488e-05	down	345	442	349	976	888	1173
AIM1	absent in melanoma 1	685.514	91.4537	7.49575	2.90607	6.96021e-06	7.0813e-05	up	945	535	573	158	95	49
HDAC7	Uncharacterized protein	305.157	55.0248	5.54581	2.4714	7.03846e-06	7.1555e-05	up	293	225	396	70	51	66
LOC101790072	notch-regulated ankyrin repeat-containing protein A-like	251.176	65.3694	3.84241	1.94201	7.08221e-06	7.19455e-05	up	323	119	306	76	53	98
LOC101794093	partitioning defective 6 homolog gamma-like	249.483	43.8793	5.68567	2.50733	7.18185e-06	7.29025e-05	up	273	166	307	69	34	49
BTG1	Uncharacterized protein	2501.74	5512.41	0.453838	-1.13975	7.30418e-06	7.40884e-05	down	2583	2671	2285	6148	5405	7073
AP1AR	Uncharacterized protein	229.679	563.246	0.407776	-1.29415	7.31459e-06	7.41381e-05	down	178	271	245	673	568	650
STK38L	Uncharacterized protein	4143.01	1563.55	2.64975	1.40585	7.34177e-06	7.43575e-05	up	4274	3036	5096	1819	1188	2468
SRF	Uncharacterized protein	291.577	103.034	2.82992	1.50076	7.40546e-06	7.49461e-05	up	256	347	278	95	67	207
ABL2	Non-specific protein-tyrosine kinase	359.027	2864.5	0.125337	-2.99612	7.59342e-06	7.67906e-05	down	328	362	391	2418	2268	5357
LOC101791847	PCTP-like protein-like	60.5045	7.02109	8.61754	3.10728	7.62777e-06	7.708e-05	up	52	40	89	3	7	14
DPYSL2	Uncharacterized protein	2742.56	1244.36	2.204	1.14012	7.71965e-06	7.79495e-05	up	2288	3203	2793	1629	1067	1579
CUL4A	Uncharacterized protein	393.594	935.729	0.420628	-1.24938	7.7254e-06	7.79495e-05	down	289	475	426	1016	882	1286
CAP1	Adenylyl cyclase-associated protein	3207.11	1425.14	2.25038	1.17017	7.73738e-06	7.80118e-05	up	2948	3634	3097	1871	994	2161
LOC101789935	Diacylglycerol kinase	378.708	144.214	2.62601	1.39287	7.79125e-06	7.84962e-05	up	312	426	405	144	123	232
SLC2A12	Uncharacterized protein	140.514	418.792	0.335523	-1.57552	7.87535e-06	7.92261e-05	down	83	135	205	590	378	457
POLK	Uncharacterized protein	476.251	1451.38	0.328136	-1.60763	7.87549e-06	7.92261e-05	down	347	418	666	1325	1276	2408
TECR	Uncharacterized protein	60.2517	204.224	0.295028	-1.76108	7.99898e-06	8.04082e-05	down	46	70	66	287	165	254
CAPZB	Uncharacterized protein	3295.05	1473.3	2.23651	1.16125	8.07874e-06	8.11494e-05	up	3002	3969	2987	1945	1012	2247
MGAT4A	Uncharacterized protein	369.612	144.335	2.56078	1.35658	8.1202e-06	8.1505e-05	up	378	327	405	167	128	200
ITSN2	Uncharacterized protein	2442.7	5187.51	0.47088	-1.08657	8.136e-06	8.16027e-05	down	1819	3016	2554	5846	3746	8698
FBXL21	Uncharacterized protein	76.8689	231.522	0.332016	-1.59068	8.20131e-06	8.21965e-05	down	73	70	88	329	196	270
[truncated: 1,578 more rows]

## Sheet: FBS-8d Vs Con
Sheet S3. Differnetially expressed genes in comparison of FBS-8d vs DMSO-8d
[truncated: 4,413 more rows]

[truncated: 1 more sheets: overlapped]
