# Supplementary material for: Comparative Transcriptomic Analysis of Primary Duck Hepatocytes Provides Insight into Differential Susceptibility to DHBV Infection
Source: PLoS One. 2016 Feb 22;11(2):e0149702. doi: 10.1371/journal.pone.0149702 (PMC4763071; doi:10.1371/journal.pone.0149702)
Supplement: S2 File — (XLS) [file pone.0149702.s004.xls]

## Sheet: All
Pathways indicated by IPA for DEGs
Ingenuity Canonical Pathways	-log(p-value)	Ratio	z-score	Downregulated	No change	Upregulated	No overlap with dataset	Molecules
Hepatic Fibrosis / Hepatic Stellate Cell Activation	4.24E00	6.56E-02	NaN	2/183 (1%)	0/183 (0%)	10/183 (5%)	171/183 (93%)	COL5A1,COL1A1,COL5A2,COL4A1,ACTA2,CYP2E1,PDGFA,FGF2,COL8A1,COL4A2,A2M,COL15A1
Pyrimidine Ribonucleotides Interconversion	2.9E00	1.38E-01	NaN	2/29 (7%)	0/29 (0%)	2/29 (7%)	25/29 (86%)	NUDT5,CMPK2,ENTPD1,ENTPD2
FXR/RXR Activation	2.89E00	6.3E-02	NaN	8/127 (6%)	0/127 (0%)	0/127 (0%)	119/127 (94%)	ALB,C3,ABCB4,ITIH4,AMBP,GC,CYP8B1,RBP4
Pyrimidine Ribonucleotides De Novo Biosynthesis	2.79E00	1.29E-01	NaN	2/31 (6%)	0/31 (0%)	2/31 (6%)	27/31 (87%)	NUDT5,CMPK2,ENTPD1,ENTPD2
Wnt/β-catenin Signaling	2.68E00	5.33E-02	0.816	1/169 (1%)	0/169 (0%)	8/169 (5%)	160/169 (95%)	SOX4,UBB,AXIN2,FRZB,GNAO1,PPP2R2B,CD44,PPP2R2C,WNT5B
Clathrin-mediated Endocytosis Signaling	2.42E00	4.86E-02	NaN	3/185 (2%)	0/185 (0%)	6/185 (3%)	176/185 (95%)	ALB,UBB,ACTA2,EPHB2,PDGFA,FGF2,ACTG2,RBP4,ITGB3
Ethanol Degradation IV	2.38E00	1.5E-01	NaN	2/20 (10%)	0/20 (0%)	1/20 (5%)	17/20 (85%)	ALDH4A1,ACSS3,GPX7
PXR/RXR Activation	2.3E00	7.46E-02	NaN	4/67 (6%)	0/67 (0%)	1/67 (1%)	62/67 (93%)	ABCB1,CYP3A4,PRKAR1B,GSTA1,CES2
Dopamine-DARPP32 Feedback in cAMP Signaling	2.26E00	4.97E-02	2.449	0/161 (0%)	0/161 (0%)	8/161 (5%)	153/161 (95%)	PLCE1,GUCY1A3,PPP2R2B,PRKAR1B,CACNA1C,PLCG1,DRD5,PPP2R2C
Cellular Effects of Sildenafil (Viagra)	2.24E00	5.43E-02	NaN	0/129 (0%)	0/129 (0%)	7/129 (5%)	122/129 (95%)	PLCE1,GUCY1A3,ACTA2,PRKAR1B,CACNA1C,PLCG1,ACTG2
Leukocyte Extravasation Signaling	2.23E00	4.55E-02	2.236	1/198 (1%)	0/198 (0%)	8/198 (4%)	189/198 (95%)	CD99,ACTA2,JAM3,CD44,PLCG1,THY1,CLDN2,ACTG2,ITGB3
Melatonin Signaling	2.21E00	7.14E-02	1.342	0/70 (0%)	0/70 (0%)	5/70 (7%)	65/70 (93%)	PLCE1,CAMK2D,GNAO1,PRKAR1B,PLCG1
Caveolar-mediated Endocytosis Signaling	2.19E00	7.04E-02	NaN	1/71 (1%)	0/71 (0%)	4/71 (6%)	66/71 (93%)	ALB,ACTA2,ITGA8,ACTG2,ITGB3
Tight Junction Signaling	2.17E00	4.79E-02	NaN	1/167 (1%)	0/167 (0%)	7/167 (4%)	159/167 (95%)	ACTA2,JAM3,PPP2R2B,PRKAR1B,PPP2R2C,CLDN2,ACTG2,MAGI2
Acute Phase Response Signaling	2.14E00	4.73E-02	0.000	8/169 (5%)	0/169 (0%)	0/169 (0%)	161/169 (95%)	ALB,RBP7,C3,ITIH4,AMBP,HRG,A2M,RBP4
Dopamine Receptor Signaling	2.02E00	6.41E-02	NaN	1/78 (1%)	0/78 (0%)	4/78 (5%)	73/78 (94%)	GCH1,PPP2R2B,PRKAR1B,DRD5,PPP2R2C
Synaptic Long Term Depression	2.02E00	4.93E-02	1.134	0/142 (0%)	0/142 (0%)	7/142 (5%)	135/142 (95%)	PLA2G4A,PLCE1,GUCY1A3,GNAO1,PPP2R2B,PLCG1,PPP2R2C
Sertoli Cell-Sertoli Cell Junction Signaling	2.01E00	4.49E-02	NaN	2/178 (1%)	0/178 (0%)	6/178 (3%)	170/178 (96%)	GUCY1A3,ACTA2,JAM3,PRKAR1B,CLDN2,ACTG2,MAGI2,A2M
Sonic Hedgehog Signaling	1.88E00	1E-01	NaN	1/30 (3%)	0/30 (0%)	2/30 (7%)	27/30 (90%)	GLIS1,PRKAR1B,HHIP
Axonal Guidance Signaling	1.86E00	3.23E-02	NaN	1/433 (0%)	0/433 (0%)	13/433 (3%)	419/433 (97%)	EFNB2,PLCE1,ADAMTS6,GLIS1,PDGFA,EPHB2,GNAO1,LINGO1,PRKAR1B,PLCG1,HHIP,SEMA3F,WNT5B,UNC5C
Xenobiotic Metabolism Signaling	1.81E00	3.69E-02	NaN	5/271 (2%)	0/271 (0%)	5/271 (2%)	261/271 (96%)	ALDH4A1,ABCB1,CAMK2D,CYP3A4,PPP2R2B,CHST11,PPP2R2C,GSTA1,GRIP1,CES2
LXR/RXR Activation	1.81E00	4.96E-02	-0.816	6/121 (5%)	0/121 (0%)	0/121 (0%)	115/121 (95%)	ALB,C3,ITIH4,AMBP,GC,RBP4
Sperm Motility	1.81E00	4.96E-02	2.236	0/121 (0%)	0/121 (0%)	6/121 (5%)	115/121 (95%)	PLA2G4A,PLCE1,GUCY1A3,CACNA1H,PRKAR1B,PLCG1
Ethanol Degradation II	1.77E00	9.09E-02	NaN	3/33 (9%)	0/33 (0%)	0/33 (0%)	30/33 (91%)	ALDH4A1,ADH1A,ACSS3
Bile Acid Biosynthesis, Neutral Pathway	1.72E00	1.54E-01	NaN	2/13 (15%)	0/13 (0%)	0/13 (0%)	11/13 (85%)	CYP3A4,CYP8B1
Stearate Biosynthesis I (Animals)	1.67E00	8.33E-02	NaN	2/36 (6%)	0/36 (0%)	1/36 (3%)	33/36 (92%)	CYP2E1,ACSL6,ELOVL2
CDK5 Signaling	1.61E00	5.05E-02	2.236	0/99 (0%)	0/99 (0%)	5/99 (5%)	94/99 (95%)	LAMA5,PPP2R2B,PRKAR1B,DRD5,PPP2R2C
Estrogen Biosynthesis	1.61E00	7.89E-02	NaN	3/38 (8%)	0/38 (0%)	0/38 (0%)	35/38 (92%)	CYP3A4,CYP2E1,HSD17B2
Chondroitin Sulfate Degradation (Metazoa)	1.6E00	1.33E-01	NaN	0/15 (0%)	0/15 (0%)	2/15 (13%)	13/15 (87%)	GM2A,CD44
GDNF Family Ligand-Receptor Interactions	1.58E00	5.88E-02	NaN	1/68 (1%)	0/68 (0%)	3/68 (4%)	64/68 (94%)	PDLIM7,DOK4,PLCG1,IRS2
Agrin Interactions at Neuromuscular Junction	1.56E00	5.8E-02	2.000	0/69 (0%)	0/69 (0%)	4/69 (6%)	65/69 (94%)	NRG1,ACTA2,ACTG2,ITGB3
Dermatan Sulfate Degradation (Metazoa)	1.55E00	1.25E-01	NaN	0/16 (0%)	0/16 (0%)	2/16 (13%)	14/16 (88%)	GM2A,CD44
Oxidative Ethanol Degradation III	1.55E00	1.25E-01	NaN	2/16 (13%)	0/16 (0%)	0/16 (0%)	14/16 (88%)	ALDH4A1,ACSS3
LPS/IL-1 Mediated Inhibition of RXR Function	1.52E00	3.65E-02	NaN	5/219 (2%)	0/219 (0%)	3/219 (1%)	211/219 (96%)	ALDH4A1,ABCB1,CYP3A4,ACSL6,CHST11,GSTA1,CES2,FABP3
NRF2-mediated Oxidative Stress Response	1.51E00	3.89E-02	NaN	4/180 (2%)	0/180 (0%)	3/180 (2%)	173/180 (96%)	UBB,ACTA2,DNAJA3,GSTA1,ACTG2,EPHX1,FTH1
γ-linolenate Biosynthesis II (Animals)	1.5E00	1.18E-01	NaN	1/17 (6%)	0/17 (0%)	1/17 (6%)	15/17 (88%)	ACSL6,FADS1
Proline Degradation	1.48E00	5E-01	NaN	1/2 (50%)	0/2 (0%)	0/2 (0%)	1/2 (50%)	ALDH4A1
4-hydroxyproline Degradation I	1.48E00	5E-01	NaN	1/2 (50%)	0/2 (0%)	0/2 (0%)	1/2 (50%)	ALDH4A1
ILK Signaling	1.45E00	3.76E-02	0.000	1/186 (1%)	0/186 (0%)	6/186 (3%)	179/186 (96%)	ACTA2,PPP2R2B,VIM,PPP2R2C,IRS2,ACTG2,ITGB3
Gap Junction Signaling	1.35E00	3.87E-02	NaN	0/155 (0%)	0/155 (0%)	6/155 (4%)	149/155 (96%)	PLCE1,GUCY1A3,ACTA2,PRKAR1B,PLCG1,ACTG2
Synaptic Long Term Potentiation	1.32E00	4.2E-02	NaN	0/119 (0%)	0/119 (0%)	5/119 (4%)	114/119 (96%)	PLCE1,CAMK2D,PRKAR1B,CACNA1C,PLCG1
Tetrahydrobiopterin Biosynthesis I	1.31E00	3.33E-01	NaN	1/3 (33%)	0/3 (0%)	0/3 (0%)	2/3 (67%)	GCH1
Glycerol-3-phosphate Shuttle	1.31E00	3.33E-01	NaN	0/3 (0%)	0/3 (0%)	1/3 (33%)	2/3 (67%)	GPD2
Tetrahydrobiopterin Biosynthesis II	1.31E00	3.33E-01	NaN	1/3 (33%)	0/3 (0%)	0/3 (0%)	2/3 (67%)	GCH1

## Sheet: Top 25
Top 25 pathways indicated by IPA for DEGs
Ingenuity Canonical Pathways	Downregulated	Upregulated	No overlap with dataset	-log(p-value)	Ratio	z-score	Molecules
Hepatic Fibrosis / Hepatic Stellate Cell Activation	0.01	0.06	0.93	4.24	0.0656	NaN	COL5A1,COL1A1,COL5A2,COL4A1,ACTA2,CYP2E1,PDGFA,FGF2,COL8A1,COL4A2,A2M,COL15A1
Pyrimidine Ribonucleotides Interconversion	0.07	0.07	0.86	2.9	0.138	NaN	NUDT5,CMPK2,ENTPD1,ENTPD2
FXR/RXR Activation	0.06	0	0.94	2.89	0.063	NaN	ALB,C3,ABCB4,ITIH4,AMBP,GC,CYP8B1,RBP4
Pyrimidine Ribonucleotides De Novo Biosynthesis	0.06	0.06	0.88	2.79	0.129	NaN	NUDT5,CMPK2,ENTPD1,ENTPD2
Wnt/β-catenin Signaling	0.01	0.05	0.94	2.68	0.0533	0.816	SOX4,UBB,AXIN2,FRZB,GNAO1,PPP2R2B,CD44,PPP2R2C,WNT5B
Clathrin-mediated Endocytosis Signaling	0.02	0.03	0.95	2.42	0.0486	NaN	ALB,UBB,ACTA2,EPHB2,PDGFA,FGF2,ACTG2,RBP4,ITGB3
Ethanol Degradation IV	0.1	0.05	0.85	2.38	0.15	NaN	ALDH4A1,ACSS3,GPX7
PXR/RXR Activation	0.06	0.01	0.93	2.3	0.0746	NaN	ABCB1,CYP3A4,PRKAR1B,GSTA1,CES2
Dopamine-DARPP32 Feedback in cAMP Signaling	0	0.05	0.95	2.26	0.0497	2.449	PLCE1,GUCY1A3,PPP2R2B,PRKAR1B,CACNA1C,PLCG1,DRD5,PPP2R2C
Cellular Effects of Sildenafil (Viagra)	0	0.05	0.95	2.24	0.0543	NaN	PLCE1,GUCY1A3,ACTA2,PRKAR1B,CACNA1C,PLCG1,ACTG2
Leukocyte Extravasation Signaling	0.01	0.04	0.95	2.23	0.0455	2.236	CD99,ACTA2,JAM3,CD44,PLCG1,THY1,CLDN2,ACTG2,ITGB3
Melatonin Signaling	0	0.07	0.93	2.21	0.0714	1.342	PLCE1,CAMK2D,GNAO1,PRKAR1B,PLCG1
Caveolar-mediated Endocytosis Signaling	0.01	0.06	0.93	2.19	0.0704	NaN	ALB,ACTA2,ITGA8,ACTG2,ITGB3
Tight Junction Signaling	0.01	0.04	0.95	2.17	0.0479	NaN	ACTA2,JAM3,PPP2R2B,PRKAR1B,PPP2R2C,CLDN2,ACTG2,MAGI2
Acute Phase Response Signaling	0.05	0	0.95	2.14	0.0473	0.000	ALB,RBP7,C3,ITIH4,AMBP,HRG,A2M,RBP4
Dopamine Receptor Signaling	0.01	0.05	0.94	2.02	0.0641	NaN	GCH1,PPP2R2B,PRKAR1B,DRD5,PPP2R2C
Synaptic Long Term Depression	0	0.05	0.95	2.02	0.0493	1.134	PLA2G4A,PLCE1,GUCY1A3,GNAO1,PPP2R2B,PLCG1,PPP2R2C
Sertoli Cell-Sertoli Cell Junction Signaling	0.01	0.03	0.96	2.01	0.0449	NaN	GUCY1A3,ACTA2,JAM3,PRKAR1B,CLDN2,ACTG2,MAGI2,A2M
Sonic Hedgehog Signaling	0.03	0.07	0.9	1.88	0.1	NaN	GLIS1,PRKAR1B,HHIP
Axonal Guidance Signaling	0	0.03	0.97	1.86	0.0323	NaN	EFNB2,PLCE1,ADAMTS6,GLIS1,PDGFA,EPHB2,GNAO1,LINGO1,PRKAR1B,PLCG1,HHIP,SEMA3F,WNT5B,UNC5C
Xenobiotic Metabolism Signaling	0.02	0.02	0.96	1.81	0.0369	NaN	ALDH4A1,ABCB1,CAMK2D,CYP3A4,PPP2R2B,CHST11,PPP2R2C,GSTA1,GRIP1,CES2
LXR/RXR Activation	0.05	0	0.95	1.81	0.0496	-0.816	ALB,C3,ITIH4,AMBP,GC,RBP4
Sperm Motility	0	0.05	0.95	1.81	0.0496	2.236	PLA2G4A,PLCE1,GUCY1A3,CACNA1H,PRKAR1B,PLCG1
Ethanol Degradation II	0.09	0	0.91	1.77	0.0909	NaN	ALDH4A1,ADH1A,ACSS3
Bile Acid Biosynthesis, Neutral Pathway	0.15	0	0.85	1.72	0.154	NaN	CYP3A4,CYP8B1
